# Supplementary material for: Machine learning-based exploration of enzyme-substrate networks: SET8-mediated methyllysine and its changing impact within cancer proteomes
Source: Research Square preprint supplement (doi:10.21203/rs.3.rs-3771179/v1), 2024-02-27
Supplement: Supplementary file 1 [file e44023e7774e25f5242a9beb.xlsx]

## Sheet: Table 1
Supplementary Table 1. Permutated sequences for the 7 amino acid site surrounding lysine 20 on histone H4, with densitometry readings produced by exposure to SET8 on a peptide array.
Spot #	Permutated Sequence	Densitometry on Array
1	GGARRHRKVLRDNIQ	51774.5
2	GGAKRHRKVLRDNIQ	98510.2
3	GGAKRRRKVLRDNIQ	-16211.1
4	GGAKRHRKVLRDNIQ	136773
5	GGAKRHRRVLRDNIQ	-32145.5
6	GGAKRHRKRLRDNIQ	-13080.1
7	GGAKRHRKVRRDNIQ	-23556.5
8	GGAKRHRKVLRDNIQ	116679
9	GGAKRHRKVLRRNIQ	95695.2
10	GGAKRHRKVLRDNIQ	124874
11	GGAKKHRKVLRDNIQ	148860
12	GGAKRKRKVLRDNIQ	-9345.81
13	GGAKRHKKVLRDNIQ	117009
14	GGAKRHRKVLRDNIQ	113013
15	GGAKRHRKKLRDNIQ	-9330.81
16	GGAKRHRKVKRDNIQ	-9902.14
17	GGAKRHRKVLKDNIQ	45042.2
18	GGAKRHRKVLRKNIQ	113859
19	GGAHRHRKVLRDNIQ	76200.2
20	GGAKHHRKVLRDNIQ	124376
21	GGAKRHRKVLRDNIQ	114951
22	GGAKRHHKVLRDNIQ	62559.5
23	GGAKRHRHVLRDNIQ	-29060.8
24	GGAKRHRKHLRDNIQ	-17596.5
25	GGAKRHRKVHRDNIQ	-13824.8
26	GGAKRHRKVLHDNIQ	55127.9
27	GGAKRHRKVLRHNIQ	130768
28	GGADRHRKVLRDNIQ	58005.2
29	GGAKDHRKVLRDNIQ	135767
30	GGAKRDRKVLRDNIQ	1906.19
31	GGAKRHDKVLRDNIQ	31370.2
32	GGAKRHRDVLRDNIQ	-23053.5
33	GGAKRHRKDLRDNIQ	-3135.48
34	GGAKRHRKVDRDNIQ	-15390.8
35	GGAKRHRKVLDDNIQ	79896.9
36	GGAKRHRKVLRDNIQ	125719
37	GGAERHRKVLRDNIQ	32167.2
38	GGAKEHRKVLRDNIQ	77784.2
39	GGAKRERKVLRDNIQ	119.191
40	GGAKRHEKVLRDNIQ	51662.5
41	GGAKRHREVLRDNIQ	-32933.5
42	GGAKRHRKELRDNIQ	3116.19
43	GGAKRHRKVERDNIQ	-24982.1
44	GGAKRHRKVLEDNIQ	37332.5
45	GGAKRHRKVLRENIQ	127457
46	GGAARHRKVLRDNIQ	51780.2
47	GGAKAHRKVLRDNIQ	103496
48	GGAKRARKVLRDNIQ	-594.142
49	GGAKRHAKVLRDNIQ	66149.9
50	GGAKRHRAVLRDNIQ	-26237.1
51	GGAKRHRKALRDNIQ	14475.5
52	GGAKRHRKVARDNIQ	-7069.14
53	GGAKRHRKVLADNIQ	53148.2
54	GGAKRHRKVLRANIQ	128980
55	GGAVRHRKVLRDNIQ	58021.9
56	GGAKVHRKVLRDNIQ	95144.2
57	GGAKRVRKVLRDNIQ	3749.86
58	GGAKRHVKVLRDNIQ	132314
59	GGAKRHRVVLRDNIQ	-30981.5
60	GGAKRHRKVLRDNIQ	91947.5
61	GGAKRHRKVVRDNIQ	-730.475
62	GGAKRHRKVLVDNIQ	46093.9
63	GGAKRHRKVLRVNIQ	100268
64	GGAIRHRKVLRDNIQ	60624.2
65	GGAKIHRKVLRDNIQ	94287.5
66	GGAKRIRKVLRDNIQ	10629.2
67	GGAKRHIKVLRDNIQ	125917
68	GGAKRHRIVLRDNIQ	-29409.8
69	GGAKRHRKILRDNIQ	104589
70	GGAKRHRKVIRDNIQ	-13200.1
71	GGAKRHRKVLIDNIQ	58406.9
72	GGAKRHRKVLRINIQ	91562.5
73	GGALRHRKVLRDNIQ	12713.2
74	GGAKLHRKVLRDNIQ	64815.5
75	GGAKRLRKVLRDNIQ	-12314.1
76	GGAKRHLKVLRDNIQ	57588.5
77	GGAKRHRLVLRDNIQ	-19330.1
78	GGAKRHRKLLRDNIQ	38171.5
79	GGAKRHRKVLRDNIQ	106426
80	GGAKRHRKVLLDNIQ	67127.5
81	GGAKRHRKVLRLNIQ	78998.5
82	GGAMRHRKVLRDNIQ	12476.9
83	GGAKMHRKVLRDNIQ	113707
84	GGAKRMRKVLRDNIQ	-23498.5
85	GGAKRHMKVLRDNIQ	57942.9
86	GGAKRHRMVLRDNIQ	-33107.5
87	GGAKRHRKMLRDNIQ	-13824.5
88	GGAKRHRKVMRDNIQ	-22297.5
89	GGAKRHRKVLMDNIQ	55621.5
90	GGAKRHRKVLRMNIQ	98318.2
91	GGAFRHRKVLRDNIQ	24440.5
92	GGAKFHRKVLRDNIQ	99722.5
93	GGAKRFRKVLRDNIQ	10908.5
94	GGAKRHFKVLRDNIQ	47103.9
95	GGAKRHRFVLRDNIQ	-36030.1
96	GGAKRHRKFLRDNIQ	34283.9
97	GGAKRHRKVFRDNIQ	-15036.8
98	GGAKRHRKVLFDNIQ	18604.5
99	GGAKRHRKVLRFNIQ	66798.2
100	GGAYRHRKVLRDNIQ	28415.5
101	GGAKYHRKVLRDNIQ	113101
102	GGAKRYRKVLRDNIQ	-22005.5
103	GGAKRHYKVLRDNIQ	89511.9
104	GGAKRHRYVLRDNIQ	-34192.8
105	GGAKRHRKYLRDNIQ	25849.9
106	GGAKRHRKVYRDNIQ	-4805.48
107	GGAKRHRKVLYDNIQ	26464.9
108	GGAKRHRKVLRYNIQ	71192.9
109	GGAWRHRKVLRDNIQ	7990.52
110	GGAKWHRKVLRDNIQ	62536.5
111	GGAKRWRKVLRDNIQ	-27875.8
112	GGAKRHWKVLRDNIQ	13586.9
113	GGAKRHRWVLRDNIQ	-35686.8
114	GGAKRHRKWLRDNIQ	-22215.1
115	GGAKRHRKVWRDNIQ	-32261.5
116	GGAKRHRKVLWDNIQ	22594.2
117	GGAKRHRKVLRWNIQ	72977.9
118	GGASRHRKVLRDNIQ	4987.52
119	GGAKSHRKVLRDNIQ	119408
120	GGAKRSRKVLRDNIQ	-26748.8
121	GGAKRHSKVLRDNIQ	86976.5
122	GGAKRHRSVLRDNIQ	-35206.5
123	GGAKRHRKSLRDNIQ	-9399.14
124	GGAKRHRKVSRDNIQ	-3332.81
125	GGAKRHRKVLSDNIQ	24545.2
126	GGAKRHRKVLRSNIQ	87214.2
127	GGATRHRKVLRDNIQ	55602.2
128	GGAKTHRKVLRDNIQ	145747
129	GGAKRTRKVLRDNIQ	-17697.5
130	GGAKRHTKVLRDNIQ	26718.9
131	GGAKRHRTVLRDNIQ	-33587.5
132	GGAKRHRKTLRDNIQ	74165.9
133	GGAKRHRKVTRDNIQ	-33109.8
134	GGAKRHRKVLTDNIQ	45649.2
135	GGAKRHRKVLRTNIQ	117303
136	GGANRHRKVLRDNIQ	31761.9
137	GGAKNHRKVLRDNIQ	35473.2
138	GGAKRNRKVLRDNIQ	-9097.14
139	GGAKRHNKVLRDNIQ	-22058.8
140	GGAKRHRNVLRDNIQ	-31382.1
141	GGAKRHRKNLRDNIQ	-25724.1
142	GGAKRHRKVNRDNIQ	-33727.5
143	GGAKRHRKVLNDNIQ	14062.2
144	GGAKRHRKVLRNNIQ	67503.9
145	GGAQRHRKVLRDNIQ	34952.9
146	GGAKQHRKVLRDNIQ	62604.2
147	GGAKRQRKVLRDNIQ	-6573.48
148	GGAKRHQKVLRDNIQ	16576.5
149	GGAKRHRQVLRDNIQ	-35883.1
150	GGAKRHRKQLRDNIQ	-8936.14
151	GGAKRHRKVQRDNIQ	-13421.1
152	GGAKRHRKVLQDNIQ	40864.2
153	GGAKRHRKVLRQNIQ	77557.2
154	GGACRHRKVLRDNIQ	76440.5
155	GGAKCHRKVLRDNIQ	135343
156	GGAKRCRKVLRDNIQ	8224.52
157	GGAKRHCKVLRDNIQ	-4253.48
158	GGAKRHRCVLRDNIQ	-34490.1
159	GGAKRHRKCLRDNIQ	10159.5
160	GGAKRHRKVCRDNIQ	-2072.48
161	GGAKRHRKVLCDNIQ	32003.9
162	GGAKRHRKVLRCNIQ	110067
163	GGAGRHRKVLRDNIQ	91346.2
164	GGAKGHRKVLRDNIQ	154698
165	GGAKRGRKVLRDNIQ	-9376.81
166	GGAKRHGKVLRDNIQ	2821.86
167	GGAKRHRGVLRDNIQ	-34207.8
168	GGAKRHRKGLRDNIQ	-26051.5
169	GGAKRHRKVGRDNIQ	-30509.8
170	GGAKRHRKVLGDNIQ	61690.2
171	GGAKRHRKVLRGNIQ	115108
172	GGAPRHRKVLRDNIQ	101054
173	GGAKPHRKVLRDNIQ	148152
174	GGAKRPRKVLRDNIQ	31022.2
175	GGAKRHPKVLRDNIQ	2517.19
176	GGAKRHRPVLRDNIQ	-35406.8
177	GGAKRHRKPLRDNIQ	-24755.8
178	GGAKRHRKVPRDNIQ	-23527.5
179	GGAKRHRKVLPDNIQ	56347.9
180	GGAKRHRKVLRPNIQ	141468

## Sheet: Table 2
Supplementary Table 2. The methyllysine proteome cleaned from PhosphoSitePlus to remove duplicates and format peptide sequence (Site) for synthesis. Methylation confirmed in vitro by SET8 is described, as well as SPOT synthesis positioning corresponding to array figures.
Gene	Protein	Uniprot ID	Human Chromosome Position	Modified Lysine	MW (kD)	Domain	Site	Methylated by SET8	Synthesised on Array #	Spot # on Array
MYH9	MYH9	P35579	22q12.3	K8-m3	226.53		MAQQAADKYLYVDKN	1	5	565
PPP1R21	KLRAQ1	Q6ZMI0	2p16.3	K9-m1	88.31		ASAELQGKYQKLAQE	1	5	202
DIAPH1	Diaphanous-1	O60610	5q31.3	K42-m1	141.35		KSKKFTLKRLMADEL	1	3	83
SORCS1	SORCS1	Q8WY21	10q25.1	K700-m1	129.63	Sortilin_C	GAKRIYKKRKSERKC	1	8	323
NEK4	NEK4	P51957	3p21.1	K345-m1	94.6		LKSPASLKAHTCKQD	1	6	101
IQSEC1	IQSEC1	Q6DN90	3p25.2-p25.1	K918-m1	108.31		YASGEGLKRSALSSS	1	5	54
OTUD4	OTUD4	Q01804	4q31.21	K266-m1	124.04		VEYEIWLKSKQAQQK	1	6	298
MTHFS	MTHFS	P49914	15q25.1	K158-m1	23.26	5-FTHF_cyc-lig	GYYDAYLKRCLQHQE	1	5	528
MTHFSD	MTHFSD	Q2M296	16q24.1	K41-m1	42.17	5-FTHF_cyc-lig	HHRIPNFKGSYLACQ	1	5	529
IQSEC2	IQSEC2	Q5JU85	Xp11.22	K1468-m1	161.74		NPPSANPKAKPSRIS	1	5	56
KRBA2	KRBA2	Q6ZNG9	17p13.1	K25-m1	56.2		LLFSPGPKTIWSLWQ	1	5	208
IRF1	IRF1	P10914	5q31.1	K126-me	36.5		QRKERKSKSSRDAKS	1	5	57
MTMR4	MTMR4	Q9NYA4	17q22	K92-m2	133.35		FQLHISCKDSKVVRC	1	5	532
MIS18BP1	KNL2	Q6P0N0	14q21.2	K656-m1	129.09		YILVTPLKSRKVIEQ	1	5	204
OSBPL1A	OSBPL1A	Q9BXW6	18q11.2	K382-m1	108.47		REISNFLKMIKECDM	1	6	292
RBM12	RBM12	Q9NTZ6	20q11.22	K926-m1	97.4	RRM_1	DRPIGSRKVKLVLGA	1	7	331
MTR	MTR	Q99707	1q43	K817-m1	140.53	B12-binding	TPCDKILKAALDHKA	1	5	537
MTUS1	MTUS1	Q9ULD2	8p22	K180-m1	141.4		ISHHAIGKSQSFHTA	1	5	538
MTUS1	MTUS1	Q9ULD2	8p22	K786-m1	141.4		PRPLPKSKASLKSPA	1	5	539
MTUS1	MTUS1	Q9ULD2	8p22	K790-m1	141.4		PKSKASLKSPALRRT	1	5	540
POLI	POLI	Q9UNA4	18q21.2	K551-m1	83.01		LSGKSREKFQGKGSV	1	7	91
POLI	POLI	Q9UNA4	18q21.2	K555-m1	83.01		SREKFQGKGSVSCPL	1	7	92
NSD1	NSD1	Q96L73	5q35.3	K2506-m1	296.65		HMPRAVEKGCVSDPL	1	6	205
ITCH	ITCH	Q96J02	20q11.22	K53-m1	102.8	C2	TVDGQSKKTEKCNNT	1	5	64
FAM111B	FAM111B	Q6SJ93	11q12.1	K55-m1	84.67		RKCSSTFKLKSEVNK	1	3	426
KIN	KIN	O60870	10p14	K209-m1	45.37		KVTFNLSKGACSSSG	1	5	186
NEB	NEB	P20929	2q23.3	K4535-m1	772.91		RSALNYRKHYEDTKA	1	6	89
RBM17	RBM17	Q96I25	10p15.1	K24-m1	44.96		EGWSKNFKLLQSQLQ	1	7	333
SORCS1	SORCS1	Q8WY21	10q25.1	K702-m1	129.63	Sortilin_C	KRIYKKRKSERKCMQ	1	8	324
XRCC5	Ku80	P13010	2q35	K702-m1	82.7	Ku_PK_bind	SVTAEEAKKFLAPKD	1	5	221
ITGB3BP	NRIF3 iso5	Q13352-5	1p31.3	K27-m1	24.73		QHLLPAFKRFSCLSL	1	6	197
NEPRO	NEPRO	Q6NW34	3q13.2	K332-m1	64.55		QETSFDFKCSQSRLK	1	6	104
INPP5A	INPP5A	Q14642	10q26.3	K407-m2	47.82		KPHAHVHKCCVVQAA	1	5	33
PLD1	PLD1	Q13393	3q26.31	K132-m1	124.18	PX	EFHRELLKYKAFIRI	1	7	62
MPP7	MPP7	Q5T2T1	10p12.1	K311-m1	65.52		EILVQPLKVSNRKSS	1	5	489
PLD1	PLD1	Q13393	3q26.31	K406-m1	124.18		WRLDCILKRKAQQGV	1	7	63
RYBP	RYBP	Q8N488	3p13	K40-m1	24.82	zf-RanBP	RNSAEAFKCSICDVR	1	8	4
NR5A2	NR5A2	O00482	1q32.1	K173-m2	61.33		NKFGPMYKRDRALKQ	1	6	190
RYK	RYK	P34925	3q22.2	K417-m1	67.51	Pkinase_Tyr	YMNWGNLKLFLRQCK	1	8	6
TRANK1	LBA1	O15050	3p22.2	K636-m1	336.22		PGHTSQLKSQGSFKS	1	5	248
PACRGL	PACRGL iso2	Q8N7B6-2	4p15.31	K212-m1	24.1		SLSIIKSKIPTYCSI	1	6	323
PACRGL	PACRGL iso2	Q8N7B6-2	4p15.31	K210-m1	24.1		SGSLSIIKSKIPTYC	1	6	322
HSPA8	HSC70	P11142	11q24.1	K569-m1	70.9	HSP70	INDEDKQKILDKCNE	1	4	350
LASP1	Lasp-1	Q14847	17q12	K92-m1	29.72	Nebulin	RYKEEFEKNKGKGFS	1	5	244
SGO2	SGOL2	Q562F6	2q33.1	K1070-m3	144.74		KEGECQVKKVNKMTS	1	8	156
MRPS5	MRPS5	P82675	2q11.1	K426-m1	48.01		RSVWSNLKRAATAAA	1	5	501
IPO7	IPO7	O95373	11p15.4	K403-m2	119.52	Cse1	LLFTACSKRKEVLQK	1	5	40
IPO7	IPO7	O95373	11p15.4	K445-m1	119.52	Cse1	SLAEILLKKKIYKDQ	1	5	41
TP63	p63	Q9H3D4	3q28	K242-m1	76.79	P53	EHVTEVVKRCPNHEL	1	6	314
IPO7	IPO7	O95373	11p15.4	K446-m1	119.52	Cse1	LAEILLKKKIYKDQM	1	5	42
IQCB1	IQCB1	Q15051	3q13.33|3q21.1	K331-m2	68.93		LQRSFRSKRSKMLLE	1	5	44
MSH6	MSH6	P52701	2p16.3	K833-m1	152.79	MutS_III	HNVGSPLKSQNHPDS	1	5	508
MSH6	MSH6	P52701	2p16.3	K1092-m1	152.79		TPPFLELKGSRHPCI	1	5	509
RECQL	RECQL	P46063	12p12.1	K88-m1	73.46		DILQNVFKLEKFRPL	1	7	365
RCN1	RCN1	Q15293	11p13	K81-m1	38.89		QLTPDESKERLGKIV	1	7	363
NDC80	HEC1	O14777	18p11.32	K59-m1	73.91	Ndc80_HEC	RKVSLFGKRTSGHGS	1	4	231
IQCN	IQCN	Q9H0B3	19p13.11	K561-m2	127.69		AKATVNVKQAAKVVK	1	5	47
NDUFV3	NDUFV3 iso2	P56181-2	21q22.3	K266-m1	50.98		LKQSLKEKQLQKTFR	1	6	88
ITLN2	ITLN2	Q8WWU7	1q23.3	K201-m2	36.21		NLFGIYQKYPVKYRS	1	5	70
NPNT	NPNT	Q6UXI9	4q24	K96-m3	61.91	EGF_CA	DLNECGLKPRPCKHR	1	6	188
NCL	NCL	P19338	2q37.1	K96-m1	76.61		AAATPAKKTVTPAKA	1	6	67
PPP1R12A	MYPT1	O14974	12q21.2-q21.31	K1002-m2	115.28	PRKG1_interact	SEMEEELKMLPDLKA	1	6	22
KIAA1109	KIAA1109	Q2LD37	4q27	K2609-m1	555.48		ASPTPTFKTRKHRDF	1	5	144
PPP1R12A	MYPT1	O14974	12q21.2-q21.31	K1008-m2	115.28	PRKG1_interact	LKMLPDLKADNQRLK	1	6	23
GAPDH	GAPDH	P04406	12p13.31	K260-m2	36.05	Gp_dh_C	AKYDDIKKVVKQASE	1	3	567
KAT6A	MYST3	Q92794	8p11.21	K1147-m1	225.03		PDTSTPLKKKKGWPK	1	6	25
KAT6A	MYST3	Q92794	8p11.21	K1148-m1	225.03		DTSTPLKKKKGWPKG	1	6	26
POU6F1	POU6F1	Q14863	12q13.13	K233-m2	32.65		FVGGEPSKKRKRRTS	1	7	121
NWD2	NWD2	Q9ULI1	4p14	K1718-m2	197.47		SNEATPSKKHNSCYE	1	6	255
MKI67	KI-67	P46013	10q26.2	K1860-m1	358.69	K167R	TTKKILCKSPQSDPA	1	5	137
CKLF	CKLF	Q9UBR5	16q21	K22-m1	17.17		FSVKGHVKMLRLALT	1	2	280
CKLF	CKLF	Q9UBR5	16q21	K18-m1	17.17		RPFCFSVKGHVKMLR	1	2	279
STUB1	CHIP	Q9UNE7	16p13.3	K41-m1	34.86	ANAPC3	NRLFVGRKYPEAAAC	1	2	249
KRT18	K18	P05783	12q13.13	K426-m1	48.06		VSETNDTKVLRHAAA	1	5	95
NDUFV3	NDUFV3 iso2	P56181-2	21q22.3	K264-m1	50.98		EFLKQSLKEKQLQKT	1	6	87
VWA5B1	VWA5B1	Q5TIE3	1p36.12	K311-m3	133.8		KGRTDFIKGMKKKSR	1	9	241
NAA16	NAA16	Q6N069	13q14.11	K24-m1	101.46		ILKCYEQKQYKNGLK	1	6	36
NAA25	NAA25	Q14CX7	12q24.13	K40-m1	112.29		QADKLLKKHKDLHCA	1	6	37
RAD54B	RAD54B	Q9Y620	8q22.1	K226-m1	102.97		HSSQVARKCFSNPFK	1	7	273
PPP1R36	PPP1R36	Q96LQ0	14q23.3	K105-m1	49.44	PPPI_inhib	AKDDKSAKAVEKRGQ	1	7	152
NCKAP5L	NCKAP5L	Q9HCH0	12q13.12	K920-m1	139.01	NCKAP5	IASWFGLKKSKLPAL	1	6	63
PPP1R26	PPP1R26	Q5T8A7	9q34.3	K751-m1	127.35	PPP1R26_N	DRGPPVLKSCLSKSK	1	7	151
PPP1R14C	KEPI	Q8TAE6	6q25.1	K75-m1	17.84	PP1_inhibitor	QQGKVTVKYDRKELR	1	5	123
KCTD3	KCTD3	Q9Y597	1q41	K750-m1	88.98		SEDENENKIEFRKKG	1	5	122
SENP1	SENP1	Q9P0U3	12q13.11	K136-m1	73.48		LSNSFAGKSNHHCHV	1	8	97
KRT86	K86	O43790	12q13.13	K377-m2	53.5	Filament	ELEGALQKAKQDMAC	1	5	116
KRT82	K82	Q9NSB4	12q13.13	K354-m3	56.65	Filament	QQETENVKAQRCKLE	1	5	112
PPP1R12A	MYPT1	O14974	12q21.2-q21.31	K551-m1	115.28		NEGSTYHKSCSFGRR	1	6	20
SETD1B	SETD1B	Q9UPS6	12q24.31	K41-m2	212.8		LMIDPALKKGHHKLY	1	8	121
EZH2	EZH2	Q15910	7q36.1	K509-m2	85.36		HCRKIQLKKDGSSNH	1	3	415
EZH2	EZH2	Q15910	7q36.1	K510-m2	85.36		CRKIQLKKDGSSNHV	1	3	416
MYH11	MYH11	P35749	16p13.11	K1925-m1	227.34	Myosin_tail_1	GREVNALKSKLRRGN	1	5	557
IWS1	IWS1	Q96ST2	2q14.3	K794-m1	91.95		RLDKQMRKFTDIRKK	1	5	72
AHNAK2	AHNAK2	Q8IVF2	14q32.33	K994-m3	616.63		ADKDVTAKDSKFKMP	1	1	202
NSUN5	NSUN5	Q96P11	7q11.23	K144-m1	46.69		FVRVNTLKTCSDDVV	1	6	211
ODR4	ODR4	Q5SWX8	1q31.1	K282-m1	51.1	ODR4-like	CSGSVNLKGAVKCRA	1	6	273
KIF2A	KIF2A	O00139	5q12.1	K169-m1	79.95		EVEKLQEKREKRRLQ	1	5	173
MYH7	MYH7	P12883	14q11.2	K1324-m3	223.1	Myosin_tail_1	RQLEEEVKAKNALAH	1	5	564
NDUFB7	NDUFB7	P17568	19p13.12	K68-m1	16.4	NDUF_B7	HHLIRLLKCKRDSFP	1	6	82
MYH9	MYH9	P35579	22q12.3	K199-m1	226.53	Myosin_head	AYVASSHKSKKDQGE	1	5	566
MYH9	MYH9	P35579	22q12.3	K299-m1	226.53	Myosin_head	LLLEPYNKYRFLSNG	1	5	567
KIF1C	KIF1C	O43896	17p13.2	K1057-m1	122.95		PQHFQPKKHNSYPQP	1	5	167
MYH9	MYH9	P35579	22q12.3	K651-m1	226.53	Myosin_head	RTVGQLYKEQLAKLM	1	5	568
MYH9	MYH9	P35579	22q12.3	K1442-m2	226.53	Myosin_tail_1	SACNLEKKQKKFDQL	1	5	569
SCN7A	SCN7A	Q01118	2q24.3	K466-m1	193.49		RHKEELEKSKKICPL	1	8	65
MYO15A	MYO15A	Q9UKN7	17p11.2	K577-m3	395.29		TSLARFLKKTLSEKK	1	6	4
MYO15A	MYO15A	Q9UKN7	17p11.2	K584-m3	395.29		KKTLSEKKPIARLRG	1	6	6
WDR87	WDR87	Q6ZQQ6	19q13.13	K2194-m1	333.19		EEVIPFLKRRWRKRK	1	9	273
WDR87	WDR87	Q6ZQQ6	19q13.13	K1394-m2	333.19		ISKKEEKKTFQKSPK	1	9	272
POU5F1	04-Oct	Q01860	6p21.33	K195-m1	38.57	Pou	EALQLSFKNMCKLRP	1	6	268
SETD2	SETD2	Q9BYW2	3p21.31	K1465-m2	287.6		QRWKECAKQGKMPCY	1	8	127
SMTNL2	SMTNL2	Q2TAL5	17p13.2	K354-m1	50.2	CH	VASASSIKQILLEWC	1	8	290
MYO1G	MYO1G	B0I1T2	7p13	K140-m1	116.44	Myosin_head	RVKDVLLKSTCVLEA	1	6	12
SETD2	SETD2	Q9BYW2	3p21.31	K1461-m2	287.6		FRDPQRWKECAKQGK	1	8	126
KRT14	K14	P02533	17q21.2	K15-m1	51.56		FTSSSSMKGSCGIGG	1	5	84
SLK	SLK	Q9H2G2	10q24.33-q25.1	K1205-m1	142.69		QEQEVFFKMTGESEC	1	8	246
MPHOSPH8	MPHOSPH8	Q99549	13q12.11	K436-m1	97.18		EKGRKEPKGLKTLKE	1	5	486
PURA	PURA	Q00577	5q31.3	K154-m1	34.91	PurA	FLVRENRKYYMDLKE	1	7	241
SLC25A12	SLC25A12	O75746	2q31.1	K377-m1	74.76	Mito_carr	KNSFDCFKKVLRYEG	1	8	209
HSP90AB1	HSP90B	P08238	6p21.1	K565-m1	83.26	HSP90	AKFENLCKLMKEILD	1	4	393
RPL7	RPL7	P18124	8q21.11	K124-m1	29.23	Ribosomal_L30	IFNGTFVKLNKASIN	1	7	516
MGA	MGA	Q8IWI9	15q15.1	K937-m1	336.16		SHVILGDKVTKNSSG	1	5	427
TAAR1	TAAR1	Q96RJ0	6q23.2	K134-m1	39.09	7tm_1	DPLRYKAKMNILVIC	1	8	458
RPL27A	RPL27A	P46776	11p15.4	K55-m1	16.56	Ribosomal_L27A	YHPGYFGKVGMKHYH	1	7	484
MAP3K15	MAP3K15	Q6ZN16	Xp22.12	K751-m1	147.44	Pkinase	PMKEPTIKFYTKQIL	1	5	357
IBTK	IBTK	Q9P2D0	6q14.1	K1230-m1	150.53		HVKKVSFKGIENSQA	1	4	415
ICK	ICK	Q9UPZ9	6p12.1	K491-m1	71.43		AAKQHYLKHSRYLPG	1	4	416
RIMS2	RIMS2	Q9UQ26	8q22.3	K52-m1	160.4		DRQKKKVKEEHKPQL	1	7	425
RIMS2	RIMS2	Q9UQ26	8q22.3	K49-m1	160.4		AVMDRQKKKVKEEHK	1	7	424
RPL26	RPL26	P61254	17p13.1	K103-m1	17.26	Ribosomal_L26; KOW	HVGIHPSKVVITRLK	1	7	483
MCM4	MCM4	P33991	8q11.21	K806-m3	96.56		EELAEALKKLILSKG	1	5	389
SLC12A1	NKCC2	Q13621	15q21.1	K735-m1	121.45	SLC12	MNSGMAKKQAWLIKN	1	6	151
NHEJ1	NHEJ1	Q9H9Q4	2q35	K288-m3	33.34		LQRPQLSKVKRKKPR	1	6	130
MCM4	MCM4	P33991	8q11.21	K216-m1	96.56	MCM_N	NVNCEHIKSFDKNLY	1	5	387
SLC25A13	SLC25A13	Q9UJS0	7q21.3	K484-m1	74.18	Mito_carr	LGFFGIYKGAKACFL	1	8	212
NGLY1	NGLY1	Q96IV0	3p24.2	K204-m1	74.39		CIPVQELKRKSQEKL	1	6	128
MCPH1-AS1	LOC100507530	Q96LV3	8p23.1	K14-m2	18.52		INLLMDKKYWLSYKV	1	5	307
NFX1	NFX1	Q12986	9p13.3	K292-m1	124.39		DLNERPAKSTCDSEN	1	6	127
RSL1D1	CSIG	O76021	16p13.13	K120-m1	54.97	Ribosomal_L1	FYRKLLNKHGIKTVS	1	2	360
IFIT2	IFIT2	P09913	10q23.31	K309-m1	54.63		RENGMYGKRKLLELI	1	5	5
RPL24	RPL24	P83731	3q12.3	K147-m1	17.78		QKIVKPVKVSAPRVG	1	7	481
IFRD2	IFRD2	Q12894	3p21.31	K489-m1	54.81	IFRD_C	LYNAAAFKARTKARS	1	5	6
ARPP19	ARPP-19	P56211	15q21.2	K55-m1	12.32	Endosulfine	FLRKRLQKGQKYFDS	1	1	405
HSPA1B	HSP70	P0DMV8	6p21.33	K567-m1	70.05	HSP70	GKISEADKKKVLDKC	1	4	368
SLC12A1	NKCC2	Q13621	15q21.1	K722-m1	121.45	SLC12	EVFVGPRKLCVKEMN	1	6	150
PFKP	PFKP	Q01813	10p15.2	K109-m1	85.6	PFK	RTREGRLKAACNLLQ	1	6	397
RPL6	RPL6	Q02878	12q24.13	K218-m1	32.73	Ribosomal_L6e	HLTDAYFKKKKLRKP	1	7	514
PDIA6	PDIA6	Q15084	2p25.1	K66-m1	48.12	Thioredoxin	QRLTPEWKKAATALK	1	6	383
P4HB	PDIA1	P07237	17q25.3	K467-m1	57.12	Thioredoxin	ERTLDGFKKFLESGG	1	6	382
SIL1	SIL1	Q9H173	5q31.2	K109-m1	52.08		AKLQYEDKFRNNLKG	1	8	186
HSPA1L	HSPA1L	P34931	6p21.33	K73-m1	70.38	HSP70	QNTVFDAKRLIGRKF	1	4	395
RNF214	RNF214	Q8ND24	11q23.3	K136-m1	77.67		HPVTRSLKAGCHTKQ	1	7	452
PELO	PELO	Q9BRX2	5q11.2	K254-m1	43.36	eRF1_2	SGHKYSLKEALCDPT	1	6	388
SSH1	SSH1	Q8WYL5	12q24.11	K758-m1	115.51		LPKSLLLKNSHCDKN	1	8	395
MACF1	ACF7	Q9UPN3	1p34.3	K6604-m1	838.31	Spectrin	FQKTLGGKQPVYDTT	1	1	43
FAM83H	FAM83H	Q6ZRV2	8q24.3	K1176-m1	127.12		PKILGTFKSKKAAAA	1	3	472
RNF40	RNF40	O75150	16p11.2	K795-m1	113.68		KLMSERIKANQIHKL	1	7	454
NOP56	NOL5A	O00567	20p13	K478-m1	66.05		ECEEMSEKPKKKKKQ	1	6	168
PHF20	PHF20	Q9BVI0	20q11.22-q11.23	K177-m2	115.39	DUF3776	RKATVNVKKDKEDKP	1	7	2
MED27	MED27	Q6P2C8	9q34.13	K134-m1	35.43		LLNQQSLKRSANQMG	1	5	414
MED8	MED8	Q96G25	1p34.2	K259-m1	29.08	Med8	SGIKTNIKSASMHPY	1	5	415
NOP56	NOL5A	O00567	20p13	K480-m1	66.05		EEMSEKPKKKKKQKP	1	6	169
PHF2	PHF2	O75151	9q22.31	K642-m2	120.77		FSFSFSNKKLLGSKA	1	6	419
PHF2	PHF2	O75151	9q22.31	K631-m2	120.77		KSPLAGNKDNKFSFS	1	6	418
ABCB9	ABCB9	Q9NP78	12q24.31	K355-m1	84.47	ABC_membrane	KYYKRLSKEVQNALA	1	1	24
MEN1	MEN1	O00255	11q13.1	K609-m1	68.02	Menin	DYTLSFLKRQRKGLA	1	5	420
NOL9	NOL9	Q5SY16	1p36.31	K9-m1	79.32		ADSGLLLKRGSCRST	1	6	173
SLC10A2	ASBT	Q12908	13q33.1	K313-m1	37.71		GFYVAYKKCHGKNKA	1	1	408
RPL5	RPL5	P46777	1p22.1	K283-m1	34.36	Ribosomal_L18_c	KKDRVAQKKASFLRA	1	7	512
HSPA1B	HSP70	P0DMV8	6p21.33	K568-m1	70.05	HSP70	KISEADKKKVLDKCQ	1	4	369
LMO7	LMO7	Q8WWI1	13q22.2	K775-m1	192.7	DUF4757	KQALEKSKRSSKTFK	1	5	301
MARCKS	MARCKS	P29966	6q21	K161-m1	31.55	MARCKS	KKKRFSFKKSFKLSG	1	5	364
MCHR1	MCHR1	Q99705	22q13.2	K389-m1	45.96		VLCETFRKRLVLSVK	1	5	383
IL16	IL16	Q14005	15q25.1	K978-m3	141.75		RSQSCETKLLDEKTS	1	5	15
ILF2	ILF2	Q12905	1q21.3	K59-m1	43.06		SFSEALLKRNQDLAP	1	5	18
ILK	ILK	Q13418	11p15.4	K170-m1	51.42		PYKDTFWKGTTRTRP	1	5	19
ILKAP	ILKAP	Q9H0C8	2q37.3	K204-m1	42.91	PP2C	HTDEEFLKQASSQKP	1	5	20
HTATSF1	TAT-SF1	O43719	Xq26.3	K234-m1	85.85		SKKKKKCKDYKKKLS	1	8	487
IMMP2L	IMMP2L	Q96T52	7q31.1	K112-m1	19.72	Peptidase_S24	GHKNRYVKVPRGHIW	1	5	21
PATJ	INADL	Q8NI35	1p31.3	K1027-m1	196.37		QATRVISKASAYTGM	1	5	22
STK39	STLK3	Q9UEW8	2q24.3	K312-m1	59.47	Pkinase	KYGKSFRKLLSLCLQ	1	8	416
LEMD2	LEMD2	Q8NC56	6p21.31	K264-m1	56.98	MSC	TDEFCQAKQKAALLE	1	5	272
INCENP	INCENP	Q9NQS7	11q12.3	K916-m1	105.43		SSLAYSLKKHAAAAA	1	5	26
MLXIP	MLXIP	Q9HAP2	12q24.31	K140-m2	101.19		MTLAYSGKLVSPKWK	1	5	473
RFX8	RFX8	Q6ZV50	2q11.2	K307-m3	66.27		KTMRMVLKSKRRVSV	1	7	392
RFX8	RFX8	Q6ZV50	2q11.2	K300-m3	66.27		TYLSNMAKTMRMVLK	1	7	391
MON2	MON2	Q7Z3U7	12q14.1	K11-m1	190.36	DCB	TSSPEAVKKLLENMQ	1	5	476
PFN1	profilin 1	P07737	17p13.2	K54-m1	15.05	Profilin	EVGVLVGKDRSSFYV	1	7	181
OPRM1	MOR-1 iso5	P35372-5	6q25.2	K410-m2	47.03		PPPTHREKTCNDYMK	1	5	478
MORC1	MORC1	Q86VD1	3q13.13	K765-m2	112.88		CNDVLAMKRSSSLPS	1	5	479
INF2	INF2	Q27J81	14q32.33	K4-m1	135.62		AAAAMSVKEGAQRKW	1	5	28
HIST1H4A	H4	P62805	6p22.2	K16-m3	11.24		GLGKGGAKRHRKVLR	1	4	207
HIST1H4A	H4	P62805	6p22.2	K20-m2	11.24	CENP-T_C	GGAKRHRKVLRDNIQ	1	2	1
HIST1H4A	H4	P62805	6p22.2	K20-m2	11.24	CENP-T_C	GGAKRHRKVLRDNIQ	1	2	21
HIST1H4A	H4	P62805	6p22.2	K20-m2	11.24	CENP-T_C	GGAKRHRKVLRDNIQ	1	2	400
HIST1H4A	H4	P62805	6p22.2	K20-m2	11.24	CENP-T_C	GGAKRHRKVLRDNIQ	1	2	420
HIST1H4A	H4	P62805	6p22.2	K20-m2	11.24	CENP-T_C	GGAKRHRKVLRDNIQ	1	2	1
HIST1H4A	H4	P62805	6p22.2	K20-m2	11.24	CENP-T_C	GGAKRHRKVLRDNIQ	1	2	30
HIST1H4A	H4	P62805	6p22.2	K20-m2	11.24	CENP-T_C	GGAKRHRKVLRDNIQ	1	2	541
HIST1H4A	H4	P62805	6p22.2	K20-m2	11.24	CENP-T_C	GGAKRHRKVLRDNIQ	1	2	570
HIST1H4A	H4	P62805	6p22.2	K20-m2	11.24	CENP-T_C	GGAKRHRKVLRDNIQ	1	2	1
HIST1H4A	H4	P62805	6p22.2	K20-m2	11.24	CENP-T_C	GGAKRHRKVLRDNIQ	1	2	30
HIST1H4A	H4	P62805	6p22.2	K20-m2	11.24	CENP-T_C	GGAKRHRKVLRDNIQ	1	2	571
HIST1H4A	H4	P62805	6p22.2	K20-m2	11.24	CENP-T_C	GGAKRHRKVLRDNIQ	1	2	600
HIST1H4A	H4	P62805	6p22.2	K20-m2	11.24	CENP-T_C	GGAKRHRKVLRDNIQ	1	2	1
HIST1H4A	H4	P62805	6p22.2	K20-m2	11.24	CENP-T_C	GGAKRHRKVLRDNIQ	1	2	21
HIST1H4A	H4	P62805	6p22.2	K20-m2	11.24	CENP-T_C	GGAKRHRKVLRDNIQ	1	2	400
HIST1H4A	H4	P62805	6p22.2	K20-m2	11.24	CENP-T_C	GGAKRHRKVLRDNIQ	1	2	420
HIST1H4A	H4	P62805	6p22.2	K20-m2	11.24	CENP-T_C	GGAKRHRKVLRDNIQ	1	2	1
HIST1H4A	H4	P62805	6p22.2	K20-m2	11.24	CENP-T_C	GGAKRHRKVLRDNIQ	1	2	30
HIST1H4A	H4	P62805	6p22.2	K20-m2	11.24	CENP-T_C	GGAKRHRKVLRDNIQ	1	2	541
HIST1H4A	H4	P62805	6p22.2	K20-m2	11.24	CENP-T_C	GGAKRHRKVLRDNIQ	1	2	570
HIST1H4A	H4	P62805	6p22.2	K20-m2	11.24	CENP-T_C	GGAKRHRKVLRDNIQ	1	2	1
HIST1H4A	H4	P62805	6p22.2	K20-m2	11.24	CENP-T_C	GGAKRHRKVLRDNIQ	1	2	30
HIST1H4A	H4	P62805	6p22.2	K20-m2	11.24	CENP-T_C	GGAKRHRKVLRDNIQ	1	2	458
HIST1H4A	H4	P62805	6p22.2	K20-m2	11.24	CENP-T_C	GGAKRHRKVLRDNIQ	1	2	489
HIST1H4A	H4	P62805	6p22.2	K20-m2	11.24	CENP-T_C	GGAKRHRKVLRDNIQ	1	2	1
HIST1H4A	H4	P62805	6p22.2	K20-m2	11.24	CENP-T_C	GGAKRHRKVLRDNIQ	1	2	30
HIST1H4A	H4	P62805	6p22.2	K20-m2	11.24	CENP-T_C	GGAKRHRKVLRDNIQ	1	2	541
HIST1H4A	H4	P62805	6p22.2	K20-m2	11.24	CENP-T_C	GGAKRHRKVLRDNIQ	1	2	570
HIST1H4A	H4	P62805	6p22.2	K20-m2	11.24	CENP-T_C	GGAKRHRKVLRDNIQ	1	2	1
HIST1H4A	H4	P62805	6p22.2	K20-m2	11.24	CENP-T_C	GGAKRHRKVLRDNIQ	1	2	21
HIST1H4A	H4	P62805	6p22.2	K20-m2	11.24	CENP-T_C	GGAKRHRKVLRDNIQ	1	2	208
HIST1H4A	H4	P62805	6p22.2	K20-m2	11.24	CENP-T_C	GGAKRHRKVLRDNIQ	1	2	400
HIST1H4A	H4	P62805	6p22.2	K20-m2	11.24	CENP-T_C	GGAKRHRKVLRDNIQ	1	2	420
HIST1H4A	H4	P62805	6p22.2	K20-m2	11.24	CENP-T_C	GGAKRHRKVLRDNIQ	1	2	1
HIST1H4A	H4	P62805	6p22.2	K20-m2	11.24	CENP-T_C	GGAKRHRKVLRDNIQ	1	2	30
HIST1H4A	H4	P62805	6p22.2	K20-m2	11.24	CENP-T_C	GGAKRHRKVLRDNIQ	1	2	541
HIST1H4A	H4	P62805	6p22.2	K20-m2	11.24	CENP-T_C	GGAKRHRKVLRDNIQ	1	2	570
MICALL1	MIRab13	Q8N3F8	22q13.1	K670-m1	93.44		GHGFPLIKRKVQADQ	1	5	446
IL26	IL26	Q9NPH9	12q15	K62-m1	19.84	IL10	TIPEDRIKNIRLLKK	1	5	17
EHMT2	EHMT2	Q96KQ7	6p21.33	K185-m1	132.37		PKVHRARKTMSKPGN	1	3	276
IGHG2	IGHG2	P01859	14q32.33	K196-m1	35.9	C1-set	HQDWLNGKEYKCKVS	1	5	12
LLGL1	LLGL1	Q15334	17p11.2	K657-m1	115.42		LSRVKSLKKSLRQSF	1	5	298
MAP2K4	MKK4	P45985	17p12	K42-m1	44.29		SSMQGKRKALKLNFA	1	5	447
IGF2BP2	IGF2BP2	Q9Y6M1	3q27.2	K77-m1	66.12		EVDYSVSKKLRSRKI	1	5	9
MAP2K4	MKK4	P45985	17p12	K54-m1	44.29		NFANPPFKSTARFTL	1	5	449
IGF2BP2	IGF2BP2	Q9Y6M1	3q27.2	K78-m1	66.12		VDYSVSKKLRSRKIQ	1	5	10
LIN9	LIN9 iso5	Q8IWQ1	1q42.12	K143-m1	60.07		HRGGQPLKKRRGSSK	1	5	293
PHACTR4	PHACTR4	Q8IZ21	1p35.3	K32-m1	78.21		GDTTPPTKRKSKFSG	1	6	411
IGF2BP2	IGF2BP2	Q9Y6M1	3q27.2	K487-m1	66.12	KH_1	GPPEAQFKAQGRIFG	1	5	11
TTK	TTK	P33981	6q14.1	K19-m1	97.07		TIDSIMNKVRDIKNK	1	9	122
TTK	TTK	P33981	6q14.1	K385-m1	97.07		EVPESNQKQWQSKRK	1	9	123
NKAPD1	NKAPD1	Q6ZUT1	11q23.1	K204-m2	34.11	NKAP	RKGKQPHKRKKKSRK	1	6	148
RPS4X	RPS4X	P62701	Xq13.1	K7-m1	29.6	RS4NT	AMARGPKKHLKRVAA	1	7	544
PGAM1	PGAM1	P18669	10q24.1	K5-m1	28.8		AAAMAAYKLVLIRHG	1	6	401
RPS3A	RPS3A	P61247	4q31.3	K27-m1	29.94	Ribosomal_S3Ae	KVVDPFSKKDWYDVK	1	7	542
SLC25A4	SLC25A4	P12235	4q35.1	K52-m1	33.06	Mito_carr	ISAEKQYKGIIDCVV	1	8	215
ELP1	IKBKAP	O95163	9q31.3	K474-m1	150.25	IKI3	AVGGSGFKVCLRTPH	1	5	14
PRR12	PRR12	Q9ULL5	19q13.33	K1665-m2	211.04		YVRVCARKPWHRPPV	0	7	199
PRR12	PRR12	Q9ULL5	19q13.33	K1656-m2	211.04		FLENVNKKDYVRVCA	0	7	198
PPP1R14B	PPP1R14B	Q96C90	11q13.1	K59-m1	15.91	PP1_inhibitor	RQGKVTVKYDRKELR	0	7	149
PRR12	PRR12	Q9ULL5	19q13.33	K1163-m1	211.04		GRKPTKAKRDGPPRP	0	7	197
PPP1R14A	PPP1R14A	Q96A00	19q13.2	K40-m1	16.69	PP1_inhibitor	RHARVTVKYDRRELQ	0	7	148
PPWD1	PPWD1	Q96BP3	5q12.3	K444-m1	73.57		TIVCTSFKKNRFYMF	0	7	155
PRR14L	PRR14L	Q5THK1	22q12.2	K1551-m1	237.3		IRSSAFLKSSSNPIP	0	7	200
PRR3	PRR3	P79522	6p21.33	K125-m1	20.64		PTRGSFHKEQRNPRR	0	7	201
PPP1R26	PPP1R26	Q5T8A7	9q34.3	K265-m1	127.35	PPP1R26_N	NSAKSLLKSHQEPPT	0	7	150
PPP1R13L	PPP1R13L	Q8WUF5	19q13.32	K522-m1	89.09		AEIPRPLKRRGSMEQ	0	7	146
PPP1R14A	PPP1R14A	Q96A00	19q13.2	K32-m1	16.69	PP1_inhibitor	GSPGGLQKRHARVTV	0	7	147
PPP1R13B	PPP1R13B	Q96KQ4	14q32.33	K707-m1	119.57		NAPRPLKKRSSITEP	0	7	143
PPP2R5E	PPP2R5E	Q16537	14q23.2	K449-m2	54.7	B56	EREELWKKLEDLELK	0	7	154
PPP1R13L	PPP1R13L	Q8WUF5	19q13.32	K87-m1	89.09		GSRGSPRKAATDGAD	0	7	144
PPP1R13L	PPP1R13L	Q8WUF5	19q13.32	K314-m1	89.09		ATLPRNYKVSPLASD	0	7	145
PPP2R3A	PPP2R3A	Q06190	3q22.2-q22.3	K535-m1	130.28		REPLAKGKNSNFLNS	0	7	153
PROCA1	PROCA1	Q8NCQ7	17q11.2	K244-m1	40.52		KKKKEKEKDKEEMDE	0	7	180
PRR12	PRR12	Q9ULL5	19q13.33	K1161-m1	211.04		RRGRKPTKAKRDGPP	0	7	196
PRDX2	PRDX2	P32119	19p13.13	K191-m1	21.89	1-cysPrx_C	KPNVDDSKEYFSKHN	0	7	167
PRDX4	PRDX4	Q13162	Xp22.11	K250-m1	30.54	1-cysPrx_C	EVCPAGWKPGSETII	0	7	168
PRDX6	PRDX6	P30041	1q25.1	K63-m1	25.03	AhpC-TSA	KLAPEFAKRNVKLIA	0	7	169
PRPF38A	PRPF38A	Q8NAV1	1p32.3	K7-m1	37.48		AMANRTVKDAHSIHG	0	7	186
PRDX6	PRDX6	P30041	1q25.1	K182-m1	25.03	1-cysPrx_C	VATPVDWKDGDSVMV	0	7	170
HELZ2	PRIC285	Q9BYK8	20q13.33	K1196-m1	294.65		GRVLGVLKRKRHELA	0	7	171
HELZ2	PRIC285	Q9BYK8	20q13.33	K1564-m1	294.65	RNB	APRSQQLKALCEKHG	0	7	172
PRKCSH	PRKCSH	P14314	19p13.2	K83-m1	59.43	PRKCSH-like	HCTNTGYKPLYIPSN	0	7	173
PRKRIP1	PRKRIP1	Q9H875	7q22.1	K15-m1	21		SVRPPRPKKEPQTLV	0	7	174
PRPF31	PRPF31	Q8WWY3	19q13.42	K438-m1	55.46	Prp31_C	QSVVYGGKSTIRDRS	0	7	185
PRLR	PRLR iso4	P16471-4	5p13.2	K357-m1	42.64		LKSYRPRKISSQGRL	0	7	175
PRLR	PRLR iso4	P16471-4	5p13.2	K369-m1	42.64		GRLAVFTKATLTTVQ	0	7	176
PRPF3	PRPF3	O43395	1q21.2	K361-m1	77.53	PRP3	EISQAARKTGIHTST	0	7	184
PRMT3	PRMT3	O60678	11p15.1	K81-m2	59.9		NIDSMVHKHGLEFYG	0	7	177
PPP1R13B	PPP1R13B	Q96KQ4	14q32.33	K382-m1	119.57		NAAHGRSKSANDGNW	0	7	141
PRMT6	PRMT6	Q96LA8	1p13.3	K40-m1	41.94		LERPRRTKRERDQLY	0	7	178
PRPF3	PRPF3	O43395	1q21.2	K294-m1	77.53		AVKREQFKQQLKEKP	0	7	183
PRPF4B	PRP4	Q13523	6p25.2	K505-m1	116.99		KVKEDKFKGSLSEGM	0	7	182
PRPF6	PRPF6	O94906	20q13.33	K146-m1	106.92	PRP1_N	QQQFSDLKRKLAEVT	0	7	187
PRDX1	PRDX1	Q06830	1p34.1	K192-m1	22.11	1-cysPrx_C	KPDVQKSKEYFSKQK	0	7	166
PRR11	PRR11	Q96HE9	17q22	K220-m1	40.09		ALQAGPLKKDGPMQI	0	7	195
PRDX1	PRDX1	Q06830	1p34.1	K178-m1	22.11	1-cysPrx_C	EVCPAGWKPGSDTIK	0	7	165
PPWD1	PPWD1	Q96BP3	5q12.3	K445-m1	73.57		IVCTSFKKNRFYMFT	0	7	156
PRR11	PRR11	Q96HE9	17q22	K212-m1	40.09		LRKPSLAKALQAGPL	0	7	194
PQBP1	PQBP1	O60828	Xp11.23	K191-m1	30.47		LAPYPKSKKAVSRKD	0	7	157
PGR	PR	P06401	11q22.1	K464-m1	98.98	Prog_receptor	TLECILYKAEGAPPQ	0	7	158
PRAMEF15	PRAMEF15	Q5VWM5	1p36.21	K185-m1	55.42		DLLHLCCKKLKILGM	0	7	159
PRPS2	PRPS2	P11908	Xp22.2	K163-m1	34.77		RENIAEWKNCIIVSP	0	7	193
PRPF8	PRPF8	Q6P2Q9	17p13.3	K1517-m3	273.6	U6-snRNA_bdg	EESMKWKKLTNAQRS	0	7	192
PRPF8	PRPF8	Q6P2Q9	17p13.3	K1516-m3	273.6	U6-snRNA_bdg	FEESMKWKKLTNAQR	0	7	191
AKT1S1	PRAS40	Q96B36	19q13.33	K251-m1	27.38	PRAS	LNTSDFQKLKRKYAA	0	7	160
PRCC	PRCC	Q92733	1q23.1	K225-m1	52.42		SRLASKTKTSSLAPV	0	7	161
PRDM12	PRDM12	Q9H4Q4	9q34.12	K269-m3	40.4		MRIHTLDKPFVCRFC	0	7	162
PRPF8	PRPF8	Q6P2Q9	17p13.3	K1443-m1	273.6	U6-snRNA_bdg	WRVRTDFKQYQVLKQ	0	7	190
PRMT7	PRMT7	Q9NVM4	16q22.1	K444-m1	78.46		KLLRKIFKANHLEDK	0	7	179
PRPF8	PRPF8	Q6P2Q9	17p13.3	K1425-m3	273.6		RINTLFQKDRHTLAY	0	7	189
PRDX1	PRDX1	Q06830	1p34.1	K16-m1	22.11	AhpC-TSA	GHPAPNFKATAVMPD	0	7	163
PRDX1	PRDX1	Q06830	1p34.1	K27-m1	22.11	AhpC-TSA	VMPDGQFKDISLSDY	0	7	164
PRPF8	PRPF8	Q6P2Q9	17p13.3	K1020-m1	273.6	RRM_4	NNVVINYKDMNHTNS	0	7	188
PPP1R13B	PPP1R13B	Q96KQ4	14q32.33	K393-m1	119.57		DGNWPTLKQNSSSSV	0	7	142
YWHAB	14-3-3 beta	P31946	20q13.12	K51-m1	28.08	2014-03-03	NLLSVAYKNVVGARR	0	1	2
PPP1CC	PPP1CC	P36873	12q24.11	K322-m1	36.98		GMITKQAKKAAAAAA	0	7	140
PIP4K2A	PIP4K2A	P48426	10p12.2	K89-m1	46.22		ENMPSHFKFKEYCPM	0	7	39
PITPNB	PITPNB	P48739	22q12.1	K104-m1	31.54	IP_trans	IVTNEYMKDDFFIKI	0	7	45
PIP5K1B	PIP5K1B	O14986	9q21.11	K301-m3	61.04	PIP5K	AKRTGMQKVLYSTAM	0	7	44
PIP5K1A	PIP5K1A	Q99755	1q21.3	K86-m1	62.63		KTTSSALKGAIQLGI	0	7	43
PIP4K2C	PIP4K2C	Q8TBX8	12q13.3	K99-m1	47.3		ENLPSHFKFKEYCPQ	0	7	42
PIP4K2A	PIP4K2A	P48426	10p12.2	K375-m1	46.22	PIP5K	KKAAHAAKTVKHGAG	0	7	41
PIP4K2A	PIP4K2A	P48426	10p12.2	K91-m1	46.22		MPSHFKFKEYCPMVF	0	7	40
PINX1	PINX1	Q96BK5	8p23.1	K252-m1	37.03		AQERVAKKKSAPAEE	0	7	38
PRKAR2A	PKAR2A	P13861	3p21.31	K315-m1	45.52	cNMP_binding	ILIRSRTKSNKDGGN	0	7	47
PIKFYVE	PIKFYVE	Q9Y2I7	2q34	K43-m1	237.14		DQDEPPFKSAYSSFV	0	7	37
PI4KB	PIK4CB	Q9UBF8	1q21.3	K290-m2	91.38		ISLSSNLKRTASNPK	0	7	36
PIK3R3	PIK3R3 iso3	B4DXM8	1p34.1	K329-m2	59.41	PI3K_P85_iSH2	RLEQDLKKQALDNRE	0	7	35
PIK3R3	PIK3R3 iso3	B4DXM8	1p34.1	K328-m2	59.41	PI3K_P85_iSH2	MRLEQDLKKQALDNR	0	7	34
PIK3CB	PIK3CB	P42338	3q22.3	K747-m1	122.76		EAMHTCLKQSAYREA	0	7	33
PIK3C3	PIK3C3	Q8NEB9	18q12.3	K613-m1	101.55		PETATLFKSALMPAQ	0	7	32
PJA2	PJA2	O43164	5q21.3	K46-m1	78.21		RHAYVSFKPCMTRHE	0	7	46
PRKG2	PKG2	Q13237	4q21.21	K521-m2	87.43	Pkinase	VKLYRTFKDNKYVYM	0	7	48
PIK3C3	PIK3C3	Q8NEB9	18q12.3	K36-m1	101.55		KREQKSYKAVLEDPM	0	7	29
PKP2	plakophilin 2	Q99959	12p11.21	K112-m1	97.41		PKTYDMLKAGTTATY	0	7	57
PLD2	PLD2	O14939	17p13.2	K388-m1	105.99		WRLDIMLKRKAEEGV	0	7	65
PLD2	PLD2	O14939	17p13.2	K292-m1	105.99		SHRSLILKCSSYRQA	0	7	64
PLCH1	PLCH1	Q4KWH8	3q25.31	K1391-m1	189.22		LASPLKLKYNQGVVE	0	7	61
PLCE1	PLCE1	Q9P212	10q23.33	K1555-m1	258.71		PVDILKQKAHQLASM	0	7	60
PLCE1	PLCE1	Q9P212	10q23.33	K1541-m1	258.71	PI-PLC-X	KVLLKNKKLKAHQTP	0	7	59
PKP4	plakophilin 4	Q99569	2q24.1	K982-m1	131.87		RSSLKVVKAAAQVLN	0	7	58
PKP2	plakophilin 2	Q99959	12p11.21	K52-m1	97.41		GRGGQTVKSLRIQEQ	0	7	56
PKLR	PKLR	P30613	1q22	K290-m1	61.83	PK	VFASFVRKASDVAAV	0	7	49
PKP2	plakophilin 2	Q99959	12p11.21	K39-m1	97.41		LPSEAKLKLAGSSGR	0	7	55
PKP1	plakophilin 1	Q13835	1q32.1	K7-m1	82.86		AMNHSPLKTALAYEC	0	7	54
EIF2AK2	PKR	P19525	2p22.2	K69-m1	62.09	dsrm	EAKNAAAKLAVEILN	0	7	53
EIF2AK2	PKR	P19525	2p22.2	K61-m1	62.09	dsrm	EGEGRSKKEAKNAAA	0	7	52
PKN2	PKN2	Q16513	1p22.2	K376-m1	112.03		MSRTSKSKSGSSRNL	0	7	51
PKM	PKM	P14618	15q23	K3-m3	57.94		AAAAAMSKPHSEAGT	0	7	50
PIK3C3	PIK3C3	Q8NEB9	18q12.3	K287-m1	101.55	PI3Ka	GPSDHDLKPNAATRD	0	7	31
PIK3C2A	PIK3C2A	O00443	11p15.1	K613-m1	190.68		AVNLPRSKTADVTSL	0	7	28
PPP1CA	PPP1CA	P62136	11q13.2	K329-m1	37.51		PRNSAKAKKAAAAAA	0	7	139
PHF19	PHF19	Q5T6S3	9q33.2	K476-m1	65.59		TVGSRKRKLAAKAYM	0	6	417
PHF3	PHF3	Q92576	6q12	K858-m1	229.48		WQLAPLRKMGQPVLP	0	7	8
PHF3	PHF3	Q92576	6q12	K159-m1	229.48		AAPLSNTKKASGKTV	0	7	7
INTS12	PHF22	Q96CB8	4q24	K433-m1	48.81		SSPSASLKGPTSQES	0	7	6
INTS12	PHF22	Q96CB8	4q24	K419-m1	48.81		PSGSTTSKTTSESSS	0	7	5
INTS12	PHF22	Q96CB8	4q24	K122-m1	48.81		PKKPRLEKPETQSSP	0	7	4
PHF20L1	PHF20L1	A8MW92	8q24.22	K75-m1	115.01		LERPALRKEGLKDEE	0	7	3
PHF19	PHF19	Q5T6S3	9q33.2	K162-m1	65.59		RKGGALKKGAIARTL	0	6	416
PHF3	PHF3	Q92576	6q12	K1917-m1	229.48		DRPFNRGKGDRQRFY	0	7	10
PHF10	PHF10	Q8WUB8	6q27	K347-m1	56.05		FQGRQKSKDKAATPR	0	6	415
PHF10	PHF10	Q8WUB8	6q27	K206-m1	56.05		YIKKAAKKAAEFNSN	0	6	414
PHB	PHB	P35232	17q21.33	K11-m1	29.8		KVFESIGKFGLALAV	0	6	413
PHB	PHB	P35232	17q21.33	K4-m1	29.8		AAAAMAAKVFESIGK	0	6	412
PHACTR2	PHACTR2	O75167	6q24.2	K31-m1	69.7		QTPPFKRKGKLSTIG	0	6	410
PHACTR2	PHACTR2	O75167	6q24.2	K29-m1	69.7		GSQTPPFKRKGKLST	0	6	409
PHF3	PHF3	Q92576	6q12	K1809-m1	229.48		QPNLQHLKSSPPGFP	0	7	9
PHF6	PHF6	Q8IWS0	Xq26.2	K169-m1	41.29		SRKGRPRKTNFKGLS	0	7	11
PIK3C2A	PIK3C2A	O00443	11p15.1	K280-m2	190.68		LDPLSKPKVDNVEVL	0	7	27
PI4K2A	PI4K2A	Q9BTU6	10q24.2	K240-m1	54.02	PI3_PI4_kinase	GKRLALEKVPKVGQR	0	7	20
PIGN	PIGN	O95427	18q21.33	K404-m3	105.81		KQFNILRKARSYIKH	0	7	26
ERCC6L	PICH	Q2NKX8	Xq13.1	K1156-m1	141.1		ETLSSENKSSWLMTS	0	7	25
ERCC6L	PICH	Q2NKX8	Xq13.1	K55-m1	141.1		KDIFPNEKVLSRIQK	0	7	24
ERCC6L	PICH	Q2NKX8	Xq13.1	K48-m1	141.1		FKLFNLAKDIFPNEK	0	7	23
PCLO	piccolo	Q9Y6V0	7q21.11	K1459-m2	553.28		NSPVPQRKRRTSVGS	0	7	22
PI4K2A	PI4K2A	Q9BTU6	10q24.2	K243-m1	54.02	PI3_PI4_kinase	LALEKVPKVGQRFNR	0	7	21
PHRF1	PHRF1	Q9P1Y6	11p15.5	K556-m1	178.67		SRGEEGFKGCLQPRA	0	7	19
PHF6	PHF6	Q8IWS0	Xq26.2	K173-m1	41.29		RPRKTNFKGLSEDTR	0	7	12
PHLPP2	PHLPP2	Q6ZVD8	16q22.2	K1066-m1	146.75		TTIKDAPKPATPSSS	0	7	18
PHLDB2	PHLDB2	Q86SQ0	3q13.2	K240-m1	142.16		NINLRTRKYSSSSLS	0	7	17
PHLDB2	PHLDB2	Q86SQ0	3q13.2	K50-m1	142.16		YSSSLRFKANGDYSG	0	7	16
PHLDA3	PHLDA3	Q9Y5J5	1q32.1	K106-m1	13.89		TLGLVKFKNQQAIQT	0	7	15
PHKG1	PHKG1	Q16816	7p11.2	K304-m1	45.02		RHFSPRGKFKVIALT	0	7	14
PHF8	PHF8	Q9UPP1	Xp11.22	K244-m1	117.86		SNLVETPKIVRKLSW	0	7	13
PLEC	Plectin-1	Q15149	8q24.3	K915-m1	531.79		KEQLNEYKGHLSGLA	0	7	66
PLEC	Plectin-1	Q15149	8q24.3	K926-m1	531.79		SGLAKRAKAVVQLKP	0	7	67
PLEC	Plectin-1	Q15149	8q24.3	K977-m1	531.79		PAQPSHWKVLSSSGS	0	7	68
PBRM1	polybromo 1	Q86U86	3p21.1	K1654-m1	192.95		RLPSHWLKSKGAHTT	0	7	113
POT1	POT1	Q9NUX5	7q31.33	K353-m1	71.44		TPLCAILKQKAPQQY	0	7	119
POR	POR	P16435	7q11.23	K267-m1	76.69		MGEMGRLKSYENQKP	0	7	118
POP7	POP7	O75817	7q22.1	K46-m1	15.65	Rpp20	VNMKTDFKAQLARCQ	0	7	117
POP4	POP4	O95707	19q12	K36-m2	25.42		AFVRAFLKRSTPRMS	0	7	116
POP4	POP4	O95707	19q12	K2-m1	25.42		AAAAAAMKSVIYHAL	0	7	115
POM121	POM121	Q96HA1	7q11.23	K428-m1	127.72	POM121	RGISQLWKRNGPSSS	0	7	114
PBRM1	polybromo 1	Q86U86	3p21.1	K329-m2	192.95		EERNPTSKYYRNKRA	0	7	112
POU6F1	POU6F1	Q14863	12q13.13	K236-m2	32.65	Homeobox	GEPSKKRKRRTSFTP	0	7	122
POLRMT	POLRMT	O00411	19p13.3	K28-m1	138.62		GRPGLPGKEGTAGGV	0	7	111
POLR3E	POLR3E	Q9NVU0	16p12.2	K467-m1	79.9		RIQVAKTKAQQNHAL	0	7	110
POLR3E	POLR3E	Q9NVU0	16p12.2	K465-m1	79.9		DQRIQVAKTKAQQNH	0	7	109
PRR30	PRR30	Q53SZ7	2p23.3	K398-m1	44.69	DUF4679	PRPCPGPKRPVSLEL	0	7	203
POLR3B	POLR3B	Q9NW08	12q23.3	K1013-m1	127.78	RNA_pol_Rpb2_6	PVYYQKLKHMVLDKM	0	7	108
POLR3B	POLR3B	Q9NW08	12q23.3	K859-m1	127.78	RNA_pol_Rpb2_6	KDVPITYKGATDSYI	0	7	107
POTEE	POTE2	Q6S8J3	2q21.1	K768-m1	121.36	Actin	KRGILTLKYPMEHGI	0	7	120
PPIA	PPIA	P62937	7p13	K49-m1	18.01	Pro_isomerase	GEKGFGYKGSCFHRI	0	7	123
PLEC	Plectin-1	Q15149	8q24.3	K4480-m1	531.79	Plectin	VNKGLVDKIMVDRIN	0	7	69
PPIE	PPIE	Q9UNP9	1p34.2	K254-m1	33.43	Pro_isomerase	QFFLTCDKTDWLDGK	0	7	132
PPM1G	PPM1G	O15355	2p23.3	K406-m1	59.27	PP2C	AIGDHFYKRNKNLPP	0	7	138
PPM1D	PPM1D	O15297	17q23.2	K535-m1	66.68		RTPPTNFKRTLEESN	0	7	137
PPIP5K2	PPIP5K2	O43314	5q21.1	K1201-m1	140.41		PATLKSTKASSKPAT	0	7	136
PPIP5K2	PPIP5K2	O43314	5q21.1	K1198-m1	140.41		PTPPATLKSTKASSK	0	7	135
PPIL4	PPIL4	Q8WUA2	6q25.1	K460-m1	57.23		YSNSHKSKYQTDLYE	0	7	134
PPIF	PPIF	P30405	10q22.3	K190-m1	22.04	Pro_isomerase	KIESFGSKSGRTSKK	0	7	133
PPIE	PPIE	Q9UNP9	1p34.2	K185-m1	33.43	Pro_isomerase	HEKGFGFKGSSFHRI	0	7	131
PPIA	PPIA	P62937	7p13	K91-m1	18.01	Pro_isomerase	EDENFILKHTGPGIL	0	7	124
PPID	PPID	Q08752	4q32.1	K235-m1	40.76	TPR_7	NIGNTFFKSQNWEMA	0	7	130
PPIC	PPIC	P45877	5q23.2	K123-m1	22.76	Pro_isomerase	TFPDENFKLKHYGIG	0	7	129
PPIB	PPIB	P23284	15q22.31	K129-m1	23.74	Pro_isomerase	RFPDENFKLKHYGPG	0	7	128
PPIAL4C	PPIAL4C	A0A0B4J2A2	1q21.2	K91-m1	18.16	Pro_isomerase	DDENLIRKHTGSGIL	0	7	127
PPIAL4A	PPIAL4A	Q9Y536	1q21.2	K125-m2	18.18	Pro_isomerase	KTEWLDGKHVAFGKV	0	7	126
PPIA	PPIA	P62937	7p13	K125-m1	18.01	Pro_isomerase	KTEWLDGKHVVFGKV	0	7	125
POLR3A	POLR3A	O14802	10q22.3	K3-m1	155.64		AAAAAMVKEQFRETD	0	7	106
POLR2B	POLR2B	P30876	4q12	K1052-m1	133.9	RNA_pol_Rpb2_6	PTYYQRLKHMVDDKI	0	7	105
POLR2B	POLR2B	P30876	4q12	K730-m1	133.9	RNA_pol_Rpb2_6	TYQSAMGKQAMGVYI	0	7	104
PLS3	PLS3	P13797	Xq23	K545-m1	70.81	CH	STSIQSFKDKTISSS	0	7	77
PMS1	PMS1	P54277	2q32.2	K626-m1	105.83	HMG_box	KYEEKATKDLERYNS	0	7	83
PMS1	PMS1	P54277	2q32.2	K505-m1	105.83		WSRGNILKNSVGENI	0	7	82
PML	PML	P29590	15q24.1	K727-m1	97.55		GASSFKLKNLAQTYL	0	7	81
PML	PML	P29590	15q24.1	K725-m1	97.55		VPGASSFKLKNLAQT	0	7	80
ZBTB16	PLZF	Q05516	11q23.2	K396-m2	74.27		GELAVGMKSESRTIG	0	7	79
ZBTB16	PLZF	Q05516	11q23.2	K387-m2	74.27		IQRELFSKLGELAVG	0	7	78
PLS3	PLS3	P13797	Xq23	K444-m1	70.81	CH	KVPVDWSKVNKPPYP	0	7	76
POLR2B	POLR2B	P30876	4q12	K445-m1	133.9		RIISDGLKYSLATGN	0	7	103
PLK2	PLK2	Q9NYY3	5q11.2	K366-m1	78.24		PAKNFFKKAAAALFG	0	7	75
PLEKHN1	PLEKHN1	Q494U1	1p36.33	K25-m1	66.41		FSRKPSLKGNREDSA	0	7	74
PLEKHH2	PLEKHH2	Q8IVE3	2p21	K226-m1	168.23		EPEFTEGKDMEEMEI	0	7	73
PLEKHG3	PLEKHG3	A1L390	14q23.3	K406-m1	134.41		ATIPQKAKEAILEMD	0	7	72
PLEKHA6	PLEKHA6	Q9Y2H5	1q32.1	K41-m1	117.13		RATRTARKAVAFGKR	0	7	71
PLEKHA1	PLEKHA1	Q9HB21	10q26.13	K173-m1	45.55		SIDRNNLKRSQSHLP	0	7	70
PNN	PNN	Q9H307	14q21.1	K157-m1	81.61	Pinin_SDK_memA	MGTLQKFKQESTVAT	0	7	84
PNPT1	PNPT1	Q8TCS8	2p16.1	K569-m1	85.95		KLPGIPIKIVMEAIQ	0	7	85
PPP1R10	PNUTS	Q96QC0	6p21.33	K244-m1	99.06		NLKPIPLKRQSNVAA	0	7	86
POF1B	POF1B iso1	Q8WVV4-1	Xq21.1	K138-m1	68.7		YPQTTIRKYVVQNPE	0	7	87
POGK	POGK	Q9P215	1q24.1	K304-m1	69.44	HTH_Tnp_Tc5	NIPEKGFKASLGWCR	0	7	88
POLA1	POLA	P09884	Xp22.11-p21.3	K1434-m1	165.91	zf-DNA_Pol	LQDYRKLKNTAEQFL	0	7	89
POLD3	POLD3	Q15054	11q13.4	K248-m1	51.4	CDC27	KAAMNKFKVNLDSEQ	0	7	90
POLR1A	POLR1A	O95602	2p11.2	K5-m1	194.81		AAAMLISKNMPWRRL	0	7	93
POLR1A	POLR1A	O95602	2p11.2	K1049-m1	194.81	RNA_pol_Rpb1_5	SNYEVIMKSQHLHEV	0	7	94
POLR1B	POLR1B	Q9H9Y6	2q14.1	K17-m1	128.23		LPSGPSLKHLTDPSY	0	7	95
POLR1B	POLR1B	Q9H9Y6	2q14.1	K693-m1	128.23	RNA_pol_Rpb2_6	MYQCQMGKQTMGFPL	0	7	96
POLR1B	POLR1B	Q9H9Y6	2q14.1	K863-m1	128.23	RNA_pol_Rpb2_6	SNDTGSGKFKCVCIT	0	7	97
POLR1E	POLR1E	Q9GZS1	9p13.2	K80-m1	47.26	RNA_pol_I_A49	NFGTGALKCNTLCRH	0	7	98
POLR1E	POLR1E	Q9GZS1	9p13.2	K295-m1	47.26	RNA_pol_I_A49	AHRVVKRKSALGPGV	0	7	99
POLR2A	POLR2A	P24928	17p13.1	K708-m1	217.18		DIQNTIKKAKQDVIE	0	7	100
POLR2A	POLR2A	P24928	17p13.1	K767-m1	217.18	RNA_pol_Rpb1_4	LSEYNNFKSMVVSGA	0	7	101
POLR2A	POLR2A	P24928	17p13.1	K803-m1	217.18	RNA_pol_Rpb1_4	KRIPFGFKHRTLPHF	0	7	102
PRR30	PRR30	Q53SZ7	2p23.3	K390-m1	44.69	DUF4679	KQVTTSLKPRPCPGP	0	7	202
PUS7L	PUS7L	Q9H0K6	12q12	K388-m1	80.7	TruD	SLRLGQLKGNHFDIV	0	7	244
PRRC1	PRRC1	Q96M27	5q23.2	K307-m1	46.7	NTPase_I-T	VGYAAGLKGAQERID	0	7	204
RFC1	RFC1	P35251	4p14	K323-m1	128.25		SSKLAIMKRKEESSY	0	7	385
ADARB1	RED1	P78563	21q22.3	K669-m1	80.76	A_deamin	GRASRLCKHALYCRW	0	7	372
REEP3	REEP3	Q6NUK4	10q21.3	K244-m1	29.26		EVRYGSLKYKVKKRP	0	7	373
RELL1	RELL1	Q8IUW5	4p14	K240-m3	29.34		VEHKSNQKERRSLMS	0	7	374
REPS1	REPS1	Q96D71	6q24.1	K471-m1	86.66		HMQEMELKRTGSDHT	0	7	375
DPF2	requiem	Q92785	11q13.1	K195-m1	44.16		KGVGSARKKLDASIL	0	7	376
DPF2	requiem	Q92785	11q13.1	K196-m1	44.16		GVGSARKKLDASILE	0	7	377
REV3L	REV3	O60673	6q21	K2868-m1	352.78	DNA_pol_B	DSCPAVSKILERSLK	0	7	378
REXO1	REXO1	Q8N1G1	19p13.3	K668-m1	131.51		RRISHLSKQGQEVEP	0	7	379
REXO1	REXO1	Q8N1G1	19p13.3	K771-m1	131.51		EPGGQQLKTRTLSGM	0	7	380
REXO1	REXO1	Q8N1G1	19p13.3	K884-m1	131.51	EloA-BP1	SAVPGLSKTSGRRVV	0	7	381
REXO1L1P	REXO1L1	Q8IX06	8q21.2	K490-m2	73.86		DGFVETFKKELSRDA	0	7	382
REXO4	REXO4	Q9GZR2	9q34.2	K3-m1	46.67		AAAAAMGKAKVPASK	0	7	383
REXO4	REXO4	Q9GZR2	9q34.2	K5-m1	46.67		AAAMGKAKVPASKRA	0	7	384
RFC1	RFC1	P35251	4p14	K645-m1	128.25		KDDGSSFKAALLSGP	0	7	386
RECQL4	RECQL4	O94761	8q24.3	K114-m1	133.08		QRLKANLKGTLQAGP	0	7	370
RFC3	RFC3	P40938	13q13.2	K7-m3	40.56		AMSLWVDKYRPCSLG	0	7	387
RFC4	RFC4	P35249	3q27.3	K6-m1	39.68		AAMQAFLKGTSISTK	0	7	388
RFWD3	RFWD3	Q6PCD5	16q23.1	K488-m1	85.09		MLSTANMKSSQYIPM	0	7	389
RFX5	RFX5	P48382	1q21.3	K361-m1	65.32		RLSSGALKVATLPLS	0	7	390
TRMT10C	RG9MTD1	Q7L0Y3	3q12.3	K71-m1	47.35		DKWKTTMKSSVQEEC	0	7	393
TRMT10C	RG9MTD1	Q7L0Y3	3q12.3	K315-m1	47.35	tRNA_m1G_MT	VIGSFVDKSMQPGTS	0	7	394
RGL1	RGL1 iso2	Q9NZL6-2	1q25.3	K17-m1	90.69		TQEVSKFKLSTKVES	0	7	395
RGL1	RGL1 iso2	Q9NZL6-2	1q25.3	K21-m1	90.69		SKFKLSTKVESTGHW	0	7	396
RGPD3	RGPD3	A6NKT7	2q12.2	K994-m1	197.49		GKKDLNFKGFSGAGE	0	7	397
RGPD4	RGPD4	Q7Z3J3	2q12.3	K1556-m1	197.29		IFSSEKSKPFAFGNS	0	7	398
RGPD4	RGPD4	Q7Z3J3	2q12.3	K1579-m1	197.29		FSFNASLKSNNSETS	0	7	399
RGS1	RGS1	Q08116	1q31.2	K13-m2	23.86		ISTPKLDKMPGMFFS	0	7	400
RGS1	RGS1	Q08116	1q31.2	K24-m1	23.86		MFFSANPKELKGTTH	0	7	401
RECQL5	RECQL5	O94762	17q25.1	K232-m1	108.86		LFYDVQFKELISDPY	0	7	371
RECQL4	RECQL4	O94761	8q24.3	K110-m1	133.08		PDYGQRLKANLKGTL	0	7	369
RGS11	RGS11	O94810	16p13.3	K37-m1	52.95	DEP	QDPDQGVKMRSQRLL	0	7	403
RBM33	RBM33	Q96EV2	7q36.3	K964-m1	129.99		QDTKPGVKRTVTHRT	0	7	351
RBM22	RBM22	Q9NW64	5q33.1	K149-m1	46.9		STSDMLLKLARTTPY	0	7	338
RBM22	RBM22	Q9NW64	5q33.1	K185-m1	46.9		ECPYRHEKPTDPDDP	0	7	339
RBM25	RBM25	P49756	14q24.2	K77-m1	100.19		DHPGLKAKENDENCG	0	7	340
RBM25	RBM25	P49756	14q24.2	K173-m1	100.19		KAQLDEWKAKKKASN	0	7	341
RBM26	RBM26	Q5T8P6	13q31.1	K705-m1	113.6		VYNPAALKAAQKTLL	0	7	342
RBM27	RBM27	Q9P2N5	5q32	K734-m2	118.72		GIQKMMSKPQTSGAY	0	7	343
RBM27	RBM27	Q9P2N5	5q32	K814-m1	118.72		HDVQEVLKKKQEAMK	0	7	344
RBM27	RBM27	Q9P2N5	5q32	K815-m1	118.72		DVQEVLKKKQEAMKL	0	7	345
RBM27	RBM27	Q9P2N5	5q32	K945-m1	118.72		ILPVGRGKTMSSQGR	0	7	346
RBM28	RBM28	Q9NW13	7q32.1	K473-m1	85.74		RERFELLKHQKLKDQ	0	7	347
RBM28	RBM28	Q9NW13	7q32.1	K705-m1	85.74		KPQINQWKQEKQQLS	0	7	348
RBM28	RBM28	Q9NW13	7q32.1	K755-m1	85.74		APLAKRSKWFDSAAA	0	7	349
RBM33	RBM33	Q96EV2	7q36.3	K302-m1	129.99		STERGRMKDHRPALL	0	7	350
RBM47	RBM47	A0AV96	4p14	K263-m2	64.1	RRM_1	ETTEDTIKKSFGQFN	0	7	352
RECQL	RECQL	P46063	12p12.1	K487-m1	73.46		KDSAFERKNITEYCR	0	7	368
RBM5	RBM5	P52756	3p21.31	K780-m1	92.15	G-patch	IEAQVRLKGAGLGAK	0	7	353
RBM5	RBM5	P52756	3p21.31	K787-m1	92.15	G-patch	KGAGLGAKGSAYGLS	0	7	354
RBM6	RBM6	P78332	3p21.31	K36-m1	128.64		DYPPPPLKSHAQERH	0	7	355
RBM7	RBM7	Q9Y580	11q23.2	K45-m2	30.5	RRM_1	KVKIPKDKDGKPKQF	0	7	356
RBM7	RBM7	Q9Y580	11q23.2	K199-m1	30.5		GTPSSQRKVRMNSYP	0	7	357
RBMX	RBMX	P38159	Xq26.3	K150-m1	42.33		SRGPLPVKRGPPPRS	0	7	358
RBMX	RBMX	P38159	Xq26.3	K217-m1	42.33	RBM1CTR	RDDGYSTKDSYSSRD	0	7	359
RBMXL1	RBMXL1	Q96E39	1p22.2	K86-m1	42.14		IKVEQATKPSFERGR	0	7	360
RBP3	RBP3	P10745	10q11.22	K1070-m3	135.36	Peptidase_S41	LVEHIWKKIMHTDAM	0	7	361
DMXL2	RC3	Q8TDJ6	15q21.2	K2602-m1	339.64		EPENTPFKSRDSSAF	0	7	362
RDH8	RDH8	Q9NYR8	19p13.2	K45-m1	33.76	adh_short	TMRDLGKKETLEAAA	0	7	364
RECQL	RECQL	P46063	12p12.1	K91-m1	73.46		QNVFKLEKFRPLQLE	0	7	366
RECQL	RECQL	P46063	12p12.1	K313-m1	73.46	Helicase_C	KLINGRYKGQSGIIY	0	7	367
RGS1	RGS1	Q08116	1q31.2	K164-m2	23.86	RGS	ESTAKKIKAPTPTCF	0	7	402
RHBDF2	RHBDL6	Q6PJF5	17q25.1	K120-m1	96.69		SLSQSIRKGAAQWFG	0	7	404
RBM20	RBM20	Q5T481	10q25.2	K1164-m1	134.36		PRTGFYCKLCGLFYT	0	7	336
RNF40	RNF40	O75150	16p11.2	K906-m1	113.68		EKESFNLKRAQEDIS	0	7	455
RNASE13	RNASE13	Q5GAN3	14q11.2	K80-m1	17.84	RnaseA	YVIHAPWKAIQKFCK	0	7	440
RNASEH2A	RNASEH2A	O75792	19p13.13	K221-m1	33.39	RNase_HII	PKTKAWLKEHVEPVF	0	7	441
RNF123	RNF123	Q5XPI4	3p21.31	K991-m1	148.51		TRLPHLLKTKLEDAN	0	7	442
RNF123	RNF123	Q5XPI4	3p21.31	K993-m1	148.51		LPHLLKTKLEDANLP	0	7	443
RNF169	RNF169	Q8NCN4	11q13.4	K420-m1	77.19		NLNRSLQKQTSYEAS	0	7	444
RNF20	RNF20	Q5VTR2	9q31.1	K610-m1	113.66		ERDSAKDKEKGKHDD	0	7	445
RNF20	RNF20	Q5VTR2	9q31.1	K614-m1	113.66		AKDKEKGKHDDGRKK	0	7	446
RNF20	RNF20	Q5VTR2	9q31.1	K769-m1	113.66		KLMSERIKSNQIHKL	0	7	447
RNF20	RNF20	Q5VTR2	9q31.1	K880-m1	113.66		EKDMFNFKRAQEDIS	0	7	448
RNF213	RNF213	Q63HN8	17q25.3	K307-m1	591.41		PATTPPFKTHCQEAE	0	7	449
RNF213	RNF213	Q63HN8	17q25.3	K4968-m1	591.41		VSRFLQGKPRLSLKG	0	7	450
RNF213	RNF213	Q63HN8	17q25.3	K4974-m1	591.41		GKPRLSLKGIPTLVY	0	7	451
RNF219	RNF219	Q5W0B1	13q31.1	K674-m1	81.12		RFGSSLFKMSSEMHS	0	7	453
RNMT	RNMT	O43148	18p11.21	K180-m1	54.84	Pox_MCEL	RNFNNWMKSVLIGEF	0	7	456
CARMIL2	RLTPR	Q6F5E8	16q22.1	K126-m1	154.69		FPRSTLGKLFRRPTP	0	7	438
RBM39	RNPC2	Q14498	20q11.22	K111-m1	59.38		FNSAIRGKIGLPHSI	0	7	457
RNPC3	RNPC3	Q96LT9	1p21.1	K48-m1	58.58	RRM_1	EEKEDLLKYFGAQSV	0	7	458
RNPC3	RNPC3	Q96LT9	1p21.1	K65-m1	58.58	RRM_1	LSDKGRLKHTAFATF	0	7	459
RNPS1	RNPS1	Q15287	16p13.3	K40-m1	34.21		DRSDEKSKDRSKDKG	0	7	460
PHAX	RNUXA	Q9H814	5q23.2	K169-m2	44.4		KESQEHTKDLDKELD	0	7	461
ROCK2	ROCK2	O75116	2p25.1	K1368-m1	160.9		SSPRTSMKIQQNQSI	0	7	462
RPA1	RPA1	P27694	17p13.3	K163-m1	68.14		SKAYGASKTFGKAAG	0	7	463
RPA1	RPA1	P27694	17p13.3	K167-m1	68.14		GASKTFGKAAGPSLS	0	7	464
RPA1	RPA1	P27694	17p13.3	K443-m1	68.14		GGSNTNWKTLYEVKS	0	7	465
RPL10	RPL10	P27635	Xq28	K170-m1	24.6		QKIHISKKWGFTKFN	0	7	466
RPL13	RPL13	P26373	16q24.3|17p11.2	K177-m1	24.26	Ribosomal_L13e	TEEEKNFKAFASLRM	0	7	467
RPL13	RPL13	P26373	16q24.3|17p11.2	K200-m1	24.26		GIRAKRAKEAAEQDV	0	7	468
RPL13A	RPL13A	P40429	19q13.33	K148-m1	23.58		LAHEVGWKYQAVTAT	0	7	469
URI1	RMP	O94763	19q12	K172-m1	59.83		IKCDFEFKAKHRIAH	0	7	439
RLF	RLF	Q13129	1p34.2	K1470-m1	217.95		QHVYYRHKDYYDDLF	0	7	437
RHOA	RHOA	P61586	3p21.31	K119-m1	21.77	Ras	IILVGNKKDLRNDEH	0	7	405
RIF1	RIF1	Q5UIP0	2q23.3	K519-m1	274.47		VTESGNKKEKPGSEV	0	7	419
RHOC	RHOC	P08134	1p13.2	K119-m1	22.01	Ras	IILVGNKKDLRQDEH	0	7	406
ARHGDIA	RhoGDI alpha	P52565	17q25.3	K52-m1	23.21	Rho_GDI	DESLRKYKEALLGRV	0	7	407
RHPN2	RHPN2	Q8IUC4	19q13.11	K651-m1	76.99		GTNKNRQKSASTLCL	0	7	408
RIBC1	RIBC1	Q8N443	Xp11.22	K296-m1	44.01	RIB43A	QEVQRSKKQAHRQAE	0	7	409
RIBC1	RIBC1	Q8N443	Xp11.22	K304-m1	44.01	RIB43A	QAHRQAEKTLDTEWK	0	7	410
RIC1	RIC1	Q4ADV7	9p24.1	K1148-m1	159.3		TVGEQLLKSQSADPF	0	7	411
ARHGAP44	RICH2	Q17R89	17p12	K3-m1	89.25	BAR	AAAAAMKKQFNRMRQ	0	7	412
RICTOR	RICTOR	Q6R327	5p13.1	K986-m1	192.22	RICTOR_V	KQGCDILKCHNWDAV	0	7	413
RICTOR	RICTOR	Q6R327	5p13.1	K1304-m1	192.22		PRRAQSLKAPSIATI	0	7	414
RICTOR	RICTOR	Q6R327	5p13.1	K1312-m1	192.22		APSIATIKSLADCNF	0	7	415
RICTOR	RICTOR	Q6R327	5p13.1	K1334-m1	192.22		AFGYATLKRLQQQRM	0	7	416
RICTOR	RICTOR	Q6R327	5p13.1	K1367-m1	192.22		FTDTITMKANSFESR	0	7	417
RIF1	RIF1	Q5UIP0	2q23.3	K43-m3	274.47	Rif1_N	RMTGEEGKEVITEIE	0	7	418
RIF1	RIF1	Q5UIP0	2q23.3	K521-m1	274.47		ESGNKKEKPGSEVLT	0	7	420
RLF	RLF	Q13129	1p34.2	K1156-m1	217.95		LKKHNYSKEKVLQLT	0	7	436
RIF1	RIF1	Q5UIP0	2q23.3	K1293-m1	274.47		RSSRRAGKAEQTGNK	0	7	421
RIF1	RIF1	Q5UIP0	2q23.3	K1721-m1	274.47		QTLECQHKRSRRVRR	0	7	422
RIF1	RIF1	Q5UIP0	2q23.3	K2367-m1	274.47		IYHEQQVKTRGLEEI	0	7	423
RIMS2	RIMS2	Q9UQ26	8q22.3	K56-m1	160.4		KKVKEEHKPQLTQWF	0	7	426
RIOK1	RIOK1	Q9BRS2	6p24.3	K411-m1	65.58		EIASQRTKEERSSQD	0	7	427
RIOK1	RIOK1	Q9BRS2	6p24.3	K426-m1	65.58		HVDEEVFKRAYIPRT	0	7	428
RIOK2	RIOK2	Q9BVS4	5q15	K531-m1	63.28		GEANIFTKQRRENMQ	0	7	429
AGFG1	RIP	P52594	2q36.3	K161-m1	58.26		TPEVKPLKSLLGDSA	0	7	430
NRIP1	RIP140	P48552	21q11.2-q21.1	K97-m1	126.94	NRIP1_repr_1	SEDWNAAKRKRLSDS	0	7	431
NRIP1	RIP140	P48552	21q11.2-q21.1	K850-m1	126.94	NRIP1_repr_4	EMALLESKNLCMVPK	0	7	432
RIPK2	RIPK2	O43353	8q21.3	K384-m1	61.19		AQDCYFMKLHHCPGN	0	7	433
RLF	RLF	Q13129	1p34.2	K1150-m1	217.95		ALLMHYLKKHNYSKE	0	7	434
RLF	RLF	Q13129	1p34.2	K1151-m1	217.95		LLMHYLKKHNYSKEK	0	7	435
RBM22	RBM22	Q9NW64	5q33.1	K139-m1	46.9		RPVGMLGKATSTSDM	0	7	337
RBM19	RBM19	Q9Y4C8	12q24.13-q24.21	K536-m1	107.33		AQKYNATKSQVFDHE	0	7	335
PRRC2C	PRRC2C	Q9Y520	1q24.3	K27-m1	316.91	BAT2_N	LSLFNTYKGKSLETQ	0	7	205
QRICH1	QRICH1	Q2TAL8	3p21.31	K247-m1	86.44		SVLQPVKKRKVDMPI	0	7	252
PUM3	PUM3	Q15397	9p24.2	K39-m1	73.58		SKTFPTRKVAKEGGP	0	7	238
PUM1	Pumilio-1	Q14671	1p35.2	K8-m1	126.47		MSVACVLKRKAVLWQ	0	7	239
PURB	Pur-beta	Q96QR8	7p13	K136-m1	33.24	PurA	RKYYLDLKENQRGRF	0	7	240
PURA	PURA	Q00577	5q31.3	K160-m1	34.91	PurA	RKYYMDLKENQRGRF	0	7	242
PUS7L	PUS7L	Q9H0K6	12q12	K264-m1	80.7		VETKSFSKMNCSAGN	0	7	243
PGM2	PGM2	Q96G03	4p14	K268-m2	68.28	PGM_PMM_II	SFVQSAFKAFDLVPP	0	6	407
PWP2	PWP2H	Q15269	21q22.3	K2-m1	102.45		AAAAAAMKFAYRFSN	0	7	245
PWP2	PWP2H	Q15269	21q22.3	K43-m1	102.45		RVTVFDLKNNKSDTL	0	7	246
PWP2	PWP2H	Q15269	21q22.3	K691-m1	102.45		IPLPGVRKGDMSSRH	0	7	247
PEX2	PXMP3	P28328	8q21.13	K84-m1	34.84	Pex2_Pex12	GQSVLNIKYKNDFSP	0	7	248
QARS	QARS	P47897	3p21.31	K254-m1	87.8	tRNA_synt_1c_R2	PHTMNLLKQHLEITG	0	7	249
QARS	QARS	P47897	3p21.31	K628-m1	87.8	tRNA-synt_1c_C	EEPEPGFKRLAWGQP	0	7	250
QDPR	QDPR	P09417	4p15.32	K109-m1	25.79	adh_short	KNCDLMWKQSIWTST	0	7	251
QSER1	QSER1	Q2KHR3	11p13	K281-m1	189.97		PPSTTKIKSCSTEQP	0	7	253
PTPRE	PTPRE	P23469	10q26.2	K237-m1	80.64	Y_phosphatase	IVMLTNLKERKEEKC	0	7	236
QSER1	QSER1	Q2KHR3	11p13	K1550-m1	189.97	DUF4211	RAMKETFKSYMELLV	0	7	254
QTRT2	QTRTD1	Q9H974	3q13.31	K2-m1	46.71		AAAAAAMKLSLTKVV	0	7	255
R3HDM2	R3HDM2	Q9Y2K5	12q13.3	K852-m1	107		RGKRQALKSASTDLG	0	7	256
RAB11A	RAB11A	P62491	15q22.31	K24-m1	24.39	Ras	IGDSGVGKSNLLSRF	0	7	257
RAB11FIP1	RAB11FIP1	Q6WKZ4	8p11.23	K308-m1	137.17		FLGGLRSKNDVLSRS	0	7	258
RAB11FIP2	RAB11FIP2	Q7L804	10q26.11	K387-m1	58.28		SDSPCDLKSPNAFSE	0	7	259
RAB11FIP5	RAB11FIP5	Q9BXF6	2p13.2	K232-m1	70.42		LGKMGKAKGFFLRNK	0	7	260
RAB37	RAB37	Q96AX2	17q25.1	K144-m1	24.82	Ras	VIMLLGNKADMSSER	0	7	261
RAB3IP	RAB3IP	Q96QF0	12q15	K462-m1	53.02		WEVMQLRKEMSLAKL	0	7	262
RAB41	RAB41	Q5JT25	Xq13.1	K145-m1	25.04	Ras	VIMLLGNKIDLDNKR	0	7	263
RABL3	RABL3	Q5HYI8	3q13.33	K231-m1	26.42		RFGAGTLKSLHYDAA	0	7	264
RAC1	RAC1	P63000	7p22.1	K123-m1	21.45	Ras	KLDLRDDKDTIEKLK	0	7	265
RAC1	RAC1	P63000	7p22.1	K130-m3	21.45	Ras	KDTIEKLKEKKLTPI	0	7	266
CAVIN1	PTRF	Q6NZI2	17q21.2	K312-m1	43.48	PTRF_SDPR	HVVYARSKTAVYKVP	0	7	237
PTPRE	PTPRE	P23469	10q26.2	K226-m1	80.64	Y_phosphatase	WRMVWEQKSATIVML	0	7	235
RACK1	RACK1	P63244	5q35.3	K12-m1	35.08	WD40	MTLRGTLKGHNGWVT	0	7	268
PSMA6	PSMA6	P60900	14q13.2	K30-m1	27.4	Proteasome_A_N	YQVEYAFKAINQGGL	0	7	219
PRRC2C	PRRC2C	Q9Y520	1q24.3	K29-m1	316.91	BAT2_N	LFNTYKGKSLETQKT	0	7	206
PRRC2C	PRRC2C	Q9Y520	1q24.3	K392-m1	316.91		VAKVPYGKGPSFNQE	0	7	207
PRRC2C	PRRC2C	Q9Y520	1q24.3	K435-m1	316.91		RPGPFPSKQQVADED	0	7	208
PRRC2C	PRRC2C	Q9Y520	1q24.3	K1172-m1	316.91		LPPRTYWKEARERDW	0	7	209
PRRC2C	PRRC2C	Q9Y520	1q24.3	K2129-m1	316.91		SLKNRKVKDAQQVEP	0	7	210
PRUNE2	PRUNE2	Q8WUY3	9q21.2	K2980-m1	340.64	CRAL_TRIO_2	PGLGWMKKCYQMIDR	0	7	211
PSAT1	PSAT1	Q9Y617	9q21.2	K333-m1	40.42	Aminotran_5	ELNMLSLKGHRSVGG	0	7	212
PSD	PSD	A5PKW4	10q24.32	K910-m1	109.54		QVRTHEAKLKAMASE	0	7	213
PSD	PSD	A5PKW4	10q24.32	K912-m1	109.54		RTHEAKLKAMASELR	0	7	214
SFPQ	PSF	P23246	1p34.3	K232-m1	76.15		STPGGHPKPPHRGGG	0	7	215
SFPQ	PSF	P23246	1p34.3	K279-m1	76.15		ISDSEGFKANLSLLR	0	7	216
SFPQ	PSF	P23246	1p34.3	K703-m1	76.15		EEYEGPNKKPRFAAA	0	7	217
PSMA1	PSMA1	P25786	11p15.2	K50-m1	29.56	Proteasome	HAVLVALKRAQSELA	0	7	218
PSMA6	PSMA6	P60900	14q13.2	K102-m1	27.4	Proteasome	RYEAANWKYKYGYEI	0	7	220
PTPN23	PTPN23	Q9H3S7	3p21.31	K613-m2	178.97	ALIX_LYPXL_bnd	LKKYDQLKVYLEQNL	0	7	234
PSMA7	PSMA7	O14818	20q13.33	K157-m1	27.89	Proteasome	SGTYHAWKANAIGRG	0	7	221
PSMA8	PSMA8	Q8TAA3	18q11.2	K165-m1	28.53	Proteasome	SGTYHAWKANAIGRS	0	7	222
PSMD11	PSMD11	O00231	17q11.2	K304-m1	47.46	PCI	RSLADFEKALTDYRA	0	7	223
PSMD3	PSMD3	O43242	17q21.1	K523-m1	60.98	Rpn3_C	QQDLEFAKEMAEDDD	0	7	224
PSME2	PSME2	Q9UL46	14q12	K3-m2	27.4		AAAAAMAKPCGVRLS	0	7	225
PSME3	PSME3	P61289	17q21.31	K110-m1	29.51	PA28_beta	VMPNGMLKSNQQLVD	0	7	226
PSME3	PSME3	P61289	17q21.31	K121-m1	29.51	PA28_beta	QLVDIIEKVKPEIRL	0	7	227
PSME3	PSME3	P61289	17q21.31	K212-m1	29.51	PA28_beta	TVTEIDEKEYISLRL	0	7	228
PSPC1	PSPC1	Q8WXF1	13q12.11	K519-m1	58.74		GNFEGPNKRRRYAAA	0	7	229
PSPH	PSPH	P78330	7p11.2	K59-m1	25.01	Hydrolase	MGGAVPFKAALTERL	0	7	230
ZFC3H1	PSRC2	O60293	12q21.1	K319-m3	226.36		GDKNRLKKVKDGAKP	0	7	231
ZFC3H1	PSRC2	O60293	12q21.1	K1287-m2	226.36		TTYKDKRKWKPKFWR	0	7	232
PTPN23	PTPN23	Q9H3S7	3p21.31	K608-m2	178.97	ALIX_LYPXL_bnd	LFEEQLKKYDQLKVY	0	7	233
RAC2	RAC2	P15153	22q13.1	K130-m3	21.43	Ras	KDTIEKLKEKKLAPI	0	7	267
RACK1	RACK1	P63244	5q35.3	K172-m1	35.08	WD40	IVSCGWDKLVKVWNL	0	7	269
RBM17	RBM17	Q96I25	10p15.1	K58-m1	44.96		LAPVIDLKRGGSSDD	0	7	334
RASAL1	RASAL1	O95294	12q24.13	K399-m1	90.02	RasGAP	RTRRISFKGALSEEQ	0	7	317
RANBP2	RANBP2	P49792	2q13	K1883-m1	358.2		GSSNTEFKSTKEGFS	0	7	304
RANBP2	RANBP2	P49792	2q13	K1969-m1	358.2		GKKDPNFKGFSGAGE	0	7	305
RANBP2	RANBP2	P49792	2q13	K2272-m1	358.2		TGFNFSFKSALSPSK	0	7	306
RANBP2	RANBP2	P49792	2q13	K2554-m1	358.2		FSFNAPLKSNNSETS	0	7	307
RANGAP1	RANGAP1	P46060	22q13.2	K406-m1	63.54	RanGAP1_C	QQRGQGEKSATPSRK	0	7	308
FAM208A	RAP140	Q9UK61	3p14.3	K360-m1	189.03		KYNYTLWKGQLLNKG	0	7	309
FAM208A	RAP140	Q9UK61	3p14.3	K586-m1	189.03		DSRLDDKKFLYSAPR	0	7	310
FAM208A	RAP140	Q9UK61	3p14.3	K711-m1	189.03		MRSKTVLKRKLEDLP	0	7	311
FAM208A	RAP140	Q9UK61	3p14.3	K1037-m1	189.03		RKIEEILKQKNVSYV	0	7	312
UIMC1	RAP80	Q96RL1	5q35.2	K245-m1	79.73		GRGSAFLKAVQGSGD	0	7	313
RAPH1	RAPH1	Q70E73	2q33.2	K129-m1	135.26		PVSRHTLKHGTLKGL	0	7	314
RAPH1	RAPH1	Q70E73	2q33.2	K134-m1	135.26		TLKHGTLKGLSSSSN	0	7	315
RARS	RARS	P54136	5q34	K143-m3	75.38	Arg_tRNA_synt_N	EIAENITKHLPDNEC	0	7	316
RASAL2	RASAL2	Q9UJF2	1q25.2	K662-m1	128.56	DUF3498	DSDLHKLKSPSQDNT	0	7	318
RANBP2	RANBP2	P49792	2q13	K1585-m1	358.2		VPAPASFKFGTSETS	0	7	302
RASAL2	RASAL2	Q9UJF2	1q25.2	K1135-m1	128.56		ITENGEFKNSSCAAA	0	7	319
RASSF4	RASSF4	Q9H2L5	10q11.21	K232-m1	36.75	RA	HESGERTKLKDCEYP	0	7	320
RAVER1	RAVER1	Q8IY67	19p13.2	K501-m1	63.88		SGLQAGLKQSHLSKA	0	7	321
RAVER1	RAVER1	Q8IY67	19p13.2	K587-m1	63.88		PRPSPAQKAAMWAST	0	7	322
RAVER1	RAVER1 iso2	Q8IY67-2	19p13.2	K562-m1	77.86		SSKAFQLKSRLLSPL	0	7	323
RB1	Rb	P06400	13q14.2	K810-m2	106.16	Rb_C	NIYISPLKSPYKISE	0	7	324
RBBP6	RBBP6	Q7Z6E9	16p12.1	K208-m1	201.56		EVKDPNMKGAMLTNT	0	7	325
RBBP6	RBBP6	Q7Z6E9	16p12.1	K1441-m1	201.56		LNEQGNFKSLSQSSK	0	7	326
RBBP6	RBBP6	Q7Z6E9	16p12.1	K1531-m1	201.56		KGTGDSKKSNSSPSR	0	7	327
RBBP7	RBBP7	Q16576	Xp22.2	K159-m1	47.82		DYTKHPAKPDPSGEC	0	7	328
RBM10	RBM10	P98175	Xp11.3	K881-m1	103.53	G-patch	GSGLGRKKQGIVTPI	0	7	329
RBM12	RBM12	Q9NTZ6	20q11.22	K485-m1	97.4	RRM_1	FRNEADYKAALCRHK	0	7	330
RBM15	RBM15	Q96T37	1p13.3	K420-m1	107.19	RRM_1	TSTYGFLKFENLDMS	0	7	332
RANBP2	RANBP2	P49792	2q13	K1842-m1	358.2		SQVGTGFKSNFSEKA	0	7	303
RANBP2	RANBP2	P49792	2q13	K1458-m1	358.2		FVHQASFKFGQGDLP	0	7	301
RACK1	RACK1	P63244	5q35.3	K271-m2	35.08		KIIVDELKQEVISTS	0	7	270
RALGAPA1	RALGAPA1	Q6GYQ0	14q13.2	K1133-m1	229.83		ILTPWLFKATMLTDK	0	7	285
RACK1	RACK1	P63244	5q35.3	K280-m1	35.08	WD40	EVISTSSKAEPPQCT	0	7	271
RAD50	RAD50	Q92878	5q31.1	K20-m1	153.89	AAA_23	RSFGIEDKDKQIITF	0	7	272
RAD9A	RAD9A	Q99638	11q13.2	K2-m1	42.55		AAAAAAMKCLVTGGN	0	7	274
RAE1	RAE1	P78406	20q13.31	K212-m1	40.97		RRIESPLKHQHRCVA	0	7	275
RAE1	RAE1	P78406	20q13.31	K258-m1	40.97		AKDNFTFKCHRSNGT	0	7	276
RAF1	RAF1	P04049	3p25.2	K18-m1	73.05		ISNGFGFKDAVFDGS	0	7	277
AGER	RAGE iso4	Q15109-4	6p21.32	K150-m3	39.02	C2-set_2	EESRRSRKRPCEQEV	0	7	278
RAI1	RAI1	Q7Z5J4	17p11.2	K13-m1	203.35		ERCGFHGKQQNYQQT	0	7	279
RAI1	RAI1	Q7Z5J4	17p11.2	K1188-m1	203.35		SHLPATFKVSSSPQK	0	7	280
RAI1	RAI1	Q7Z5J4	17p11.2	K1223-m1	203.35		DRPLHALKRKSAFMA	0	7	281
RAI1	RAI1	Q7Z5J4	17p11.2	K1303-m1	203.35		ETPDACLKLASRAAF	0	7	282
RAI1	RAI1	Q7Z5J4	17p11.2	K1347-m1	203.35		SLKKFACKAPGASPG	0	7	283
ZMIZ1	RAI17	Q9ULJ6	10q22.3	K404-m1	115.48		SLPIQNIKRPYPGEP	0	7	284
RALGAPA2	RALGAPA2	Q2PPJ7	20p11.23	K679-m1	210.77		KEKKQRGKGCVLDPQ	0	7	286
RANBP2	RANBP2	P49792	2q13	K1446-m1	358.2		QNTKSANKSGSSFVH	0	7	300
RALGAPB	RALGAPB	Q86X10	20q11.23	K393-m1	166.8		HRAVTVNKATMKTST	0	7	287
RALGAPB	RALGAPB	Q86X10	20q11.23	K397-m1	166.8		TVNKATMKTSTVSTA	0	7	288
RALGPS2	RALGPS2	Q86X27	1q25.2	K358-m1	65.17		KMNTAEFKSATFPNA	0	7	289
RALY	RALY	Q9UKM9	20q11.22	K4-m1	32.46		AAAAMSLKLQASNVT	0	7	290
RALY	RALY	Q9UKM9	20q11.22	K146-m1	32.46		VPRAVPVKRPRVTVP	0	7	291
RAN	RAN	P62826	12q24.33	K12-m1	24.42	Ras	GEPQVQFKLVLVGDG	0	7	292
RAN	RAN	P62826	12q24.33	K37-m1	24.42	Ras	HLTGEFEKKYVATLG	0	7	293
RAN	RAN	P62826	12q24.33	K60-m1	24.42	Ras	HTNRGPIKFNVWDTA	0	7	294
RAN	RAN	P62826	12q24.33	K134-m1	24.42	Ras	KDRKVKAKSIVFHRK	0	7	295
RAN	RAN	P62826	12q24.33	K159-m1	24.42	Ras	KSNYNFEKPFLWLAR	0	7	296
RANBP1	RANBP1	P43487	22q11.21	K68-m1	23.31	Ran_BP1	ENDLPEWKERGTGDV	0	7	297
RANBP2	RANBP2	P49792	2q13	K1032-m1	358.2		TTQPTPFKFNSNFKS	0	7	298
RANBP2	RANBP2	P49792	2q13	K1038-m1	358.2		FKFNSNFKSNDGDFT	0	7	299
PGM2L1	PGM2L1	Q6PCE3	11q13.4	K501-m1	70.44		CYEPPTIKSIFERLR	0	6	408
MTPAP	PAPD1	Q9NVV4	10p11.23	K562-m1	66.17		KNLLESLKGNRTENF	0	6	331
1	1	P00558	Xq21.1	K191-m1	44.61	PGK	KAGGFLMKKELNYFA	0	6	406
NASP	NASP	P49321	1p34.1	K721-m1	85.24		HLVRKKRKPEEESPR	0	6	46
MYO18A	MYO18A	Q92614	17q11.2	K463-m1	233.12	Myosin_head	EKVMHMFKGCRREDM	0	6	7
MYO1A	MYO1A	Q9UBC5	12q13.3	K659-m1	118.4	Myosin_head	GDREGVEKVLGELSM	0	6	8
MYO1B	MYO1B	O43795	2q32.3	K575-m1	131.99	Myosin_head	PTAGSQFKASVATLM	0	6	9
MYO1C	MYO1C	O00159	17p13.3	K868-m1	121.68		RSISPEWKQQLQQKA	0	6	10
MYO1D	MYO1D	O94832	17q11.2	K811-m1	116.2	Myosin_TH1	VAAVEMLKGQRADLG	0	6	11
MYO1G	MYO1G	B0I1T2	7p13	K518-m1	116.44	Myosin_head	FGRDFRIKHYAGDVT	0	6	13
MYO5A	MYO5A	Q9Y4I1	15q21.2	K1050-m1	215.4		HRIVQQAKEMTETME	0	6	14
MYO9A	MYO9A	B2RTY4	15q23	K1885-m3	292.71		LDNEDSKKDTLVDVV	0	6	15
MYOF	myoferlin	Q9NZM1	10q23.33	K1064-m1	234.71		IGWKFHWKQRSSDTF	0	6	16
MYOF	myoferlin	Q9NZM1	10q23.33	K1416-m1	234.71		EDIVPQLKASLLSAP	0	6	17
MYOF	myoferlin	Q9NZM1	10q23.33	K1934-m1	234.71		LKAMNPLKAKTASLF	0	6	18
PPP1R12A	MYPT1	O14974	12q21.2-q21.31	K539-m1	115.28		KWEDDLKKNSSVNEG	0	6	19
KAT7	MYST2	O95251	17q21.33	K376-m2	70.64		EFCLKYMKSQTILRR	0	6	24
KAT6A	MYST3	Q92794	8p11.21	K1174-m1	225.03		PGRKPGFKLSREIMP	0	6	27
KAT6A	MYST3	Q92794	8p11.21	K1330-m2	225.03		HLESTKKKELEEQPT	0	6	28
PKMYT1	Myt1	Q99640	16p13.3	K42-m1	54.52		AEPGFSLKRPRGLSR	0	6	29
PKMYT1	Myt1	Q99640	16p13.3	K126-m1	54.52	Pkinase	GSYGEVFKVRSKEDG	0	6	30
NCOR1	N-CoR1	O75376	17p12-p11.2	K1518-m1	270.21		KSTNHERKSTLTPTQ	0	6	31
GLYR1	N-PAC	Q49A26	16p13.3	K96-m1	60.55		FLRRAKGKDQTSSHN	0	6	32
GLYR1	N-PAC	Q49A26	16p13.3	K108-m1	60.55		SHNSSDDKNRRNSSE	0	6	33
N4BP2L2	N4BP2L2	Q92802	13q13.1	K509-m1	67.46	AAA_33	HEPETWWKFDPEELE	0	6	34
NAA15	NAA15	Q9BXJ9	4q31.1	K756-m1	101.27		NFNETFLKRNSDSLP	0	6	35
NAA25	NAA25	Q14CX7	12q24.13	K48-m1	112.29		HKDLHCAKVLKAIGL	0	6	38
NAA25	NAA25	Q14CX7	12q24.13	K219-m2	112.29		ALDVIRGKLGEKLTS	0	6	39
NAA30	NAA30	Q147X3	14q22.3	K102-m1	39.32		LRAAASLKSKVLSVA	0	6	40
NACA	NACA	E9PAV3	12q13.3	K1941-m1	205.42	NAC	RSEKKARKAMSKLGL	0	6	41
NACA	NACA	E9PAV3	12q13.3	K1971-m1	205.42	NAC	NILFVITKPDVYKSP	0	6	42
NACA	NACA	E9PAV3	12q13.3	K1976-m1	205.42	NAC	ITKPDVYKSPASDTY	0	6	43
NACA	NACA	E9PAV3	12q13.3	K2007-m1	205.42		LAAAEKFKVQGEAVS	0	6	44
MYO15A	MYO15A	Q9UKN7	17p11.2	K578-m3	395.29		SLARFLKKTLSEKKP	0	6	5
MYH9	MYH9	P35579	22q12.3	K1920-m1	226.53	Myosin_tail_1	EVSSLKNKLRRGDLP	0	6	3
MYH9	MYH9	P35579	22q12.3	K1918-m1	226.53	Myosin_tail_1	NREVSSLKNKLRRGD	0	6	2
MYCBP2	MYCBP2	O75592	13q22.3	K3214-m1	513.64		KEKKKKEKAEVRPRG	0	5	547
MTF2	MTF2	Q9Y483	1p22.1	K412-m1	67.11		PPGPYTRKMIQKTAE	0	5	526
MTF2	MTF2	Q9Y483	1p22.1	K416-m1	67.11		YTRKMIQKTAEPLLD	0	5	527
MTHFSD	MTHFSD iso3	Q2M296-3	16q24.1	K41-m1	42.1	5-FTHF_cyc-lig	HHRIPNFKGASHAAE	0	5	530
SBF2	MTMR13	Q86WG5	11p15.4	K1210-m1	208.46	Myotub-related	KGVVGLFKSQNSPQA	0	5	531
MTMR4	MTMR4	Q9NYA4	17q22	K95-m2	133.35		HISCKDSKVVRCHFS	0	5	533
SBF1	MTMR5	O95248	22q13.33	K1222-m1	208.32	Myotub-related	KGVVGLFKAQNAPSP	0	5	534
MTO1	MTO1	Q9Y2Z2	6q13	K245-m1	79.96	GIDA	GTPPRIAKESINFSI	0	5	535
MTO1	MTO1	Q9Y2Z2	6q13	K533-m1	79.96	GIDA_assoc	YERACWMKSSLEEGI	0	5	536
MTUS2	MTUS2	Q5JR59	13q12.3	K1075-m1	150.19		CEKLQKEKEELERRF	0	5	542
MTX3	MTX3	Q5HYI7	5q14.1	K38-m1	35.09	Tom37	KFSGAPLKVNVIDNT	0	5	543
MYB	Myb	P10242	6q23.3	K471-m1	72.34	Cmyb_C	PRTPTPFKHALAAQE	0	5	544
MYBBP1A	MYBBP1A	Q9BQG0	17p13.2	K30-m1	148.85		ADRYGLLKHSREFLD	0	5	545
MYBPC2	MYBPC2	Q14324	19q13.33	K1085-m2	128.07	I-set	KVVWMKNKMEIREDP	0	5	546
C12orf10	Myg1	Q9HB07	12q13.13	K218-m1	42.45	UPF0160	QDTEAGFKRAMDLVQ	0	5	548
MYH4	MYH4	Q9Y623	17p13.1	K1097-m1	223.07	Myosin_tail_1	EMSNLQGKIEDEQAL	0	5	563
MYH1	MYH1	P12882	17p13.1	K857-m2	223.15	Myosin_tail_1	EKEMANMKEEFEKTK	0	5	549
MYH1	MYH1	P12882	17p13.1	K862-m2	223.15	Myosin_tail_1	NMKEEFEKTKEELAK	0	5	550
MYH10	MYH10	P35580	17p13.1	K594-m1	229	Myosin_head	KADEWLMKNMDPLND	0	5	551
MYH10	MYH10	P35580	17p13.1	K658-m1	229	Myosin_head	RTVGQLYKESLTKLM	0	5	552
MYH10	MYH10	P35580	17p13.1	K1452-m1	229	Myosin_tail_1	NLEKKQKKFDQLLAE	0	5	553
MYH11	MYH11	P35749	16p13.11	K129-m1	227.34	Myosin_head	CVVVNPYKHLPIYSE	0	5	554
MYH11	MYH11	P35749	16p13.11	K658-m1	227.34	Myosin_head	RTVGQLYKEQLGKLM	0	5	555
MYH11	MYH11	P35749	16p13.11	K1452-m1	227.34	Myosin_tail_1	NLEKKQRKFDQLLAE	0	5	556
MYH14	MYH14	Q7Z406	19q13.33	K675-m1	227.87	Myosin_head	RTVGQLYKESLSRLM	0	5	558
MYH14	MYH14	Q7Z406	19q13.33	K1469-m1	227.87	Myosin_tail_1	TLEKKQRKFDQLLAE	0	5	559
MYH14	MYH14	Q7Z406	19q13.33	K1657-m1	227.87	Myosin_tail_1	MASAGQGKEEAVKQL	0	5	560
MYH4	MYH4	Q9Y623	17p13.1	K1030-m1	223.07	Myosin_tail_1	TLTKAKTKLEQQVDD	0	5	561
MYH4	MYH4	Q9Y623	17p13.1	K1087-m1	223.07	Myosin_tail_1	LNEKLKKKEFEMSNL	0	5	562
NAPEPLD	NAPEPLD	Q6IQ20	7q22.1	K59-m1	45.6		EDVTKSKKGKDGRFV	0	6	45
NAV1	NAV1	Q8NEY1	1q32.1	K706-m1	202.47		DPSLLSTKQGGLTPS	0	6	47
MTF2	MTF2	Q9Y483	1p22.1	K45-m1	67.11		KAKKPACKFEEGQDV	0	5	524
NAV1	NAV1	Q8NEY1	1q32.1	K1317-m1	202.47		LRSELWEKEMKLTDI	0	6	48
NDUFS1	NDUFS1	P28331	2q33.3	K298-m1	79.47		RFAYDGLKRQRLTEP	0	6	84
NDUFS2	NDUFS2	O75306	1q23.3	K122-m1	52.55		LLHRGTEKLIEYKTY	0	6	85
NDUFV3	NDUFV3 iso2	P56181-2	21q22.3	K260-m1	50.98		QVDEEFLKQSLKEKQ	0	6	86
NEB	NEB	P20929	2q23.3	K4541-m1	772.91		RKHYEDTKANVHIPN	0	6	90
NEBL	NEBL	O76041	10p12.31	K271-m1	116.45		ASNVKYKKDIQNMHD	0	6	91
NEBL	NEBL	O76041	10p12.31	K513-m2	116.45	Nebulin	LDVQRAKKASEMASQ	0	6	92
NEBL	NEBL	O76041	10p12.31	K524-m2	116.45	Nebulin	MASQKQYKKDLENEI	0	6	93
NEBL	NEBL	O76041	10p12.31	K525-m2	116.45	Nebulin	ASQKQYKKDLENEIK	0	6	94
NEBL	NEBL	O76041	10p12.31	K708-m3	116.45	Nebulin	PPELKRAKENQKNIS	0	6	95
NEBL	NEBL	O76041	10p12.31	K712-m3	116.45	Nebulin	KRAKENQKNISNVYY	0	6	96
NECAP1	NECAP1	Q8NC96	12p13.31	K154-m1	29.74	DUF1681	PKLDLGFKEGQTIKL	0	6	97
NECAP2	NECAP2	Q9NVZ3	1p36.13	K166-m1	28.34		KLNIANMKKKEGAAG	0	6	98
NEK1	NEK1	Q96PY6	4q33	K805-m1	142.83		SPRRAWGKSPTDSVL	0	6	99
NEK4	NEK4	P51957	3p21.1	K339-m1	94.6		PRASGLLKSPASLKA	0	6	100
NEK4	NEK4	P51957	3p21.1	K622-m1	94.6		ARERRRLKQSQEEMS	0	6	102
NEPRO	NEPRO	Q6NW34	3q13.2	K320-m1	64.55		RAFCNQLKHKATQET	0	6	103
NETO1	NETO1	Q8TDF5	18q22.3	K376-m1	60.19		RKKYVQRKSDFDQTV	0	6	105
NETO2	NETO2	Q8NC67	16q12.1	K336-m1	59.39		NHCKEKKKAGVFEQI	0	6	106
NEU3	NEU3	Q9UQ49	11q13.4	K426-m1	48.25		GRNPSQFKSNAAAAA	0	6	107
NFASC	neurofascin	O94856	1q32.1	K86-m1	150.03	Ig_3	SRFFNIAKDPRVSMR	0	6	108
NF1	NF1	P21359	17q11.2	K469-m1	319.37		MAPSLTFKEKVTSLK	0	6	109
NF1	NF1	P21359	17q11.2	K471-m1	319.37		PSLTFKEKVTSLKFK	0	6	110
NF1	NF1	P21359	17q11.2	K476-m1	319.37		KEKVTSLKFKEKPTD	0	6	111
NF1	NF1	P21359	17q11.2	K2489-m1	319.37		DPSYRTLKETQPWSS	0	6	112
NF1	NF1	P21359	17q11.2	K2520-m1	319.37		QTSPRARKSMSLDMG	0	6	113
ILF3	NFAT90	Q12906	19p13.2	K419-m1	95.34	dsrm	LKPGLQYKLVSQTGP	0	6	114
ILF3	NFAT90	Q12906	19p13.2	K613-m1	95.34		VPVRGGPKFAAKPHN	0	6	115
NFATC2IP	NFATC2IP	Q8NCF5	16p11.2	K218-m1	45.82		THTRALKKLSEVNKR	0	6	116
NFIB	NFI-B	O00712	9p23-p22.3	K400-m1	47.44	CTF_NFI	LNPQDTLKNYVPSYD	0	6	117
NDUFS1	NDUFS1	P28331	2q33.3	K157-m1	79.47		RSRFLEGKRAVEDKN	0	6	83
NDUFB3	NDUFB3	O43676	2q33.1	K59-m1	11.4	NDUF_B12	RYMGGFAKSVSFSDV	0	6	81
NDUFB3	NDUFB3	O43676	2q33.1	K39-m3	11.4		IQKKLAAKGLRDPWG	0	6	80
NCBP2	NCBP2	P52298	3q29	K151-m1	18		AGRGGYGKLAQNQAA	0	6	62
NAV1	NAV1	Q8NEY1	1q32.1	K1320-m1	202.47		ELWEKEMKLTDIRLE	0	6	49
NAV2	NAV2	Q8IVL1	11p15.1	K1146-m1	268.17		NANSFGFKKQSGSAA	0	6	50
NAV2	NAV2	Q8IVL1	11p15.1	K1147-m1	268.17		ANSFGFKKQSGSAAG	0	6	51
NAV3	NAV3	Q8IVL0	12q21.2	K2282-m2	255.65		EGLQMYGKRTPWEDP	0	6	52
NBEAL1	NBEAL1	Q6ZS30	2q33.2	K1999-m1	307.24		RSPQELFKASGLTQK	0	6	53
NBN	NBS1	O60934	8q21.3	K388-m1	84.96		PKEIKVSKMEQKFRM	0	6	54
NBN	NBS1	O60934	8q21.3	K715-m1	84.96	Nbs1_C	LIAHHARKNTELEEW	0	6	55
NBN	NBS1	O60934	8q21.3	K751-m1	84.96		FRYNPYLKRRRAAAA	0	6	56
NCALD	NCALD	P61601	8q22.3	K102-m2	22.25	EF-hand_7	GKLEQKLKWAFSMYD	0	6	57
NCAPG	NCAPG	Q9BPX3	4p15.31	K995-m1	114.33		MRLPRRAKTAALEKS	0	6	58
NCAPH	NCAPH	Q15003	2q11.2	K152-m1	82.56	Cnd2	DTEPTNFKVAAGTLD	0	6	59
NCBP1	NCBP1	Q09161	9q22.33	K204-m1	91.84	MIF4G	ANTESYLKRRQKTHV	0	6	60
NCBP2	NCBP2	P52298	3q29	K7-m1	18		AMSGGLLKALRSDSY	0	6	61
NCL	NCL	P19338	2q37.1	K3-m1	76.61		AAAAAMVKLAKAGKN	0	6	64
NDUFAB1	NDUFAB1	O14561	16p12.2	K106-m1	17.42	PP-binding	SVNSHFMKDLGLDSL	0	6	79
NCL	NCL	P19338	2q37.1	K71-m1	76.61		VVVSPTKKVAVATPA	0	6	65
NCL	NCL	P19338	2q37.1	K80-m1	76.61		AVATPAKKAAVTPGK	0	6	66
NCL	NCL	P19338	2q37.1	K116-m1	76.61		KKGATPGKALVATPG	0	6	68
NCL	NCL	P19338	2q37.1	K132-m1	76.61		KGAAIPAKGAKNGKN	0	6	69
NCL	NCL	P19338	2q37.1	K333-m1	76.61	RRM_1	GISDVFAKNDLAVVD	0	6	70
NCL	NCL	P19338	2q37.1	K646-m1	76.61		KVTLDWAKPKGEGGF	0	6	71
CWC22	NCM	Q9HCG8	2q31.3	K2-m1	105.47		AAAAAAMKSSVAQIK	0	6	72
CWC22	NCM	Q9HCG8	2q31.3	K841-m1	105.47		EKHTHRIKDSENFRR	0	6	73
NDST3	NDST3	O95803	4q26	K123-m1	100.9	HSNSD	DLPVLIDKMKGKYIL	0	6	74
NDST3	NDST3	O95803	4q26	K125-m1	100.9	HSNSD	PVLIDKMKGKYILII	0	6	75
NDUFA4	NDUFA4	O00483	7p21.3	K10-m2	9.37		RQIIGQAKKHPSLIP	0	6	76
NDUFA4	NDUFA4	O00483	7p21.3	K55-m1	9.37	B12D	NNPEPWNKLGPNDQY	0	6	77
NDUFA4	NDUFA4	O00483	7p21.3	K63-m1	9.37	B12D	LGPNDQYKFYSVNVD	0	6	78
MTF2	MTF2	Q9Y483	1p22.1	K378-m1	67.11		EFKIKGRKASKPISD	0	5	525
MTF2	MTF2	Q9Y483	1p22.1	K30-m1	67.11		KTPTSLTKLSLQDGH	0	5	523
1	1	P00558	Xq21.1	K30-m1	44.61	PGK	VDFNVPMKNNQITNN	0	6	405
MAP2K4	MKK4	P45985	17p12	K45-m1	44.29		QGKRKALKLNFANPP	0	5	448
MED1	MED1	Q15648	17q12	K1160-m1	168.48		PGSSPITKHGLSSGS	0	5	412
MED16	MED16	Q9Y2X0	19p13.3	K808-m1	96.79	Med16	CGCVTMLKSPNRTTA	0	5	413
MEF2D	MEF2D	Q14814	1q22	K267-m2	55.94		QLGAPSRKPDLRVIT	0	5	416
MAP3K2	MEKK2	Q9Y2U5	2q14.3	K260-m1	69.74		PIFEKFGKGGTYPRR	0	5	417
MELK	MELK	Q14680	9p13.2	K639-m3	74.64	KA1	KGDAWVYKRLVEDIL	0	5	418
MELK	MELK	Q14680	9p13.2	K650-m3	74.64	KA1	EDILSSCKVAAAAAA	0	5	419
MESD	MESDC2	Q14696	15q25.1	K95-m1	26.08	Mesd	SAPVDFSKIDPSKPE	0	5	421
METTL15	METT5D1	A6NJ78	11p14.1	K70-m1	46.12	Methyltransf_5	RDFETMAKLHIPVMV	0	5	422
METTL2A	METTL2A	Q96IZ6	17q23.2	K113-m1	43.54		SQNQNHLKDWFLENK	0	5	423
MFHAS1	MFHAS1	Q9Y4C4	8p23.1	K10-m1	116.95		GMDSGNLKTARLWRD	0	5	424
MFSD6L	MFSD6L	Q8IWD5	17p13.1	K217-m1	64	MFS_1_like	LPLLPGGKGPGNPAN	0	5	425
MGA	MGA	Q8IWI9	15q15.1	K928-m1	336.16		YPVSPKQKYSHVILG	0	5	426
MGAT4C	MGAT4C iso4	F8VTY5	12q21.31-q21.32	K98-m1	13.17		AATPLQRKPHGLLFI	0	5	428
NOA1	MGC3232	Q8NC60	4q12	K673-m3	78.46		IKGQRIKKSVAYKTK	0	5	429
RACGAP1	MgcRacGAP	Q9H0H5	12q13.12	K587-m1	71.03		TPEHQLLKTPSSSSL	0	5	430
RACGAP1	MgcRacGAP	Q9H0H5	12q13.12	K614-m1	71.03		PRFGSKSKSATNLGR	0	5	431
GRM1	mGluR1	Q13255	6q24.3	K740-m1	132.36	7tm_3	ILSYPSIKEVYLICN	0	5	432
MGME1	MGME1	Q9BQP7	20p11.23	K333-m2	39.42	PDDEXK_1	EEYTEKKKNQNIQKP	0	5	433
MIB2	MIB2	Q96AX9	1p36.33	K842-m1	109.94		AAEGRVLKALQGCAQ	0	5	434
MICAL2	MICAL2	O94851	11p15.3	K68-m1	126.69		KAKALWYKLDKRGSH	0	5	435
MICU1	MICU1 iso7	S4R3V1	10q22.1	K186-m1	24.47		KARFSKKKILHRVRK	0	5	436
MDN1	midasin	Q9NU22	6q15	K781-m2	632.82	AAA_5	SAVNKDGKDSETGLL	0	5	437
MDN1	midasin	Q9NU22	6q15	K3056-m1	632.82		SVLDSTLKGPGNLNR	0	5	438
MDN1	midasin	Q9NU22	6q15	K5546-m1	632.82		DIKVPIFKGPGEMPE	0	5	439
MINA	MINA	Q8IUF8	3q11.2	K82-m1	52.8	Cupin_4	TYYGSLFKLTDLKSL	0	5	440
MINA	MINA	Q8IUF8	3q11.2	K87-m1	52.8	Cupin_4	LFKLTDLKSLCSRGM	0	5	441
MINAR2	MINAR2	P59773	5q23.3	K107-m1	21.57	UPF0258	EEAMEERKKNPSWTI	0	5	442
MINK1	MINK	Q8N4C8	17p13.2	K590-m1	149.82		VAHRVPLKPYAAPVP	0	5	443
MIPOL1	MIPOL1	Q8TD10	14q13.3-q21.1	K147-m1	51.54		EQRKLKFKLELQEKE	0	5	444
MED1	MED1	Q15648	17q12	K1006-me	168.48		PSNDGKSKDKPPKRK	0	5	411
MED1	MED1	Q15648	17q12	K152-m1	168.48	Med1	KNFDEFSKHLKGLVN	0	5	410
MED1	MED1	Q15648	17q12	K2-m1	168.48		AAAAAAMKAQGETEE	0	5	409
SLC16A1	MCT1	P53985	1p13.2	K494-m1	53.94		KDTDGGPKEEESPVA	0	5	393
MATR3	matrin 3	P43243	5q31.2	K804-m1	94.62		PKTGFYCKLCSLFYT	0	5	377
MAX	MAX	P61244	14q23.3	K89-m1	18.27		QQDIDDLKRQNALLE	0	5	378
MBD1	MBD1	Q9UIS9	18q21.1	K595-m1	66.61		AVWLPRSKDLKKPGA	0	5	379
MBD1	MBD1 iso5	Q9UIS9-5	18q21.1	K172-m1	61.26	zf-CXXC	NREQRMFKSRGCGVC	0	5	380
MCC	MCC	P23508	5q22.2	K260-m1	93.03		EEELNRTKATMNAIR	0	5	381
MCF2L2	MCF2L2	Q86YR7	3q27.1	K435-m3	126.99		EFHRQLDKVSQWCEA	0	5	382
MCL1	MCL1	Q07820	1q21.2	K5-m1	37.34		AAAMFGLKRNAVIGL	0	5	384
MCM10	MCM10	Q7L590	10p13	K554-m1	98.18	Mcm10	GSPKPAIKSISASAL	0	5	385
MCM2	MCM2 iso4	B7Z8Z6	3q21.3	K457-m1	106.9		KDQQIGEKESSRNAS	0	5	386
MCM4	MCM4	P33991	8q11.21	K413-m1	96.56		SNVKSVYKTHIDVIH	0	5	388
MCM6	MCM6	Q14566	2q21.3	K205-m1	92.89	MCM_OB	SRFVDFQKVRIQETQ	0	5	390
MCM7	MCM7	P33993	7q22.1	K449-m2	81.31	MCM	CCIDEFDKMAEADRT	0	5	391
MCRS1	MCRS1	Q96EZ8	12q13.12	K74-m1	51.8		AKSSTRAKGASGVEP	0	5	392
MCTP2	MCTP2	Q6DN12	15q26.2	K13-m1	99.6		PSVWGSLKQRTRPLL	0	5	394
MECP2	MECP2	P51608	Xq28	K347-me	52.44		KSPGRKSKESSPKGR	0	5	408
1	1	Q14676	6p21.33	K45-m2	226.67		SGAHGPEKDFPLHLG	0	5	395
1	1	Q14676	6p21.33	K1075-m2	226.67		SPLLPSIKPTVRKTR	0	5	396
1	1	Q14676	6p21.33	K1104-m2	226.67		ELEPFHPKPKIRTRK	0	5	397
1	1	Q14676	6p21.33	K1140-m2	226.67		TAQPVTPKPTSQATR	0	5	398
1	1	Q14676	6p21.33	K1345-m2	226.67		TDQPVTPKPTSRTTR	0	5	399
1	1	Q14676	6p21.33	K1740-m2	226.67		LAAPIDHKPCSAPLE	0	5	400
MDH1	MDH1	P40925	2p15	K110-m1	36.43	Ldh_1_N	KANVKIFKSQGAALD	0	5	401
MDM1	MDM1	Q8TC05	12q15	K6-m1	80.74		AAMPVRFKGLSEYQR	0	5	402
MDM1	MDM1	Q8TC05	12q15	K573-m2	80.74		TSKNDFTKKESRAVS	0	5	403
MDM1	MDM1	Q8TC05	12q15	K574-m2	80.74		SKNDFTKKESRAVSL	0	5	404
MECP2	MECP2	P51608	Xq28	K119-m2	52.44	MBD	KSGRSAGKYDVYLIN	0	5	405
MECP2	MECP2	P51608	Xq28	K210-m2	52.44		TSEGVQVKRVLEKSP	0	5	406
MECP2	MECP2	P51608	Xq28	K267-m1	52.44		DPQAIPKKRGRKPGS	0	5	407
MIPOL1	MIPOL1	Q8TD10	14q13.3-q21.1	K153-m1	51.54		FKLELQEKETEAKIA	0	5	445
MAP2K6	MKK6	P52564	17q24.3	K141-m1	37.49	Pkinase	TSLDKFYKQVIDKGQ	0	5	450
MTF1	MTF1	Q14872	1p34.3	K307-m1	80.96	zf-C2H2	FSTQYSLKSHMKGHD	0	5	522
MKL1	MKL1	Q969V6	22q13.1-q13.2	K237-m1	98.92		KPKVKKLKYHQYIPP	0	5	451
MPRIP	MPRIP	Q6WCQ1	17p11.2	K990-m1	116.53		VSGYDIMKSKSNPDF	0	5	490
MPRIP	MPRIP	Q6WCQ1	17p11.2	K992-m1	116.53		GYDIMKSKSNPDFLK	0	5	491
CDC42BPB	MRCKB	Q9Y5S2	14q32.32	K1337-m1	194.32	CNH	LMATATLKRNSGTCL	0	5	492
CDC42BPB	MRCKB	Q9Y5S2	14q32.32	K1526-m1	194.32		PPRLIYFKSKFSGAV	0	5	493
CDC42BPB	MRCKB	Q9Y5S2	14q32.32	K1528-m1	194.32		RLIYFKSKFSGAVLN	0	5	494
ARID5B	Mrf-2	Q14865	10q21.2	K336-m2	132.37	ARID	YKYMKERKTPIERIP	0	5	495
MRNIP	MRNIP	Q6NTE8	5q35.3	K134-m1	37.74		FSKQPSSKMEEPGPR	0	5	496
MRPL30	MRPL30	Q8TCC3	2q11.2	K114-m1	18.55	Ribosomal_L30	NAKLKVVKHLIRIKP	0	5	497
MRPL35	MRPL35	Q9NZE8	2p11.2	K160-m1	21.51	Ribosomal_L35p	TQSKLLDKMTTSFWK	0	5	498
MRPL39	MRPL39	Q9NYK5	21q21.3	K253-m2	38.71		QNPERIVKLHRIGDF	0	5	499
MRPS30	MRPS30	Q9NP92	5p12	K275-m1	50.36	PDCD9	PDKLPLFKRQYENHI	0	5	500
MRS2	MRS2	Q9HD23	6p22.3	K425-m1	50.32		ADRSMELKNSLRLDG	0	5	502
MSANTD4	MSANTD4	Q8NCY6	11q22.3	K90-m1	41.15		KRMKANIKLVGSGFP	0	5	503
MSANTD4	MSANTD4	Q8NCY6	11q22.3	K114-m1	41.15		LTEEIDEKIGFRNDA	0	5	504
MSANTD4	MSANTD4	Q8NCY6	11q22.3	K297-m1	41.15		PQDIETEKLKLERER	0	5	505
MSH2	MSH2	P43246	2p21-p16.3	K104-m3	104.74	MutS_I	QYRVEVYKNRAGNKA	0	5	506
MSH3	MSH3	P20585	5q14.1	K316-m1	127.41	MutS_I	QTETAALKAIGDNRS	0	5	507
MSH6	MSH6	P52701	2p16.3	K1126-m1	152.79		EEEQENGKAYCVLVT	0	5	510
MSL1	MSL1	Q68DK7	17q21.1	K9-m1	67.13		TMRSAVFKAAAAPAG	0	5	511
MSL1	MSL1	Q68DK7	17q21.1	K273-m1	67.13		RRMQLVKKDNEKERH	0	5	512
MSR1	MSR1	P21757	8p22	K245-m1	49.76		QEIKGEVKVLNNITN	0	5	513
MSRA	MSRA	Q9UJ68	8p23.1	K41-m1	26.13		QEALPGRKEQTPVAA	0	5	514
MSRA	MSRA	Q9UJ68	8p23.1	K49-m1	26.13		EQTPVAAKHHVNGNR	0	5	515
STK4	MST1	Q13043	20q13.12	K59-m2	55.63	Pkinase	TGQIVAIKQVPVESD	0	5	516
MTA1	MTA1	Q13330	14q32.33	K532-m2	80.79	MTA_R1	VLKQAVRKPLEAVLR	0	5	517
MTA1	MTA1	Q13330	14q32.33	K582-m1	80.79		GSPTILGKRSYEQHN	0	5	518
MTA2	MTA2	O94776	11q12.3	K173-m1	75.02	ELM2	SDNRNQQKMEMKVWD	0	5	519
MTA2	MTA2	O94776	11q12.3	K559-m1	75.02		GLGGIMVKRAYETMA	0	5	520
MTBP	MTBP	Q96DY7	8q24.12	K739-m1	102.19	MTBP_C	SRLKRRSKDLNCLYP	0	5	521
MPP2	MPP2	Q14168	17q21.31	K255-m1	64.58	SH3_2	LPRQVFVKCHFDYDP	0	5	488
MPHOSPH9	MPHOSPH9	Q99550	12q24.31	K886-m1	133.02		STSLLIKKQRETSDT	0	5	487
MPHOSPH6	MPHOSPH6	Q99547	16q23.3	K153-m1	19.02		ITPIKAKKMFLKPQD	0	5	485
KMT2B	MLL2	Q9UMN6	19q13.12	K2203-m1	293.51		KLGQVFVKMAGEGEP	0	5	465
MKL1	MKL1	Q969V6	22q13.1-q13.2	K351-m2	98.92	SAP	PANLDDMKVAELKQE	0	5	452
MKL2	MKL2	Q9ULH7	16p13.12	K87-m1	118.13	RPEL	ARTENFLKHKIRSRP	0	5	453
MKL2	MKL2	Q9ULH7	16p13.12	K293-m1	118.13		KPRVKKLKYHQYIPP	0	5	454
MKL2	MKL2	Q9ULH7	16p13.12	K381-m1	118.13		NTSTPVRKPGPLPSS	0	5	455
KMT2A	MLL	Q03164	11q23.3	K623-m1	431.76		TFRWTSLKHSRSEPQ	0	5	456
KMT2A	MLL	Q03164	11q23.3	K636-m1	431.76		PQYFSSAKYAKEGLI	0	5	457
KMT2A	MLL	Q03164	11q23.3	K3804-m1	431.76		EEEEVQLKSARRATS	0	5	458
KMT2B	MLL2	Q9UMN6	19q13.12	K180-m1	293.51		PPKTPARKRGEEGTE	0	5	459
KMT2B	MLL2	Q9UMN6	19q13.12	K541-m1	293.51		ARSSRVIKTPRRFMD	0	5	460
KMT2B	MLL2	Q9UMN6	19q13.12	K797-m1	293.51		EKMFSLLKRAKVQLF	0	5	461
KMT2B	MLL2	Q9UMN6	19q13.12	K1161-m1	293.51		FPNGWTGKQKSPDGV	0	5	462
KMT2B	MLL2	Q9UMN6	19q13.12	K1866-m3	293.51		SFSGARIKVPNYSPS	0	5	463
KMT2B	MLL2	Q9UMN6	19q13.12	K1934-m1	293.51		RWASPPLKTSPQLRV	0	5	464
KMT2C	MLL3	Q8NEZ4	7q36.1	K843-m1	541.37		SPGRPRSKQGAWSTH	0	5	466
MPHOSPH10	MPHOSPH10	O00566	2p13.3	K641-m1	78.86	Mpp10	EGKDKALKSSQAFFS	0	5	484
KMT2D	MLL4	O14686	12q13.12	K2886-m1	593.39		ELRHNVQKGLGPGGT	0	5	467
KMT2D	MLL4	O14686	12q13.12	K4470-m1	593.39		LQKLLRAKNVQLSTG	0	5	468
KMT2D	MLL4	O14686	12q13.12	K5024-m2	593.39		GTALRPDKVPRDMRR	0	5	469
MLLT10	MLLT10	P55197	10p12.31	K280-m1	113.32		NSISGSLKRLEDTTA	0	5	470
MLLT3	MLLT3	P42568	9p21.3	K300-m1	63.35		LSAKKRKKSSSEALF	0	5	471
MLLT3	MLLT3	P42568	9p21.3	K308-m1	63.35		SSSEALFKSFSSAPP	0	5	472
MMP11	MMP11	P24347	22q11.23	K107-m1	54.59	Peptidase_M10	LSGGRWEKTDLTYRI	0	5	474
RC3H2	MNAB	Q9HBD1	9q33.2	K768-m1	131.67		REPCGHLKTSCEEQI	0	5	475
MON2	MON2	Q7Z3U7	12q14.1	K12-m1	190.36	DCB	SSPEAVKKLLENMQS	0	5	477
MORC2	MORC2	Q9Y6X9	22q12.2	K683-m1	117.82		KPANTLVKTASRPAP	0	5	480
MORC3	MORC3	Q14149	21q22.12	K261-m1	107.11		YCSILYLKPRMQIIL	0	5	481
MORF4L2	MORF4L2	Q15014	Xq22.2	K22-m1	32.31		SAEEENFKKPTRSNM	0	5	482
MOV10	MOV10	Q9HCE1	1p13.2	K94-m1	113.67		FPEKRRMKLGSDISK	0	5	483
RELA	NFkB-p65	Q04206	11q13.1	K37-m1	60.22	RHD_DNA_bind	RGMRFRYKCEGRSAG	0	6	118
RELA	NFkB-p65	Q04206	11q13.1	K218-me	60.22	RHD_dimer	EIFLLCDKVQKEDIE	0	6	119
RELA	NFkB-p65	Q04206	11q13.1	K221-me	60.22	RHD_dimer	LLCDKVQKEDIEVYF	0	6	120
PARD3	PAR3-alpha	Q8TEW0	10p11.22-p11.21	K181-m1	151.42		STTAGFLKQNTAGSP	0	6	335
OTUD4	OTUD4 iso5	Q01804-5	4q31.21	K167-m1	116.95		PLSGNELKNNGNSTS	0	6	302
OTUD7A	OTUD7A	Q8TE49	15q13.3	K586-m2	100.68		ASTSPSEKTTPSPTD	0	6	303
OVOL2	OVOL2	Q9BRP0	20p11.23	K3-m1	30.44		AAAAAMPKVFLVKRR	0	6	304
OVOL2	OVOL2	Q9BRP0	20p11.23	K8-m1	30.44		MPKVFLVKRRSLGVS	0	6	305
P2RX5	P2X5	Q93086	17p13.2	K218-m1	47.2	P2X_receptor	VKDRSFLKSCHFGPK	0	6	306
EP300	p300	Q09472	22q13.2	K243-m1	264.16		LRGPQPLKMGMMNNP	0	6	307
EP400	p400	Q96L91	12q24.33	K1459-m1	343.49		RPAAAKLKASRLFQP	0	6	308
TP53	p53	P04637	17p13.1	K370-me	43.65		RAHSSHLKSKKGQST	0	6	309
TP53	p53	P04637	17p13.1	K372-m1	43.65		HSSHLKSKKGQSTSR	0	6	310
TP53	p53	P04637	17p13.1	K373-m1	43.65		SSHLKSKKGQSTSRH	0	6	311
TP53	p53	P04637	17p13.1	K382-m2	43.65		QSTSRHKKLMFKTEG	0	6	312
TP53	p53	P04637	17p13.1	K386-m1	43.65		RHKKLMFKTEGPDSD	0	6	313
PAGR1	PA1	Q9BTK6	16p11.2	K209-m1	27.72	PAXIP1_C	DKVLSDMKRHKKLEE	0	6	315
PABPC1	PABP 1	P11940	8q22.3	K188-m1	70.67		AELGARAKEFTNVYI	0	6	316
PABPC1	PABP 1	P11940	8q22.3	K512-m1	70.67		VRTVPQYKYAAGVRN	0	6	317
PABPC3	PABP 3	Q9H361	13q12.13	K188-m1	70.03		AELGARAKEFPNVYI	0	6	318
PABPC4	PABP 4	Q13310	1p34.3	K188-m1	70.78		AELGAKAKEFTNVYI	0	6	319
PABPC4	PABP 4	Q13310	1p34.3	K375-m1	70.78		AQRKEERKAHLTNQY	0	6	320
PABPC4	PABP 4	Q13310	1p34.3	K524-m1	70.78		PRAVAPYKYASSVRS	0	6	321
PCLAF	PAF	Q15004	15q22.31	K15-m1	11.99	PAF	SVPGTYRKVVAARAP	0	6	324
PAF1	PAF1	Q8N7H5	19q13.2	K119-m1	59.98	Paf1	IQAPTSSKRSQQHAK	0	6	325
SERBP1	PAI-RBP1	Q8NC51	1p31.3	K327-m1	44.97		KKGFVLHKSKSEEAH	0	6	326
PAK4	PAK4	O96013	19q13.2	K78-m1	64.07		VRGSKGAKDGALTLL	0	6	327
PAN3	PAN3	Q58A45	13q12.2	K252-m1	95.61		PMGSKARKAKNPIGC	0	6	328
PAN3	PAN3	Q58A45	13q12.2	K496-m1	95.61		PPPNRIQKSSNFGYI	0	6	329
PAPOLG	PAP-gamma	Q9BWT3	2p16.1	K2-m1	82.8		AAAAAAMKEMSANTV	0	6	330
RPL14	RPL14	P50914	3p22.1	K199-m1	23.43		PKAQKGQKAPAQKAP	0	7	471
PAPD5	PAPD5	Q8NDF8	16q12.1	K210-m1	63.27	NTP_transf_2	VADEDSVKVLDKATV	0	6	332
PAWR	PAR-4	Q96IZ0	12q21.2	K146-m1	36.57		SSGPSARKGKGQIEK	0	6	333
OTUD4	OTUD4	Q01804	4q31.21	K1053-m1	124.04		TYGSRKYKSDWGYSG	0	6	301
OTUD4	OTUD4	Q01804	4q31.21	K1051-m1	124.04		NQTYGSRKYKSDWGY	0	6	300
OTUD4	OTUD4	Q01804	4q31.21	K1040-m1	124.04		ILRSGRSKQFYNQTY	0	6	299
OR1A1	OR1A1	Q9P1Q5	17p13.3	K231-m1	34.56	7tm_4	VFQVPSTKGVLKAFS	0	6	281
POU5F1	04-Oct	Q01860	6p21.33	K156-m1	38.57	Pou	FAKLLKQKRITLGYT	0	6	266
POU5F1	04-Oct	Q01860	6p21.33	K177-me	38.57	Pou	TLGVLFGKVFSQTTI	0	6	267
POU5F1	04-Oct	Q01860	6p21.33	K199-m1	38.57	Pou	LSFKNMCKLRPLLQK	0	6	269
POU5F1	04-Oct	Q01860	6p21.33	K206-m1	38.57	Pou	KLRPLLQKWVEEADN	0	6	270
ODF2	ODF2	Q5BJF6	9q34.11	K572-m2	95.4		ERCDKENKILKDEMN	0	6	271
ODF2	ODF2	Q5BJF6	9q34.11	K580-m2	95.4		ILKDEMNKEIEAARR	0	6	272
TENM2	ODZ2	Q9NT68	5q34	K321-m1	307.79	Ten_N	ETRHFLFKTSSGSTP	0	6	274
OFD1	OFD1	O75665	Xp22.2	K888-m2	116.67		KIREQQVKERRQREE	0	6	275
OIP5	OIP5	O43482	15q15.1	K215-m2	24.69		NRLKSLMKILSEVTP	0	6	276
OIP5	OIP5	O43482	15q15.1	K226-m2	24.69		EVTPDQSKPENAAAA	0	6	277
OLA1	OLA1	Q9NTK5	2q31.1	K323-m1	44.74	YchF-GTPase_C	VRAWTIRKGTKAPQA	0	6	278
OLA1	OLA1	Q9NTK5	2q31.1	K340-m1	44.74	YchF-GTPase_C	KIHTDFEKGFIMAEV	0	6	279
OR10S1	OR10S1	Q8NGN2	11q24.1	K9-m2	36.5		TSRSVCEKMTMTTEN	0	6	280
OR1I1	OR1I1	O60431	19p13.12	K298-m1	39.3	7tm_4	SIRNKDMKAALGKLI	0	6	282
OTUD3	OTUD3	Q5T2D3	1p36.13	K23-m3	45.12		RKAEAERKRDERAAR	0	6	297
OR1I1	OR1I1	O60431	19p13.12	K303-m1	39.3	7tm_4	DMKAALGKLIGKVAV	0	6	283
OR2L3	OR2L3	Q8NG85	1q44	K294-m2	35.28	7tm_4	IIYSLRNKEVMGALT	0	6	284
OR6C74	OR6C74	A6NCV1	12q13.2	K300-m3	35.25	7tm_4	KQVKDVFKHTVKKIE	0	6	285
OR6C75	OR6C75	A6NL08	12q13.2	K296-m2	35.37	7tm_4	TLRNKQVKQAFKSMV	0	6	286
OR6C75	OR6C75	A6NL08	12q13.2	K300-m2	35.37	7tm_4	KQVKQAFKSMVQKMI	0	6	287
ORC1	ORC1L	Q13415	1p32.3	K448-m1	97.35		RNLRSSLKSSLHTLT	0	6	288
ORC4	ORC4L	O43929	2q23.1	K7-m1	50.38		AMSSRKSKSNSLIHT	0	6	289
OSBPL10	OSBPL10	Q9BXB5	3p23	K231-m1	83.97		PAAARRAKSQYSGQL	0	6	290
OSBPL11	OSBPL11	Q9BXB4	3q21.2	K738-m1	83.64	Oxysterol_BP	VYHKPLWKIIPTTQP	0	6	291
OSER1	OSER1	Q9NX31	20q13.12	K19-m1	31.78	DUF776	SLQTAFKKLRVDASG	0	6	293
OXSR1	OSR1	O95747	3p22.2	K297-m1	58.02		FFQKAKNKEFLQEKT	0	6	294
OXSR1	OSR1	O95747	3p22.2	K444-m1	58.02	OSR1_C	VLRLRNSKKELNDIR	0	6	295
OSTM1	OSTM1	Q86WC4	6q21	K321-m1	37.26	OSTMP1	LILPKRLKSSTSFAN	0	6	296
PAWR	PAR-4	Q96IZ0	12q21.2	K227-m1	36.57		RTVSGRYKSTTSVSE	0	6	334
PARD3B	PAR3-beta	Q8TEW8	2q33.3	K514-m1	132.49	PDZ	AGLGVSLKGNKSRET	0	6	336
RELA	NFkB-p65	Q04206	11q13.1	K310-m1	60.22		KRTYETFKSIMKKSP	0	6	121
PARD3B	PAR3-beta	Q8TEW8	2q33.3	K517-m1	132.49	PDZ	GVSLKGNKSRETGTD	0	6	337
PDAP1	PDAP1	Q13442	7q22.1	K164-m1	20.63		KEEERKAKDDATLSG	0	6	370
PDCD11	PDCD11	Q14690	10q24.33	K219-m1	208.7		RAFLPLLKAQEYIRQ	0	6	371
PDCD11	PDCD11	Q14690	10q24.33	K378-m1	208.7		VPVQGFFKKAGATFR	0	6	372
PDCD11	PDCD11	Q14690	10q24.33	K379-m1	208.7		PVQGFFKKAGATFRL	0	6	373
PDE1C	PDE1C	Q14123	7p14.3	K695-m3	80.76		KMLDQRIKMKKIQNI	0	6	374
PDE4B	PDE4B	Q07343	1p31.3	K251-m1	83.34		EMASNKFKRMLNREL	0	6	375
PDE4C	PDE4C	Q08493	19p13.11	K238-m1	79.9		EMASNKFKRILNREL	0	6	376
PDE6A	PDE6A	P16499	5q32	K84-m2	99.55	GAF	CIFNVMKKLCFLLQA	0	6	377
PDGFRA	PDGFRA	P16234	4q12	K378-m1	122.67	I-set	QEIRYRSKLKLIRAK	0	6	378
PDHA1	PDHA1	P08559	Xp22.12	K385-m1	43.3		RGANQWIKFKSVSAA	0	6	379
PDHX	PDHX	O00330	11p13	K491-m1	54.12	2-oxoacid_dh	TRFLKSFKANLENPI	0	6	380
P4HB	PDIA1	P07237	17q25.3	K130-m1	57.12	Thioredoxin	DDIVNWLKKRTGPAA	0	6	381
PDLIM7	PDLIM7	Q9NR12	5q35.3	K145-m1	49.84		PLVPDASKQRLMENT	0	6	384
PDXDC1	PDXDC1	Q6P996	16p13.11	K680-m1	86.71		TEPIYVYKAQGAGVT	0	6	385
PEA15	PEA-15	Q15121	1q23.2	K109-m1	15.04		IPSAKKYKDIIRQPS	0	6	386
SERPINF1	PEDF	P36955	17p13.3	K316-m1	46.31	Serpin	QAVLTVPKLKLSYEG	0	6	387
BRPF1	peregrin	P55201	3p25.3	K547-m1	137.5		LHSYWTLKRQSRNGV	0	6	389
PLIN4	perilipin 4	Q96Q06	19p13.3	K89-m1	134.43		CSKMSRAKDAVSSGV	0	6	390
PRPH	peripherin	P41219	12q13.12	K98-m2	53.65	Filament	LATRSNEKQELQELN	0	6	391
GIGYF1	PERQ1	O75420	7q22.1	K35-m1	114.6		SPAMPKYKLADYRYG	0	6	392
GIGYF1	PERQ1	O75420	7q22.1	K858-m1	114.6		LVRGLGLKNSRSSPS	0	6	393
PEX16	PEX16	Q9Y5Y5	11p11.2	K169-m1	38.63	Pex16	HEQSYVGKRSNRVVR	0	6	394
PFDN1	PFDN1	O60925	5q31.3	K28-m1	14.21	Prefoldin_2	IDTQQKVKLADIQIE	0	6	395
PFKM	PFKM	P08237	12q13.11	K372-m1	85.18		KKFDEALKLRGRSFM	0	6	396
PFKP	PFKP	Q01813	10p15.2	K736-m1	85.6		FQPVAELKKQTDFEH	0	6	398
PFKP	PFKP	Q01813	10p15.2	K737-m1	85.6		QPVAELKKQTDFEHR	0	6	399
PGAM1	PGAM1	P18669	10q24.1	K241-m1	28.8		GDEETVRKAMEAVAA	0	6	402
PGAM1	PGAM1	P18669	10q24.1	K253-m1	28.8		VAAQGKAKKAAAAAA	0	6	403
PGBD4	PGBD4	Q96DM1	15q14	K257-m1	67	DDE_Tnp_1_7	DESLMLFKGPLAMKQ	0	6	404
PDAP1	PDAP1	Q13442	7q22.1	K126-m1	20.63	PP28	KAKERYMKMHLAGKT	0	6	369
PDAP1	PDAP1	Q13442	7q22.1	K7-m1	20.63		AMPKGGRKGGHKGRA	0	6	368
PCNP	PCNP	Q8WW12	3q12.3	K152-m1	18.92	PCNP	PNSFNKGKHGFSDNQ	0	6	367
PATZ1	PATZ1	Q9HBE1	22q12.2	K272-m1	74.06		RGRGRPRKANLLDSM	0	6	351
PARD3B	PAR3-beta	Q8TEW8	2q33.3	K869-m1	132.49		DPERKIKKKGFGAML	0	6	338
PARD3B	PAR3-beta	Q8TEW8	2q33.3	K870-m1	132.49		PERKIKKKGFGAMLR	0	6	339
PARG	PARG	Q86W56	10q11.23	K75-m1	111.11		SATSLVFKQKTITSW	0	6	340
PARG	PARG	Q86W56	10q11.23	K77-m1	111.11		TSLVFKQKTITSWMD	0	6	341
PARG	PARG	Q86W56	10q11.23	K616-m1	111.11	PARG_cat	TQPIPLLKQKMNHSI	0	6	342
PARP1	PARP1	P09874	1q42.12	K508-m1	113.08		AALSKKSKGQVKEEG	0	6	343
PARP1	PARP1	P09874	1q42.12	K654-m1	113.08		QDEEAVKKLTVNPGT	0	6	344
PARP1	PARP1	P09874	1q42.12	K674-m2	113.08	PARP_reg	KPVQDLIKMIFDVES	0	6	345
PARP1	PARP1	P09874	1q42.12	K1010-m1	113.08		LKLKFNFKTSLWAAA	0	6	346
PARP11	PARP11	Q9NR21	12p13.32	K268-m2	38.74	PARP	RHLFRTYKSMFLARV	0	6	347
PARP14	PARP14	Q460N5	3q21.1	K399-m1	202.8		SSIRSKYKVNPIKVD	0	6	348
PARPBP	PARPBP	Q9NWS1	12q23.2	K100-m1	65.05		KIYDDFLKNSNMLDL	0	6	349
PARVA	PARVA	Q9NVD7	11p15.3	K266-m1	42.24	CH	DKLNVVKKTLITFVN	0	6	350
PBXIP1	PBXIP1	Q96AQ6	1q21.3	K531-m1	80.64		VEESGSKKEGKRQGP	0	6	352
PCNP	PCNP	Q8WW12	3q12.3	K150-m1	18.92	PCNP	AGPNSFNKGKHGFSD	0	6	366
PBXIP1	PBXIP1	Q96AQ6	1q21.3	K539-m1	80.64		EGKRQGPKEPPRKSG	0	6	353
SUB1	PC4	P53999	5p13.3	K53-m1	14.4		SRALSSSKQSSSSRD	0	6	354
KAT2B	PCAF	Q92831	3p24.3	K78-m1	93.01	PCAF_N	GSARIAVKKAQLRSA	0	6	355
KAT2B	PCAF	Q92831	3p24.3	K89-m1	93.01	PCAF_N	LRSAPRAKKLEKLGV	0	6	356
KAT2B	PCAF	Q92831	3p24.3	K638-m1	93.01		TKYVGYIKDYEGATL	0	6	357
KAT2B	PCAF	Q92831	3p24.3	K671-me	93.01		KKQKEIIKKLIERKQ	0	6	358
KAT2B	PCAF	Q92831	3p24.3	K672-me	93.01		KQKEIIKKLIERKQA	0	6	359
KAT2B	PCAF	Q92831	3p24.3	K692-me	93.01		YPGLSCFKDGVRQIP	0	6	360
PCDHB5	PCDHB5	Q9Y5E4	5q31.3	K7-m1	86.42		AMETALAKTPQKRQV	0	6	361
PCDHGB4	PCDHGB4	Q9UN71	5q31.3	K190-m2	99.93	Cadherin	KEKSDGSKYPEMVLK	0	6	362
PCID2	PCID2	Q5JVF3	13q34	K219-m1	46.03		YKYYVGRKAMFDSDF	0	6	363
PCNP	PCNP	Q8WW12	3q12.3	K70-m1	18.92	PCNP	TKPTKISKFGFAIGS	0	6	364
PCNP	PCNP	Q8WW12	3q12.3	K133-m1	18.92	PCNP	PEAKMRMKNIGRDTP	0	6	365
POU5F1	04-Oct	Q01860	6p21.33	K154-m1	38.57	Pou	EQFAKLLKQKRITLG	0	6	265
POU5F1	04-Oct	Q01860	6p21.33	K151-m1	38.57	Pou	KELEQFAKLLKQKRI	0	6	264
POU5F1	04-Oct	Q01860	6p21.33	K144-m1	38.57	Pou	QDIKALQKELEQFAK	0	6	263
POU5F1	04-Oct	Q01860	6p21.33	K140-m1	38.57		PEESQDIKALQKELE	0	6	262
NME1	NME1	P15531	17q21.33	K100-m1	17.15	NDK	ETNPADSKPGTIRGD	0	6	160
NME3	NME3	Q13232	16p13.3	K29-m1	19.02	NDK	ERTFLAVKPDGVQRR	0	6	161
NNMT	NNMT	P40261	11q23.2	K8-m2	29.57	NNMT_PNMT_TEMT	MESGFTSKDTYLSHF	0	6	162
NNT	NNT	Q13423	5p12	K430-m1	113.9	AlaDh_PNT_C	IRGTVVMKDGKVIFP	0	6	163
RIOX1	NO66	Q9H6W3	14q24.3	K480-m1	71.09	Cupin_4	RRTAFMEKVRVLVAR	0	6	164
NOB1	NOB1P	Q9ULX3	16q22.1	K275-m1	46.67	NOB1_Zn_bind	LRCHGCFKTTSDMSR	0	6	165
NOL11	NOL11	Q9H8H0	17q24.2	K346-m1	81.12		AGALGKLKHSQDPGT	0	6	166
NOP56	NOL5A	O00567	20p13	K143-m1	66.05		LTDLSACKAQLGLGH	0	6	167
NOL6	NOL6	Q9H6R4	9p13.3	K1097-m1	127.59	Nrap_D6	SFQPQPFKASSTKGR	0	6	170
NOL7	NOL7	Q9UMY1	6p23	K178-m1	29.43	NUC129	SYLAVRLKDQDLRDS	0	6	171
NOL8	NOL8	Q76FK4	9q22.31	K574-m1	131.62		KPKFQAFKGVGCLYE	0	6	172
NOL9	NOL9	Q5SY16	1p36.31	K200-m1	79.32		REARNLLKSHLNLDD	0	6	174
NOLC1	NOLC1	Q14978	10q24.32	K663-m1	73.6	SRP40_C	ERANQVLKFTKGKSF	0	6	175
NONO	NONO	Q15233	Xq13.1	K5-m1	54.23		AAAMQSNKTFNLEKQ	0	6	176
NONO	NONO	Q15233	Xq13.1	K190-m1	54.23	RRM_1	DRGRPSGKGIVEFSG	0	6	177
NONO	NONO	Q15233	Xq13.1	K467-m1	54.23		GAEFAPNKRRRYAAA	0	6	178
NOP14	NOP14	P78316	4p16.3	K6-m1	97.67		AAMAKAKKVGARRKA	0	6	179
NOP14	NOP14	P78316	4p16.3	K12-m1	97.67		KKVGARRKASGAPAG	0	6	180
NOP2	NOP2	P46087	12p13.31	K22-m1	89.3		GRKARKQKGAETELV	0	6	181
NOSTRIN	NOSTRIN	Q8IVI9	2q24.3	K113-m2	57.66		NVQEKKRKSLDNEVE	0	6	182
DDIAS	NOXIN	Q8IXT1	11q14.1	K931-m3	111.62		MLAAVVTKKKTHKYN	0	6	183
NPM1	NPM1	P06748	5q35.1	K141-m1	32.58		KLLSISGKRSAPGGG	0	6	184
NPM1	NPM1	P06748	5q35.1	K223-m1	32.58		PSSTPRSKGQESFKK	0	6	185
NPM1	NPM1	P06748	5q35.1	K248-m1	32.58	NPM1-C	PSSVEDIKAKMQASI	0	6	186
NPM1	NPM1	P06748	5q35.1	K273-m1	32.58	NPM1-C	AKFINYVKNCFRMTD	0	6	187
NR2F1	NR2F1	P10589	5q15	K148-m1	46.16	zf-C4	CRLKKCLKVGMRREA	0	6	189
MAGED1	NRAGE	Q9Y5V3	Xp11.22	K147-m1	86.16		NKSEMAFKAQNATTK	0	6	191
NRAS	NRas	P01111	1p13.2	K88-m1	21.23	Ras	VFAINNSKSFADINL	0	6	192
NRCAM	NRCAM	Q92823	7q31.1	K783-m1	143.89	fn3	NGPGLQYKVSWRQKD	0	6	193
GRIN2A	NMDAR2A	Q12879	16p13.2	K880-m1	165.28	NMDAR2_C	GVHIEEKKKSPDFNL	0	6	159
NLRC4	NLRC4	Q9NPP4	2p22.3	K5-m1	116.16	CARD	AAAMNFIKDNSRALI	0	6	158
NKTR	NKTR	P30414	3p22.1	K862-m1	165.68		HSKKRTLKENLSDHL	0	6	157
UBAP2L	NICE-4	Q14157	1q21.3	K420-m1	114.53		AVHSPFTKRQAFTPS	0	6	138
RELA	NFkB-p65	Q04206	11q13.1	K314-m1	60.22		ETFKSIMKKSPFSGP	0	6	122
RELA	NFkB-p65	Q04206	11q13.1	K315-m1	60.22		TFKSIMKKSPFSGPT	0	6	123
NEFM	NFM	P07197	8p21.2	K102-m1	102.47	Filament	KLSRSNEKEQLQGLN	0	6	124
NFRKB	NFRKB	Q6P4R8	11q24.3	K1196-m1	139		SVISQPMKGKSVVTA	0	6	125
NFRKB	NFRKB	Q6P4R8	11q24.3	K1198-m1	139		ISQPMKGKSVVTAPI	0	6	126
NGLY1	NGLY1	Q96IV0	3p24.2	K210-m3	74.39		LKRKSQEKLSRARKL	0	6	129
SNU13	NHP2L1	P55769	22q13.2	K33-m1	14.17	Ribosomal_L7Ae	VQQSCNYKQLRKGAN	0	6	131
NHS	NHS	Q6T4R5	Xp22.2-p22.13	K1523-m1	179.14		EFKLLLLKKGSRSDS	0	6	132
NHS	NHS	Q6T4R5	Xp22.2-p22.13	K1524-m1	179.14		FKLLLLKKGSRSDSS	0	6	133
NHS	NHS	Q6T4R5	Xp22.2-p22.13	K1591-m1	179.14		NAEGFSSKSFATSAS	0	6	134
NHSL1	NHSL1	Q5SYE7	6q24.1	K1415-m1	170.67		SIQRSIRKSSTSSDN	0	6	135
NHSL1	NHSL1	Q5SYE7	6q24.1	K1424-m1	170.67		STSSDNFKALLLKKG	0	6	136
NHSL2	NHSL2	Q5HYW2	Xq13.1	K977-m1	133.29		SVEDEGPKVRVLPER	0	6	137
NIFK	NIFK	Q9BYG3	2q14.3	K139-m1	34.22		KDWNIPFKQPSYPSV	0	6	139
NKTR	NKTR	P30414	3p22.1	K639-m1	165.68		RIQEMKAKTTHLLPI	0	6	156
NIPBL	NIPBL	Q6KC79	5p13.2	K954-m1	316.05		GGRSGALKNFVIPKI	0	6	140
NIPBL	NIPBL	Q6KC79	5p13.2	K2121-m1	316.05		YGAISKLKSQHQEDP	0	6	141
PPP1R8	NIPP-1	Q12972	1p35.3	K236-m1	38.48		AVVPVKKKRVEGPGS	0	6	142
NIPSNAP3A	NIPSNAP3A	Q9UFN0	9q31.1	K166-m1	28.47	NIPSNAP	ALWGDAFKRAVHAHV	0	6	143
NKAPD1	NKAPD1	Q6ZUT1	11q23.1	K89-m1	34.11	NKAP	TLEDDFLKAKSWNKK	0	6	144
NKAPD1	NKAPD1	Q6ZUT1	11q23.1	K91-m1	34.11	NKAP	EDDFLKAKSWNKKFY	0	6	145
NKAPD1	NKAPD1	Q6ZUT1	11q23.1	K198-m2	34.11	NKAP	TGASGTRKGKQPHKR	0	6	146
NKAPD1	NKAPD1	Q6ZUT1	11q23.1	K200-m2	34.11	NKAP	ASGTRKGKQPHKRKK	0	6	147
SLC12A2	NKCC1	P55011	5q23.3	K833-m1	131.45	SLC12	GPRRQAMKEMSIDQA	0	6	149
NKRF	NKRF	O15226	Xq24	K288-m1	77.67		RVVRRKFKHTFGEDL	0	6	152
NKRF	NKRF	O15226	Xq24	K546-m1	77.67		RSAEEAYKQQIKEDN	0	6	153
NKRF	NKRF	O15226	Xq24	K666-m3	77.67		VVGRKRRKEDLLDQL	0	6	154
NKTR	NKTR	P30414	3p22.1	K637-m1	165.68		YERIQEMKAKTTHLL	0	6	155
NRDE2	NRDE2	Q9H7Z3	14q32.11	K97-m1	132.67		RKHQHHKKTKRKHGP	0	6	194
NRDE2	NRDE2	Q9H7Z3	14q32.11	K99-m1	132.67		HQHHKKTKRKHGPSS	0	6	195
NRDE2	NRDE2	Q9H7Z3	14q32.11	K101-m1	132.67		HHKKTKRKHGPSSSS	0	6	196
NUP50	NUP50	Q9UKX7	22q13.31	K59-m1	50.14	NUP50	SDTGGAFKGFKGLVV	0	6	246
NUMB	NUMB iso3	P49757-3	14q24.2-q24.3	K63-m1	69.43	PID	HICEDAVKRLKATGK	0	6	233
NUP107	NUP107	P57740	12q15	K25-m1	106.37		EVTRTARKQSAQKRV	0	6	234
NUP107	NUP107	P57740	12q15	K305-m1	106.37	Nup84_Nup100	ENTLHTLKQRQLTSY	0	6	235
NUP153	NUP153	P49790	6p22.3	K250-m1	153.94	Nup153	LGNSSILKTSQLGDS	0	6	236
NUP153	NUP153	P49790	6p22.3	K292-m1	153.94	Nup153	APVRRQMKAKQLSAQ	0	6	237
NUP153	NUP153	P49790	6p22.3	K294-m1	153.94	Nup153	VRRQMKAKQLSAQSY	0	6	238
NUP153	NUP153	P49790	6p22.3	K1468-m1	153.94	Nup_retrotrp_bd	SFSGRKIKTAVRRRK	0	6	239
NUP160	NUP160	Q12769	11p11.2	K1006-m1	162.12		TLRTCIFKHHLDLGH	0	6	240
NUP205	NUP205	Q92621	7q33	K1932-m1	227.92		FASRTLFKSRRLQDS	0	6	241
NUP214	NUP214	P35658	9q34.13	K640-m1	213.62		PPSSVPLKSSVLPSP	0	6	242
NUP214	NUP214	P35658	9q34.13	K665-m1	213.62		PVPSMVQKSPRITPP	0	6	243
NUP214	NUP214	P35658	9q34.13	K943-m1	213.62		PAKLSPMKQAQLRNF	0	6	244
NUP214	NUP214	P35658	9q34.13	K1037-m1	213.62		PHAAPFAKSHLVHGS	0	6	245
NUP50	NUP50	Q9UKX7	22q13.31	K62-m1	50.14	NUP50	GGAFKGFKGLVVPSG	0	6	247
NUGGC	NUGGC	Q68CJ6	8p21.1	K29-m2	91.13		ERTRKRRKSDRDQRF	0	6	231
NUP50	NUP50	Q9UKX7	22q13.31	K275-m1	50.14		SASFNFGKKVDSSVL	0	6	248
NUP98	NUP98	P52948	11p15.4	K572-m1	197.58		LQTTGTAKSHLFDGL	0	6	249
NUP98	NUP98	P52948	11p15.4	K1128-m1	197.58		EKSVTYGKGKLLMDM	0	6	250
NUSAP1	NUSAP1	Q9BXS6	15q15.1	K186-m1	49.45	NUSAP	AITTPNFKKLHEAHF	0	6	251
NUSAP1	NUSAP1	Q9BXS6	15q15.1	K267-m1	49.45	NUSAP	SQSTLGLKGSLKRSA	0	6	252
NUSAP1	NUSAP1	Q9BXS6	15q15.1	K271-m1	49.45	NUSAP	LGLKGSLKRSAISAA	0	6	253
NUSAP1	NUSAP1	Q9BXS6	15q15.1	K384-m1	49.45	NUSAP	LKPWGQSKENNYLNQ	0	6	254
NXF1	NXF1	Q9UBU9	11q12.3	K230-m1	70.18		SQQALDLKGLRSDPD	0	6	256
NXF2	NXF2	Q9GZY0	Xq22.1	K90-m1	71.63		IRCERRMKWHSEDEI	0	6	257
NYNRIN	NYNRIN	Q9P2P1	14q12	K21-m1	208.37		FMVQTKSKPRVQRQR	0	6	258
OAS3	OAS3	Q9Y6K5	12q24.13	K958-m1	121.17	OAS1_C	HWYQQCTKISKGRGS	0	6	259
OBSL1	OBSL1	O75147	2q35	K2-m1	206.95		AAAAAAMKASSGDQG	0	6	260
OBSL1	OBSL1	O75147	2q35	K528-m1	206.95		PILAEMFKGHKNTVL	0	6	261
NUMA1	NuMA-1	Q14980	11q13.4	K2114-m1	238.26		PRAKGKAKHAAAAAA	0	6	232
NUDT5	NUDT5	Q9UKK9	10p14	K218-m1	24.33		PFEVPFLKFAAAAAA	0	6	230
NRK	NRK	Q7Z2Y5	Xq22.3	K818-m2	178.48		SLLEQAQKPIDIRQR	0	6	198
NT5C3B	NT5C3B	Q969T7	17q21.2	K10-m1	34.39		EEVSTLMKATVLMRQ	0	6	214
NRXN3	NRXN3	Q9Y4C0	14q24.3-q31.1	K636-m2	180.6		MQNAAGVKSSCSRMS	0	6	199
SYNCRIP	NSAP1	O60506	6q14.3	K123-m3	69.6		SKGPDEAKIKALLER	0	6	200
SYNCRIP	NSAP1	O60506	6q14.3	K213-m1	69.6	RRM_1	AFVTFCTKEAAQEAV	0	6	201
SYNCRIP	NSAP1	O60506	6q14.3	K363-m1	69.6	RRM_1	KAFSQFGKLERVKKL	0	6	202
HMGN5	NSBP1	P82970	Xq21.1	K5-m1	31.52	HMG14_17	AAAMPKRKAAGQGDM	0	6	203
NSD1	NSD1	Q96L73	5q35.3	K501-m1	296.65		CAKSRARKSSDNPKR	0	6	204
NSD1	NSD1	Q96L73	5q35.3	K2518-m1	296.65		DPLQTSGKAAAPSED	0	6	206
NSD1	NSD1	Q96L73	5q35.3	K2581-m1	296.65		PGLVKQAKQMVGGQQ	0	6	207
NSFL1C	NSFL1C	Q9UNZ2	20p13	K124-m1	40.57		ELVDDLFKGAKEHGA	0	6	208
NSFL1C	NSFL1C	Q9UNZ2	20p13	K247-m3	40.57	SEP	DEDFVKPKGAFKAFT	0	6	209
NSFL1C	NSFL1C	Q9UNZ2	20p13	K251-m3	40.57	SEP	VKPKGAFKAFTGEGQ	0	6	210
NSUN5	NSUN5	Q96P11	7q11.23	K155-m1	46.69		DDVVDYFKRQGFSYQ	0	6	212
NT5C1B	NT5C1B iso5	NP-001186017	2p24.2	K146-m1	69.03		RSRNTSAKVELPSSS	0	6	213
NUBPL	NUBPL	Q8TB37	14q12	K61-m1	34.08		SRGLPKQKPIEGVKQ	0	6	215
NUDT5	NUDT5	Q9UKK9	10p14	K205-m1	24.33		YSYALALKHANAKPF	0	6	229
NUCKS1	NUCKS	Q9H1E3	1q32.1	K9-me	27.3		SRPVRNRKVVDYSQF	0	6	216
NUCKS1	NUCKS	Q9H1E3	1q32.1	K35-m1	27.3		RDSGPPTKKIRSSPR	0	6	217
NUCKS1	NUCKS	Q9H1E3	1q32.1	K64-me	27.3		DSEDSEDKDVKTKKD	0	6	218
NUCKS1	NUCKS	Q9H1E3	1q32.1	K98-m1	27.3		QQRQAASKAASKQRE	0	6	219
NUCKS1	NUCKS	Q9H1E3	1q32.1	K175-m1	27.3		KMPKPRLKATVTPSP	0	6	220
NUCKS1	NUCKS	Q9H1E3	1q32.1	K184-m1	27.3		TVTPSPVKGKGKVGR	0	6	221
NUCKS1	NUCKS	Q9H1E3	1q32.1	K186-m1	27.3		TPSPVKGKGKVGRPT	0	6	222
NUCKS1	NUCKS	Q9H1E3	1q32.1	K218-me	27.3		EPESPPEKKTSTSPP	0	6	223
NUDC	NUDC	Q9Y266	1p36.11	K327-m1	38.24		HPEMDFSKAKFNAAA	0	6	224
NUDC	NUDC	Q9Y266	1p36.11	K329-m1	38.24		EMDFSKAKFNAAAAA	0	6	225
NUDT10	NUDT10	Q8NFP7	Xp11.22	K73-m1	18.5	NUDIX	VYEEAGVKGKLGRLL	0	6	226
NUDT10	NUDT10	Q8NFP7	Xp11.22	K75-m1	18.5	NUDIX	EEAGVKGKLGRLLGV	0	6	227
NUDT4	NUDT4	Q9NZJ9	12q22	K76-m1	20.31	NUDIX	EEAGVKGKLGRLLGI	0	6	228
RPL14	RPL14	P50914	3p22.1	K53-m1	23.43	Ribosomal_L14e	RRQAMPFKCMQLTDF	0	7	470
RPL30	RPL30	P62888	8q22.2	K32-m1	12.78	Ribosomal_L7Ae	GKYVLGYKQTLKMIR	0	7	493
RPL14	RPL14	P50914	3p22.1	K204-m1	23.43		GQKAPAQKAPAPKAS	0	7	472
TRIR	TRIR	Q9BQ61	19p13.13	K128-m1	18.42		GGNKLALKTGIVAKK	0	9	99
TRPM1	TRPM1	Q7Z4N2	15q13.3	K1590-m2	182.18		SGMTAEEKKVKKEKA	0	9	105
TRPA1	TRPA1	O75762	8q21.11	K504-m1	127.5	Ank_2	VVQLLLKKGALFLSD	0	9	104
TRPA1	TRPA1	O75762	8q21.11	K503-m1	127.5	Ank_2	KVVQLLLKKGALFLS	0	9	103
TRPA1	TRPA1	O75762	8q21.11	K337-m1	127.5	Ank_2	SVGADINKIDSEGRS	0	9	102
TRMT1L	TRM1L	Q7Z2T5	1q25.3	K611-m1	81.75	TRM	YIAQGKRKSNEMITN	0	9	101
TRMT1L	TRM1L	Q7Z2T5	1q25.3	K609-m1	81.75	TRM	DNYIAQGKRKSNEMI	0	9	100
TRIR	TRIR	Q9BQ61	19p13.13	K118-m1	18.42		STLSFVGKRRGGNKL	0	9	98
TRRAP	TRRAP	Q9Y4A5	7q22.1	K1691-m1	437.6		NMAATNWKEPKLLAY	0	9	107
JMJD1C	TRIP8	Q15652	10q21.3	K1265-m1	284.52		KDSQANFKSSSEQSL	0	9	97
TRIP6	TRIP6	Q15654	7q22.1	K261-m1	50.29		DELDRLTKKLVHDMN	0	9	96
TRIP6	TRIP6	Q15654	7q22.1	K224-m1	50.29		REPGPGAKEEAAGVS	0	9	95
TRIP12	TRIP12	Q14669	2q36.3	K308-m1	220.43		SLRKSTKKRSESPPA	0	9	94
TRIP12	TRIP12	Q14669	2q36.3	K223-m1	220.43		VPPGARVKQGKDQNK	0	9	93
TRIP12	TRIP12	Q14669	2q36.3	K123-m1	220.43		LDQEQQLKSAQSPST	0	9	92
TRPS1	TRPS1	Q9UHF7	8q23.3	K159-m2	141.52		EDQKMSPKATEETGQ	0	9	106
TRRAP	TRRAP	Q9Y4A5	7q22.1	K2405-m1	437.6		KMMTYIEKRFPEDLE	0	9	108
TRIM71	TRIM71	Q2Q1W2	3p22.3	K495-m1	93.38	Filamin	KATGDGLKRALQGKV	0	9	90
TSR1	TSR1	Q2NL82	17p13.3	K42-m1	91.81		LALKTLSKKVRKELS	0	9	117
TUBA1A	TUBA1A	Q71U36	12q13.12	K40-m3	50.14	Tubulin	DGQMPSDKTIGGGDD	0	9	125
TTK	TTK	P33981	6q14.1	K708-me	97.07	Pkinase	SRENGKSKSKISPKS	0	9	124
TTF1	TTF1	Q15361	9q34.13	K528-m1	103.05		LERFKEFKAQGVAIK	0	9	121
TTC9	TTC9	Q92623	14q24.2	K165-m3	24.38	TPR_2	KKEGENFKALYRSGV	0	9	120
TTC7B	TTC7B	Q86TV6	14q32.11	K302-m1	94.18		LRKGANTKTYTLTRR	0	9	119
TTC37	TTC37	Q6PGP7	5q15	K484-m1	175.49		KALTHFLKAARLDTY	0	9	118
TSPYL5	TSPYL5	Q86VY4	8q22.1	K185-m1	45.14		SVSAGEEKKEERDAG	0	9	116
TXNRD1	TRXR1	Q16881	12q23.3	K138-m1	70.91		GGHGPTLKAYQEGRL	0	9	109
TSPYL2	TSPYL2	Q9H2G4	Xp11.22	K407-m3	79.44	NAP	GSRIKRKKQEMKKRK	0	9	115
TSPAN6	TSPAN6	O43657	Xq22.1	K123-m2	27.56	Tetraspannin	HEIKNSFKNNYEKAL	0	9	114
TSEN34	TSEN34	Q9BSV6	19q13.42	K87-m1	33.65		SLALTSFKRQQEESF	0	9	113
TSC2	TSC2	P49815	16p13.3	K967-m1	200.61		SPPVKEFKESSAAEA	0	9	112
C6orf10	TSBP	Q5SRN2	6p21.32	K503-m2	61.63		KGNNDKEKERDAEKD	0	9	111
TXNRD1	TRXR1	Q16881	12q23.3	K150-m1	70.91		GRLQKLLKMNGPEDL	0	9	110
TRIP11	TRIP11	Q15643	14q32.12	K1399-m1	227.59		DSEIKQLKEKQDVLQ	0	9	91
TRIM7	TRIM7	Q9C029	5q35.3	K138-m1	56.63	zf-B_box	GQHGEPFKLYCQDDG	0	9	89
TUBA1A	TUBA1A	Q71U36	12q13.12	K338-m1	50.14	Tubulin_C	AIATIKTKRTIQFVD	0	9	127
THRAP3	Trap150	Q9Y2W1	1p34.3	K500-m1	108.67	THRAP3_BCLAF1	ESFPERSKKEDRGKR	0	9	63
TCOF1	treacle	Q13428	5q32-q33.1	K449-m1	152.11	Treacle	PAKESPRKGAAPAPP	0	9	69
TCOF1	treacle	Q13428	5q32-q33.1	K124-m1	152.11		LPSSMKEKAKAETEK	0	9	68
TRDN	TRDN	Q13061	6q22.31	K625-m3	81.6		SEKESKEKADMKHLR	0	9	67
TRAPPC5	TRAPPC5	Q8IUR0	19p13.2	K9-m1	20.78		EARFTRGKSALLERA	0	9	66
MED14	Trap170	O60244	Xp11.4	K399-m2	160.61		IDHLSIEKLLIDSVH	0	9	65
THRAP3	Trap150	Q9Y2W1	1p34.3	K711-m1	108.67	THRAP3_BCLAF1	YKAEGKYKDDPVDLR	0	9	64
THRAP3	Trap150	Q9Y2W1	1p34.3	K442-m3	108.67	THRAP3_BCLAF1	KDKAKGRKESEFDDE	0	9	62
TREX1	TREX1	Q9NSU2	3p21.31	K277-m2	33.21		TKDLPPVKDPGALSR	0	9	71
THRAP3	Trap150	Q9Y2W1	1p34.3	K252-m1	108.67	THRAP3_BCLAF1	RERSPALKSPLQSVV	0	9	61
THRAP3	Trap150	Q9Y2W1	1p34.3	K202-m2	108.67	THRAP3_BCLAF1	DNQGDEAKEQTFSGG	0	9	60
TRAK2	TRAK2	O60296	2q33.1	K831-m1	101.42		PPDVGQLKMNLVDRL	0	9	59
TRAF7	TRAF7	Q6Q0C0	16p13.3	K387-m1	74.61	WD40	YDPQQIFKCKGTFVG	0	9	58
KNSTRN	TRAF4AF1	Q9Y448	15q15.1	K268-m3	35.44		LFNETAKKQMEELQA	0	9	57
TRAF3	TRAF3	Q13114	14q32.32	K138-m1	64.49	zf-TRAF	GHLLVHLKNDCHFEE	0	9	56
TCOF1	treacle	Q13428	5q32-q33.1	K732-m1	152.11	Treacle	KAASVPVKGSLGQGT	0	9	70
RNF216	TRIAD3 iso1	Q9NWF9-1	7p22.1	K89-m1	105.88		AAQWQDLKRLGEERP	0	9	72
TRIM55	TRIM55	Q9BYV6	8q13.1	K226-m2	60.47		YGILEERKNEMTQVI	0	9	88
TRIM29	TRIM29	Q14134	11q23.3	K509-m1	65.83		FNNLYGTKGNYTSRV	0	9	81
TRIM49B	TRIM49B	A6NDI0	11p11.12	K202-m2	52.75		KHNLEMLKKKGKDIF	0	9	87
TRIM49	TRIM49	P0CI25	11q14.3	K202-m2	52.89		KHNLEMLKKKGKEIF	0	9	86
TRIM48	TRIM48	Q8IWZ4	11q11	K100-m1	24.5	zf-B_box	CGIHRETKKMFCEVD	0	9	85
TRIM35	TRIM35	Q9UPQ4	8p21.2	K138-m3	56.54		GHRVQPVKDTAHDFR	0	9	84
TRIM34	TRIM34	Q9BYJ4	11p15.4	K93-m1	56.86	zf-B_box	LSPDNGKKRDLCDHH	0	9	83
TRIM29	TRIM29	Q14134	11q23.3	K561-m1	65.83		KAQPQTWKSGKQTML	0	9	82
TRIM29	TRIM29	Q14134	11q23.3	K469-m1	65.83		WSAPDTMKRYSMYLT	0	9	80
TRIM16	TRIM16	O95361	17p12	K188-m1	63.96		LDLERKLKLNENAIS	0	9	73
TRIM25	TRIM25	Q14258	17q22	K437-m1	70.97		HPNSTSLKAKVLETF	0	9	79
TRIM25	TRIM25	Q14258	17q22	K425-m1	70.97		AGLEAAAKATSSHPN	0	9	78
TRIM25	TRIM25	Q14258	17q22	K416-m1	70.97		PEQLVDLKQAGLEAA	0	9	77
TRIM25	TRIM25	Q14258	17q22	K284-m1	70.97		IYQILLKKKSEIQTL	0	9	76
TRIM25	TRIM25	Q14258	17q22	K283-m1	70.97		TIYQILLKKKSEIQT	0	9	75
TRIM21	TRIM21	P19474	11p15.4	K138-m1	54.17		AAQEYQEKLQVALGE	0	9	74
TUBA1A	TUBA1A	Q71U36	12q13.12	K163-m1	50.14	Tubulin	RLSVDYGKKSKLEFS	0	9	126
TUBA1B	TUBA1B	P68363	12q13.12	K338-m1	50.15	Tubulin_C	AIATIKTKRSIQFVD	0	9	128
TBL1X	TBL1X	O60907	Xp22.31-p22.2	K527-m1	62.5	WD40	LASGSFDKCVHIWNT	0	8	507
UBXN4	UBXN4	Q92575	2q21.3	K301-m3	56.78		KAAALLAKQAEMEVK	0	9	173
UHRF1BP1L	UHRF1BP1L	A0JNW5	12q23.1	K1077-m1	164.2		TPPVRTLKSQSSLSG	0	9	179
UHRF1BP1L	UHRF1BP1L	A0JNW5	12q23.1	K950-m1	164.2		LKDPLLFKSASDTNL	0	9	178
UHRF1BP1	UHRF1BP1	Q6BDS2	6p21.31	K1072-m2	159.49		MLSLPPAKEPMAKTD	0	9	177
UHRF1	UHRF1	Q96T88	19p13.3	K650-m1	89.81		GKGKWKRKSAGGGPS	0	9	176
UGGT2	UGCGL2	Q9NYU1	13q32.1	K1343-m1	174.74	Glyco_transf_8	QIVRHDLKELRDFDL	0	9	175
UBXN6	UBXN6	Q9BZV1	19p13.3	K15-m1	49.75		FKADIKFKSAGPGQK	0	9	174
UBXN4	UBXN4	Q92575	2q21.3	K239-m1	56.78		GKEMLDYKRKQEEEL	0	9	172
UPF2	UPF2	Q9HAU5	10p14	K58-m3	147.81		KAPEDKKKRLEDDKR	0	9	181
UBXN2B	UBXN2B	Q14CS0	8q12.1	K55-m1	37.08		RPKATVFKSPRTPPQ	0	9	171
UBTFL6	UBTFL6	P0CB48	2q11.2	K288-m1	46.55		ELLQKEYKVELDLWL	0	9	170
UBTFL6	UBTFL6	P0CB48	2q11.2	K285-m1	46.55		SQAELLQKEYKVELD	0	9	169
UBR3	UBR3	Q6ZT12	2q31.1	K1424-m1	212.43		KEMESVMKDIKNTTQ	0	9	168
UBR3	UBR3	Q6ZT12	2q31.1	K1141-m1	212.43		AVERILLKAASQSRM	0	9	167
UBN2	UBN2	Q6ZU65	7q34	K1028-m1	146.09		QISTQGFKSPFSMAA	0	9	166
UNC13B	UNC13B	O14795	9p13.3	K577-m1	180.68		RDVFTVNKAAHVQQM	0	9	180
UPF2	UPF2	Q9HAU5	10p14	K1266-m1	147.81		PNADLIFKTGGRRRA	0	9	182
UBL5	UBL5	Q9BZL1	19p13.2	K17-m1	8.55	ubiquitin	LGKKVRVKCNTDDTI	0	9	164
USP20	USP20	Q9Y2K6	9q34.11	K553-m1	102	UCH	FFAADELKGDNMYSC	0	9	191
USP6NL	USP6NL	Q92738	10p14	K602-m1	94.1		SPSKVSNKFTFKVQP	0	9	197
USP54	USP54	Q70EL1	10q22.2	K542-m1	187.39		RGGDQPDKKPPRTLP	0	9	196
USP39	USP39	Q53GS9	2p11.2	K291-m1	65.38	UCH	LWNPRNFKAHVSPHE	0	9	195
USP36	USP36	Q9P275	17q25.3	K508-m2	122.65		QNGCIPPKLPSGSPS	0	9	194
USP32	USP32	Q8NFA0	17q23.1-q23.2	K274-m2	181.66	EF-hand_5	ERQKFCFKVFDVDRD	0	9	193
USP3	USP3	Q9Y6I4	15q22.31	K354-m1	58.9	UCH	QFRSKRSKNQENGPV	0	9	192
USP15	USP15	Q9Y4E8	12q14.1	K363-m1	112.42	UCH	YVTPRAFKTQVGRFA	0	9	190
UQCRC2	UQCRC2	P22695	16p12.2	K98-m1	48.44	Peptidase_M16	TKGASSFKITRGIEA	0	9	183
USP15	USP15	Q9Y4E8	12q14.1	K259-m1	112.42		NMNNRNVKNSNYCLP	0	9	189
USP11	USP11	P51784	Xp11.3	K383-m1	109.82	UCH	SIVPHVFKNKVGHFA	0	9	188
URGCP	URG4	Q8TCY9	7p13	K371-m1	104.99		NISKKEYKLLYSMKE	0	9	187
URB1	URB1	O60287	21q22.11	K89-m2	254.39	Npa1	FQLLSGEKRPESETM	0	9	186
URB1	URB1	O60287	21q22.11	K73-m2	254.39		DVVEGYIKISVECVE	0	9	185
URB1	URB1	O60287	21q22.11	K36-m1	254.39		ELTGVRFKAQLKDPQ	0	9	184
UBN1	UBN1	Q9NPG3	16p13.3	K573-m1	121.52	UBN_AB	MQARTLFKESRRGHG	0	9	165
UBTF	UBF	P17480	17q21.31	K254-m3	89.41	HMG_box	HKALEQRKEYEEIMR	0	9	163
TUBA1B	TUBA1B	P68363	12q13.12	K394-me	50.15		AWARLDHKFDLMYAK	0	9	129
TULP4	TULP4	Q9NRJ4	6q25.3	K997-m1	169		NNREATLKMAQLADS	0	9	137
TYW1B	TYW1B	Q6NUM6	7q11.22-q11.23	K124-m1	76.92	Flavodoxin_1	RFGKTYLKGMRDAVF	0	9	143
TYW1	TYW1	Q9NV66	7q11.21	K170-m1	83.7	Flavodoxin_1	RFGKTYLKGMRYAVF	0	9	142
TXNDC5	TXNDC5	Q8NBS9	6p24.3	K221-m1	47.63	Thioredoxin	APWCGHCKALAPTWE	0	9	141
NME8	TXNDC3 iso3	F8WEA2	7p14.1	K26-m2	6.39		TLQPFRDKCEPVFLF	0	9	140
TXN	TXN	P10599	9q31.3	K48-m1	11.74	Thioredoxin	FFHSLSEKYSNVIFL	0	9	139
TXN	TXN	P10599	9q31.3	K8-m1	11.74	Thioredoxin	MVKQIESKTAFQEAL	0	9	138
TUBGCP4	TUBGCP4	Q9UGJ1	15q15.3	K21-m1	76.09	Spc97_Spc98	GSIFTWNKRSGLQVS	0	9	136
U2AF1	U2AF1	Q01081	21q22.3	K175-m1	27.87	zf-CCCH	FCNFMHLKPISRELR	0	9	145
TUBB	TUBB	P07437	6p21.33	K58-m1	49.67	Tubulin	YNEATGGKYVPRAIL	0	9	135
TUBB	TUBB	P07437	6p21.33	K19-m2	49.67	Tubulin	CGNQIGAKFWEVISD	0	9	134
TUBAL3	TUBAL3	A6NHL2	10p15.1	K103-m1	49.91	Tubulin	PEQLLSGKEDAANNY	0	9	133
TUBA8	TUBA8	Q9NY65	22q11.21	K124-m2	50.09	Tubulin	LVLDRIRKLTDACSG	0	9	132
TUBA4A	TUBA4A	P68366	2q35	K124-m2	49.92	Tubulin	PVLDRIRKLSDQCTG	0	9	131
TUBA3C	TUBA3C	P0DPH7	13q12.11	K163-m1	49.96	Tubulin	RLSVDYGKKSKLEFA	0	9	130
U2AF1	U2AF1	Q01081	21q22.3	K39-m1	27.87	zf-CCCH	RCSRLHNKPTFSQTI	0	9	144
U2AF2	U2AF2	P26368	19q13.42	K195-m1	53.5	RRM_1	AVQINQDKNFAFLEF	0	9	146
UBTF	UBF	P17480	17q21.31	K232-m3	89.41	HMG_box	EVKDSLGKQWSQLSD	0	9	162
UBB	UBB	P0CG47	17p11.2	K82-m1	25.76	ubiquitin	GGMQIFVKTLTGKTI	0	9	155
UBE2M	UBE2M	P61081	19q13.43	K61-m2	20.9	UQ_con	PDDLLNFKLVICPDE	0	9	161
UBE2K	UBE2K	P61086	4p14	K18-m1	22.41	UQ_con	REFKEVLKSEETSKN	0	9	160
UBE2E2	UBE2E2	Q96LR5	3p24.3	K52-m2	22.26		ISSKTAAKLSTSAKR	0	9	159
UBE2E2	UBE2E2	Q96LR5	3p24.3	K44-m2	22.26		QPKKKEGKISSKTAA	0	9	158
UBE2C	UBE2C	O00762	20q13.12	K18-m1	19.65		TSVAAARKGAEPSGG	0	9	157
UBA1	UBE1	P22314	Xp11.3	K304-m1	117.85	ThiF; E1_4HB	VPKKISFKSLVASLA	0	9	156
UBA52	UBA52	P62987	19p13.11	K98-m1	14.73	Ribosomal_L40e	CDKMICRKCYARLHP	0	9	154
SNRNP200	U5-200kD	O75643	2q11.2	K14-m1	244.51		RSLQYEYKANSNLVL	0	9	147
UBA3	UBA3	Q8TBC4	3p14.1	K10-m1	51.85		DGEEPEKKRRRIEEL	0	9	153
UBA3	UBA3	Q8TBC4	3p14.1	K9-m1	51.85		ADGEEPEKKRRRIEE	0	9	152
UACA	UACA	Q9BZF9	15q23	K504-m2	162.51		DALKDVQKRMYESEG	0	9	151
UACA	UACA	Q9BZF9	15q23	K493-m1	162.51		EDSDEQIKQLEDALK	0	9	150
SNRNP200	U5-200kD	O75643	2q11.2	K804-m1	244.51	Helicase_C	VEDLFADKHIQVLVS	0	9	149
SNRNP200	U5-200kD	O75643	2q11.2	K479-m1	244.51		QAGFEGFKTLNRIQS	0	9	148
TRABD2A	TRABD2A	Q86V40	2p11.2	K181-m1	57.68	TraB	SLTEVDIKSRGVPVL	0	9	55
TPX2	TPX2	Q9ULW0	20q11.21	K604-m1	85.65		TDRRGALKAQTWKHQ	0	9	54
TPT1	TPT1	P13693	13q14.13	K130-m1	19.6	TCTP	KHILANFKNYQFFIG	0	9	53
THOC1	Tho1	Q96FV9	18p11.32	K425-m1	75.67	efThoc1	APEDFLGKGPTKKIL	0	8	552
THUMPD2	THUMPD2	Q9BTF0	2p22.1|2p22-p21	K136-m1	56.43	THUMP	DDNQLKRKVGENEII	0	8	558
THUMPD2	THUMPD2	Q9BTF0	2p22.1|2p22-p21	K134-m1	56.43	THUMP	QRDDNQLKRKVGENE	0	8	557
THUMPD1	THUMPD1	Q9NXG2	16p12.3	K26-m1	39.32		KAQYVLAKRARRCDA	0	8	556
THSD4	THSD4	Q6ZMP0	15q23	K724-m1	112.45	TSP_1	YRCQHLEKPETTSTC	0	8	555
ALYREF	THOC4	Q86V81	17q25.3	K235-m1	26.89	FoP_duplication	RGAGRNSKQQLSAEE	0	8	554
THOC3	THOC3	Q96J01	5q35.2	K77-m1	38.77	WD40	LASGSFDKTASVFLL	0	8	553
THEG	THEG	Q9P2T0	19p13.3	K135-m2	43.44		LMELAEPKINWQVLK	0	8	551
TIA1	TIA1	P31483	2p13.3	K139-m1	42.96	RRM_1	ISDARVVKDMATGKS	0	8	560
THAP9	THAP9	Q9H5L6	4q21.22	K880-m1	103.41		WSSVQDYKCSSFANT	0	8	550
THAP9	THAP9	Q9H5L6	4q21.22	K667-m3	103.41		DISIARRKDLALWTV	0	8	549
THAP1	THAP1 iso2	Q9NVV9-2	8p11.21	K25-m1	6.49		KPVSFHKKKIFWSHR	0	8	548
TGFB3	TGFB3	P10600	14q24.3	K162-m3	47.33	TGFb_propeptide	RVPNPSSKRNEQRIE	0	8	547
BDP1	TFNR	A6H8Y1	5q13.2	K359-m1	293.89	Myb_DNA-bind_7	IDKAFQEKRPFDFDF	0	8	546
BDP1	TFNR	A6H8Y1	5q13.2	K354-m1	293.89	Myb_DNA-bind_7	TNGWRIDKAFQEKRP	0	8	545
THUMPD2	THUMPD2	Q9BTF0	2p22.1|2p22-p21	K148-m1	56.43	THUMP	EIIAKKLKIEQMQKI	0	8	559
TIAM1	TIAM1	Q13009	21q22.11	K887-m1	177.51	PDZ	ETGLASKKGLKAGDE	0	8	561
TCEA1	TFIIS	P23193	8q11.23	K242-m1	33.97	TFIIS_M	EMRKNLTKEAIREHQ	0	8	543
TIMP4	TIMP4	Q99727	3p25.2	K86-m1	25.5	TIMP	KMFKGFEKVKDVQYI	0	8	570
TTN	Titin	Q8WZ42	2q31.2	K25023-m2	3816.03	I-set	DAGKYILKLENSSGS	0	8	577
TTN	Titin	Q8WZ42	2q31.2	K25000-m2	3816.03	I-set	TDKVQIEKGVNYTQL	0	8	576
TTN	Titin	Q8WZ42	2q31.2	K22427-m2	3816.03	I-set	MEWSKDGKELEGTAK	0	8	575
TTN	Titin	Q8WZ42	2q31.2	K17400-m2	3816.03	fn3	EWEKGKDKEVRGTKL	0	8	574
TTN	Titin	Q8WZ42	2q31.2	K11528-m1	3816.03		VPAAPPKKPEVTPVK	0	8	573
TINF2	TINF2	Q9BSI4	14q12	K101-m1	50.02	TINF2_N	VRDPKATKQDLRKIL	0	8	572
TIGD7	TIGD7	Q6NT04	16p13.3	K15-m1	63.24	CENP-B_N	TTLNLEEKMKVLSRI	0	8	569
TIAM1	TIAM1	Q13009	21q22.11	K1397-m3	177.51		VHSILRDKHRRQLLK	0	8	562
TIGD5	TIGD5	Q53EQ6	8q24.3	K93-m1	69.22	CENP-B_N	GTLRGWLKDEPKLRW	0	8	568
TIGAR	TIGAR	Q9NQ88	12p13.32	K37-m1	30.06	His_Phos_1	PLSETGFKQAAAAGI	0	8	567
TICRR	TICRR	Q7Z2Z1	15q26.1	K715-m3	210.86	Treslin_N	KKLDKEDKVRECQLQ	0	8	566
TICRR	TICRR	Q7Z2Z1	15q26.1	K712-m3	210.86	Treslin_N	NLGKKLDKEDKVREC	0	8	565
TIAM2	TIAM2	Q8IVF5	6q25.2-q25.3	K1480-m1	190.1		KDRLVPLKNRVPVSA	0	8	564
TIAM2	TIAM2	Q8IVF5	6q25.2-q25.3	K69-m1	190.1		RSCLSHFKSNQPYAS	0	8	563
TFIP11	TFIP11	Q9UBB9	22q12.1	K69-m1	96.82	TIP_N	ERPSFGGKRARDYSA	0	8	544
TFE3	TFE3	P19532	Xp11.23	K178-m1	61.52	MITF_TFEB_C_3_N	QVPREVLKVQTHLEN	0	8	542
TPR	TPR	P12270	1q31.1	K1603-m1	267.29		DVRITALKSQYEGRI	0	9	52
TCERG1	TCERG1	O14776	5q32	K729-m1	123.9	FF	KNKIMQAKEDFKKMM	0	8	516
RCC2	TD-60	Q9P258	1p36.13	K293-m1	56.08	RCC1	LGHNSDGKFIARAQR	0	8	522
RCC2	TD-60	Q9P258	1p36.13	K4-m1	56.08		AAAAMPRKKAAAAAW	0	8	521
GCFC2	TCF9	P16383	2p12	K79-m1	89.38		ASSRRATKAAPRADE	0	8	520
TCF25	TCF25	Q9BQ70	16q24.3	K545-m1	76.67	Tcf25	EACENRRKVLYQRAP	0	8	519
TCF25	TCF25	Q9BQ70	16q24.3	K192-m1	76.67		LNPDTELKRYFGARA	0	8	518
TCERG1	TCERG1	O14776	5q32	K734-m1	123.9	FF	QAKEDFKKMMEEAKF	0	8	517
ELOA2	TCEB3B	Q8IYF1	18q21.1	K26-m2	83.92		ATKTEPKKLEKYLQK	0	8	515
TARDBP	TDP-43	Q13148	1p36.22	K181-m1	44.74		DCKLPNSKQSQDEPL	0	8	524
ELOA	TCEB3	Q14241	1p36.11	K38-m1	89.91		SALQVVEKLQARLAA	0	8	514
TCEAL3	TCEAL3	Q969E4	Xq22.2	K158-m1	22.5	BEX	EELRKKQKMGGFHWM	0	8	513
TAF8	TBN iso4	Q7Z7C8-4	6p21.1	K287-m1	37.41		QPPPPGFKRFSSLSL	0	8	512
TBL3	TBL3	Q12788	16p13.3	K804-m1	89.03		PTPWETHKGALPAAA	0	8	511
TBL3	TBL3	Q12788	16p13.3	K12-m1	89.03		AAGVGRFKTNYAVER	0	8	510
TBL2	TBL2	Q9Y4P3	7q11.23	K417-m1	49.8		EEMQGHLKRASNEST	0	8	509
RCC2	TD-60	Q9P258	1p36.13	K513-m1	56.08		TEKEKIKKLPEYNPR	0	8	523
TDRD9	TDRD9	Q8NDG6	14q32.33	K1168-m2	155.68		HSLTRISKFRCVWIE	0	8	525
TFAM	TFAM	Q00059	10q21.1	K147-m3	29.1		RKAMTKKKELTLLGK	0	8	541
TNS3	tensin 3	Q68CZ2	7p12.3	K797-m1	155.27		FSKCAWGKAGVDYAP	0	8	534
TFAM	TFAM	Q00059	10q21.1	K146-m3	29.1		KRKAMTKKKELTLLG	0	8	540
TFAM	TFAM	Q00059	10q21.1	K69-m1	29.1	HMG_box	KEQLPIFKAQNPDAK	0	8	539
TEX10	TEX10	Q9NXF1	9q31.1	K36-m1	105.67		TPTNFKTKTIHLPEQ	0	8	538
TEX10	TEX10	Q9NXF1	9q31.1	K34-m1	105.67		NATPTNFKTKTIHLP	0	8	537
TES	TES	Q9UGI8	7q31.2	K88-m1	48		SDGIPMYKRNVMILT	0	8	536
TES	TES	Q9UGI8	7q31.2	K80-m1	48		TTLIAKLKSDGIPMY	0	8	535
TEFM	TEFM	Q96QE5	17q11.2	K124-m1	41.68	HHH_3	NVPLFKYKSTVQVCN	0	8	533
TDRP	TDRP	Q86YL5	8p23.3	K3-m1	20.4		AAAAAMWKLGRGRVL	0	8	526
TEFM	TEFM	Q96QE5	17q11.2	K122-m1	41.68	HHH_3	LMNVPLFKYKSTVQV	0	8	532
PTGES3	TEBP	Q15185	12q13.3|12	K48-m1	18.7	CS	LGGSDNFKHLNEIDL	0	8	531
PTGES3	TEBP	Q15185	12q13.3|12	K33-m1	18.7	CS	DVNVNFEKSKLTFSC	0	8	530
TEAD1	TEAD1	P28347	11p15.3	K101-m2	47.95	TEA	IQVLARRKSRDFHSK	0	8	529
TEAD1	TEAD1	P28347	11p15.3	K83-m1	47.95	TEA	YIKLRTGKTRTRKQV	0	8	528
TDRP	TDRP	Q86YL5	8p23.3	K145-m1	20.4	TDRP	DDAKGSTKYTSLASS	0	8	527
TTN	Titin	Q8WZ42	2q31.2	K28031-m2	3816.03	fn3	ISGYFLEKRDKKSLG	0	8	578
TTN	Titin	Q8WZ42	2q31.2	K28034-m2	3816.03	fn3	YFLEKRDKKSLGWFK	0	8	579
TTN	Titin	Q8WZ42	2q31.2	K33281-m1	3816.03		KAALKTQKTSERKYE	0	8	580
TOP2B	TOP2B	Q02880	3p24.2	K421-m1	183.27	DNA_gyraseB	QLSEKFFKAASNCGI	0	9	26
TP53I11	TP53I11	O14683	11p11.2	K43-m1	21.05	p53-inducible11	DGEVHRSKISQVLGN	0	9	33
TOPBP1	TOPBP1	Q92547	3q22.1	K1412-m1	170.68		QSREAGFKRLLQSGG	0	9	32
TOPAZ1	TOPAZ1	Q8N9V7	3p21.31	K1132-m1	190.93		VCMDVFKKYININEL	0	9	31
TOPAZ1	TOPAZ1	Q8N9V7	3p21.31	K1131-m1	190.93		KVCMDVFKKYININE	0	9	29
TOP2B	TOP2B	Q02880	3p24.2	K587-m2	183.27	Toprim	HNWPSLLKHGFLEEF	0	9	28
TOP2B	TOP2B	Q02880	3p24.2	K439-m1	183.27	DNA_gyraseB	ILNWVKFKAQTQLNK	0	9	27
TOP2B	TOP2B	Q02880	3p24.2	K412-m1	183.27	DNA_gyraseB	QPKSFGSKCQLSEKF	0	9	25
TPD52L2	TPD52L2	O43399	20q13.33	K90-m1	22.24	TPD52	LSTLGELKQNLSRSW	0	9	35
TOP2A	TOP2A	P11388	17q21.2	K1283-m1	174.39		KQTTLAFKPIKKGKK	0	9	24
TOP2A	TOP2A	P11388	17q21.2	K936-m1	174.39	DNA_topoisoIV	RTWTQTYKEQVLEPM	0	9	23
TOP2A	TOP2A	P11388	17q21.2	K639-m1	174.39	TOPRIM_C	KRHRIQFKYSGPEDD	0	9	22
TOP1MT	TOP1MT	Q969P6	8q24.3	K210-m1	69.87	Topoisom_I_N	HPKMGMLKRRITPED	0	9	21
1	1	P11387	20q12	K471-m1	90.73	Topoisom_I	DWKSKEMKVRQRAVA	0	9	20
1	1	P11387	20q12	K466-m1	90.73	Topoisom_I	NQYREDWKSKEMKVR	0	9	19
TPD52L1	TPD52L1	Q16890	6q22.31	K123-m1	22.45	TPD52	NVGTAISKKFGDMSY	0	9	34
TPD52L2	TPD52L2	O43399	20q13.33	K165-m1	22.24	TPD52	MRNSATFKSFEDRVG	0	9	36
SH3PXD2A	Tks5	Q5TCZ1	10q24.33	K959-m1	125.29		KPPGGFGKTSGTPAV	0	8	581
TPP2	TPP2	P29144	13q33.1	K467-m1	138.35	Peptidase_S8	ALILSGLKANNIDYT	0	9	45
TPR	TPR	P12270	1q31.1	K1326-m3	267.29		GMLQAEKKLLEEDVK	0	9	51
TPR	TPR	P12270	1q31.1	K1265-m3	267.29		QHEELMKKTETMNVV	0	9	50
TPR	TPR	P12270	1q31.1	K1105-m2	267.29	TPR_MLP1_2	AAKEQVSKMASVRQH	0	9	49
TPR	TPR	P12270	1q31.1	K124-m1	267.29		KEELEAEKRDLIRTN	0	9	48
TPR	TPR	P12270	1q31.1	K117-m1	267.29		QSQFTRTKEELEAEK	0	9	47
TPPP	TPPP	O94811	5p15.33	K78-m2	23.69	p25-alpha	MHGKNWSKLCKDCQV	0	9	46
TPP2	TPP2	P29144	13q33.1	K136-m1	138.35	Peptidase_S8	IQKERKEKIWDPVHR	0	9	44
TPI1	TPI1	P60174	12p13.31	K51-m1	30.79	TIM	FFVGGNWKMNGRKQS	0	9	37
TPM4	TPM4	P67936	19p13.12-p13.11	K184-m1	28.52	Tropomyosin	KYSEKEDKYEEEIKL	0	9	43
TPM3	TPM3	P06753	1q21.3	K221-m1	32.95	Tropomyosin	KYSQKEDKYEEEIKI	0	9	42
TPM2	TPM2	P07951	9p13.3	K220-m1	32.85	Tropomyosin	KYSTKEDKYEEEIKL	0	9	41
TPM1	TPM1	P09493	15q22.2	K161-m1	32.71	Tropomyosin	IAEDADRKYEEVARK	0	9	40
TPI1	TPI1	P60174	12p13.31	K231-m1	30.79	TIM	EKLRGWLKSNVSDAV	0	9	39
TPI1	TPI1	P60174	12p13.31	K106-m1	30.79	TIM	VAAQNCYKVTNGAFT	0	9	38
1	1	P11387	20q12	K374-m1	90.73	Topoisom_I_N	HPKMGMLKRRIMPED	0	9	18
TNRC6B	TNRC6B	Q9UPQ9	22q13.1	K1051-m1	194	Ago_hook	KQMKCSLKGGNNDSW	0	9	17
TNRC6A	TNRC6A	Q8NDV7	16p12.1	K1237-m1	210.3		SGGMLQDKRMEIDKH	0	9	16
TMEM200B	TMEM200B	Q69YZ2	1p35.3	K227-m1	32.75		LLNSYPLKGPGLPPP	0	8	589
TMPO	TMPO	P42167	12q23.1	K207-m1	50.67		EPLKGRAKTPVTLKQ	0	8	595
TMF1	TMF1	P82094	3p14.1	K121-m1	122.84		VVSKPPAKSQRPEEE	0	8	594
TMEM268	TMEM268	Q5VZI3	9q32	K158-m3	37.57	DUF4481	VFERHQKKANTNTDL	0	8	593
TMEM245	TMEM245 iso2	Q9H330-2	9q31.3	K875-m1	97.36		RDISEDLKSSVGAAA	0	8	592
TMEM214	TMEM214	Q6NUQ4	2p23.3	K69-m1	77.15	TMEM214	RGFENIMKRQNKEQV	0	8	591
TMEM207	TMEM207	Q6UWW9	3q28	K144-m1	16.12		PPYEEIVKTTAAAAA	0	8	590
TMEM132A	TMEM132A iso3	Q24JP5-3	11q12.2	K393-m1	44.36		RALIPLAKVRRPPSL	0	8	588
CNPY3	TNRC5	Q9BT09	6p21.1	K225-m2	30.75		TAALGGKKSKKKSSR	0	9	15
EMC3	TMEM111	Q9P0I2	3p25.3	K216-m1	29.95		AMPADTNKAFKTEWE	0	8	587
TMC5	TMC5	Q6UXY8	16p12.3	K31-m1	114.8		NRTQGYLKTQGYPDV	0	8	586
TLR1	TLR1	Q15399	4p14	K416-m3	90.29		SVSYDEKKGDCSWTK	0	8	585
TLE3	TLE3	Q04726	15q23	K19-m1	83.42	TLE_N	QPGQPGFKFTVAESC	0	8	584
TLE1	TLE1	Q04724	9q21.32	K343-m1	83.2		GLRPGLGKPPAIDPL	0	8	583
TKT	TKT	P29401	3p21.1	K204-m1	67.88	Transketolase_N	HQMDIYQKRCEAFGW	0	8	582
TMPO	TMPO	P42167	12q23.1	K303-m1	50.67		NRVTGNFKHASPILP	0	8	596
TMPO	TMPO iso6	P42166	12q23.1	K281-m1	75.49		RNLFISCKSSHDRCL	0	8	597
TMPO	TMPO iso6	P42166	12q23.1	K674-m1	75.49	LAP2alpha	KLASTPFKGGTLFGG	0	8	598
TMSB10	TMSB10	P63313	2p11.2	K4-m3	5.03	Thymosin	AAAAMADKPDMGEIA	0	8	599
TMSB10	TMSB10	P63313	2p11.2	K15-m1	5.03	Thymosin	GEIASFDKAKLKKTE	0	9	2
TMSB4X	TMSB4X	P62328	Xp22.2	K4-m3	5.05	Thymosin	AAAAMSDKPDMAEIE	0	9	3
TNIP3	TNIP3	Q96KP6	4q27	K39-m3	38.94		LMNSLEQKIRCLEKQ	0	9	4
TNK1	TNK1	Q13470	17p13.1	K475-m1	72.47		SIDGDRKKANLWDAP	0	9	5
TNKS1BP1	TNKS1BP1	Q9C0C2	11q12.1	K2-m1	181.8		AAAAAAMKVSTLRES	0	9	6
TNKS1BP1	TNKS1BP1	Q9C0C2	11q12.1	K173-m1	181.8		AKMEQPRKEVLASPD	0	9	7
TNKS1BP1	TNKS1BP1	Q9C0C2	11q12.1	K954-m1	181.8		PQEQEFGKSAWIRDY	0	9	8
TNKS1BP1	TNKS1BP1	Q9C0C2	11q12.1	K1641-m1	181.8	Tankyrase_bdg_C	TRMSLGTKGLKVNLF	0	9	9
TNKS1BP1	TNKS1BP1	Q9C0C2	11q12.1	K1644-m1	181.8	Tankyrase_bdg_C	SLGTKGLKVNLFPGL	0	9	10
TNKS1BP1	TNKS1BP1	Q9C0C2	11q12.1	K1657-m1	181.8	Tankyrase_bdg_C	GLSPSALKAKLRPRN	0	9	11
TNNI3	TNNI3	P19429	19q13.42	K40-m3	24.01		PHAKKKSKISASRKL	0	9	12
GIGYF2	TNRC15	Q6Y7W6	2q37.1	K37-m1	150.07		SPALPKYKLADYRYG	0	9	13
TNRC18	TNRC18	O15417	7p22.1	K1779-m1	314.52		AGGPKLTKRGLAAPR	0	9	14
USP7	USP7	Q93009	16p13.2	K841-m1	128.3	USP7_ICP0_bdg	PMLLQFFKSQGYRDG	0	9	198
USP8	USP8	P40818	15q21.2	K1012-m1	127.52	UCH	PVLLVHLKRFSYDGR	0	9	199
UTP11	UTP11L	Q9Y3A2	1p34.3	K108-m1	30.45	Utp11	DVKYIEMKRVAEAKK	0	9	200
ZNF319	ZNF319	Q9P2F9	16q21	K496-m3	65.55		PDCEKRFKYASDLQR	0	9	391
ZNF366	ZNF366	Q8N895	5q13.2|5q13.2	K316-m2	85.11	zf-C2H2	HKCQVCHKAFTQTSH	0	9	397
RNF115	ZNF364	Q9Y4L5	1q21.1	K26-m2	33.7		RFFCHFCKGEVSPKL	0	9	396
ZNF337	ZNF337	Q9Y3M9	20p11.21	K733-m1	86.87	zf-C2H2	SYYSKHLKRHLREKR	0	9	395
ZNF326	ZNF326	Q5BKZ1	1p22.2	K364-m2	65.65	AKAP95	LHECMVNKFKKTSIR	0	9	394
ZNF326	ZNF326	Q5BKZ1	1p22.2	K238-m2	65.65		VAAARGIKRKMMQPF	0	9	393
ZNF326	ZNF326	Q5BKZ1	1p22.2	K166-m1	65.65		SFSSPHMKPAPVGSR	0	9	392
ZNF319	ZNF319	Q9P2F9	16q21	K212-m1	65.55	zf-C2H2	PICQKPFKHLSELSR	0	9	390
ZNF41	ZNF41	P51814	Xp11.3	K656-m2	93.73	zf-C2H2	YVCPECGKAFIQKSH	0	9	399
ZNF318	ZNF318	Q5VUA4	6p21.1	K1864-m1	251.11		PQACSFTKAKLDSFL	0	9	389
ZKSCAN3	ZNF306	Q9BRR0	6p22.1	K82-m1	60.64	SCAN	LQPEMHSKEQILELL	0	9	388
ZNF280C	ZNF280C	Q8ND82	Xq26.1	K174-m1	83.1	DUF4195	KNTSYVLKHPSTSKV	0	9	387
ZRANB2	ZNF265	O95218	1p31.1	K137-m1	37.4		KKKKYRGKAVGPASI	0	9	386
ZMYM4	ZNF262	Q5VZL5	1p34.3	K195-m1	172.79		KDLDSRLKSSFFDKA	0	9	385
ZMYM3	ZNF261	Q14202	Xq13.1	K1273-m1	152.38	DUF3504	GRDTGPGKRKREDEA	0	9	384
ZNF394	ZNF394	Q53GI3	7q22.1	K486-m1	64.26	zf-C2H2	KQRSDLFKHHRIHTG	0	9	398
ZNF414	ZNF414	Q96IQ9	19p13.2	K177-m1	32.78	zf-C2H2_8	YKPNRYFKCENCLLR	0	9	400
ZNF232	ZNF232	Q9UNY5	17p13.2	K314-m1	47.69	zf-C2H2	SDCGKTFKQSSNLGQ	0	9	382
ZNF449	ZNF449	Q6P9G9	Xq26.3	K315-m2	59.93		LNPKPHKKKSPGEKP	0	9	409
ZNF462	ZNF462	Q96JM2	9q31.2	K2062-m1	284.69		RCKLCSFKSSYNSRL	0	9	415
ZNF462	ZNF462	Q96JM2	9q31.2	K2004-m1	284.69		PAVSAAVKGLRSHER	0	9	414
ZNF462	ZNF462	Q96JM2	9q31.2	K1780-m1	284.69		SFQSFSKKGIVSHYM	0	9	413
ZNF462	ZNF462	Q96JM2	9q31.2	K1698-m1	284.69		EGKNNLFKCALCAYT	0	9	412
ZNF462	ZNF462	Q96JM2	9q31.2	K674-m1	284.69		SKNNFVAKASRKLAN	0	9	411
ZNF45	ZNF45	Q02386	19q13.31	K218-m1	78.24		QRVHSRAKSYTNDAS	0	9	410
ZNF443	ZNF443	Q9Y2A4	19p13.2	K539-m2	77.52	zf-C2H2	YECKTCRKAFGHYDN	0	9	408
ZSCAN32	ZNF434	Q9NX65	16p13.3	K416-m1	78.73		NRLGFEFKNEIKKEN	0	9	401
ZNF442	ZNF442	Q9H7R0	19p13.2	K570-m1	72.86		ERIHTGKKSYECQQC	0	9	407
ZNF436	ZNF436	Q9C0F3	1p36.12	K465-m1	54.28	zf-C2H2	SSALIKHKRVHTDAA	0	9	406
ZSCAN32	ZNF434 iso4	I3L2L7	16p13.3	K421-m1	47.91		TPLALMVKGWQSPLA	0	9	405
ZSCAN32	ZNF434 iso4	I3L2L7	16p13.3	K400-m1	47.91		NPGQEVRKLDLPVLF	0	9	404
ZSCAN32	ZNF434	Q9NX65	16p13.3	K421-m1	78.73		EFKNEIKKENLKWDD	0	9	403
ZSCAN32	ZNF434	Q9NX65	16p13.3	K420-m1	78.73		FEFKNEIKKENLKWD	0	9	402
ZNF24	ZNF24	P17028	18q12.2	K361-m1	42.16		QRRHNAEKLLNVVKV	0	9	383
ZNF211	ZNF211	Q13398	19q13.43	K348-m1	64.54	zf-C2H2	YECGECGKSFSQRSN	0	9	381
ZC3H11A	ZC3H11A	O75152	1q32.1	K288-m1	89.13		TERLGKRKFSAGGDS	0	9	346
ZC3H8	ZC3H8	Q8N5P1	2q14.1	K71-m1	33.58		LHRKSRSKDYDVYSD	0	9	355
ZDBF2	ZDBF2	Q9HCK1	2q33.3	K1957-m3	265.62		CKNYPVMKRKIIRQE	0	9	361
ZDBF2	ZDBF2	Q9HCK1	2q33.3	K287-m1	265.62		KTLSAGLKFHERMGT	0	9	360
ZCCHC7	ZCCHC7	Q8N3Z6	9p13.2	K412-m3	63.05		GVIPEPSKLPYIKAA	0	9	359
ZCCHC7	ZCCHC7	Q8N3Z6	9p13.2	K403-m3	63.05		QKIKVLKKNGVIPEP	0	9	358
ZC4H2	ZC4H2	Q9NQZ6	Xq11.2	K28-m3	26.24	zf-C4H2	TLQMEKIKARLKAEF	0	9	357
ZC4H2	ZC4H2	Q9NQZ6	Xq11.2	K20-m3	26.24	zf-C4H2	SIKEIRNKTLQMEKI	0	9	356
ZC3H18	ZC3H18 iso2	Q86VM9-2	16q24.2	K253-m1	84.1		IPFRGQVKGNCTWGM	0	9	354
ZDHHC5	ZDHHC5	Q9C0B5	11q12.1	K414-m1	77.54		FRSPTFGKSFHFDPL	0	9	363
ZC3H18	ZC3H18	Q86VM9	16q24.2	K510-m1	106.38		ATTGPQVKRADEWKD	0	9	353
ZC3H18	ZC3H18	Q86VM9	16q24.2	K248-m1	106.38		IHPGVNDKGNYSLIT	0	9	352
ZC3H18	ZC3H18	Q86VM9	16q24.2	K229-m1	106.38		PTCRFFMKGNCTWGM	0	9	351
ZC3H14	ZC3H14	Q6PJT7	14q31.3	K489-m1	82.88		PNQESGMKTADSLRV	0	9	350
ZC3H13	ZC3H13	Q5T200	13q14.13	K68-m1	196.64		HGPSPRGKGYSSNYR	0	9	349
ZC3H13	ZC3H13	Q5T200	13q14.13	K47-m1	196.64	zf-CCCH	TQCRNWLKTGNCLYG	0	9	348
ZDHHC1	ZDHHC1	Q8WTX9	16q22.1	K292-m2	54.82		HRPPQEAKGVHRELE	0	9	362
ZDHHC5	ZDHHC5	Q9C0B5	11q12.1	K431-m1	77.54		GSRSSSLKSAQGTGF	0	9	364
ZNF148	ZNF148	Q9UQR1	3q21.2	K291-m1	88.98		KLNRCAIKGGLLTSE	0	9	380
ZGRF1	ZGRF1 iso6	Q86YA3-6	4q25	K866-m3	102.96		KTVKKKIKPTLPLRI	0	9	373
ZNF143	ZNF143	P52747	11p15.4	K309-m1	68.9	zf-C2H2	DNCTKSFKTSGDLQK	0	9	379
ZNF133	ZNF133	P52736	20p11.23	K541-m1	73.39	zf-C2H2	QAGLIRHKRKHSREK	0	9	378
ZNF131	ZNF131	P52739	5p12	K372-m1	71.42		FARNSTLKCHLTACQ	0	9	377
ZNF121	ZNF121	P58317	19p13.2	K69-m1	44.69		SVLNQCRKAFSLPPN	0	9	376
ZMIZ2	ZIMP7	Q8NF64	7p13	K266-m1	96.54		PLPRQGVKRTYSEVY	0	9	375
ZHX3	ZHX3	Q9H4I2	20q12	K510-m1	104.66	Homeobox	HEQLSALKGSFCRNQ	0	9	374
ZGRF1	ZGRF1 iso6	Q86YA3-6	4q25	K864-m3	102.96		QQKTVKKKIKPTLPL	0	9	372
ZDHHC8	ZDHHC8	Q9ULC8	22q11.21	K300-me	81.44		GLGRSKSKGSLDRLD	0	9	365
ZGPAT	ZGPAT	Q8N5A5	20q13.33	K442-m1	57.36		APAGRRSKDMYHASK	0	9	371
ZFP91	ZFP91	Q96JP5	11q12.1	K174-m1	63.45		NTRSSRSKTGSLQLI	0	9	370
ZFP64	ZFP64 iso5	Q9NTW7-5	20q13.2	K232-m1	74.64	zf-C2H2	HSDERPFKCQICPYA	0	9	369
ZFP2	ZFP2	Q6ZN57	5q35.3	K299-m3	52.74	zf-C2H2	HTGEKPYKCNKCGKS	0	9	368
ZNF106	ZFP106	Q9H2Y7	15q15.1	K574-m1	208.88		RNVEESEKGSLKIEF	0	9	367
ZDHHC8	ZDHHC8	Q9ULC8	22q11.21	K720-m1	81.44		QLKTPPSKLNGQSPG	0	9	366
ZNF462	ZNF462	Q96JM2	9q31.2	K2131-m1	284.69		HSHHSSQKATPAEEV	0	9	416
ZNF469	ZNF469	Q96JG9	16q24.2	K3673-m3	410.2		KFPVHPRKAVGSLAP	0	9	417
ZNF469	ZNF469	Q96JG9	16q24.2	K3791-m1	410.2		ESSTKRKKGQVPGPA	0	9	418
ZNF804B	ZNF804B	A4D1E1	7q21.13	K113-m1	152.57		KKQEKALKRLHQLAE	0	9	463
ZNF846	ZNF846	Q147U1	19p13.2	K140-m1	60.55		MITHIGEKTSEDNQS	0	9	469
ZNF843	ZNF843	Q8N446	16p11.2	K34-m1	37.07		TQGRQPCKCKACGRG	0	9	468
CHAMP1	ZNF828	Q96JM3	13q34	K556-m1	89.1		ALFPEPRKHALFPEL	0	9	467
CHAMP1	ZNF828	Q96JM3	13q34	K371-m1	89.1		SVSSASWKSSSVSPS	0	9	466
ZNF821	ZNF821	O75541	16q22.2	K330-m1	46.79		DREAMRLKRANETPE	0	9	465
ZNF81	ZNF81	P51508	Xp11.23	K258-m1	75.96		CGKVLSLKHSLSQNV	0	9	464
ZNF804A	ZNF804A	Q7Z570	2q32.1	K771-m2	136.89		ESERFYRKRRQHSHS	0	9	462
ZNF846	ZNF846	Q147U1	19p13.2	K252-m2	60.55		GRIHSGEKPYVCKEC	0	9	471
ZNF804A	ZNF804A	Q7Z570	2q32.1	K125-m2	136.89		HKLAELRKETVCAPG	0	9	461
ZNF804A	ZNF804A	Q7Z570	2q32.1	K119-m2	136.89		KALQRLHKLAELRKE	0	9	460
ZNF8	ZNF8	P17098	19q13.43	K522-m1	64.97		HQHPNSRKSSAGGAK	0	9	459
ZNF792	ZNF792	Q3KQV3	19q13.11	K467-m1	71.58	zf-C2H2	SRSSDLMKHQRVHTG	0	9	457
ZNF780A	ZNF780A	O75290	19q13.2	K527-m1	74.53		QKTHTGEKPFECKEC	0	9	456
ZNF780A	ZNF780A	O75290	19q13.2	K521-m1	74.53	zf-C2H2	LQLSQHQKTHTGEKP	0	9	455
ZNF846	ZNF846	Q147U1	19p13.2	K149-m1	60.55		SEDNQSGKALRKNFP	0	9	470
ZNF846	ZNF846	Q147U1	19p13.2	K257-m2	60.55	zf-C2H2	GEKPYVCKECGKAFT	0	9	472
ZNF483	ZNF483	Q8TF39	9q31.3	K336-m2	85.1		SRRYNESKKPFSFHS	0	9	419
ZRANB3	ZRANB3	Q5FWF4	2q21.3	K218-m1	123.25	SNF2_N	GRWTDYAKRYCNAHI	0	9	481
ZYX	Zyxin	Q15942	7q34	K272-m1	61.28		KFSPVTPKFTPVASK	0	9	487
ZYX	Zyxin	Q15942	7q34	K201-m1	61.28		TAPLPPWKSPSSSQP	0	9	486
ZYX	Zyxin	Q15942	7q34	K165-m1	61.28		MTKNDPFKARVSSGY	0	9	485
ZYX	Zyxin	Q15942	7q34	K25-m2	61.28		AFYAPQKKFGPVVAP	0	9	484
ZSCAN5A	ZSCAN5	Q9BUG6	19q13.43	K256-m3	55.87		LVRAKEGKDPPKIAS	0	9	483
ZSCAN21	ZSCAN21	Q9Y5A6	7q22.1	K349-m1	53.66	zf-C2H2	GQSSDLLKHQRMHTE	0	9	482
TJP2	ZO2	Q9UDY2	9q21.11	K730-m1	133.96		LLREAGFKRPVVLFG	0	9	480
ZNF846	ZNF846	Q147U1	19p13.2	K261-m2	60.55	zf-C2H2	YVCKECGKAFTQSTG	0	9	473
TJP2	ZO2	Q9UDY2	9q21.11	K460-m1	133.96		GATPTPFKSTGDIAG	0	9	479
TJP1	ZO1 iso2	Q07157-2	15q13.1	K916-m1	186.97		RIDSPGFKPASQQVY	0	9	478
TJP1	ZO1	Q07157	15q13.1	K1530-m1	195.46		AYNRFTPKPYTSSAR	0	9	477
ZNHIT6	ZNHIT6	Q9NWK9	1p22.3	K329-m1	53.92		LLPNGFTKRKENSTF	0	9	476
ZNF92	ZNF92	Q03936	7q11.21	K454-m2	68.49	zf-C2H2	HMEDKPYKCEECGKA	0	9	475
CNBP	ZNF9	P62633	3q21.3	K8-m1	19.46	zf-CCHC	MSSNECFKCGRSGHW	0	9	474
ZNF749	ZNF749	O43361	19q13.43	K619-m1	90.36		YKCSKCGKFFRYRCT	0	9	454
ZNF713	ZNF713	Q8N859	7p11.2	K411-m2	50.17		RKIHTREKLCEYKCE	0	9	453
ZNF707	ZNF707	Q96C28	8q24.3	K89-m1	43.09		GPRPGARKSADPKRP	0	9	452
ZNF512	ZNF512	Q96ME7	2p23.3	K18-m1	64.68		TSGPTTFKQQRSTRI	0	9	427
ZNF518B	ZNF518B	Q9C0D4	4p16.1	K482-m1	119.53		AFPSVALKGHSLASV	0	9	433
ZNF518B	ZNF518B	Q9C0D4	4p16.1	K282-m1	119.53		IMLLPEPKEYQKDVV	0	9	432
ZNF518B	ZNF518B	Q9C0D4	4p16.1	K223-m1	119.53		AGAKRPVKAVAKLEP	0	9	431
ZNF518A	ZNF518	Q6AHZ1	10q24.1	K416-m1	166.78		NASSGFMKTAVLGPT	0	9	430
ZNF513	ZNF513	Q8N8E2	2p23.3	K404-m1	57.88	zf-C2H2	SAHLDNLKRHQRVHT	0	9	429
ZNF512B	ZNF512B	Q96KM6	20q13.33	K459-m1	97.26		KARVHRSKKQEGPGP	0	9	428
ZBTB49	ZNF509	Q6ZSB9	4p16.3	K316-m1	85.06		LKKLNFLKSQKYAEQ	0	9	426
ZNF703	ZNF703	Q9H7S9	8p11.23	K550-m1	58.22		SRYHPYGKSHLSTAG	0	9	451
ZNF507	ZNF507	Q8TCN5	19q13.11	K446-m1	105.77		DDVYRADKCTVDIGG	0	9	425
ZNF491	ZNF491	Q8N8L2	19p13.2	K73-m3	50.95		KCQKFLEKPYKHKQR	0	9	424
ZNF484	ZNF484	Q5JVG2	9q22.31	K315-m1	98.22		YEKDFSLKSNRQKTP	0	9	423
ZNF483	ZNF483	Q8TF39	9q31.3	K352-m1	85.1		LVLNRKEKTAGEKSR	0	9	422
ZNF483	ZNF483	Q8TF39	9q31.3	K350-m1	85.1		SDLVLNRKEKTAGEK	0	9	421
ZNF483	ZNF483	Q8TF39	9q31.3	K337-m1	85.1		RRYNESKKPFSFHSD	0	9	420
ZNF532	ZNF532	Q9HCE3	18q21.32	K260-m1	141.7		LPSVAPSKTKSSSKL	0	9	434
ZNF532	ZNF532	Q9HCE3	18q21.32	K262-m1	141.7		SVAPSKTKSSSKLSS	0	9	435
ZNF551	ZNF551	Q7Z340	19q13.43	K161-m1	77.51		YNEEEPWKRKVDEAT	0	9	436
ZNF551	ZNF551	Q7Z340	19q13.43	K347-m1	77.51	zf-C2H2	CRKTFSYKSNLIEHQ	0	9	437
ZNF48	ZNF553	Q96MX3	16p11.2	K147-m3	67.82	zf-C2H2	YKCGVCGKGFGDSSA	0	9	438
ZNF48	ZNF553	Q96MX3	16p11.2	K157-m3	67.82	zf-C2H2	GDSSARIKHQRTHSG	0	9	439
ZNF560	ZNF560	Q96MR9	19p13.2	K263-m1	91.12		NKTSTIRKVSVFSKH	0	9	440
ZNF594	ZNF594	Q96JF6	17p13.2	K221-m1	93.91	zf-C2H2	KECGKAFKGSSNLVL	0	9	441
ZNF598	ZNF598	Q86UK7	16p13.3	K263-m1	98.64		FRTEIDLKAHRTACH	0	9	442
ZNF598	ZNF598	Q86UK7	16p13.3	K779-m1	98.64		EARFSEFKSHSGEFR	0	9	443
ZNF616	ZNF616	Q08AN1	19q13.41	K435-m2	90.27		QRIHTGQKTYKCNKC	0	9	444
ZNF616	ZNF616	Q08AN1	19q13.41	K438-m2	90.27	zf-C2H2	HTGQKTYKCNKCGKV	0	9	445
ZNF618	ZNF618	Q5T7W0	9q32	K950-m1	104.96		MNKLMFLKSNMLAAA	0	9	446
ZNF644	ZNF644	Q9H582	1p22.2	K582-m1	149.57		SVVGSSKKSATYICK	0	9	447
ZNF644	ZNF644	Q9H582	1p22.2	K689-m1	149.57		HRIQKARKSIAQSGV	0	9	448
ZNF644	ZNF644	Q9H582	1p22.2	K1023-m2	149.57		TGTGTPVKRVRKAIE	0	9	449
ZNF670	ZNF670	Q9BS34	1q44	K204-m1	44.6	zf-C2H2	YKCKHCDKAFNYSSY	0	9	450
ZC3H11A	ZC3H11A	O75152	1q32.1	K300-m1	89.13		GDSDPPLKRSLAQRL	0	9	347
ZBTB8A	ZBTB8	Q96BR9	1p35.1	K298-m3	50.14	zf-C2H2	VKRKADLKRHLRCHT	0	9	345
UTP11	UTP11L	Q9Y3A2	1p34.3	K114-m1	30.45	Utp11	MKRVAEAKKIERLKS	0	9	201
WASHC4	WASHC4	Q2M389	12q23.3	K29-m1	136.4		IHAEVQLKNYGKFLE	0	9	246
WDHD1	WDHD1	O75717	14q22.2-q22.3	K915-m1	125.97		QGRVNPFKVSASSKE	0	9	252
BUD23	WBSCR22	O43709	7q11.23	K198-m1	31.88		YPNSAKAKKFYLCLF	0	9	251
WBP4	WBP4	O75554	13q14.11	K6-m1	42.51		AAMADYWKSQPKKFC	0	9	250
WBP11	WBP11	Q9Y2W2	12p12.3	K169-m1	70		QPPSILKKTSAYGPP	0	9	249
WASHC5	WASHC5	Q12768	8q24.13	K768-m2	134.29	Strumpellin	YVNIYGLKIWQEEVS	0	9	248
WASHC4	WASHC4	Q2M389	12q23.3	K33-m1	136.4	WASH-7_N	VQLKNYGKFLEEYTS	0	9	247
WAPL	WAPL	Q7Z5K2	10q23.2	K541-m1	132.95		KSKENTRKIFSGPKR	0	9	245
DCAF5	WDR22	Q96JK2	14q24.1	K364-m2	103.96		IKIWSPYKQPGCTGD	0	9	254
WAC	WAC	Q9BTA9	10p12.1|10p12.1-p11.2	K79-m1	70.72		STGHSKAKNVHTHRV	0	9	244
WAC	WAC	Q9BTA9	10p12.1|10p12.1-p11.2	K29-m1	70.72		SQPYQALKYSSKSHP	0	9	243
VWA5B1	VWA5B1	Q5TIE3	1p36.12	K314-m3	133.8		TDFIKGMKKKSRAER	0	9	242
VRK2	VRK2	Q86Y07	2p16.1	K443-m1	58.14		FTSPDIFKKSRSPSW	0	9	240
VRK1	VRK1	Q99986	14q32.2	K5-m1	45.48		AAAMPRVKAAQAGRQ	0	9	239
VPS4A	VPS4A	Q9UN37	16q22.1	K23-m1	48.9	MIT	ATEEDKAKNYEEALR	0	9	238
WDR12	WDR12	Q9GZL7	2q33.2	K211-m1	47.71	WD40	FCSGSWDKMLKIWST	0	9	253
WDR24	WDR24	Q96S15	16p13.3	K380-m1	88.21		RRHPIFFKRKLDPAE	0	9	255
VPS45	VPS45A	Q9NRW7	1q21.2	K322-m1	65.08	Sec1	VENYPQFKKMSGTVS	0	9	236
POC1B	WDR51B	Q8TC44	12q21.33	K99-m1	53.67	WD40	RGKFSEFKAHTAPVR	0	9	264
WDR74	WDR74	Q6RFH5	11q12.3	K311-m1	42.44		LEHKVYLKSQLNCLL	0	9	270
WDR70	WDR70	Q9NW82	5p13.2	K32-m1	73.2		MGFTGFGKKARTFDL	0	9	269
WDR60	WDR60	Q8WVS4	7q36.3	K487-m1	122.57		RTQALKQKMRSTKLL	0	9	268
SNRNP40	WDR57	Q96DI7	1p35.2	K148-m1	39.31	WD40	GERVKRLKGHTSFVN	0	9	267
SNRNP40	WDR57	Q96DI7	1p35.2	K18-m1	39.31		ELPLVPVKRQRHELL	0	9	266
SNRNP40	WDR57	Q96DI7	1p35.2	K6-m1	39.31		AAMIEQQKRKGPELP	0	9	265
WDR5	WDR5	P61964	9q34.2	K38-m1	36.59	WD40	VKPNYALKFTLAGHT	0	9	263
WDR25	WDR25	Q64LD2	14q32.2	K159-m1	60.16		SESETVGKNGSSFQK	0	9	256
WDR43	WDR43	Q15061	2p23.2	K181-m1	74.89	WD40	LCISPDGKMLLSAGR	0	9	262
WDR36	WDR36	Q8NI36	5q22.1	K477-m1	105.32		CSTWNYQKSTIGAYF	0	9	261
WDR36	WDR36	Q8NI36	5q22.1	K431-m1	105.32		NKKRVKRKGLQNTMS	0	9	260
WDR36	WDR36	Q8NI36	5q22.1	K416-m1	105.32		TVHEKFNKSLGHGLI	0	9	259
WDR34	WDR34	Q96EX3	9q34.11	K361-m1	57.8		TEGGFPLKCSLAAGE	0	9	258
WDR25	WDR25	Q64LD2	14q32.2	K167-m1	60.16		NGSSFQKKKCEDCVV	0	9	257
VPS45	VPS45A	Q9NRW7	1q21.2	K323-m1	65.08	Sec1	ENYPQFKKMSGTVSK	0	9	237
VPS13C	VPS13C	Q709C8	15q22.2	K3553-m1	422.39	ATG_C	EGAAGFFKGIGKGLV	0	9	235
ZBTB7B	ZBTB7B	O15156	1q21.3	K206-m1	58.03		RRSRKPRKAFLQTKG	0	9	344
UVRAG	UVRAG	Q9P2Y5	11q13.5	K215-m3	78.15	Atg14	QTQVTVQKIGKEIEE	0	9	209
VAV3	VAV3	Q9UKW4	1p13.3	K737-m2	97.78	SH2	IAENRKFKSLMELVE	0	9	215
VAV3	VAV3	Q9UKW4	1p13.3	K735-m2	97.78	SH2	FHIAENRKFKSLMEL	0	9	214
VASP	VASP	P50552	19q13.32	K321-m1	39.83		STTLPRMKSSSSVTT	0	9	213
VASH1	VASH1	Q7L8A9	14q24.3	K146-m1	40.96	Vasohibin	TQFFEIKKSRPLTGL	0	9	212
VAPB	VAPB	O95292	20q13.32	K43-m1	27.23	Motile_Sperm	TDRNVCFKVKTTAPR	0	9	211
VAPA	VAPA	Q9P0L0	18p11.22	K50-m1	27.89	Motile_Sperm	SDRKVCFKVKTTAPR	0	9	210
UTRN	utrophin	P46939	6q24.2	K3087-m1	394.47	ZZ	GFRYRSLKHFNYDVC	0	9	208
VCP	VCP	P55072	9p13.3	K231-m1	89.32		LRHPALFKAIGVKPP	0	9	217
UTP14C	UTP14C	Q5TAP6	13q14.3	K651-m1	87.19	Utp14	KRRQFLIKAPEGPPR	0	9	207
UTP14A	UTP14A	Q9BVJ6	Xq26.1	K652-m1	87.98	Utp14	KRRRFLIKAPEGPPR	0	9	206
UTP14A	UTP14A	Q9BVJ6	Xq26.1	K309-m1	87.98	Utp14	SGKWAKSKAIMAKYD	0	9	205
UTP14A	UTP14A	Q9BVJ6	Xq26.1	K307-m1	87.98	Utp14	QNSGKWAKSKAIMAK	0	9	204
UTP14A	UTP14A	Q9BVJ6	Xq26.1	K298-m1	87.98	Utp14	MMERMSLKHQNSGKW	0	9	203
UTP14A	UTP14A	Q9BVJ6	Xq26.1	K136-m1	87.98	Utp14	HREVAFNKTAQVLSK	0	9	202
VCPIP1	VCIP135	Q96JH7	8q13.1	K1108-m1	134.32		LVEAQRKKLQEMVSS	0	9	216
VCP	VCP	P55072	9p13.3	K315-m2	89.32	AAA	AIAPKREKTHGEVER	0	9	218
VPS13C	VPS13C	Q709C8	15q22.2	K3545-m1	422.39	ATG_C	KPVEGAKKEGAAGFF	0	9	234
HDLBP	vigilin	Q00341	2q37.3	K632-m1	141.46	KH_1	ETIIITGKRANCEAA	0	9	227
VPS13B	VPS13B	Q7Z7G8	8q22.2	K2052-m1	448.66		LDISKPLKANLSFTK	0	9	233
VPS13A	VPS13A	Q96RL7	9q21.2	K2996-m1	360.28	ATG_C	GGAAGFFKGVGKGLV	0	9	232
VPS13A	VPS13A	Q96RL7	9q21.2	K2988-m1	360.28	ATG_C	KPIKGAQKGGAAGFF	0	9	231
VIM	Vimentin	P08670	10p13	K445-m1	53.65		SKRTLLIKTVETRDG	0	9	230
VIM	Vimentin	P08670	10p13	K120-m1	53.65	Filament	RFANYIDKVRFLEQQ	0	9	229
HDLBP	vigilin	Q00341	2q37.3	K892-m1	141.46	KH_1	HRSVMGPKGSRIQQI	0	9	228
VEZT	VEZATIN	Q9HBM0	12q22	K593-m1	88.66		LKSVLGFKASEAERQ	0	9	226
VCX	VCX	Q9H320	Xp22.31	K13-m1	22.29	VCX_VCY	RASGPPAKATEAGKR	0	9	219
FLT1	VEGFR1	P17948	13q12.3	K1153-m2	150.77	Pkinase_Tyr	RFAELVEKLGDLLQA	0	9	225
FLT1	VEGFR1	P17948	13q12.3	K932-m1	150.77	Pkinase_Tyr	RDLFFLNKDAALHME	0	9	224
FLT1	VEGFR1	P17948	13q12.3	K831-me	150.77	Pkinase_Tyr	RERLKLGKSLGRGAF	0	9	223
FLT1	VEGFR1	P17948	13q12.3	K306-m3	150.77	ig	DKMQNKDKGLYTCRV	0	9	222
VDAC2	VDAC2	P45880	10q22.2	K277-m1	31.57	Porin_3	LSALVDGKSINAGGH	0	9	221
VDAC1	VDAC1	P21796	5q31.1	K174-m1	30.77	Porin_3; TM	SNFAVGYKTDEFQLH	0	9	220
WDR82	WDR82	Q6UXN9	3p21.2	K2-m1	35.08		AAAAAAMKLTDSVLR	0	9	271
WDR89	WDR89	Q96FK6	14q23.2	K364-m1	43.21		FTKKESMKIASSVHQ	0	9	274
BRWD1	WDR9	Q9NSI6	21q22.2	K1037-m1	262.94		ATGKLMDKSFSIRYH	0	9	275
YAP1	YAP1	P46937	11q22.1	K497-me	54.46		LAATKLDKESFLTWL	0	9	319
YY1	YY1	P25490	14q32.2	K301-m1	44.71		RTIACPHKGCTKMFR	0	9	325
YY1	YY1	P25490	14q32.2	K183-m1	44.71		GGKKSGKKSYLSGGA	0	9	324
YTHDC2	YTHDC2	Q9H6S0	5q22.2	K1231-m1	160.25		PALHPPQKYKDRGIL	0	9	323
YTHDC2	YTHDC2	Q9H6S0	5q22.2	K1220-m1	160.25		TAERVLMKSPSPALH	0	9	322
YTHDC2	YTHDC2	Q9H6S0	5q22.2	K34-m1	160.25		PGGGGRAKGLKDIRI	0	9	321
YKT6	YKT6	O15498	7p13	K103-m1	22.42	Longin	KVLDEFSKQVDRIDW	0	9	320
YAP1	YAP1	P46937	11q22.1	K494-me	54.46		ESVLAATKLDKESFL	0	9	318
YY1	YY1	P25490	14q32.2	K315-m1	44.71		RDNSAMRKHLHTHGP	0	9	327
YAF2	YAF2	Q8IY57	12q12	K99-m3	19.9		TSKKNSHKKTRPRLK	0	9	317
YAF2	YAF2	Q8IY57	12q12	K94-m3	19.9		SEKETTSKKNSHKKT	0	9	316
XRN2	XRN2	Q9H0D6	20p11.22	K858-m1	108.58		RGQAQIPKLMSNMRP	0	9	315
XRN2	XRN2	Q9H0D6	20p11.22	K524-m1	108.58		KQRYYKNKFDVDAAD	0	9	314
XPNPEP1	XPNPEP1 iso3	Q9NQW7-3	10q25.1	K6-m1	74.8		AAMAASRKPPRVRVN	0	9	313
ERCC5	XPG	P28715	13q33.1	K1071-m1	133.11		LEESSSLKRKRLSDS	0	9	312
YY1	YY1	P25490	14q32.2	K305-m1	44.71		CPHKGCTKMFRDNSA	0	9	326
YY1	YY1	P25490	14q32.2	K362-m1	44.71	zf-C2H2	CTFEGCGKRFSLDFN	0	9	328
CFAP43	WDR96	Q8NDM7	10q25.1	K1482-m1	191.98		VIRTQGQKKVASMME	0	9	276
YLPM1	ZAP3	P49750	14q24.3	K858-m1	219.99		SRGPGLVKQEDFRDK	0	9	337
ZBTB42	ZBTB42	B2RXF5	14q32.33	K247-m1	46.49		RSPHSPPKPPPVPAA	0	9	343
ZBTB38	ZBTB38	Q8NAP3	3q23	K1082-m1	134.26	zf-C2H2	FTLNETLKIHERIHT	0	9	342
ZBTB2	ZBTB2	Q8N680	6q25.1	K391-m1	57.34		IHTGKPFKCSTCDKS	0	9	341
ZBED6	ZBED6	P86452	1q32.1	K479-m1	109.97		LENVQSQKIHLTVDI	0	9	340
ZBED6	ZBED6	P86452	1q32.1	K467-m1	109.97		LYDCVREKIFLTLEN	0	9	339
YLPM1	ZAP3	P49750	14q24.3	K1263-m1	219.99		RQHEIILKAAQELKM	0	9	338
YLPM1	ZAP3	P49750	14q24.3	K643-m1	219.99		RQSGPQWKGPKPAFG	0	9	336
ZADH2	ZADH2	Q8N4Q0	18q22.3	K174-m1	40.14		LGGLSEGKKVLVTAA	0	9	329
YLPM1	ZAP3	P49750	14q24.3	K613-m1	219.99		PAEGTKSKWGMIPRG	0	9	335
YLPM1	ZAP3	P49750	14q24.3	K586-m1	219.99		RCEGPRPKGPRFEGN	0	9	334
YLPM1	ZAP3	P49750	14q24.3	K540-m1	219.99		SQPITAVKDMPVRSG	0	9	333
ZC3HAV1	ZAP	Q7Z2W4	7q34	K374-m1	101.43		NDQGARRKTVFSPTL	0	9	332
ZC3HAV1	ZAP	Q7Z2W4	7q34	K360-m1	101.43		STSAPNWKSLTSWTN	0	9	331
MAP3K20	ZAK	Q9NYL2	2q31.1	K713-m1	91.16		SRGRYPGKFYRVSQS	0	9	330
LYVE1	XLKD1	Q9Y5Y7	11p15.4	K298-m1	35.21		SNPNEESKKTDKNPE	0	9	311
XDH	XDH	P47989	2p23.1	K443-m1	146.42	CO_deh_flav_C	SGMRVLFKPGTTEVQ	0	9	310
BAZ1B	WSTF	Q9UIG0	7q11.23	K344-m1	170.9		WCHVHLKKSLSGSPL	0	9	309
NSD3	WHSC1L1	Q9BZ95	8p11.23	K667-m1	161.61		DLQVGFGKQVDSPSA	0	9	284
WIPF2	WIRE	Q8TF74	17q21.2	K358-m1	46.29		SEPPSRGKPPPPPSR	0	9	290
WIPF2	WIRE	Q8TF74	17q21.2	K171-m1	46.29		TTSSTGMKHSSSAPP	0	9	289
WIPF2	WIRE	Q8TF74	17q21.2	K110-m1	46.29		GSENLAGKPALQIPS	0	9	288
NELFA	WHSC2	Q9H3P2	4p16.3	K446-m1	57.28		FAAQEMFKTANKVTR	0	9	287
NELFA	WHSC2	Q9H3P2	4p16.3	K200-m1	57.28		AGVPFHAKGRGLLRK	0	9	286
NELFA	WHSC2	Q9H3P2	4p16.3	K190-m1	57.28		TETAQQLKRSAGVPF	0	9	285
NSD3	WHSC1L1	Q9BZ95	8p11.23	K477-m1	161.61		WKTAAARKSLPASIT	0	9	283
BAZ1B	WSTF	Q9UIG0	7q11.23	K181-m2	170.9		QKKETVVKEDEGRRE	0	9	308
NSD2	WHSC1	O96028	4p16.3	K1207-m1	152.26		GFLGDRPKTSTTLSS	0	9	282
NSD2	WHSC1	O96028	4p16.3	K615-m1	152.26		SSALGFSKSSSPSAS	0	9	281
NSD2	WHSC1	O96028	4p16.3	K588-m1	152.26		LKSQAATKNLSDACK	0	9	280
NSD2	WHSC1	O96028	4p16.3	K582-m1	152.26		MEAASSLKSQAATKN	0	9	279
NSD2	WHSC1	O96028	4p16.3	K443-m3	152.26		GSPPGRKKTTVSMPR	0	9	278
DCAF13	WDSOF1	Q9NV06	8q22.3	K353-m1	51.4	WD40	EMNIRLWKANASEKL	0	9	277
WIZ	WIZ	O95785	19p13.12	K967-m2	178.67		PAVNKAIKSPPGFSA	0	9	291
WIZ	WIZ	O95785	19p13.12	K975-m1	178.67		SPPGFSAKGLGHPPS	0	9	292
WIZ	WIZ	O95785	19p13.12	K1108-m1	178.67		NPPGPSPKALAKMMG	0	9	293
WIZ	WIZ	O95785	19p13.12	K1112-m1	178.67		PSPKALAKMMGGAGP	0	9	294
WIZ	WIZ	O95785	19p13.12	K1139-m1	178.67		HISPLAKKLPPPPGS	0	9	295
WIZ	WIZ	O95785	19p13.12	K1162-m1	178.67		SPPPTARKMFPGLAA	0	9	296
WIZ	WIZ	O95785	19p13.12	K1322-m1	178.67		PLAGRPGKPGAGPAQ	0	9	297
WIZ	WIZ	O95785	19p13.12	K1356-m1	178.67		YLGSVAAKRPLQEDR	0	9	298
WIZ	WIZ	O95785	19p13.12	K1382-m1	178.67		IQTELPFKAKTLHEK	0	9	299
WIZ	WIZ	O95785	19p13.12	K1384-m1	178.67		TELPFKAKTLHEKTS	0	9	300
WIZ	WIZ	O95785	19p13.12	K1464-m1	178.67		QGGRPFTKKFRSAGH	0	9	301
WIZ	WIZ iso3	M0QXA7	19p13.12	K14-m1	103.28		GSPSLPKKSLPVPGA	0	9	302
WIZ	WIZ iso3	M0QXA7	19p13.12	K316-m1	103.28		PAKKAKLKAAGMASP	0	9	303
WNK4	WNK4	Q96J92	17q21.2	K226-m1	134.74	Pkinase	SEEVEMLKGLQHPNI	0	9	304
WNT2	WNT2	P09544	7q31.2	K229-m2	40.42	wnt	LAMADFRKTGDYLWR	0	9	305
WNT9B	WNT9B	O14905	17q21.32	K184-m1	39	wnt	LGSKRGNKDLRARAD	0	9	306
BAZ1B	WSTF	Q9UIG0	7q11.23	K175-m2	170.9		QIAQDHQKKETVVKE	0	9	307
TBL1Y	TBL1Y	Q9BQ87	Yp11.2	K474-m1	56.69	WD40	LASGSFDKYVHIWNT	0	8	508
TBC1D5	TBC1D5	Q92609	3p24.3	K519-m1	89		QQQQRLMKSESMPVQ	0	8	506
RPL14	RPL14	P50914	3p22.1	K209-m1	23.43		AQKAPAPKASGKKAA	0	7	473
09-Sep	09-Sep	Q9UHD8	17q25.3	K2-m1	65.4		AAAAAAMKKSYSGGT	0	8	106
SERPINB12	SERPINB12	Q96P63	18q21.33	K194-m1	46.28	Serpin	LVNAVYFKAKWETYF	0	8	112
09-Sep	SEPT9 iso7	Q9UHD8-7	17q25.3	K9-m1	63.5		KKSYSALKRSFEVEE	0	8	111
09-Sep	09-Sep	Q9UHD8	17q25.3	K322-m1	65.4	Septin	INTLFKSKISRKSVQ	0	8	110
09-Sep	09-Sep	Q9UHD8	17q25.3	K320-m1	65.4	Septin	TLINTLFKSKISRKS	0	8	109
09-Sep	09-Sep	Q9UHD8	17q25.3	K28-m1	65.4		DSSGPALKRSFEVEE	0	8	108
09-Sep	09-Sep	Q9UHD8	17q25.3	K3-m1	65.4		AAAAAMKKSYSGGTR	0	8	107
05-Sep	05-Sep	Q99719	22q11.21	K363-m1	42.78		QEMLQRMKQQMQDQA	0	8	105
SERPINB8	SERPINB8	P50452	18q22.1	K178-m1	42.77	Serpin	WNEQFDRKYTRGMLF	0	8	114
03-Sep	03-Sep	Q9UH03	22q13.2	K30-m1	40.7		PKPAVPMKPMSINSN	0	8	104
10-Sep	10-Sep	Q9P0V9	2q13	K449-m1	52.59		LRKDKDRKNSNFLAA	0	8	103
SENP7	SENP7	Q9BQF6	3q12.3	K20-m1	119.66		SEIITEGKRKKSSSD	0	8	102
SENP6	SENP6	Q9GZR1	6q14.1	K102-m1	126.15		SESFKTLKGNPIGLN	0	8	101
SENP6	SENP6	Q9GZR1	6q14.1	K99-m1	126.15		RNKSESFKTLKGNPI	0	8	100
SENP3	SENP3	Q9H4L4	17p13.1	K43-m1	65.01		PPPKPRLKSGGGFGP	0	8	99
SERPINB7	SERPINB7	O75635	18q21.33	K196-m1	42.9	Serpin	ETINCHFKSPKCSGK	0	8	113
SERPINE2	SERPINE2	P07093	2q36.1	K190-m1	44	Serpin	LVNAVYFKGLWKSRF	0	8	115
SENP1	SENP1	Q9P0U3	12q13.11	K124-m1	73.48		SLYLETRKTSSGLSN	0	8	96
SETD2	SETD2	Q9BYW2	3p21.31	K556-m1	287.6		DSSASRYKSTLSKPI	0	8	125
SETDB1	SETDB1	Q15047	1q21.3	K1178-m2	143.16	SET	STHGIAIKSTNMASV	0	8	133
SETDB1	SETDB1	Q15047	1q21.3	K1170-m3	143.16	SET	STRGFALKSTHGIAI	0	8	132
SETDB1	SETDB1	Q15047	1q21.3	K1162-m1	143.16	SET	MKRQVAVKSTRGFAL	0	8	131
SETDB1	SETDB1	Q15047	1q21.3	K490-m3	143.16		SRKQVAKKSTSFRPG	0	8	130
SETD2	SETD2	Q9BYW2	3p21.31	K1489-m1	287.6		LTERKKNKSHRDIKR	0	8	129
SETD2	SETD2	Q9BYW2	3p21.31	K1468-m2	287.6		KECAKQGKMPCYFDL	0	8	128
SETD2	SETD2	Q9BYW2	3p21.31	K47-m1	287.6		FIKGPMFKGVASSRF	0	8	124
SERPINH1	SERPINH1	P50454	11q13.5	K263-m1	46.44	Serpin	VEMPLAHKLSSLIIL	0	8	116
SETD1B	SETD1B	Q9UPS6	12q24.31	K394-m1	212.8		ATPAPGFKSAFSPYQ	0	8	123
SETD1B	SETD1B	Q9UPS6	12q24.31	K309-m1	212.8		QDPAVTFKARRHESK	0	8	122
SETBP1	SETBP1	Q9Y6X0	18q12.3	K1024-m2	175.01		KKRGRPAKTNDTMTK	0	8	120
SETBP1	SETBP1	Q9Y6X0	18q12.3	K725-m1	175.01		RGTIYIGKKRGRKPR	0	8	119
SET	SET	Q01105	9q34.11	K132-m1	33.49	NAP	VTEFEDIKSGYRIDF	0	8	118
SET	SET	Q01105	9q34.11	K83-m1	33.49		LRQPFFQKRSELIAK	0	8	117
SENP3	SENP3	Q9H4L4	17p13.1	K2-m1	65.01		AAAAAAMKETIQGTG	0	8	98
SETX	senataxin	Q7Z333	9q34.13	K2501-m1	302.88		KLDSGFAKTSVAASL	0	8	95
SETDB2	SETDB2	Q96T68	13q14.2	K504-m1	81.89	SET	AIFQHNGKKMEFVSS	0	8	135
SCYL2	SCYL2	Q6P3W7	12q23.1	K688-m3	103.71		EEKQKLAKEQEQAQK	0	8	69
SDE2	SDE2	Q6IQ49	1q42.12	K173-m1	49.74		RLEDSVLKGMQAASS	0	8	75
SDCCAG8	SDCCAG8	Q86SQ7	1q43-q44	K399-m2	82.68	CCCAP	MMKKEITKEREYMGS	0	8	74
SDCCAG8	SDCCAG8	Q86SQ7	1q43-q44	K395-m2	82.68	CCCAP	IEKDMMKKEITKERE	0	8	73
CWC27	SDCCAG10	Q6UX04	5q12.3	K372-m1	53.85		QKYEALRKQQSKKGT	0	8	72
SDAD1	SDA1	Q9NVU7	4q21.1	K541-m2	79.87	SDA1	PMEERKAKAAAISTS	0	8	71
SDAD1	SDA1	Q9NVU7	4q21.1	K539-m2	79.87	SDA1	SMPMEERKAKAAAIS	0	8	70
SCRIB	Scribble	Q14160	8q24.3	K1507-m1	174.88		LWRAARMKSLEQDAL	0	8	68
SDS	SDS	P20132	12q24.13	K41-m1	34.63	PALP	AQPSGSFKIRGIGHF	0	8	77
SCRIB	Scribble	Q14160	8q24.3	K383-m1	174.88		ALTHLNLKALWLAEN	0	8	67
SCN8A	SCN8A	Q9UQD0	12q13.13	K509-m2	225.28	Na_trans_cytopl	ELSEGEEKGDPEKVF	0	8	66
SCN2A	SCN2A	Q99250	2q24.3	K1998-m3	227.97		SEKEDKGKDIRESKK	0	8	64
SCN2A	SCN2A	Q99250	2q24.3	K1990-m3	227.97		KEKFEKDKSEKEDKG	0	8	63
SCML2	SCML2	Q9UQR0	Xp22.13	K123-m1	77.26	MBT	QPVGTCEKEGDLLQP	0	8	62
SCMH1	SCMH1	Q96GD3	1p34.2	K142-m1	73.35		SWPMFLLKTLNGAEM	0	8	61
SDHA	SDHA	P31040	5p15.33	K547-m1	72.69	Succ_DH_flav_C	SKLYGDLKHLKTFDR	0	8	76
SDSL	SDSL	Q96GA7	12q24.13	K48-m1	34.67	PALP	VQPSGSFKIRGIGHF	0	8	78
SETX	senataxin	Q7Z333	9q34.13	K2027-m3	302.88	AAA_11	IILEFKEKCKDKKNP	0	8	94
SELENOS	SELS	Q9BQE4	15q26.3	K133-m1	21.16	Selenoprotein_S	KSYKGNAKKPQEEDS	0	8	87
SETX	senataxin	Q7Z333	9q34.13	K1627-m1	302.88		LSPSLKNKSKGIQSI	0	8	93
SETX	senataxin	Q7Z333	9q34.13	K1625-m1	302.88		SALSPSLKNKSKGIQ	0	8	92
SEMG2	SEMG2	Q02383	20q13.12	K363-m1	65.44	Semenogelin	RHLNCGEKGIQKGVS	0	8	91
SEMA3D	SEMA3D	O95025	7q21.11	K759-m1	89.65		HMQEMKKKRNRRHHR	0	8	90
SEMA3D	SEMA3D	O95025	7q21.11	K758-m1	89.65		KHMQEMKKKRNRRHH	0	8	89
SELENOS	SELS	Q9BQE4	15q26.3	K150-m1	21.16	Selenoprotein_S	PSTSSVLKRKSDRKP	0	8	88
SEH1L	SEH1L	Q96EE3	18p11.21	K306-m1	39.65	WD40	DGCVRLWKANYMDNW	0	8	86
EXOC6B	SEC15L2	Q9Y2D4	2p13.2	K189-m1	94.2		VMVDNIPKLREEIKD	0	8	79
EXOC3	SEC6L1	O60645	5p15.33	K48-m1	85.57		ASVEARLKAAIQSQL	0	8	85
SEC63	SEC63	Q9UGP8	6q21	K403-m3	88	Sec63	RRVSNHKKYKIKTIQ	0	8	84
SEC63	SEC63	Q9UGP8	6q21	K402-m3	88	Sec63	LRRVSNHKKYKIKTI	0	8	83
SEC31B	SEC31B	Q9NQW1	10q24.31	K355-m1	128.7		KISSSFSKGQPLPPL	0	8	82
SEC31A	SEC31A	O94979	4q21.22	K471-m1	133.01		ASQTEFEKNVWSFLK	0	8	81
SEC23IP	SEC23IP	Q9Y6Y8	10q26.11-q26.12	K484-m1	111.08		KLLRTHFKKSLDDGK	0	8	80
SETDB2	SETDB2	Q96T68	13q14.2	K495-m1	81.89	SET	VIRDPESKTAIFQHN	0	8	134
SETMAR	SETMAR	Q53H47	3p26.1	K335-m2	78.03		PSVFPSCKRLTLETM	0	8	136
TBC1D30	TBC1D30	Q9Y2I9	12q14.3	K723-m1	102.74	DUF4682	PYEDLKTKLNSPWRT	0	8	505
SHROOM3	SHRM	Q8TF72	4q21.1	K657-m1	216.86		SLSGNFGKTKSAFSS	0	8	182
SIPA1L1	SIPA1L1	O43166	14q24.2	K5-m1	200.03		AAAMTSLKRSQTERP	0	8	189
GEMIN2	SIP1	O14893	14q21.1	K125-m1	31.59	SIP1	NKHRSHWKSQQLDSN	0	8	188
SIN3A	SIN3A	Q96ST3	15q24.2	K737-m1	145.18		DHQGINFKQNDTKVL	0	8	187
TCEAL1	SIIR	Q15170	Xq22.2	K101-m1	18.35	BEX	KLEEGSFKERLARSR	0	8	185
TCEAL1	SIIR	Q15170	Xq22.2	K92-m1	18.35	BEX	QPPCGVGKHKLEEGS	0	8	184
SHROOM3	SHRM	Q8TF72	4q21.1	K659-m1	216.86		SGNFGKTKSAFSSLQ	0	8	183
SHPRH	SHPRH	Q149N8	6q24.3	K951-m2	193.08	SNF2_N	DVVVKLRKISDWALK	0	8	181
SIPA1L3	SIPA1L3	O60292	19q13.13-q13.2	K1507-m1	194.61	SPAR_C	RSPRKNYKSTIEDDL	0	8	191
SHTN1	SHOT1	A0MZ66	10q25.3	K406-m1	71.64		TEEVTDLKRQAVEEM	0	8	180
SHTN1	SHOT1	A0MZ66	10q25.3	K169-m1	71.64		AIELENLKSKLVEVI	0	8	179
SHMT2	SHMT2	P34897	12q13.3	K469-m2	55.99		TAKLQDFKSFLLKDS	0	8	178
SHMT2	SHMT2	P34897	12q13.3	K269-m1	55.99	SHMT	KVIPSPFKHADIVTT	0	8	177
SPEN	SHARP	Q96T58	1p36.21-p36.13	K2076-m2	402.25		PEKNSKSKRGRSRNS	0	8	176
SPEN	SHARP	Q96T58	1p36.21-p36.13	K1843-m1	402.25		VEKPVTRKSERIDRE	0	8	175
SIPA1L3	SIPA1L3	O60292	19q13.13-q13.2	K1448-m1	194.61		VPKSFFSKQPVRNKH	0	8	190
SIRT1	SIRT1	Q96EB6	10q21.3	K622-me	81.68		SVAGTVRKCWPNRVA	0	8	192
SH3PXD2B	SH3PXD2B	A1X283	5q35.1	K821-m1	101.58		GQDDTRGKGSLGPWG	0	8	173
KIAA1217	SKT	Q5T5P2	10p12.2-p12.1	K1925-m1	214.12		TPSLTSYKAQNGSSS	0	8	201
SLC25A1	SLC25A1	P53007	22q11.21	K178-m1	34.01	Mito_carr	IVREQGLKGTYQGLT	0	8	207
SLC20A2	SLC20A2	Q08357	8p11.21	K426-m1	70.39	PHO4	DTVSYSKKRLRYDSY	0	8	206
SLC20A2	SLC20A2	Q08357	8p11.21	K425-m1	70.39	PHO4	GDTVSYSKKRLRYDS	0	8	205
SLAIN2	SLAIN2	Q9P270	4p11	K553-m1	62.54	SLAIN	GIPVPRSKLAQPVRR	0	8	204
SLAIN2	SLAIN2	Q9P270	4p11	K182-m1	62.54	SLAIN	DQTMSALKRQNLYNN	0	8	203
SLAIN1	SLAIN1	Q8ND83	13q22.3	K475-m1	60.59	SLAIN	VSIRQPLKATAYVSP	0	8	202
KIAA1217	SKT	Q5T5P2	10p12.2-p12.1	K1872-m1	214.12		QSLTHTGKGHHLSFS	0	8	200
POLDIP3	SKAR	Q9BY77	22q13.2	K88-m1	46.09		KDARFRIKGKVQDAR	0	8	193
KIAA1217	SKT	Q5T5P2	10p12.2-p12.1	K1082-m1	214.12		RKENITAKASSEDAG	0	8	199
KIAA1217	SKT	Q5T5P2	10p12.2-p12.1	K583-m1	214.12	AIP3	LVQSALFKGPITSYS	0	8	198
SKIL	SKIL	P12757	3q26.2	K487-m1	76.98		ISNNSTSKRKSESAT	0	8	197
POLDIP3	SKAR	Q9BY77	22q13.2	K418-m1	46.09		TTQPTEFKIKLAAAA	0	8	196
POLDIP3	SKAR	Q9BY77	22q13.2	K404-m1	46.09		TILKALFKSSGASVT	0	8	195
POLDIP3	SKAR	Q9BY77	22q13.2	K102-m1	46.09		REMLNSRKQQTTVPQ	0	8	194
SPEN	SHARP	Q96T58	1p36.21-p36.13	K965-m1	402.25		LKARKHLKPEQPADG	0	8	174
SH3PXD2B	SH3PXD2B	A1X283	5q35.1	K619-m1	101.58		LRPISKSKTDLPEEK	0	8	172
SETMAR	SETMAR	Q53H47	3p26.1	K498-m2	78.03		RIVTCDEKWILYDNR	0	8	137
SF3B2	SF3B2	Q13435	11q13.1	K843-m1	100.23		DPMAMTQKYEEHVRE	0	8	145
SCAF11	SFRS2IP	Q99590	12q12	K812-m1	164.65		KDTPQEKKRPQSPSP	0	8	151
SRSF2	SFRS2	Q01130	17q25.1	K172-m1	25.48		SARRSKSKSSSVSRS	0	8	150
SUGP2	SFRS14	Q8IX01	19p13.11	K1021-m1	120.21	G-patch	LGFQMLQKMGWKEGH	0	8	149
SUGP1	SF4	Q8IWZ8	19p13.11	K542-m1	72.47		EKFMETFKALKEGRE	0	8	148
SUGP1	SF4	Q8IWZ8	19p13.11	K335-m1	72.47		TAPDPGLKRKSPPEA	0	8	147
SUGP1	SF4	Q8IWZ8	19p13.11	K123-m1	72.47		TPTPSAGKRSLLISR	0	8	146
SF3B2	SF3B2	Q13435	11q13.1	K507-m1	100.23	DUF382	VPRHWCFKRKYLQGK	0	8	144
SCAF11	SFRS2IP	Q99590	12q12	K1124-m1	164.65		FVEQQSYKRKSEQEF	0	8	153
SF3B2	SF3B2	Q13435	11q13.1	K492-m1	100.23	DUF382	PKLLVHLKATRNSVP	0	8	143
SF3B2	SF3B2	Q13435	11q13.1	K268-m1	100.23		DDPSVGPKIPQALEK	0	8	142
SF3B1	SF3B1	O75533	2q33.1	K240-m1	145.83		DETPGRAKGSETPGA	0	8	141
SF3B1	SF3B1	O75533	2q33.1	K195-m1	145.83		AASQPPSKRKRRWDQ	0	8	140
SF3B1	SF3B1	O75533	2q33.1	K177-m1	145.83		QQLAEKAKAGELKVV	0	8	139
SF3A3	SF3A3	Q12874	1p34.3	K496-m1	58.85	DUF3449	KKTYEDLKRQGLLAA	0	8	138
SCAF11	SFRS2IP	Q99590	12q12	K1090-m1	164.65		YRSSFAYKDQNENRW	0	8	152
SRSF5	SFRS5	Q13243	14q24.1	K25-m1	31.26	RRM_1	KDVERFFKGYGRIRD	0	8	154
SH3KBP1	SH3KBP1	Q96B97	Xp22.12	K349-m1	73.13		PPSAPVIKQGAGTTE	0	8	171
SH3BP1	SH3BP1	Q9Y3L3	22q13.1	K147-m2	75.71	BAR	KHKKSLQKLVSDWNT	0	8	164
SH3D19	SH3D19	Q5HYK7	4q31.3	K180-m1	86.53		ASQAKAYKSLGEGPP	0	8	170
SH3D19	SH3D19	Q5HYK7	4q31.3	K147-m1	86.53		PRPLLLKKSVSSENP	0	8	169
SH3D19	SH3D19	Q5HYK7	4q31.3	K146-m1	86.53		APRPLLLKKSVSSEN	0	8	168
SH3BP5	SH3BP5	O60239	3p25.1	K240-m2	50.43	SH3BP5	QAKLTLAKGEYKMAL	0	8	167
SH3BP5	SH3BP5	O60239	3p25.1	K235-m3	50.43	SH3BP5	TVDDLQAKLTLAKGE	0	8	166
SH3BP4	SH3BP4	Q9P0V3	2q37.2	K270-m1	107.5		SSFFTGLKSPAPEQF	0	8	165
SH3BP1	SH3BP1	Q9Y3L3	22q13.1	K143-m2	75.71	BAR	PAILKHKKSLQKLVS	0	8	163
SGK3	SGK3	Q96BR1	8q13.1	K75-m2	57.11	PX	MALKIPAKRIFGDNF	0	8	155
SH3BP1	SH3BP1	Q9Y3L3	22q13.1	K142-m2	75.71	BAR	LPAILKHKKSLQKLV	0	8	162
SH3BP1	SH3BP1	Q9Y3L3	22q13.1	K3-m1	75.71	BAR	AAAAAMMKRQLHRMR	0	8	161
SH2D4A	SH2D4A	Q9H788	8p21.3	K240-m1	52.73		QASLRKSKAADEKRR	0	8	160
SH2D4A	SH2D4A	Q9H788	8p21.3	K128-m1	52.73		FTNSLKTKSQYHDLQ	0	8	159
CTR9	SH2BP1	Q6PD62	11p15.4	K844-m2	133.5		EERELRAKQEQEKEL	0	8	158
SGPL1	SGPL1	O95470	10q22.1	K247-m1	63.52	Pyridoxal_deC	SAHAAFNKAASYFGM	0	8	157
SCLY	SCLY	Q96I15	2q37.3	K89-m1	48.15	Aminotran_5	LAKMIGGKPQDIIFT	0	8	60
SCLT1	SCLT1	Q96NL6	4q28.2	K445-m3	80.91		GNESDYRKLEEMHQR	0	8	59
SCIN	SCIN	Q9Y6U3	7p21.3	K500-m1	80.49		IYKNGTSKKGGQAPA	0	8	58
RPLP0	RPLP0	P05388	12q24.23	K16-m1	34.27	Ribosomal_L10	WKSNYFLKIIQLLDD	0	7	523
RPS16	RPS16	P62249	19q13.2	K4-m1	16.45		AAAAMPSKGPLQSVQ	0	7	529
RPS12	RPS12	P25398	6q23.2	K129-m1	14.51		DVIEEYFKCKKAAAA	0	7	528
RPS11	RPS11	P62280	19q13.33	K45-m1	18.43	Ribosomal_S17_N	KNIGLGFKTPKEAIE	0	7	527
RPS10	RPS10	P46783	6p21.31	K139-m1	18.9		VPPGADKKAEAGAGS	0	7	526
RPLP2	RPLP2	P05387	11p15.5	K41-m1	11.66	Ribosomal_60s	ADDDRLNKVISELNG	0	7	525
RPLP1	RPLP1	P05386	15q23	K49-m1	11.51	Ribosomal_60s	FWPGLFAKALANVNI	0	7	524
RPLP0	RPLP0	P05388	12q24.23	K10-m1	34.27	Ribosomal_L10	REDRATWKSNYFLKI	0	7	522
RPS2	RPS2	P15880	16p13.3	K238-m1	31.32	Ribosomal_S5_C	ATLGNFAKATFDAIS	0	7	531
RPL8	RPL8	P62917	8q24.3	K192-m1	28.02	Ribosomal_L2_C	AYHKYKAKRNCWPRV	0	7	521
RPL7L1	RPL7L1	Q6DKI1	6p21.1	K36-m1	29.67	Ribosomal_L30_N	RKAYQALKATQAKQA	0	7	520
RPL7	RPL7	P18124	8q21.11	K202-m1	29.23		YTVGKRFKEANNFLW	0	7	519
RPL7	RPL7	P18124	8q21.11	K156-m1	29.23		SVNELIYKRGYGKIN	0	7	518
RPL7	RPL7	P18124	8q21.11	K148-m1	29.23		AWGYPNLKSVNELIY	0	7	517
RPL6	RPL6	Q02878	12q24.13	K239-m1	32.73	Ribosomal_L6e	IFDTEKEKYEITEQR	0	7	515
RPS17	RPS17	P08708	15q25.2	K129-m1	15.55		PTVGMNFKTPRGPVA	0	7	530
RPS2	RPS2	P15880	16p13.3	K257-m1	31.32		YLTPDLWKETVFTKS	0	7	532
RPL5	RPL5	P46777	1p22.1	K228-m1	34.36	Ribosomal_L18_c	KQFSQYIKNSVTPDM	0	7	511
RPS3A	RPS3A	P61247	4q31.3	K144-m1	29.94	Ribosomal_S3Ae	LFCVGFTKKRNNQIR	0	7	543
RPSA	RPSA	P08865	3p22.1	K40-m1	32.85	Ribosomal_S2	QMEQYIYKRKSDGIY	0	7	550
RPS9	RPS9	P46781	19q13.42	K11-m1	22.59	Ribosomal_S4	ARSWVCRKTYVTPRR	0	7	549
RPS7	RPS7	P62081	2p25.3	K178-m1	22.13	Ribosomal_S7e	ETFSGVYKKLTGKDV	0	7	548
RPS4Y1	RPS4Y1	P22090	Yp11.2	K155-m1	29.46	Ribosomal_S4e	RYPDPVIKVNDTVQI	0	7	547
RPS4Y1	RPS4Y1	P22090	Yp11.2	K53-m1	29.46		VFLRNRLKYALTGDE	0	7	546
RPS4X	RPS4X	P62701	Xq13.1	K53-m1	29.6	S4	IFLRNRLKYALTGDE	0	7	545
RPS29	RPS29	P62273	14q21.3	K13-m1	6.68	Ribosomal_S14	LYWSHPRKFGQGSRS	0	7	540
RPS20	RPS20	P60866	8q12.1	K8-m3	13.37		MAFKDTGKTPVEPEV	0	7	533
RPS27A	RPS27A	P62979	2p16.1	K63-m1	17.96	ubiquitin	LSDYNIQKESTLHLV	0	7	539
RPS27A	RPS27A	P62979	2p16.1	K6-m1	17.96	ubiquitin	AAMQIFVKTLTGKTI	0	7	538
RPS27	RPS27	P42677	1q21.3	K5-m1	9.46		AAAMPLAKDLLHPSP	0	7	537
RPS26	RPS26	P62854	12q13.2	K113-m1	13.02		AAPRPPPKPMAAAAA	0	7	536
RPS25	RPS25	P62851	11q23.3	K66-m1	13.74	Ribosomal_S25	CKEVPNYKLITPAVV	0	7	535
RPS21	RPS21	P63220	20q13.33	K51-m1	9.11	Ribosomal_S21e	GRFNGQFKTYAICGA	0	7	534
RPL6	RPL6	Q02878	12q24.13	K166-m1	32.73		GKRVVFLKQLASGLL	0	7	513
RPL5	RPL5	P46777	1p22.1	K164-m1	34.36	Ribosomal_L5e	NKVFGALKGAVDGGL	0	7	510
SCIN	SCIN	Q9Y6U3	7p21.3	K489-m1	80.49		LLSLFKDKPLIIYKN	0	8	57
RPL26	RPL26	P61254	17p13.1	K2-m1	17.26		AAAAAAMKFNPFVTS	0	7	482
RPL3	RPL3	P39023	22q13.1	K373-m1	46.11	Ribosomal_L3	KFIDTTSKFGHGRFQ	0	7	490
RPL3	RPL3	P39023	22q13.1	K250-m1	46.11	Ribosomal_L3	KTHRGLRKVACIGAW	0	7	489
RPL29	RPL29	P47914	3p21.2	K149-m1	17.75		SVPAQAPKRTQAPTK	0	7	488
RPL29	RPL29	P47914	3p21.2	K114-m1	17.75		RARARIAKGLRLCRP	0	7	487
RPL29	RPL29	P47914	3p21.2	K5-m1	17.75	Ribosomal_L29e	AAAMAKSKNHTTHNQ	0	7	486
RPL28	RPL28	P46779	19q13.42	K33-m1	15.75	Ribosomal_L28e	STEPNNLKARNSFRY	0	7	485
RPL22	RPL22	P35268	1p36.31	K80-m1	14.79	Ribosomal_L22e	TSEVPFSKRYLKYLT	0	7	480
RPL3	RPL3	P39023	22q13.1	K399-m2	46.11		LKKDRIAKEEGAAAA	0	7	492
RPL21	RPL21	P46778	13q12.2	K107-m1	18.56		KSRDSFLKRVKENDQ	0	7	479
RPL19	RPL19	P84098	17q12	K167-m1	23.47		EARRSKTKEARKRRE	0	7	478
RPL19	RPL19	P84098	17q12	K144-m1	23.47	Ribosomal_L19e	ILMEHIHKLKADKAR	0	7	477
RPL18A	RPL18A	Q02543	19p13.11	K128-m1	20.76	Ribosomal_L18A	AHSIQIMKVEEIAAS	0	7	476
RPL18A	RPL18A	Q02543	19p13.11	K2-m1	20.76		AAAAAAMKASGTLRE	0	7	475
RPL17	RPL17	P18621	18q21.1	K37-m1	21.4	Ribosomal_L22	RETAQAIKGMHIRKA	0	7	474
RPL3	RPL3	P39023	22q13.1	K394-m2	46.11		AFMGPLKKDRIAKEE	0	7	491
MATR3	matrin 3	P43243	5q31.2	K602-m1	94.62		RSYSPDGKESPSDKK	0	5	375
RPL5	RPL5	P46777	1p22.1	K5-m1	34.36		AAAMGFVKVVKNKAY	0	7	509
[truncated: 2,631 more rows]

## Sheet: Table 3
Supplementary Table 3. Hits resulting from the search of the lysine methylome for the SET8 recognition site identified from the permutation array experiments of H4K20 with SET8.
Array #	Spot #	Site	Gene	Protein	Uniprot ID	Human Chromosome Position	Modified Residue	MW (kD)	Domain	Normalized Permutation Score	Methylated by SET8 (0=no, 1=yes)
2	280	FSVKGHVKMLRLALT	CKLF	CKLF	Q9UBR5	16q21	K22-m1	17.17		0.874794	1
1	303	LAEKVFAKVLREEDS	AMPD3	AMPD3	Q01432	11p15.4	K27-m1	88.81		0.780941	0
2	223	GFDGGHRKPLFAIHW	CERKL	CERKL	Q49MI3	2q31.3	K230-m1	62.62	DAGK_cat	0.76533	0
5	513	QEIKGEVKVLNNITN	MSR1	MSR1	P21757	8p22	K245-m1	49.76		0.721743	0
6	194	RKHQHHKKTKRKHGP	NRDE2	NRDE2	Q9H7Z3	14q32.11	K97-m1	132.67		0.71447	0
3	259	VKIPVAIKELREATS	EGFR	EGFR	P00533	7p11.2	K745-m1	134.28	Pkinase_Tyr	0.700936	0
6	332	VADEDSVKVLDKATV	PAPD5	PAPD5	Q8NDF8	16q12.1	K210-m1	63.27	NTP_transf_2	0.689044	0
4	192	TGGKAPRKQLATKAA	HIST1H3A	H3	P68431	6p22.2	K18-m1	15.27	Histone	0.68715	0
9	409	LNPKPHKKKSPGEKP	ZNF449	ZNF449	Q6P9G9	Xq26.3	K315-m2	59.93		0.686744	0
7	68	PAQPSHWKVLSSSGS	PLEC	Plectin-1	Q15149	8q24.3	K977-m1	531.79		0.680971	0
9	141	APWCGHCKALAPTWE	TXNDC5	TXNDC5	Q8NBS9	6p24.3	K221-m1	47.63	Thioredoxin	0.678761	0
1	10	LATKHSRKALKASLT	HTR6	5-HT(6)	P50406	1p36.13	K262-m2	46.95	7tm_1	0.674839	0
7	481	QKIVKPVKVSAPRVG	RPL24	RPL24	P83731	3q12.3	K147-m1	17.78		0.67391	1
6	276	NRLKSLMKILSEVTP	OIP5	OIP5	O43482	15q15.1	K215-m2	24.69		0.67326	0
7	376	KGVGSARKKLDASIL	DPF2	requiem	Q92785	11q13.1	K195-m1	44.16		0.673232	0
5	347	LAETSYVKVLEHVVR	MAGEA4	MAGE-A4	P43358	Xq28	K286-m1	34.9		0.671851	0
2	404	VLNDIHKKIALVKKL	DAG1	DAG1	Q14118	3p21.31	K626-m1	97.44	DAG1	0.66859	0
1	365	CELEVFAKVLRALDK	APPBP2	APPBP2	Q92624	17q23.2	K68-m1	66.85		0.667639	0
8	163	PAILKHKKSLQKLVS	SH3BP1	SH3BP1	Q9Y3L3	22q13.1	K143-m2	75.71	BAR	0.663762	0
4	119	TQRKPGTKLLLPRAA	GTSE1	GTSE1	Q9NYZ3	22q13.31	K215-m1	76.64		0.661622	0
4	105	GGSCGPIKVKTEPTE	GTF2I	GTF2I	P78347	7q11.23	K219-m1	112.42		0.661211	0
8	416	KYGKSFRKLLSLCLQ	STK39	STLK3	Q9UEW8	2q24.3	K312-m1	59.47	Pkinase	0.657327	1
5	94	NDIHGLRKVIDDTNI	KRT18	K18	P05783	12q13.13	K187-m1	48.06	Filament	0.65685	0
3	116	QNPPGPVKLVMESIC	DNAH3	DNAH3	Q8TD57	16p12.3	K2796-m1	470.77	MT	0.656711	0
7	378	DSCPAVSKILERSLK	REV3L	REV3	O60673	6q21	K2868-m1	352.78	DNA_pol_B	0.656351	0
8	243	QPDKKSKKSLIGGNH	SLITRK4	SLITRK4	Q8IW52	Xq27.3	K792-m1	94.33		0.650408	0
5	475	REPCGHLKTSCEEQI	RC3H2	MNAB	Q9HBD1	9q33.2	K768-m1	131.67		0.649707	0
3	271	SLPGHAAKTLPGGAG	EHMT1	EHMT1	Q9H9B1	9q34.3	K153-m3	141.47		0.648904	0
1	523	TASGKKVKIAKESLD	BRCA2	BRCA2	P51587	13q13.1	K1533-m1	384.2	BRCA2	0.64874	0
3	480	SYLHTAKKKLMPGTY	FBN2	FBN2	P35556	5q23.3	K2861-m1	314.77		0.647937	0
5	533	HISCKDSKVVRCHFS	MTMR4	MTMR4	Q9NYA4	17q22	K95-m2	133.35		0.64744	0
1	204	SAPGKSIKALVDVSA	AHNAK2	AHNAK2	Q8IVF2	14q32.33	K1018-m1	616.63		0.647367	0
3	482	RASPPHSKAAPGDVK	FBRSL1	FBRSL1	Q9HCM7	12q24.33	K849-m2	110.91		0.644767	0
4	86	APWCGHCKRLAPEYE	PDIA3	GRP58	P30101	15q15.3	K61-m1	56.78	Thioredoxin	0.644521	0
6	8	GDREGVEKVLGELSM	MYO1A	MYO1A	Q9UBC5	12q13.3	K659-m1	118.4	Myosin_head	0.644521	0
7	85	KLPGIPIKIVMEAIQ	PNPT1	PNPT1	Q8TCS8	2p16.1	K569-m1	85.95		0.644163	0
2	406	SGEGHHLKSKRPNPC	PPP1R1B	DARPP-32	Q9UD71	17q12	K65-m1	22.96	DARPP-32	0.641179	0
8	349	EASGTDVKQLDQGNK	SPART	SPG20	Q8N0X7	13q13.3	K370-m1	72.83		0.640122	0
3	536	LPRPGVIKTIGTTVG	FOSL2	FRA2	P15408	2p23.2	K104-m1	35.19		0.639029	0
6	324	SVPGTYRKVVAARAP	PCLAF	PAF	Q15004	15q22.31	K15-m1	11.99	PAF	0.638815	0
3	303	KQNKKERKKMRAEDG	EIF4E	EIF4E iso4	D6RBW1	4q23	K11-m1	28.51		0.638133	0
3	385	EGGGGGRKVGRYRDD	ERCC6	ERCC6	Q03468	10q11.23	K448-me	168.42		0.635763	0
6	358	KKQKEIIKKLIERKQ	KAT2B	PCAF	Q92831	3p24.3	K671-me	93.01		0.635034	0
9	187	NISKKEYKLLYSMKE	URGCP	URG4	Q8TCY9	7p13	K371-m1	104.99		0.634386	0
9	300	TELPFKAKTLHEKTS	WIZ	WIZ	O95785	19p13.12	K1384-m1	178.67		0.633287	0
4	129	KAGGTPRKASGPPVS	HIST1H1C	H1C	P16403	6p22.2	K34-m1	21.36		0.631339	0
1	255	PDSPRPVKASREDSG	AKAP11	AKAP11	Q9UKA4	13q14.11	K438-m1	210.51		0.630084	0
7	406	IILVGNKKDLRQDEH	RHOC	RHOC	P08134	1p13.2	K119-m1	22.01	Ras	0.630058	0
1	552	PKRKHFIKDIRHLPV	CEBPZ	C/EBP-zeta	Q03701	2p22.2	K787-m1	120.97		0.628852	0
9	449	TGTGTPVKRVRKAIE	ZNF644	ZNF644	Q9H582	1p22.2	K1023-m2	149.57		0.628814	0
6	61	AMSGGLLKALRSDSY	NCBP2	NCBP2	P52298	3q29	K7-m1	18		0.627517	0
4	151	KYIKSHYKVGENADS	H1F0	H1F0	P07305	22q13.1	K59-m1	20.86	Linker_histone	0.626157	0
9	155	GGMQIFVKTLTGKTI	UBB	UBB	P0CG47	17p11.2	K82-m1	25.76	ubiquitin	0.624657	0
7	538	AAMQIFVKTLTGKTI	RPS27A	RPS27A	P62979	2p16.1	K6-m1	17.96	ubiquitin	0.624657	0
5	436	KARFSKKKILHRVRK	MICU1	MICU1 iso7	S4R3V1	10q22.1	K186-m1	24.47		0.624082	0
3	391	LFPKSDSKALDLLDR	MAPK3	ERK1	P27361	16p11.2	K302-m3	43.14	Pkinase	0.6236	0
7	505	KTHKGLRKVACIGAW	RPL3L	RPL3L	Q92901	16p13.3	K250-m1	46.3	Ribosomal_L3	0.622996	0
3	180	GHAKDHPKIAKIFEI	DRD2	DRD2	P14416	11q23.2	K336-m1	50.62	7tm_1	0.622696	0
1	356	RADVNSKKTLREVGS	APC	APC	P25054	5q22.2	K561-m2	311.65		0.618035	0
7	405	IILVGNKKDLRNDEH	RHOA	RHOA	P61586	3p21.31	K119-m1	21.77	Ras	0.617566	0
9	408	YECKTCRKAFGHYDN	ZNF443	ZNF443	Q9Y2A4	19p13.2	K539-m2	77.52	zf-C2H2	0.616833	0
8	244	LIGGNHSKIVVEQRK	SLITRK4	SLITRK4	Q8IW52	Xq27.3	K801-m1	94.33		0.615144	0
4	159	DKGGKAKKTAAAGGK	H1FX	H1X	Q92522	3q21.3	K188-m1	22.49		0.614759	0
7	569	KKLADYLKVLIDNKH	RUFY1	RUFY1	Q96T51	5q35.3	K225-m2	79.82	RUN	0.61449	0
8	594	VVSKPPAKSQRPEEE	TMF1	TMF1	P82094	3p14.1	K121-m1	122.84		0.61436	0
8	570	KMFKGFEKVKDVQYI	TIMP4	TIMP4	Q99727	3p25.2	K86-m1	25.5	TIMP	0.612904	0
6	350	DKLNVVKKTLITFVN	PARVA	PARVA	Q9NVD7	11p15.3	K266-m1	42.24	CH	0.612424	0
3	15	TDGGRTKKRLDPRIY	DDN	DDN	O94850	12q13.12	K271-m1	76	Dendrin	0.612314	0
5	310	YPVTGPKKTYITDPV	LPP	LPP	Q93052	3q27.3-q28	K353-m1	65.75		0.611722	0
3	115	ETTKDLAKALAKQCV	DNAH3	DNAH3	Q8TD57	16p12.3	K1444-m2	470.77	AAA_6	0.610458	0
5	476	TSSPEAVKKLLENMQ	MON2	MON2	Q7Z3U7	12q14.1	K11-m1	190.36	DCB	0.610275	1
1	59	DLTDYLMKILTERGY	ACTA1	ACTA1	P68133	1q42.13	K193-m1	42.05	Actin	0.608557	0
9	452	GPRPGARKSADPKRP	ZNF707	ZNF707	Q96C28	8q24.3	K89-m1	43.09		0.603552	0
3	414	LWAAHCRKIQLKKDG	EZH2	EZH2	Q15910	7q36.1	K505-m2	85.36		0.599179	0
9	12	PHAKKKSKISASRKL	TNNI3	TNNI3	P19429	19q13.42	K40-m3	24.01		0.598775	0
5	346	LAETSYVKVLEYVIK	MAGEA1	MAGE-A1	P43355	Xq28	K278-m1	34.34		0.597824	0
7	547	RYPDPVIKVNDTVQI	RPS4Y1	RPS4Y1	P22090	Yp11.2	K155-m1	29.46	Ribosomal_S4e	0.596615	0
2	211	GHGVPHGKLLKQKSE	CEP170	CEP170	Q5SW79	1q43	K440-m1	175.29		0.59649	0
8	230	THASLFKKILLGLLC	SLC28A2	SLC28A2	O43868	15q21.1	K79-m1	71.93		0.596275	0
6	27	PGRKPGFKLSREIMP	KAT6A	MYST3	Q92794	8p11.21	K1174-m1	225.03		0.59473	0
8	588	RALIPLAKVRRPPSL	TMEM132A	TMEM132A iso3	Q24JP5-3	11q12.2	K393-m1	44.36		0.594013	0
6	5	SLARFLKKTLSEKKP	MYO15A	MYO15A	Q9UKN7	17p11.2	K578-m3	395.29		0.59356	0
3	360	LNRYPHFKTKIEGLD	EPHX1	Ephx1	P07099	1q42.12	K117-m1	52.95	EHN	0.593515	0
4	176	SYSIYVYKVLKQVHP	HIST1H2BB	H2B	P33778	6p22.2	K43-m3	13.82	Histone	0.592533	0
9	175	QIVRHDLKELRDFDL	UGGT2	UGCGL2	Q9NYU1	13q32.1	K1343-m1	174.74	Glyco_transf_8	0.592069	0
5	212	AQEREQIKVLNDKFA	KRT74	KRT74	Q7RTS7	12q13.13	K145-m1	57.87	Filament	0.591412	0
8	181	DVVVKLRKISDWALK	SHPRH	SHPRH	Q149N8	6q24.3	K951-m2	193.08	SNF2_N	0.589441	0
4	186	SYSVYVYKVLKQVHP	HIST1H2BC	H2B1C	P62807	6p22.2	K44-m1	13.91	Histone	0.5893	0
8	196	TTQPTEFKIKLAAAA	POLDIP3	SKAR	Q9BY77	22q13.2	K418-m1	46.09		0.58863	0
4	139	PVKKKARKSAGAAKR	HIST1H1E	H1E	P10412	6p22.2	K26-m3	21.87		0.587755	0
7	544	AMARGPKKHLKRVAA	RPS4X	RPS4X	P62701	Xq13.1	K7-m1	29.6	RS4NT	0.587701	1
6	38	HKDLHCAKVLKAIGL	NAA25	NAA25	Q14CX7	12q24.13	K48-m1	112.29		0.587439	0
2	141	AAAMAAVKTLNPKAE	CCT6A	CCT6A	P40227	7p11.2	K5-m1	58.02		0.587383	0
5	388	SNVKSVYKTHIDVIH	MCM4	MCM4	P33991	8q11.21	K413-m1	96.56		0.585141	0
3	140	RHNLEIIKTLVECWK	PRKDC	DNAPK	P78527	8q11.21	K2239-m1	469.09		0.584117	0
2	84	RKTASSRKMLDEGMM	CASZ1	CASZ1	Q86V15	1p36.22	K1423-m1	190.07		0.584092	0
6	67	AAATPAKKTVTPAKA	NCL	NCL	P19338	2q37.1	K96-m1	76.61		0.58354	1
4	350	INDEDKQKILDKCNE	HSPA8	HSC70	P11142	11q24.1	K569-m1	70.9	HSP70	0.582562	1
6	80	IQKKLAAKGLRDPWG	NDUFB3	NDUFB3	O43676	2q33.1	K39-m3	11.4		0.58018	0
5	52	RVAADTVKELMCPEA	IQGAP3	IQGAP3	Q86VI3	1q22	K398-m2	184.7		0.579405	0
6	150	EVFVGPRKLCVKEMN	SLC12A1	NKCC2	Q13621	15q21.1	K722-m1	121.45	SLC12	0.578377	1
5	164	HIPKELKKDLHCHHL	KIF18A	KIF18A	Q8NI77	11p14.1	K534-m1	102.28		0.577472	0
8	170	ASQAKAYKSLGEGPP	SH3D19	SH3D19	Q5HYK7	4q31.3	K180-m1	86.53		0.577339	0
5	123	QQGKVTVKYDRKELR	PPP1R14C	KEPI	Q8TAE6	6q25.1	K75-m1	17.84	PP1_inhibitor	0.577216	1
7	149	RQGKVTVKYDRKELR	PPP1R14B	PPP1R14B	Q96C90	11q13.1	K59-m1	15.91	PP1_inhibitor	0.577216	0
7	331	DRPIGSRKVKLVLGA	RBM12	RBM12	Q9NTZ6	20q11.22	K926-m1	97.4	RRM_1	0.576165	1
7	430	TPEVKPLKSLLGDSA	AGFG1	RIP	P52594	2q36.3	K161-m1	58.26		0.576125	0
3	554	NRGGDISKIAPRTVY	LGALS8	galectin-8 iso2	O00214-2	1q43	K193-m1	40.4		0.575538	0
1	23	LLDGKEIKRLNVQWL	ABCB1	ABCB1	P08183	7q21.12	K1102-m1	141.48	ABC_tran	0.575086	0
7	56	GRGGQTVKSLRIQEQ	PKP2	plakophilin 2	Q99959	12p11.21	K52-m1	97.41		0.574983	0
9	283	WKTAAARKSLPASIT	NSD3	WHSC1L1	Q9BZ95	8p11.23	K477-m1	161.61		0.57495	0
5	317	LRNHETRKYLQEQAY	CARMIL1	LRRC16	Q5VZK9	6p22.2	K669-m1	151.56		0.57476	0
4	160	TAAAGGKKVKKAAKP	H1FX	H1X	Q92522	3q21.3	K196-m1	22.49		0.570439	0
2	100	QMDKMHKKATKWMNW	CCDC125	CCDC125	Q86Z20	5q13.2	K353-m3	58.63		0.570127	0
7	483	HVGIHPSKVVITRLK	RPL26	RPL26	P61254	17p13.1	K103-m1	17.26	Ribosomal_L26; KOW	0.570126	1
6	129	LKRKSQEKLSRARKL	NGLY1	NGLY1	Q96IV0	3p24.2	K210-m3	74.39		0.570054	0
8	437	LRRHHRSKTPRHLDP	SUV39H1	SUV39H1	O43463	Xp11.23	K105-m1	47.91		0.569506	0
4	167	GVIPHIHKSLIGKKG	H2AFV	H2AFV	Q71UI9	7p13	K116-m1	13.51	Histone_H2A_C	0.569174	0
3	532	ELYISIAKCLLEMTD	FOCAD	FOCAD	Q5VW36	9p21.3	K1558-m3	200.07	Focadhesin	0.567708	0
4	325	GPDEAKIKALLERTG	HNRNPR	hnRNP R	O43390	1p36.12	K128-m3	70.94		0.567384	0
9	431	AGAKRPVKAVAKLEP	ZNF518B	ZNF518B	Q9C0D4	4p16.1	K223-m1	119.53		0.567077	0
6	233	HICEDAVKRLKATGK	NUMB	NUMB iso3	P49757-3	14q24.2-q24.3	K63-m1	69.43	PID	0.566517	0
2	375	EVNPVWKKCLEEQGL	CTPS1	CTPS	P17812	1p34.2	K490-m1	66.69	GATase	0.566125	0
6	271	ERCDKENKILKDEMN	ODF2	ODF2	Q5BJF6	9q34.11	K572-m2	95.4		0.566118	0
5	354	RPGGGRVKIESVKLD	MAP2	MAP2	P11137	2q34	K1724-m1	199.53	Tubulin-binding	0.565951	0
8	22	MSDKLPYKVADIGLA	AHCY	SAHH	P23526	20q11.22	K8-m1	47.72	AdoHcyase	0.565945	0
2	67	TMSDTTFKALRRQLP	CAPZA1	CAPZA1	P52907	1p13.2	K256-m1	32.92	F-actin_cap_A	0.565787	0
9	117	LALKTLSKKVRKELS	TSR1	TSR1	Q2NL82	17p13.3	K42-m1	91.81		0.564949	0
1	347	DTSGDFRKLMVALAK	ANXA2	ANXA2	P07355	15q22.2	K169-m1	38.6	Annexin	0.564927	0
9	185	DVVEGYIKISVECVE	URB1	URB1	O60287	21q22.11	K73-m2	254.39		0.564729	0
5	95	VSETNDTKVLRHAAA	KRT18	K18	P05783	12q13.13	K426-m1	48.06		0.564652	1
7	194	LRKPSLAKALQAGPL	PRR11	PRR11	Q96HE9	17q22	K212-m1	40.09		0.564058	0
5	236	KQYRICLKTLKEEFQ	LARGE1	LARGE	O95461	22q12.3	K728-m3	88.07	Glyco_transf_49	0.563962	0
9	51	GMLQAEKKLLEEDVK	TPR	TPR	P12270	1q31.1	K1326-m3	267.29		0.563959	0
8	306	QTVGKSSKMLQHIDY	SNRPN	snRNP N iso3	B3KVR1	15q11.2	K12-m1	25.08	LSM	0.563591	0
5	387	NVNCEHIKSFDKNLY	MCM4	MCM4	P33991	8q11.21	K216-m1	96.56	MCM_N	0.563275	1
2	95	KQNGKSKKVEEAEPE	CBX3	CBX3	Q13185	7p15.2	K21-m1	20.81		0.562444	0
4	137	VSLAALKKALAAAGY	HIST1H1D	H1D	P16402	6p22.2	K65-m1	22.35	Linker_histone	0.56152	0
4	405	MAGQAFRKFLPLFDR	HSPE1	HSPE1	P61604	2q33.1	K8-m1	10.93	Cpn10	0.560507	0
5	447	SSMQGKRKALKLNFA	MAP2K4	MKK4	P45985	17p12	K42-m1	44.29		0.560301	1
5	153	EKYKKHPKTDSSVTK	KIAA1257	KIAA1257	Q9ULG3	3q21.3	K105-m2	46.74		0.559949	0
3	209	TNNGIHYKLQLLYSN	EBF3	EBF3	Q9H4W6	10q26.3	K111-m1	64.86	COE1_DBD	0.559001	0
3	531	LPNKIRRKDLELYIS	FOCAD	FOCAD	Q5VW36	9p21.3	K1548-m3	200.07	Focadhesin	0.556977	0
7	516	IFNGTFVKLNKASIN	RPL7	RPL7	P18124	8q21.11	K124-m1	29.23	Ribosomal_L30	0.556278	1
7	381	SAVPGLSKTSGRRVV	REXO1	REXO1	Q8N1G1	19p13.3	K884-m1	131.51	EloA-BP1	0.556093	0
4	275	SKNKGAAKTRKTTTT	HMGA1	HMGA1	P17096	6p21.31	K71-m1	11.68		0.555409	0
5	190	HKKKAIVKEVIDKYT	KIN	KIN	O60870	10p14	K306-m1	45.37		0.555088	0
7	144	GSRGSPRKAATDGAD	PPP1R13L	PPP1R13L	Q8WUF5	19q13.32	K87-m1	89.09		0.554465	0
3	492	GSTKKKAKTGAAGKF	FEN1	FEN1	P39748	11q12.2	K369-m1	42.59		0.553222	0
5	331	AAAMGDVKALLFVVA	LTBP4	LTBP4 iso3	Q8N2S1-3	19q13.2	K5-m1	169.48		0.553097	0
5	242	KFAKVPLKCLAQEVN	LAS1L	LAS1L	Q9Y4W2	Xq12	K139-m1	83.06	Las1	0.552721	0
5	60	PDPHRGAKVIRADPQ	IRS2	IRS2	Q9Y4H2	13q34	K1134-m2	137.33		0.552685	0
2	165	TEGASARKTQTPAAQ	CDC73	CDC73	Q6P1J9	1q31.2	K331-m1	60.58		0.551862	0
1	400	DSPHKSLKCLAAETI	ARMC4	ARMC4	Q5T2S8	10p12.1	K552-m1	115.68		0.551098	0
3	295	EHEQIKKKTVRERLE	EIF3A	eIF3-theta	Q14152	10q26.11	K634-m1	166.57		0.550927	0
4	85	HPPEPPKKGLLQRLF	GRK5	GRK5	P34947	10q26.11	K548-m3	67.79		0.549602	0
3	111	NEFKIVLKELEDSLL	DNAH17	DNAH17	Q9UFH2	17q25.3	K3593-m3	509.31	AAA_9	0.549209	0
6	182	NVQEKKRKSLDNEVE	NOSTRIN	NOSTRIN	Q8IVI9	2q24.3	K113-m2	57.66		0.548946	0
7	497	KFLVHNVKELEVLLM	RPL32	RPL32	P62910	3p25.2	K83-m1	15.86	Ribosomal_L32e	0.548792	0
9	353	ATTGPQVKRADEWKD	ZC3H18	ZC3H18	Q86VM9	16q24.2	K510-m1	106.38		0.548402	0
6	189	CRLKKCLKVGMRREA	NR2F1	NR2F1	P10589	5q15	K148-m1	46.16	zf-C4	0.548226	0
5	124	PKFNFVGKILGPQGN	KHDRBS1	KHDRBS1	Q07666	1p35.2	K175-m1	48.23	KH_1	0.548135	0
4	76	NGTASSRKTLWNQEL	GPKOW	GPKOW	Q92917	Xp11.23	K315-m1	52.23		0.547728	0
7	461	KESQEHTKDLDKELD	PHAX	RNUXA	Q9H814	5q23.2	K169-m2	44.4		0.547171	0
6	130	LQRPQLSKVKRKKPR	NHEJ1	NHEJ1	Q9H9Q4	2q35	K288-m3	33.34		0.54649	1
1	86	ARSTEYRKILNQNEL	EOGT	AER61	Q5NDL2	3p14.1	K378-m1	62.01	DUF563	0.546344	0
3	330	GMMAGGKKHLDFAAA	ELP4	ELP4	Q96EB1	11p13	K420-m1	46.59	PAXNEB	0.544912	0
7	238	SKTFPTRKVAKEGGP	PUM3	PUM3	Q15397	9p24.2	K39-m1	73.58		0.544179	0
6	131	VQQSCNYKQLRKGAN	SNU13	NHP2L1	P55769	22q13.2	K33-m1	14.17	Ribosomal_L7Ae	0.543841	0
7	415	APSIATIKSLADCNF	RICTOR	RICTOR	Q6R327	5p13.1	K1312-m1	192.22		0.54317	0
4	136	GATAGKRKASGPPVS	HIST1H1D	H1D	P16402	6p22.2	K35-m1	22.35		0.543136	0
1	305	SGKHSSRKVDSPFGP	PRKAG2	AMPKG2	Q9UGJ0	7q36.1	K62-m1	63.07		0.543131	0
5	256	KMISTSIKTARKSKR	LCOR	LCOR iso3	Q96JN0-3	10q24.1	K450-m1	170.48		0.542306	0
7	54	AMNHSPLKTALAYEC	PKP1	plakophilin 1	Q13835	1q32.1	K7-m1	82.86		0.542163	0
8	251	RRGPTSKKEPRKRRK	SLX4	SLX4	Q8IY92	16p13.3	K405-m2	200.01		0.541872	0
9	321	PGGGGRAKGLKDIRI	YTHDC2	YTHDC2	Q9H6S0	5q22.2	K34-m1	160.25		0.541785	0
2	245	QMQKKYYKFILTRNF	CHD5	CHD-5	Q8TDI0	1p36.31	K961-m2	223.05	SNF2_N	0.541333	0
3	568	DDIKKVVKQASEGPL	GAPDH	GAPDH	P04406	12p13.31	K263-m2	36.05	Gp_dh_C	0.54014	0
3	519	LGEGGAHKVRAGGTG	FLNC	FLNC	Q14315	7q32.1	K2316-m1	291.02	Filamin	0.538726	0
4	135	PVKKKAKKAGATAGK	HIST1H1D	H1D	P16402	6p22.2	K26-m1	22.35		0.538613	0
3	156	GDLVGVIKKKDPMGS	DNMBP	DNMBP	Q6XZF7	10q24.2	K1316-m1	177.35		0.538555	0
5	383	VLCETFRKRLVLSVK	MCHR1	MCHR1	Q99705	22q13.2	K389-m1	45.96		0.537952	1
7	425	DRQKKKVKEEHKPQL	RIMS2	RIMS2	Q9UQ26	8q22.3	K52-m1	160.4		0.537691	1
3	445	KQKRKEKKTADLSQA	FAM228A	FAM228A	Q86W67	2p23.3	K151-m1	23.75		0.537606	0
8	595	EPLKGRAKTPVTLKQ	TMPO	TMPO	P42167	12q23.1	K207-m1	50.67		0.537346	0
8	431	DSSEIHFKVKMTTHL	SUMO1	SUMO1	P63165	2q33.1	K37-m1	11.56	Rad60-SLD	0.537264	0
7	410	QAHRQAEKTLDTEWK	RIBC1	RIBC1	Q8N443	Xp11.22	K304-m1	44.01	RIB43A	0.536964	0
3	208	PALNKPKKPLTSSSA	MAPRE1	EB1	Q15691	20q11.21	K151-m1	30		0.536899	0
5	556	NLEKKQRKFDQLLAE	MYH11	MYH11	P35749	16p13.11	K1452-m1	227.34	Myosin_tail_1	0.536281	0
5	559	TLEKKQRKFDQLLAE	MYH14	MYH14	Q7Z406	19q13.33	K1469-m1	227.87	Myosin_tail_1	0.536281	0
3	83	KSKKFTLKRLMADEL	DIAPH1	Diaphanous-1	O60610	5q31.3	K42-m1	141.35		0.535965	1
7	223	RSLADFEKALTDYRA	PSMD11	PSMD11	O00231	17q11.2	K304-m1	47.46	PCI	0.535907	0
5	254	NPPKKKMKLMRSEGP	LCOR	LCOR	Q96JN0	10q24.1	K402-m3	47.01		0.535548	0
3	207	HEYIQNFKILQAGFK	MAPRE1	EB1	Q15691	20q11.21	K76-m1	30	CH	0.535541	0
8	296	LLSQSPKKVTAETDF	SRCIN1	SNIP	Q9C0H9	17q12	K719-m1	112.45		0.53522	0
4	95	PSAFGSMKVSRDKDG	GSK3B	GSK3B	P49841	3q13.33	K27-m1	46.74		0.534612	0
2	361	LLNKHGIKTVSQIIS	RSL1D1	CSIG	O76021	16p13.13	K124-m1	54.97	Ribosomal_L1	0.534591	0
9	373	KTVKKKIKPTLPLRI	ZGRF1	ZGRF1 iso6	Q86YA3-6	4q25	K866-m3	102.96		0.534226	0
7	12	RPRKTNFKGLSEDTR	PHF6	PHF6	Q8IWS0	Xq26.2	K173-m1	41.29		0.534187	0
9	306	LGSKRGNKDLRARAD	WNT9B	WNT9B	O14905	17q21.32	K184-m1	39	wnt	0.534056	0
5	21	GHKNRYVKVPRGHIW	IMMP2L	IMMP2L	Q96T52	7q31.1	K112-m1	19.72	Peptidase_S24	0.533919	1
5	497	NAKLKVVKHLIRIKP	MRPL30	MRPL30	Q8TCC3	2q11.2	K114-m1	18.55	Ribosomal_L30	0.533646	0
5	131	GGGPGIRKDAFADAV	KHSRP	KHSRP	Q92945	19p13.3	K71-m1	73.12		0.533603	0
6	41	RSEKKARKAMSKLGL	NACA	NACA	E9PAV3	12q13.3	K1941-m1	205.42	NAC	0.533554	0
4	207	GLGKGGAKRHRKVLR	HIST1H4A	H4	P62805	6p22.2	K16-m3	11.24		0.532913	1
8	80	KLLRTHFKKSLDDGK	SEC23IP	SEC23IP	Q9Y6Y8	10q26.11-q26.12	K484-m1	111.08		0.532641	0
5	9	EVDYSVSKKLRSRKI	IGF2BP2	IGF2BP2	Q9Y6M1	3q27.2	K77-m1	66.12		0.532366	1
2	337	LLVPGTYKITASARG	CPD	CPD	O75976	17q11.2	K841-m1	152.93	CarboxypepD_reg	0.532204	0
7	489	KTHRGLRKVACIGAW	RPL3	RPL3	P39023	22q13.1	K250-m1	46.11	Ribosomal_L3	0.532164	0
6	291	VYHKPLWKIIPTTQP	OSBPL11	OSBPL11	Q9BXB4	3q21.2	K738-m1	83.64	Oxysterol_BP	0.532117	0
4	210	EETRGVLKVFLENVI	HIST1H4A	H4	P62805	6p22.2	K59-m1	11.24	CENP-T_C	0.532077	0
4	219	PADKTNVKAAWGKVG	HBA2	HBA1	P69905	16p13.3	K12-m1	15.26	Globin	0.531631	0
6	231	ERTRKRRKSDRDQRF	NUGGC	NUGGC	Q68CJ6	8p21.1	K29-m2	91.13		0.531454	0
3	485	EQIKADMKAARDIPE	FBXO38	FBX38	Q6PIJ6	5q32	K686-m1	133.94		0.530484	0
6	59	DTEPTNFKVAAGTLD	NCAPH	NCAPH	Q15003	2q11.2	K152-m1	82.56	Cnd2	0.530383	0
4	73	LVIKKVSKEDPAAAF	GPBP1L1	GPBP1L1	Q9HC44	1p34.1	K203-m1	52.3		0.52985	0
3	324	SRSKPKKKSKKHKDK	ELL	ELL	P55199	19p13.11	K451-m2	68.26		0.529458	0
9	193	ERQKFCFKVFDVDRD	USP32	USP32	Q8NFA0	17q23.1-q23.2	K274-m2	181.66	EF-hand_5	0.529213	0
8	433	DGSVVQFKIKRHTPL	SUMO2	SUMO2	P61956	17q25.1	K33-m1	10.87	Rad60-SLD	0.527759	0
8	574	EWEKGKDKEVRGTKL	TTN	Titin	Q8WZ42	2q31.2	K17400-m2	3816.03	fn3	0.527682	0
5	247	EKLATCSKDLSGFSN	TRANK1	LBA1	O15050	3p22.2	K312-m1	336.22		0.527561	0
8	320	PSRKGSFKIRLSRLF	SOCS7	SOCS7	O14512	17q12	K211-m1	62.97		0.527101	0
3	567	AKYDDIKKVVKQASE	GAPDH	GAPDH	P04406	12p13.31	K260-m2	36.05	Gp_dh_C	0.527009	1
9	218	AIAPKREKTHGEVER	VCP	VCP	P55072	9p13.3	K315-m2	89.32	AAA	0.526545	0
5	495	YKYMKERKTPIERIP	ARID5B	Mrf-2	Q14865	10q21.2	K336-m2	132.37	ARID	0.526392	0
5	525	EFKIKGRKASKPISD	MTF2	MTF2	Q9Y483	1p22.1	K378-m1	67.11		0.526147	0
5	226	VKEEKAYKALKMMKE	LACTB	LACTB	P83111	15q22.2	K237-m3	60.69	Beta-lactamase	0.525741	0
4	261	PSSKAKAKSLSEAFE	HJURP	HJURP	Q8NCD3	2q37.1	K495-m1	83.54		0.525735	0
3	152	KRMYSQLKTLQKPVL	DNMBP	DNMBP	Q6XZF7	10q24.2	K469-m1	177.35		0.525674	0
7	24	KDIFPNEKVLSRIQK	ERCC6L	PICH	Q2NKX8	Xq13.1	K55-m1	141.1		0.525201	0
9	272	ISKKEEKKTFQKSPK	WDR87	WDR87	Q6ZQQ6	19q13.13	K1394-m2	333.19		0.525036	1
4	194	LATKAARKSAPATGG	HIST1H3A	H3	P68431	6p22.2	K27-me	15.27	Histone	0.524748	0
9	170	ELLQKEYKVELDLWL	UBTFL6	UBTFL6	P0CB48	2q11.2	K288-m1	46.55		0.52456	0
6	28	HLESTKKKELEEQPT	KAT6A	MYST3	Q92794	8p11.21	K1330-m2	225.03		0.523905	0
3	517	QSWRSPLKALSEFFK	FLNB	FLNB iso8	O75369-8	3p14.3	K1477-m1	281.63	Filamin	0.523864	0
3	306	WNTVPISKGSRPIDT	EIF4G1	eIF4G	Q04637	3q27.1	K1059-m1	175.49		0.523673	0
8	240	NCSCIERKTEITSTA	SLCO4C1	SLCO4C1	Q6ZQN7	5q21.1	K551-m2	78.95	OATP	0.523637	0
3	33	SDEDDWSKPLPPSER	DDX3X	DDX3	O00571	Xp11.4	K138-m1	73.24		0.523445	0
2	172	EITGWDEKALRSFRE	ARHGAP31	CdGAP	Q2M1Z3	3q13.32-q13.33	K1002-m1	156.98		0.523305	0
9	181	KAPEDKKKRLEDDKR	UPF2	UPF2	Q9HAU5	10p14	K58-m3	147.81		0.522993	0
3	452	LAKKEQSKELQMKLE	FAM50A	FAM50A	Q14320	Xq28	K95-m1	40.24		0.522733	0
3	121	RETKCMIKMKLDVPE	DNAH8	DNAH8	Q96JB1	6p21.2	K617-m2	514.66	DHC_N1	0.522695	0
5	503	KRMKANIKLVGSGFP	MSANTD4	MSANTD4	Q8NCY6	11q22.3	K90-m1	41.15		0.522422	0
1	559	AHKPAKSKTAAAASE	C19orf53	C19orf53	Q9UNZ5	19p13.13	K17-m1	10.58	DUF2462	0.522261	0
3	134	KHLELGKKLLAAGQL	DNAJC3	DNAJC3	Q13217	13q32.1	K46-m2	57.58	TPR_21	0.52218	0
2	336	LMQTDKLKQLRQTVK	CCP110	CP110	O43303	16p12.3	K821-m2	113.42		0.522177	0
4	247	CQKPSTSKVILRAVA	HILS1	HILS1	P60008	17q21.33	K119-m3	25.63	Linker_histone	0.522143	0
1	90	CDHGKGKKSSLAELK	AFAP1L1	AFAP1L1	Q8TED9	5q32	K376-m1	86.43		0.522023	0
9	278	GSPPGRKKTTVSMPR	NSD2	WHSC1	O96028	4p16.3	K443-m3	152.26		0.521651	0
7	11	SRKGRPRKTNFKGLS	PHF6	PHF6	Q8IWS0	Xq26.2	K169-m1	41.29		0.521202	0
7	95	LPSGPSLKHLTDPSY	POLR1B	POLR1B	Q9H9Y6	2q14.1	K17-m1	128.23		0.521179	0
4	291	AAAMPKRKVSSAEGA	HMGN1	HMGN1	P05114	21q22.2	K5-m1	10.66	HMG14_17	0.520757	0
9	305	LAMADFRKTGDYLWR	WNT2	WNT2	P09544	7q31.2	K229-m2	40.42	wnt	0.520482	0
4	299	GAHLTVKKIFVGGIK	HNRNPA1	hnRNP A1	P09651	12q13.13	K106-m1	38.75		0.52048	0
4	324	TKGPDEAKIKALLER	HNRNPR	hnRNP R	O43390	1p36.12	K126-m3	70.94		0.520419	0
6	200	SKGPDEAKIKALLER	SYNCRIP	NSAP1	O60506	6q14.3	K123-m3	69.6		0.520419	0
8	421	KLLKVQTKYLGRQWR	STRIP1	STRIP1	Q5VSL9	1p13.3	K722-m1	95.58	DUF3402	0.520296	0
3	343	DLYKSFIKDYPVVSI	ENO1	ENO1	P06733	1p36.23	K285-m1	47.17	Enolase_C	0.520244	0
7	442	TRLPHLLKTKLEDAN	RNF123	RNF123	Q5XPI4	3p21.31	K991-m1	148.51		0.519959	0
5	385	GSPKPAIKSISASAL	MCM10	MCM10	Q7L590	10p13	K554-m1	98.18	Mcm10	0.519613	0
4	43	PMHNKRSKIKPDEDL	GLI3	GLI3	P10071	7p14.1	K436-m1	169.86		0.518204	0
5	434	AAEGRVLKALQGCAQ	MIB2	MIB2	Q96AX9	1p36.33	K842-m1	109.94		0.518113	0
9	326	CPHKGCTKMFRDNSA	YY1	YY1	P25490	14q32.2	K305-m1	44.71		0.518094	0
1	469	NMDNLIYKLLKPSTK	B3GALT1	B3GALT1	Q9Y5Z6	2q24.3	K190-m2	37.99	Galactosyl_T	0.517813	0
6	68	KKGATPGKALVATPG	NCL	NCL	P19338	2q37.1	K116-m1	76.61		0.517217	0
6	179	AAMAKAKKVGARRKA	NOP14	NOP14	P78316	4p16.3	K6-m1	97.67		0.517205	0
8	340	ESRKPPLKASLSLRK	SPATA2	SPATA2	Q9UM82	20q13.13	K269-m1	58.43		0.516937	0
5	517	VLKQAVRKPLEAVLR	MTA1	MTA1	Q13330	14q32.33	K532-m2	80.79	MTA_R1	0.516728	0
9	372	QQKTVKKKIKPTLPL	ZGRF1	ZGRF1 iso6	Q86YA3-6	4q25	K864-m3	102.96		0.516472	0
6	216	SRPVRNRKVVDYSQF	NUCKS1	NUCKS	Q9H1E3	1q32.1	K9-me	27.3		0.516183	0
5	314	LKTFVDRKNLGDNTI	LRIF1	LRIF1	Q5T3J3	1p13.3	K325-m3	84.57	LRIF1	0.516009	0
8	382	DKKNKTKKTKAAAAA	SRP14	SRP14	P37108	15q15.1	K105-m1	14.57		0.515948	0
3	332	KLVKSAFKTAQETST	AHCTF1	ELYS	Q8WYP5	1q44	K1716-m1	252.5		0.515803	0
7	232	TTYKDKRKWKPKFWR	ZFC3H1	PSRC2	O60293	12q21.1	K1287-m2	226.36		0.515739	0
4	124	AKKKATKKAAGAGAA	HIST1H1B	H1B	P16401	6p22.1	K27-m1	22.58		0.515243	0
9	296	SPPPTARKMFPGLAA	WIZ	WIZ	O95785	19p13.12	K1162-m1	178.67		0.515014	0
7	530	PTVGMNFKTPRGPVA	RPS17	RPS17	P08708	15q25.2	K129-m1	15.55		0.514904	0
2	190	GVTASKRKFIDDRRD	CDYL	CDYL	Q9Y232	6p25.1	K314-m1	66.48		0.514692	0
4	255	LATKVARKSAPATGG	HIST3H3	HIST3H3	Q16695	1q42.13	K28-m1	15.51	Histone	0.514371	0
8	172	LRPISKSKTDLPEEK	SH3PXD2B	SH3PXD2B	A1X283	5q35.1	K619-m1	101.58		0.514342	0
5	356	CGSKDNIKHSAGGGN	MAP2	MAP2 iso4	P11137-4	2q34	K416-m1	58.95	Tubulin-binding	0.514037	0
8	120	KKRGRPAKTNDTMTK	SETBP1	SETBP1	Q9Y6X0	18q12.3	K1024-m2	175.01		0.513887	0
6	320	AQRKEERKAHLTNQY	PABPC4	PABP 4	Q13310	1p34.3	K375-m1	70.78		0.513843	0
9	414	PAVSAAVKGLRSHER	ZNF462	ZNF462	Q96JM2	9q31.2	K2004-m1	284.69		0.513644	0
5	421	SAPVDFSKIDPSKPE	MESD	MESDC2	Q14696	15q25.1	K95-m1	26.08	Mesd	0.513598	0
9	309	WCHVHLKKSLSGSPL	BAZ1B	WSTF	Q9UIG0	7q11.23	K344-m1	170.9		0.512776	0
4	276	KGAAKTRKTTTTPGR	HMGA1	HMGA1	P17096	6p21.31	K74-m1	11.68		0.512715	0
6	221	TVTPSPVKGKGKVGR	NUCKS1	NUCKS	Q9H1E3	1q32.1	K184-m1	27.3		0.512305	0
9	65	IDHLSIEKLLIDSVH	MED14	Trap170	O60244	Xp11.4	K399-m2	160.61		0.511984	0
2	260	ESRRCFVKVRAYRSE	CILP	CILP	O75339	15q22.31	K755-m3	132.56		0.511906	0
5	553	NLEKKQKKFDQLLAE	MYH10	MYH10	P35580	17p13.1	K1452-m1	229	Myosin_tail_1	0.511724	0
6	190	NKFGPMYKRDRALKQ	NR5A2	NR5A2	O00482	1q32.1	K173-m2	61.33		0.511443	1
8	472	IYLMRMVKALMDNPT	TAF6	TAF6	P49848	7q22.1	K287-m2	72.67		0.510629	0
2	359	KTEQFYRKLLNKHGI	RSL1D1	CSIG	O76021	16p13.13	K116-m1	54.97	Ribosomal_L1	0.510525	0
8	110	INTLFKSKISRKSVQ	09-Sep	09-Sep	Q9UHD8	17q25.3	K322-m1	65.4	Septin	0.5104	0
5	360	QPGGGRAKVEKKTEA	MAP4	MAP4	P27816	3p21.31	K955-m1	121		0.510387	0
7	310	DSRLDDKKFLYSAPR	FAM208A	RAP140	Q9UK61	3p14.3	K586-m1	189.03		0.510305	0
2	275	SQVEADLKMLRTAVD	CKAP4	CKAP4	Q07065	12q23.3	K551-m3	66.02		0.510252	0
3	478	TPQKSSWKLLTVNVK	FAT2	FAT2	Q9NYQ8	5q33.1	K804-m3	479.32	Cadherin	0.510119	0
2	350	SPEDLTVKVQDDFVE	CRYAA	CRYA1	P02489	21q22.3	K88-me	19.91	HSP20	0.510051	0
5	521	SRLKRRSKDLNCLYP	MTBP	MTBP	Q96DY7	8q24.12	K739-m1	102.19	MTBP_C	0.510038	0
6	251	AITTPNFKKLHEAHF	NUSAP1	NUSAP1	Q9BXS6	15q15.1	K186-m1	49.45	NUSAP	0.509878	0
1	281	DVVQEATKVLRNAAG	ALDH4A1	ALDH4A1	P30038	1p36.13	K495-m2	61.72	Aldedh	0.509851	0
3	213	KQYGLKMKTSRAFFS	PA2G4	Ebp1	Q9UQ80	12q13.2	K260-m1	43.79	Peptidase_M24	0.509643	0
4	157	RKQGGAAKDTRAQSG	H1FOO	H1FOO	Q8IZA3	3q22.1	K205-m1	35.81		0.509348	0
2	4	APVPTKTKVAVDENK	C2orf40	C2orf40	Q9H1Z8	2q12.2	K50-m2	17.18	Augurin	0.509164	0
3	179	PEKNGHAKDHPKIAK	DRD2	DRD2	P14416	11q23.2	K332-m1	50.62	7tm_1	0.509091	0
9	210	SDRKVCFKVKTTAPR	VAPA	VAPA	Q9P0L0	18p11.22	K50-m1	27.89	Motile_Sperm	0.508516	0
4	158	PTAHKAKKAAPGAAG	H1FX	H1X	Q92522	3q21.3	K146-m1	22.49		0.508507	0
8	549	DISIARRKDLALWTV	THAP9	THAP9	Q9H5L6	4q21.22	K667-m3	103.41		0.508235	0
4	330	QQAGGKKKAEGGGGG	HNRNPU	hnRNP U	Q00839	1q44	K215-m1	90.58		0.508087	0
4	323	EFSGNPIKVSFATRR	FUS	hnRNP P2	P35637	16p11.2	K365-m1	53.43	RRM_1	0.508036	0
1	286	KVLAAVYKALSDHHI	ALDOA	ALDOA	P04075	16p11.2	K215-m1	39.42	Glycolytic	0.507719	0
1	291	KVLAAVYKALSDHHV	ALDOC	ALDOC	P09972	17q11.2	K215-m1	39.46	Glycolytic	0.507719	0
2	313	MPGDPGVKGDRGFDG	COL11A2	COL11A2	P13942	6p21.32	K555-m1	171.79	Collagen	0.507391	0
1	279	HQRPCLLKSLKREGA	ALDH3A2	ALDH3A2	P51648	17p11.2	K428-m1	54.85		0.507387	0
6	368	AMPKGGRKGGHKGRA	PDAP1	PDAP1	Q13442	7q22.1	K7-m1	20.63		0.507334	0
5	15	RSQSCETKLLDEKTS	IL16	IL16	Q14005	15q25.1	K978-m3	141.75		0.506993	1
8	338	LIGKGAAKDAAHMLQ	SPAG7	SPAG7	O75391	17p13.2	K177-m1	26.03		0.506646	0
8	335	VPAPGKKKAQYEEPQ	SPAG17	SPAG17	Q6Q759	1p12	K404-m1	251.74		0.50609	0
8	388	QFAQGDRKTPGQMKS	SRSF12	SRRP35	Q8WXF0	6q15	K91-m1	30.51		0.505871	0
4	70	RSRKDEKKQEKALRR	GPATCH8	GPATCH8	Q9UKJ3	17q21.31	K188-m1	164.2		0.505446	0
9	132	LVLDRIRKLTDACSG	TUBA8	TUBA8	Q9NY65	22q11.21	K124-m2	50.09	Tubulin	0.505424	0
6	180	KKVGARRKASGAPAG	NOP14	NOP14	P78316	4p16.3	K12-m1	97.67		0.504629	0
4	304	NRGKAGVKRSAAEMY	HNRNPC	hnRNP C1/C2	P07910	14q11.2	K98-m1	33.67		0.504388	0
7	117	VNMKTDFKAQLARCQ	POP7	POP7	O75817	7q22.1	K46-m1	15.65	Rpp20	0.504103	0
7	465	GGSNTNWKTLYEVKS	RPA1	RPA1	P27694	17p13.3	K443-m1	68.14		0.503754	0
9	158	QPKKKEGKISSKTAA	UBE2E2	UBE2E2	Q96LR5	3p24.3	K44-m2	22.26		0.503534	0
3	370	GQRKDPSKNQGGGLS	EPRS	EPRS	P07814	1q41	K991-m1	170.59		0.503481	0
4	295	GEKGSARKAGPAKEQ	JPT2	HN1L	Q9H910	16p13.3	K147-m1	20.06		0.503399	0
1	366	TEQKSKSKQHRVSRR	PDS5B	APRIN	Q9NTI5	13q13.1	K1344-m1	164.67		0.50324	0
4	203	PSTGGVKKPHRYRPG	H3F3A	H3F3A	P84243	1q42.12	K37-m1	15.2	Histone	0.503236	0
4	196	PATGGVKKPHRYRPG	HIST1H3A	H3	P68431	6p22.2	K37-m1	15.27	Histone	0.503236	0
9	150	EDSDEQIKQLEDALK	UACA	UACA	Q9BZF9	15q23	K493-m1	162.51		0.502713	0
7	537	AAAMPLAKDLLHPSP	RPS27	RPS27	P42677	1q21.3	K5-m1	9.46		0.502683	0
7	44	AKRTGMQKVLYSTAM	PIP5K1B	PIP5K1B	O14986	9q21.11	K301-m3	61.04	PIP5K	0.50241	0
7	39	ENMPSHFKFKEYCPM	PIP4K2A	PIP4K2A	P48426	10p12.2	K89-m1	46.22		0.502402	0
7	42	ENLPSHFKFKEYCPQ	PIP4K2C	PIP4K2C	Q8TBX8	12q13.3	K99-m1	47.3		0.502402	0
1	410	AVYIAPLKALVRERM	ASCC3	ASCC3	Q8N3C0	6q16.3	K1382-m1	251.46	DEAD	0.502398	0
6	239	SFSGRKIKTAVRRRK	NUP153	NUP153	P49790	6p22.3	K1468-m1	153.94	Nup_retrotrp_bd	0.502265	0
2	177	INEKGELKLADFGLA	CDK17	CDK17	Q00537	12q23.1	K328-m1	59.58	Pkinase	0.501971	0
2	81	YDAKTEDKVRVMADS	CASP4	CASP4	P49662	11q22.3	K53-m1	43.26	CARD	0.501768	0
7	361	LVEHIWKKIMHTDAM	RBP3	RBP3	P10745	10q11.22	K1070-m3	135.36	Peptidase_S41	0.501059	0
3	72	PARSTHLKTPASGLQ	ESS2	DGCR14	Q96DF8	22q11.21|22q11.2	K429-m1	52.57		0.500974	0
7	509	AAAMGFVKVVKNKAY	RPL5	RPL5	P46777	1p22.1	K5-m1	34.36		0.500833	0
5	471	LSAKKRKKSSSEALF	MLLT3	MLLT3	P42568	9p21.3	K300-m1	63.35		0.500387	0

## Sheet: Table 4
Supplementary Table 4. Hits resulting from the search of the entire proteome, isolated to the surface exposed lysine sites for the SET8 recognition site identified from the permutation array experiments of H4K20 with SET8. Permutation matrix (as determined by PeSA2.0) is applied to calculate permutation score across the sequence. A random subset of 100 sites was tested with peptide arrays, and su…
Spot #	Site	Uniprot ID	K Pos	Normalized Permutation Score	Methylated by SET8 (0=no, 1=yes)
2	AADDFRVKYETELAM	P05783	167	0.608199	0
3	ENKLLKGKNTLANKE	Q96KP6	144	0.522609	0
4	NCIPLILKFFNQNIM	Q5VSL9	615	0.579921	0
5	CATKLFKKYAEKYSA	Q6PIW4	61	0.643083	0
7	MSASKTGKHGHAKVH	Q6IS14	50	0.56035	0
8	AGKYKTWKKWLDDEG	Q7LGC8	322	0.516733	0
9	DGTEEADKSAYLMGL	P12883	383	0.567595	0
10	EAFENLGKRSLEAGR	Q8NCD3	506	0.580506	0
11	KAVKKTPKKAKKPAA	P16401	157	0.542222	0
12	LKHPQIQKKSQYIKY	Q70E73	477	0.507693	0
13	GDSSGCIKPPKSPLS	A8MW92	364	0.513625	0
14	LKAFVPAKRPIAARP	Q8IWI9	1525	0.517023	0
15	GDKSPKNKFQPANKF	Q15397	81	0.556614	0
16	CHLPAVSKVLPAFRE	O43166	1247	0.608667	0
17	QLSQHEPKTPVAAAG	Q9Y2H9	727	0.576825	0
18	DNFNQQKKKFGGQDI	Q99250	1481	0.538476	0
19	TTSKFSYKIDFAEMK	Q9NR21	85	0.638819	0
20	ASTLREDKDVSKLTL	Q9NRJ4	393	0.506129	0
21	DVKTPASKPRPDQAR	Q96JG9	2563	0.595888	0
22	FCFRLRKKNQMSKLI	Q16666	372	0.565761	0
23	TAVNASEKTVVEALF	P57740	250	0.5407	0
24	VHCHRDFKEERPEEY	Q14241	642	0.567221	0
25	KNQYTNTKLEVKKIP	Q9P2N5	601	0.623245	0
26	KPGSPKVKEYVSKKA	Q9BVI0	906	0.589101	0
27	RNWTHHIKRLILENH	A1L390	390	0.621229	0
28	SSMDSEDKVTESIED	Q5VZL5	1026	0.572801	0
29	MMAKRELKKLKIEAR	Q9Y4I1	906	0.554852	0
30	VSDDGELKIDEFPIR	O75151	687	0.520548	0
31	EFKKSKDKCTFVTDS	O76041	64	0.548849	0
32	QGIQDPIKGGDVRDK	Q8IWX8	872	0.59213	0
33	VGVDGAEKKEDYNET	A8MW92	297	0.740346	0
34	QRTHTGEKPYQCKEC	Q6ZN57	184	0.622145	1
35	NAIAVRTKAMKCLSE	Q6KC79	1791	0.564924	0
36	SKYSSSIKVESLLTA	Q6NSI4	524	0.548857	0
37	AIFRVFNKYPTSKAV	Q8N3C0	1369	0.525743	0
38	PGHAVMRKWLLLNDP	Q9NZM1	298	0.570211	0
39	FLPKTDGKKMADTSS	Q8NFA0	1581	0.501579	0
40	TAQLQVQKAFSIDII	Q9UPN3	5715	0.648278	0
41	GKKVFRMKKEVQIKF	Q8TDI0	812	0.51631	0
42	DTKLGTDKCDNSSMS	Q99439	239	0.509671	0
43	MQVTVRSKERTPVDV	Q9UBF2	858	0.507204	0
44	KPATPKAKPGPSSQG	Q96JG9	3699	0.526401	0
45	GGALPPAKRAKKPEE	Q13428	261	0.56655	0
46	EGEASKEKEEVAEEA	O76070	115	0.506977	0
47	KIHLDFLKSDHPAVA	P16234	971	0.557083	0
48	EEKTEKKKTRKISQS	P21817	2838	0.556093	0
49	AYEQAKGKHIGFRSL	P20929	1830	0.603504	0
50	DSGLPWSKDWKGSKD	A1X283	486	0.577059	0
51	KLKDQTAKDKALQHM	P28347	115	0.558604	0
52	PGYPEAKKVAKEAAP	Q8IX06	65	0.538653	0
53	IKHLNLHKISKSVTT	Q9UKL3	1087	0.61475	0
55	QPLRDSRKYVNGSTY	Q6P2Q9	218	0.504695	0
56	TDSDNENKSDDENGR	Q9NT68	162	0.631412	0
57	YYKGFEDKVSIWERK	Q8NCM8	1324	0.657258	0
58	EGKPAEVKKMTAKSV	P27816	847	0.515403	0
59	FKGFEKVKDVQYIYT	Q99727	88	0.605971	0
61	RLDTSFQKCGEIYKN	Q8WXH0	541	0.543058	0
62	FLLKVPAKVESSFNV	Q8ND23	62	0.504154	0
63	TGLGQNKKESRSNAA	Q96M93	148	0.542618	0
64	TLNMGDKKYEDMEGE	Q99590	15	0.556108	0
65	KQRRRREKNSEKYGD	Q5BKZ1	299	0.595791	0
67	PNKALELKDRETLKA	Q9BXX2	669	0.556515	0
68	PPDQKAEKSPPPMDS	Q8IZQ8	277	0.529518	0
69	MIHIADTKVARRYGD	Q9Y262	534	0.529485	0
70	VEIIEQPKQRGMRFR	Q04206	28	0.507252	0
71	TVTCFLKKYNVVKKW	Q14690	1158	0.544627	0
73	RGDGTGGKSIYGERF	P23284	116	0.552002	0
74	LLETTVQKVARVKAP	O43290	657	0.544683	0
75	PPTFLSPKLTYIPEN	Q6V0I7	2055	0.553381	0
76	CPSTVSTKSQPGSSA	Q08AD1	682	0.597969	0
77	PRVLGRPKHKEVHLE	Q53EP0	684	0.548197	0
79	KELNYFAKALESPER	P00558	199	0.587562	0
80	EELMNFSKGEENLMD	P50990	270	0.591493	0
81	EKQIECQKMLISKLE	Q9P2N5	842	0.556677	0
82	VLQGLLKKRLLPAEH	Q8NF64	556	0.500215	0
82	VLQGLLKKRLLPAEH	Q9ULJ6	697	0.537686	0
83	SLFQAMKKGLILKDH	Q15149	4168	0.600446	0
85	MKVSAEIKNDLFSKS	Q9P0V3	402	0.729039	0
86	TPQRILLKIFNPVLN	Q6AHZ1	1146	0.543955	0
87	VQELIINKDPTLLDN	Q92797	65	0.523363	1
88	QIQSYCAKHLKCSQK	Q07954	1229	0.531885	0
89	DLQTRKEKDTPNENR	Q15022	416	0.576579	0
91	SSGQSGSKNEGDEER	Q9Y2I7	1187	0.511609	0
92	RPWNLGIKMKKKAKM	Q96RL7	1805	0.521682	0
93	EHLNLDDKELVKEQT	Q8NF91	4311	0.579734	0
94	LKYQLELKDDYIIRT	O75665	358	0.523476	0
95	EIPGIGYKTAKCLEA	Q9UNA4	270	0.608808	0
97	DITDGNPKLTLGLIW	Q9UPN3	167	0.505972	0
98	ENMKWAGKVWLFSNH	Q8N9V7	1685	0.556077	0
99	EEMLKAKKRVFPLSP	Q5VWN6	334	0.50344	0
100	IPSANPAKTMQGSEV	Q8WUM4	541	0.577412	0
101	GPREKMQKLGEGEGS	Q9Y5X3	108	0.510973	0
103	HSDLPPSKKGEQPGL	O60303	942	0.529139	0
104	GGGPRKRKLSSSSEP	Q9H4L7	209	0.542044	0
105	AEQTLRQKAQVEQEL	Q15149	2318	0.512815	0
106	EEIKENQKDLQVRFK	Q9NYU1	364	0.554601	0
107	STSVSSRKAENKYAG	Q15004	42	0.532403	0
110	PLPPQKKKPRPPPAL	Q01105	15	0.562927	0
111	FLLDSDGKRLICEVS	Q14667	171	0.594685	0
112	LQYIKQWKAFTKMAS	Q8WVM8	497	0.577164	0
113	EKPEEEVKKLKPKGT	Q6UX04	192	0.501947	0
	DEGQLEDKGSQEKQG	Q6IPX3	63	0.500006
	MMMQSGRKGADIMYT	P12235	245	0.500013
	LQEETGAKMSILGKG	Q5VWX1	98	0.500019
	EAAHFDEKKEINKRK	Q9Y6V7	407	0.500026
	PQPYGGSKRPLPFAP	Q9C0C2	94	0.500028
	STSEDAIKSILEQAR	O14529	694	0.500032
	YLSLMEDKNLLLMDK	Q92736	312	0.500037
	EFDENVHKPISLGCS	Q9HBD1	27	0.500038
	RHWCFKRKYLQGKRG	Q13435	509	0.500044
	HADSILEKYVTEIVM	Q14643	1486	0.500061
	AFQSMVKKTGDWKKH	Q8NF91	914	0.500061
	HAAAAIAKAGIPVYA	P23526	94	0.500067
	SSSVSKRKLQRNESE	A7KAX9	676	0.500069
	VPISNATKRSFLGSP	Q5T5Y3	369	0.50008
	KKSPTSLKRETYYLS	Q9NYZ3	143	0.500106
	FHIENKLKDLLAEKE	Q96L93	670	0.500109
	DTDDQSRKNMTSKNR	Q99504	280	0.500121
	RSRSRSPKRRSPSPR	Q9Y2W1	131	0.500133
	KDADSGDKKPTAKKK	Q86XJ1	670	0.500138
	SQIQVVCKQTLDALN	Q9H2G2	137	0.500138
	LQEAVPVKRGDTVAT	P22102	964	0.500141
	VMEPSHNKQEFLNVQ	Q86VD1	414	0.500142
	NPATPTSKLSLKTPE	Q32NC0	134	0.500144
	GIIPSSPKNAGYKNS	P48552	358	0.500145
	KLADKYKKKMWGWLW	Q15084	329	0.500145
	AGSLEVEKAKKATEY	P20929	2191	0.50016
	SKEATPAKEKHSDHR	Q92833	250	0.500165
	VEWEVKLKTHRQFSK	Q9BQF6	966	0.500169
	AKTKAKKKPRKRSDS	Q9P2D0	985	0.50017
	NGTKKSTKQEVAVFV	Q6P3W7	58	0.500172
	PSRKMTVKEQQEWKI	Q13573	240	0.500174
	GKAAQDIKDEEPGDL	Q9BTC0	247	0.500186
	SLEVVRAKRAGELLS	P20929	3408	0.500186
	VSNDLSQKLYATMEK	Q09472	1583	0.500191
	MPKIKMPKISMPGFK	Q09666	3157	0.500193
	HAALSLSKEHNPTQY	Q9H0C8	258	0.500194
	NSLQKEDKSPETGTA	Q8NFC6	2474	0.500194
	QKKQQDSKKLASLSI	Q86VH2	825	0.500198
	PCSEADLKRWEAIRE	Q8WWI1	670	0.500204
	KDELLSEKPEIKQKW	O00712	65	0.500207
	AKLKEIEKQHKNCEN	Q8IVG5	878	0.500213
	DEIDEFLKKLGTSLK	Q8NEZ4	4384	0.500231
	AEALYHSKYEELQVT	P35908	374	0.500237
	AVGYIMEKADLVIVG	Q14232	189	0.500239
	DNLFPEQKSSLNYLR	Q5VT97	1046	0.500257
	PSRPTSWKSEGSMST	Q9NWH9	884	0.500259
	NELEKQVKTLQESYN	Q03001	1519	0.500262
	SVKAPVTKVAASIGN	O00151	246	0.500274
	YQNFVDSKEVYRILN	Q03468	783	0.500276
	LIEEMEEKQKSDKAE	Q96L93	622	0.500288
	EHETQKLKELDEEHS	Q9H2G2	1165	0.500296
	KRRQHDVKLEKLKER	Q5VT06	281	0.500299
	SQIRQLGKALDDSRF	Q8NF91	8340	0.500304
	SYTSDLQKKKEEREE	Q8WWI1	758	0.500304
	KKRLLSWKQQVLKLL	Q5PRF9	524	0.50032
	KTSGNSFKVNSCKDH	P51587	275	0.50032
	GKEKGKYKEETIEKM	P61254	136	0.500322
	HGLEPLLKFSEWWHE	P28715	891	0.500326
	YLAMSWIKPQLQLYP	A0AVI2	1992	0.50033
	VLVVSNNKLVSIPEE	Q5VUJ6	190	0.500333
	EQLMEDKKRKKEDKK	Q9UPQ9	17	0.500339
	GTDLEKDKIGMEVKV	Q5SRN2	287	0.500348
	NSQKEKLKEELGLIL	Q99996	513	0.50036
	HSGGYPRKKISSLNP	P31629	153	0.500373
	VRGYLVRKQMRLQRK	Q8IZT6	1746	0.500374
	LLYDWSDKNTNIAQK	P15924	301	0.500382
	NVQLVSHKDVQDSLT	P52907	210	0.500385
	AKRLIGRKFNDPVVQ	P34931	79	0.500389
	SYTHKKEKLIRDVAH	Q03468	609	0.500399
	RLSMYIDKYCATESL	Q8WWZ7	716	0.5004
	SRSQSPKKDIARERR	Q99590	853	0.500401
	TQIRSKLKRTKQTAT	Q8IY92	91	0.500402
	EDMLELLKFDRKQLR	P29083	53	0.500403
	AQDYGVLKADEGISF	Q06830	120	0.500405
	RQLTKQQKSAVRRRL	Q9BVS4	514	0.50042
	KGSVTTLKSLVSTPA	Q96T58	2680	0.50042
	SNPVLPPKKIPKEFI	Q96M93	80	0.500423
	DDFILELKKDSDYVV	Q9UKN7	2866	0.500426
	PDPHRGAKVIRADPQ	Q9Y4H2	1134	0.500426
	PPDSDDNKTKKLCVI	Q27J81	1241	0.500432
	DLDFAKAKQLTVVGC	Q6R327	599	0.500436
	LRVLEDGKQQVQVVG	Q99661	426	0.500437
	GDLNNPPKKFRDCLF	Q14643	51	0.500443
	AKRKDLIKKSLLQLI	P49917	168	0.500451
	SNFKSPVKTIRAAAA	P67870	212	0.500461
	EKERQTEKRVLETEL	Q9P2K8	1475	0.500472
	KLEKKDAKEIPSATQ	Q9BQG0	1155	0.500474
	WDEKAVDKLKEKKER	Q14683	673	0.500482
	NFLNRYEKIVKKIRG	O75116	77	0.500492
	SKSRSSSKSGHRKRA	P30414	556	0.500495
	PGASPRKKPRKQQHV	Q9H0E3	835	0.500499
	TAVERSRKTLEAREK	Q9NW82	56	0.500499
	GEEEKVAKRKAAVLS	Q96ST2	391	0.500502
	VTEFEDIKSGYRIDF	P0DME0	142	0.50051
	IGYQADIKGSSQPAS	Q8WUY3	2178	0.500537
	IMAFSVNKANCNEIV	Q8TDJ6	2670	0.500538
	ICRIVDWKEDCNFAL	Q8IYB7	309	0.500549
	WKVPGSDKLPSVLKP	Q86UL8	1441	0.50055
	IIYLDREKRVFTEAN	Q9NU22	2642	0.500557
	FKHKNVNKRKEPKKK	Q13601	253	0.500568
	KRESVVLKGQEAQVE	Q5SRN2	407	0.500576
	PEDHLLQKGASNTQL	A6H8Y1	1721	0.500577
	KCHPDQTKHLDFLKE	Q5K651	426	0.500579
	FASLVQNKTTSDLSK	Q9Y4C1	918	0.50058
	VQKVALCKYTAQMVV	Q15334	524	0.500582
	KSYLKCHKRSHTGEK	Q9BUG6	431	0.500582
	ALQEASNKDAEALAA	O95347	368	0.500589
	LQEIKRGKRMKCTLC	Q8IWS0	276	0.500596
	GQSTPTQKGVGIAGA	Q9HCG7	384	0.500599
	LDKLRKMKWEQMWRL	O95461	311	0.500611
	LHIYMLMKKDSYPRF	O94810	401	0.500613
	SDSSPDSKAKTRTPL	Q9UQ35	1566	0.500621
	RLSVDYGKKSKLEFS	P68366	163	0.500622
	ELSAKKRKKSSSEAL	P42568	299	0.500631
	SGGSLQPKKKREEPT	Q9UJA5	77	0.500635
	CKGKNLKKPAPKSYL	O95425	2098	0.500636
	KEKMAREKLEEIDWV	Q7L590	288	0.500649
	ILKKKKSKDHFGLEG	Q9Y490	406	0.500659
	SGRPIRKKTEEEEKL	O75420	881	0.50066
	VKTLYHLKSEFQAII	P20585	649	0.500671
	SGHRDIVKLLLRHGG	Q6UB98	268	0.500678
	REMEKERKQEKEKEL	Q9Y520	560	0.500679
	QPTTKRRKRKNSTSS	O43679	259	0.500682
	VTAYRGKKRQEAPPH	Q9Y623	147	0.500686
	WRLTPPAKVGGLDFS	Q08050	631	0.500688
	KFKDGAEKEKGDPVK	Q6UB99	1540	0.500688
	NQGEAITKGLRHVTD	P40123	275	0.500688
	GRIKQKMKELASLHD	O14662	97	0.500689
	EYAIGYFKKQGFSKE	Q92831	618	0.500698
	ESEDNFAKELQQYIQ	Q8N5P1	92	0.500699
	SMMGRLGKVEKQVLS	O43526	625	0.500701
	NMKLLQTKYDADINL	Q8N8E3	483	0.500706
	ELAGTQQKLQRSEQA	Q9H0B6	119	0.500708
	FYQLLEEKCCGKLDH	Q8ND04	640	0.500714
	GERPFKCKICGRAFT	Q9BXA9	710	0.500719
	DSVEALIKKHEDFDK	Q13813	1485	0.500722
	ILHANDPKWSTPTKD	P51587	3190	0.500728
	IGVPETPKETPTPQR	Q12830	1978	0.50073
	IQVCAKQKLARHGSF	Q96AV8	404	0.500731
	RKFGAQFKLQPSSSP	Q8WWM7	553	0.500736
	DPAQITMKVIQGLYS	P23921	42	0.500742
	PELTDKHKLADICKN	Q9Y2L1	809	0.500745
	DTQELIFKDKSRVDL	O60287	1627	0.500745
	GSIKRGSKDNATDSV	Q07954	2125	0.500752
	EAEQRFRKKRRRSQR	Q86V40	421	0.500763
	ISRPLEGKKSLSLSA	Q76FK4	679	0.500769
	QDTELQEKETPTQVY	Q5SW79	680	0.500792
	GLTHNLLKKQNSSPN	Q460N5	623	0.500799
	RSTIQLIKLKNPDDL	Q6ZMT9	712	0.500813
	GKSSSYLKKCRRRSA	Q69YH5	85	0.500814
	WEVKPKQKWKPFSQK	Q709C8	3126	0.500817
	KELMELLKSRDYERE	Q9NRZ9	776	0.500818
	DESERGMKVIENRAL	P06753	129	0.500819
	YDEAFYQKLLDLSTE	Q9H8X2	372	0.50082
	NLLRILNKLTKWKHS	Q5VSL9	677	0.500832
	RYDTPTSKKKVRIKD	Q9BYW2	2105	0.500834
	LLLKFEIKEVILEFT	Q709C8	918	0.500835
	QAKRYAEKRKFGFVD	Q6P2Q9	48	0.500839
	MDLFEAWKKEYKLLH	Q149N8	1332	0.50084
	LQDPASDKLLGPAGL	O95359	1496	0.500841
	VLDACDGKFQAIDFI	Q8NDM7	389	0.500842
	KKAIDGGKNTSGLPA	Q8IWI9	2949	0.500846
	KPGVTKEKRIKYAKE	P30876	334	0.50085
	LIVDQVQKLTSLDIP	P54132	726	0.500861
	EYQERVKKLEEVERK	Q14152	850	0.500869
	EPGKLSQKIKVWLQE	Q7Z4N2	890	0.500873
	PINGSRFKCRNCDDF	O95714	2722	0.500875
	AYREKIEKELEAVCQ	P61981	91	0.50088
	TQIDDRNKLTEHFII	Q8WVM7	566	0.500886
	GHIQVNDKIVAVDGV	Q8NI35	417	0.500889
	LYLDGSEKCRPLEEN	P49792	2695	0.500894
	KKKKKKKKKAENAEG	P51532	587	0.500899
	SAVLRRHKKMHCKAG	Q6ZSB9	582	0.50091
	AIEDMQKKTRELAFA	Q96HP0	1912	0.500913
	EIEANDKKPFPEDLK	P40189	702	0.500926
	QHQKALPKKGVLGKS	Q9BQG0	1283	0.500928
	SGEINPVKVSNLVRA	Q9H7N4	1262	0.500934
	KEEIRFLKEAIPKLE	Q96LZ7	97	0.500934
	TDGSSQIKQEPDPTW	P78347	991	0.500935
	RIYTTKIKPRLKSED	Q09666	130	0.500939
	MELESNSKRMESRLT	O43827	89	0.500948
	PSEVDVEKLAKGYQS	Q3ZLR7	310	0.500954
	PSFQLFEKGDVNGEK	O75715	137	0.50096
	SEEEPPKKTAKREKP	P35659	258	0.500966
	EEEAARQKLQLEKVT	P35749	968	0.500967
	KGRSQTSKLPPRFAK	Q9Y520	1724	0.500973
	RPIHESIKTLKQHKY	Q5VSL9	468	0.500974
	MACGATLKRPMEFEA	Q9H9L7	8	0.500976
	LKVVVDSKEKEKSDD	Q7Z2T5	332	0.500976
	HDNKDICKSDAGNLN	P49792	1336	0.500979
	ASYHEVNKMTCQNLA	Q5VT97	972	0.500981
	TPQTPDIKVSLLGPV	Q9H0H5	571	0.500982
	AVQVQRRKKVTFEKQ	Q9UJA5	43	0.500982
	GVKGYEEKLNGNLRP	Q8WXI9	78	0.500984
	TARAKVEKLRSDLSR	P12883	1134	0.500984
	THFTVYTKGAGKAPL	O75369	873	0.500988
	LAAVYRQKIEDNSQG	Q96AV8	455	0.500995
	ILKSDAAKPLLGHDA	Q08AD1	95	0.500996
	TTEQKQEKKRLKISK	Q01780	796	0.500998
	KCLAGQPKDTMRLDE	P21359	99	0.501
	TIYIPYLKMLQGLAN	Q92621	515	0.501
	LASLPDSKFICMECK	Q9BZ95	739	0.501
	VNGDAALKDRETDIL	Q68CZ2	471	0.501006
	RPRSSRSKSRSPSPK	Q16629	212	0.501007
	RSLDREEKPFYTLRA	P55289	122	0.501007
	DGLNQAKKGGVSCGT	Q7Z5K2	339	0.501007
	FLTNDQTKVAEEENK	A6NKT7	1215	0.50101
	TEEQEDDKQMTLMLL	Q9NU22	3860	0.501013
	KGRGAKRKQQDGGTT	Q9UBL3	301	0.501017
	GFSGAGEKLFSSQYG	A6NKT7	1002	0.501023
	GVNSKVQKLMNTTFS	A6NI28	427	0.501024
	LALTFKKKTENKLHV	Q6ZNL6	664	0.501025
	QLELEKKKKQDLDDE	O60870	159	0.501027
	DVDIKGPKVDISAPD	Q09666	1363	0.501027
	ALGAQIEKTTNREAC	Q6IQ49	94	0.501029
	VQQQYAYKQRRDKLY	Q9BRP0	207	0.501033
	HNLSKIMKLDNEIKA	Q92878	267	0.501042
	AVKKKPQKVAGGAAP	Q14978	496	0.501044
	PLTRSHLKSESSDES	Q9H7Z3	62	0.501048
	LRNREASKGFHDKDS	O15523	50	0.501051
	WTIEEYDKHSLHTNL	P59773	119	0.501056
	HHFLQVLKDREIRDI	Q66K74	145	0.501057
	PPPYRRRKRPSSARR	Q9UIS9	407	0.501066
	TGFKIPKKNILLTIG	P27708	1313	0.501072
	SHVQAMHKRKEFLDY	Q7Z333	2082	0.501078
	TSSHSLQKYYITGEA	P03372	581	0.501081
	EELRQTVKQLKEQLA	Q14980	1088	0.501087
	RETRKNAKIISSRDD	Q5T2T1	502	0.501087
	MRVGLVAKGLLLKGD	Q12906	100	0.50109
	RSIQTGTKQFGMCVS	Q17RB8	604	0.501096
	VNGGNNAKRVAVPNG	Q9UPQ9	71	0.501107
	SPSSDPIKACRPIKP	Q8WZ42	18723	0.501109
	RSARLSAKPPAKVEA	P05114	27	0.50111
	IMTEMLKKFLSFMNL	Q7Z5K2	1161	0.501115
	LLIAKPNKVQLIAMD	Q99250	1836	0.501121
	PYSTIDQKLLVDIHV	Q7Z2Y5	864	0.501131
	EESEETLKNTKEIQR	O95347	760	0.501137
	YAIYNEDKLMAKALL	A5A3E0	252	0.501148
	KAQILNGKLDLAADK	Q8WXX0	728	0.501152
	LRATCTAKVKAGSVK	O75155	1161	0.501153
	KEVVPEKKVPVPPPK	Q8WZ42	11548	0.501155
	LLKDIIYKVKTVFNN	Q8NDM7	1018	0.501156
	AFTGIKGKEGSALTE	Q9Y2J2	892	0.501179
	VGDEAQSKRGILTLK	P60709	61	0.50118
	NKYLTVNKRLPALLE	Q14571	136	0.501182
	PLDEFLQKTDPKDPA	Q93009	439	0.501188
	FPEQIAEKLFSAAEA	Q9Y546	117	0.501197
	DANVLKYKSLQAEET	Q8NEM8	957	0.501208
	SCSPRFSKVYSSMEQ	Q9Y2H9	713	0.501211
	QPPENLAKGQPSTPV	O15069	1214	0.501235
	WETVPSMKGDPVNYI	Q53EP0	1081	0.501238
	LKCHNQVKRHLCTFC	Q9BRP0	145	0.501247
	KGAWEGTKAYGYTLD	P20929	4467	0.501255
	TSSVVEGKELPTRSS	Q92736	4531	0.501257
	AESEGDEKPKLRRPC	Q3L8U1	1477	0.50126
	RWKTLNKKVAQRAAQ	Q03001	5379	0.501262
	KDDLIPCKEAGIRFR	O14936	634	0.501271
	CNVESNRKKETELLG	Q9NSV4	1165	0.501272
	NFKPERVKPRSLSEA	O60673	1492	0.501278
	PQSPLDDKKDNLDPE	Q5RHP9	534	0.501283
	ITKPVLGKDEDFKQY	P07814	637	0.501287
	GVEVKNAKSEEEQTS	B7ZW38	219	0.501288
	MTSFAERKKQLVKAE	Q9P1Y5	571	0.501289
	KYDAKCTKPDCPFTH	Q6PJT7	649	0.501295
	QTGMRGTKPNQVVCV	O95359	384	0.5013
	EDFEKEIKGRSSLDL	O76041	384	0.501307
	AIPLPLVKSLLGPYL	Q9H0A0	399	0.501315
	HKENELSKKHMVQFL	Q8IVG5	1225	0.501319
	GATTVRYKGRNLRIK	Q96RY5	283	0.501326
	IVREQGLKGTYQGLT	P53007	178	0.501329
	ENTFEGHKSKNKEDC	Q6P0N0	707	0.501338
	IDYYNLTKFYGTVKL	P25092	546	0.501342
	KSLGSLPKVEETDME	Q14241	416	0.501356
	KTQKPPQKPAPAVVS	Q96CB8	229	0.501366
	YKDYHTLKVYECELE	A0AVI2	1412	0.501368
	LSGPFVQKWNGKMLN	P22102	906	0.501369
	YKQKLGHKTQEGIMV	Q5VT97	462	0.501381
	QLLKALEKDAKNLQK	Q9UPN3	3451	0.501384
	EMMETDEKEGLRCQI	Q86W92	67	0.501398
	DCDNHLSKGIIHLVT	A4D1E1	1028	0.501404
	YHTPSDSKEITLTVT	Q7Z333	2516	0.501406
	SPIELDAKKSPLALL	Q9H7S9	85	0.501407
	PSPTTASKEGDLGGK	P58397	1058	0.501409
	IPAKSPEKCRLDMIP	Q9NZM1	1918	0.501412
	VQSLAGHKSPVTAVS	Q99698	3658	0.501415
	RERRELEKLYQERKM	O75665	914	0.501432
	TRQVAKCKCAKRFQV	Q03001	7290	0.501433
	GVLVTVGKLDLGSGP	Q9NYQ8	1511	0.501443
	VQLLSGDKAPEGRLR	Q9BYK8	1181	0.501447
	RTLSEAGKSTSIQSF	P13797	537	0.501448
	IKKKPLLKEVEQPRP	Q9UPP1	937	0.501451
	YCKIIDSKETWIPFN	O94830	53	0.501452
	SQSSSFSKIHKRPHR	Q9H582	676	0.501455
	AKMVEAAKGAAAHPD	Q9Y490	875	0.501461
	EYAQEAVKKGSTAVG	Q8TAA3	29	0.501477
	NESKVNKKLRQKVNR	Q562F6	711	0.501489
	QEKEKIDKCKKQIQG	Q9P2K8	335	0.501491
	YMYELKNKGRWVHWN	Q6ZR08	1839	0.501493
	GLISTLKKKTNKFIY	P51587	585	0.501498
	GKEESSEKFRQVEKS	Q1MSJ5	196	0.5015
	VPNTSSRKKNITSKT	O43314	1223	0.501511
	VSGGTPIKIEDPNQF	Q9UEY8	484	0.501514
	VEILYNPKTKKHLGI	Q9UPS6	139	0.501516
	KFPLGQIKLWEAKVE	Q8IVE3	854	0.501523
	EQRPKRVKPFMTGAA	Q56UQ5	117	0.501525
	ESVADYFKQIGIIKT	P35637	306	0.501525
	YQILSNKKPELLDML	P12883	294	0.50153
	LYIIETQKVLDLKIN	Q96RL7	643	0.501542
	FIIENESKGQRKVLA	Q8N3D4	107	0.501544
	NLRPMPKKYHSEVQR	Q8NCX0	1093	0.501544
	CSLTQQNKSTVDVAF	Q9Y485	688	0.501545
	EKRICLPKFQEKSPN	Q8NDH2	1544	0.501548
	LLRATDGKKKISTVV	P37108	64	0.501548
	NIKLLAAKVPSGGQE	P46939	1195	0.501558
	MDASAKFKELGIQPV	O95714	1755	0.50156
	QTPICTDKPTTHEKT	P46013	2209	0.501564
	STDATPFKVLTGGES	Q9P2P1	1759	0.501577
	HSDLAEAKKKKLAVG	P46940	672	0.50158
	FDQDMANKIGEHMEE	Q16881	385	0.50159
	TLTHETFKALKPGLS	O75354	136	0.501591
	MFTFEIEKDTFALKP	A2RTX5	482	0.5016
	EDTTELRKKLSQLQV	Q9P2N5	924	0.501601
	SQDAPTVKESCKTSS	O60934	404	0.501606
	TKFFQSTKLDWVEVG	Q6P2Q9	486	0.501608
	YNKVPVSKILGKCVV	Q86U86	1030	0.501614
	SRFRYSGKVAKEVVE	A2A2Y4	336	0.501616
	HIAFLTIKGAGHMVP	P10619	453	0.501617
	TGQYEREKAGFSWIE	Q14624	777	0.501622
	KVTSLKFKEKPTDLE	P21359	478	0.501626
	ILNSQSSKETSALEA	Q14746	153	0.501626
	VMMNHVYKERFPKAT	Q9Y2H9	183	0.501628
	GNSIFNFKEVEVQLL	Q14667	786	0.501631
	WFHRNPLKATAPVSF	Q5VW32	11	0.501633
	LPSDFIPKAGALALP	Q8TF72	1963	0.501635
	IVITKKIKVGEFFSH	Q9NTJ5	80	0.501636
	LPSGGQYKIQIFEKG	P22914	95	0.501639
	KWTEILTKRMTNGRR	Q15361	747	0.50164
	LYKEERKKKSKDRPS	Q6UB99	767	0.501641
	PPEGKDAKERILTDH	Q5UIP0	1060	0.501645
	SEVVNVLKSLLSNLD	Q8WUM4	553	0.501646
	LDYPLGDKLRPNLEF	O75691	2280	0.501649
	QPLEFVHKIGASVRK	Q9HCK1	154	0.501649
	TLTENLLKKEQDYTK	Q15075	313	0.50165
	DKEKDSEKEKDLKEE	P29144	1013	0.501657
	RAGIEDSKKWGMLFL	Q5JVF3	164	0.501659
	SRPTLPVKSLAQREA	Q7Z422	86	0.501662
	ATKKEEEKKGSDRNT	P29536	191	0.501664
	GGVSKPRKPPMVMTP	Q9Y6X0	499	0.501673
	FGNIHYGKVIHSGKT	Q9H7T0	576	0.501679
	VFKSTEQKYLTLNTE	P06276	527	0.501681
	LRLSKLTKEDEQQQA	P49916	389	0.501684
	ADKDVTAKDSRFKMP	Q8IVF2	1159	0.501689
	KSLQNAQKHYKKRKG	Q14683	324	0.501704
	LTKTEASKSISRQSE	P12757	432	0.501704
	NDENQKQKAELLAQE	Q9UL16	326	0.501706
	FNGRDLNKSINPDEA	P34931	363	0.501707
	ELKMQLAKKEEELQA	P35749	1087	0.501712
	KHMLQIWKSCYNLTN	Q86TV6	614	0.50172
	WFTKLYCKDLRLGSE	Q8ND23	223	0.501732
	PLENNYLKNVVKQIY	Q8NG31	2324	0.501733
	HSSIESDKIVEIINE	Q86VY4	364	0.501738
	RSKSMNVKHSATSTM	Q8IVL0	340	0.501744
	PHLKSLLKKEVKSSK	Q8NFC6	718	0.501746
	DQLFTNFKERTERLV	Q6XZF7	1096	0.501755
	WANHYLAKSGHKRLI	Q8IVL1	101	0.501758
	DAHNDIFKSIDGNRQ	P46939	2507	0.501766
	DDIKNIYKRMTGSEF	P50395	422	0.50177
	RQEYMRRKQLKLMED	Q08AD1	1240	0.501774
	GGIPGSKKWFFAVQA	Q96DY7	78	0.501775
	VFIEMTLKEEQEEYK	Q9UBC5	414	0.501778
	RAVDLIQKHKSIEEI	P39748	252	0.501781
	TITNIQPKESGGGVG	Q96JB1	4207	0.501782
	FCDQQLRKEEENASV	P78527	3426	0.501782
	ESENSCNKEEEPVFT	Q9Y520	622	0.501791
	PATRPKPKKARAAEE	O15417	2438	0.501793
	DKTLLKEKRKRREEL	Q9UMY1	97	0.501795
	LGWKPPAKDGGSPIK	Q8WZ42	16657	0.501805
	RALKQQKKAQIRANG	Q13285	110	0.501805
	QLAEVEEKIDQLHQE	O60749	373	0.501806
	LIFEDKPKPSKQSLQ	Q1MSJ5	623	0.501817
	QQLFYQWKCKRFRDQ	Q9UBC5	828	0.501827
	NIKSMWEKGNVFSSP	Q05682	718	0.501829
	VCLTMSEKGFQQISF	P11388	306	0.501837
	DDFASKTKDRIREKA	Q9BRR8	121	0.501838
	LEQKEKEKEEDTSGN	Q12888	146	0.501846
	EDICDKTKKQAVGSP	Q149N8	524	0.501847
	QKDDINKKAFDKFKK	Q99543	520	0.501861
	RETCDHGKGKKSSLA	Q8TED9	373	0.501869
	QQKILKIKTEEIAAF	Q2M1P5	880	0.501871
	GTSEFLNKMTEAQED	P14625	177	0.501891
	TTGYMAAKKHLEINP	Q58FG1	319	0.501891
	HTNFHIPKKGPPAKK	Q9UIG0	386	0.5019
	DKRKTPLKVLEEWKT	Q9NRI5	747	0.501908
	PAGEKGNKGSKGEPG	Q01955	1411	0.501909
	PHTRSPAKNKKTLGR	Q5VV41	194	0.501915
	KDFHPASKSNIKKVW	Q86X95	19	0.501926
	RYFRRRLKEMGFIIY	O15270	454	0.501926
	GPQSISIKDISFHLQ	Q8N5C7	150	0.501928
	VSSEMKNKVWNVSLK	Q9C029	310	0.501931
	QLRKHDHKTNKKDGL	Q8IW52	674	0.501932
	TATNRPGKNLKAFVP	Q8IWI9	1516	0.501932
	GDISEPKKKEYEGGL	Q8IVW4	375	0.501952
	IPVKQYPKFNFVGKL	Q5VWX1	73	0.501958
	EAVNEVYKNLIPILE	Q96HP0	1708	0.50196
	TQEQLDEKSSQLDEV	Q9C099	861	0.501963
	ENHNNNKKDHSDSDD	Q9NW75	112	0.501973
	AAGRVIGKGGKTVNE	Q9NZI8	505	0.501984
	KKLESLLKESQIRDK	Q4KWH8	500	0.501988
	CEKLKTEKEPDATPP	P28715	333	0.501989
	KIHHSGAKVVLSKLP	Q99832	287	0.501992
	DHGGTVKKPQLNNKP	Q96ST3	410	0.501993
	RKYNWSAKAKRRNTT	P61927	52	0.501997
	RRSGPPSKSGKRGPF	Q9Y520	1581	0.501997
	PFVENTKKLLRFNPL	P24462	209	0.502018
	STSSQESKTTNVRQT	Q6PJT7	139	0.50202
	LIESTTQKIKREEQS	Q460N5	459	0.502021
	QFSVALTKSGAVYTW	O95714	4214	0.502024
	KPKATPVKKAKKKLA	P07305	144	0.502026
	TKGLPSKKGIVQSIV	Q9H9A5	418	0.502027
	NLNSLFEKYVPYLMD	Q8IVF4	2283	0.502029
	FHQAAKLKGIGEYVN	Q92620	1085	0.502037
	QSGAQQTKKDKDKKN	Q9NVA2	418	0.50204
	YEAQRKSKSPKINLN	Q9BXX2	1241	0.502041
	ALVRCNMKMELEQAN	Q9Y232	560	0.502077
	DDLNMPAKDMFGSQP	Q9P225	2490	0.502082
	QNLDTKSKLRPKRAS	Q9Y4K1	778	0.502083
	QKNKKPEKSSSSESS	Q9BRR8	893	0.502084
	LSSMHLEKNHQQIYG	Q6Q759	1629	0.502091
	DNKIKKLKLHAKAKL	Q14789	97	0.502093
	VEKSINRKRLWNFTE	Q5SWX8	122	0.502103
	LLFREMEKSFDEQNV	O95425	706	0.502104
	ENPTKSCKSRGSNLR	P18621	16	0.502116
	LNAINRRKQVLQQPG	Q8N8V4	403	0.50212
	KLKQQVKKMEEWKQQ	Q15643	1220	0.502127
	EGVEEKKKEVPAVPE	P18124	9	0.502127
	DWKKTIAKGYDLRPD	P20929	1550	0.502127
	MNGAGFQKGLTCESC	O94776	363	0.502129
	HLKPATEKLIVVNQN	Q03164	3077	0.502136
	HLPHHVLKSIASAIV	Q9NR09	229	0.502142
	EEMKSGLKDFKTFLT	A6NKT7	1203	0.50215
	PLGSSELKKIKQDIY	Q15051	47	0.50215
	LTPITGAKPSATGYL	M0QXA7	660	0.502152
	LSVYKKPKQRKSIFD	Q8TDM6	968	0.502155
	YIPPKGEKKKKFKDP	P23497	759	0.502162
	EQEGESVKASQEPSP	Q96CP2	15	0.502168
	AEYEAEKKGLTMRFN	P46100	2283	0.502168
	GQYVLTLKNVAGTRS	Q8WZ42	26792	0.502172
	ATNSDVRKEVTNVIS	Q15746	273	0.502176
	MVTFKASKRAEVTRG	Q4AC94	1471	0.502182
	DENRPIMKSLTLPAL	Q2M1Z3	234	0.50219
	LDSSLRGKQRMSKHN	Q9H3S7	1597	0.502204
	HALPGARKPHTVVVQ	Q9UPA5	1859	0.502206
	RVSTSGQKEERKVGQ	Q3ZLR7	270	0.502208
	WILTRNYKALSKGSK	O14646	735	0.502208
	LYLKEVTKFLALVCI	Q9HB90	333	0.502209
	LLSVKQEKEIQMKMI	Q8NF91	3333	0.502212
	LVKDMKIKSLEEIYL	P15880	76	0.502216
	RTIEKFEKEAAEMGK	P68104	44	0.502218
	DQAQSAYKKAAELEP	Q6PGP7	64	0.502227
	QIFEPLHKSLDPSNL	Q9NTI5	753	0.502234
	KTKDLKKKWLEQFEM	Q9UKW4	492	0.502238
	SRPPPTGKMPGAPET	O75116	9	0.502263
	DEPKFMSKVIGANKN	Q9Y2W1	455	0.502269
	AAVMSSSKVTTVLRP	Q9H0E3	244	0.502288
	TTLDNFSKEFVSFSD	Q8WXH0	2270	0.502291
	KIFKAAVKLLHEKGK	Q9ULI1	216	0.502299
	GKELSDKKNEEKDLF	Q96ST2	452	0.502303
	DFTCAFTKAVAEAPF	Q96AY2	441	0.502306
	DYQTQETKSSLSKTL	O43572	119	0.502318
	KLKEKYEKDVADYKS	O15347	155	0.502323
	LFGTSGQKTKIISNR	P00533	487	0.502327
	SKQGESEKHIFTETI	Q96JB1	85	0.502329
	TELKASQKPIRKHRN	P11171	202	0.502331
	IPQKQEKKPRKIMLN	Q03468	259	0.502332
	VESDDLKKDLPLMPP	Q2LD37	1985	0.502337
	KPQSLHAKGAEIEVD	O60284	602	0.502343
	KRKNKIPKHVKKRKE	Q9BRS2	552	0.502344
	IVGRKIGKIRSSAFL	Q5THK1	1543	0.502345
	YTFKTPEKEPPLWYA	A6NKT7	1641	0.502347
	QEEKVEEKEEDKAEK	O75376	517	0.502348
	LYMTRIQKERFGSTQ	P27708	2149	0.50236
	PQPGAATKPWRSKSL	Q8IVL1	379	0.502361
	MDHKPEWKGRINQKD	O15050	231	0.502366
	RFFDELTKEKDQIEA	Q99550	1123	0.502373
	EVIIELTKGGVDFAL	P08319	265	0.502374
	DLSNASVKTTAKDIQ	Q8NF91	4105	0.502375
	VIEKFYPKRYRDGCS	Q8IVE3	1302	0.502378
	EKALASEKSPTADAK	O00515	271	0.502382
	SVCKLQQKVQNSKMS	Q8IYX8	394	0.502384
	QKRVKEEKMYGQIVE	P31629	1464	0.502388
	KYHKVVKKGKAKKAL	Q9BVJ6	258	0.502402
	LCNQCRGKKAKNPKE	Q6V0I7	4532	0.502402
	AGKSKPSKPSEPMLA	Q8WZ42	22273	0.502407
	AMVFMGAKGSTAAQM	P50452	47	0.502414
	PVKGVFDKETSLNKA	Q6P4R8	556	0.502422
	LERRAKQKANQQRQQ	Q6Y7W6	1199	0.50243
	KREARLDKVLSDMKR	Q9BTK6	203	0.50244
	VRIHTGEKPYECKEC	Q147U1	420	0.502441
	QRLDTPRKLRFPGRF	Q96HP0	957	0.50245
	VEEEGIPKETDIEII	Q9H095	39	0.502454
	YPQKPMVKTKTIELI	Q9NW08	721	0.502457
	DQNASSSKESASVKE	Q9BX84	792	0.502458
	SDAMRTLKSEVKDEI	Q7Z7A1	2161	0.502471
	KRSMSNWKLSKALSL	Q13237	425	0.502474
	FFVRLVGKTPIETLI	P24468	389	0.502476
	PEVSQTDKGKTEKRE	Q6P3S1	698	0.502483
	LAGDKPHKCPECGKG	Q96MX3	452	0.502486
	AAAAAMPKTISVRVT	P26038	3	0.50249
	YPICRPLKKTWEDIE	Q15047	318	0.5025
	LSPAKGQKPALDCSQ	P18858	82	0.502508
	VEQVQSGKLIPFSPA	O95425	867	0.50251
	LTEDVIRKLMTPIEC	Q9P2D3	636	0.50252
	DYQTTVVKYSKAIAV	Q9Y4G6	1860	0.502525
	AQDITVVKSMKSPPA	Q8WXX0	2695	0.502527
	EDKDVKTKKDDSHSA	Q9H1E3	69	0.502531
	KLFQGVNKAQDGFTQ	Q6Y7W6	1130	0.502538
	MENLWGIKSINDYNT	Q709C8	2242	0.50254
	GNQLRCPKCGDLCTH	O76031	107	0.502541
	KTVVRQNKNHYLLEY	Q9P0V3	670	0.50255
	ESGINYDKPLPPIQV	Q96L91	2507	0.502557
	VGVSVIVKNVRNIDS	Q9HCE3	66	0.502558
	IKTILLSKEIFDFSP	Q8WXH0	3916	0.50256
	DKGDVIKKLALKLST	Q96RL7	1038	0.50256
	RMCCPGMKVSCQLQV	Q38SD2	1583	0.502561
	RESHFLQKLYSLSLL	O15037	500	0.502562
	FSLPSFHKFCKGLLA	Q96Q15	759	0.502562
	KVLNTSLKEKFNGKK	Q16666	250	0.502566
	PSVCEKIKLTIYDWD	Q9NZM1	439	0.502577
	DIIPFIDKYWECMTT	Q9UBL3	203	0.502581
	VEGVLPSKQEPENDQ	Q9BTC0	216	0.502584
	PDKPASPKFIVTLDG	Q6PJT7	517	0.502586
	EILDTALKEIDEVGD	O15270	526	0.502586
	DMLQLASKYKDLEHK	Q9UKU9	175	0.502598
	KGKDEYFKNMTPKVD	Q03001	2773	0.5026
	DFSKITGKPIKLTQV	P36955	349	0.502602
	ETSLELRKIGVRLNS	Q6ZN16	425	0.502609
	LEEVERKKRQRELEI	Q14152	858	0.502621
	SHLLSIHKVYEAVEL	Q8TEQ6	990	0.502626
	ENNSEILKKLTAEIN	Q8NDG6	927	0.50263
	PEVTEPRKDPQGARG	O95359	82	0.502632
	LNNELQKKQKAYNKI	O15078	1829	0.502635
	WHKEVLSKFGQMLGS	Q14204	1130	0.502642
	EMSSVGSKGDFLLVS	Q9UBC5	966	0.502643
	ESIKAQTKVRKKVMG	O43795	377	0.502644
	KLHARDLKKELITCP	O60284	718	0.502644
	SKMMQCGKCDRWVHS	Q03164	1590	0.502657
	NQTTLDKKRLTLCWQ	Q2WGJ9	662	0.502658
	QKLSSTTKSADQLNG	P0DJD0	1648	0.502665
	PLRRGNRKQELAVAL	Q9BYK8	518	0.502666
	FHKICWKKFKNLKYP	Q86Y13	294	0.502674
	YSEGYPGKRYYGGAE	P34897	103	0.50268
	LITTQATKAGFSGGM	O43709	180	0.502681
	TQKRITKKNPKKAEK	Q5H9U9	1167	0.502683
	LPLINVQKLKAKLSS	P28328	215	0.502685
	THLLEREKRINLFQQ	Q2NKX8	518	0.502686
	KEKKKHKKHKKHKKH	Q7Z6E9	1740	0.50269
	LKSHKENKVEEIPDS	Q96QE3	278	0.502696
	REARSGIKEEKSRGF	Q9H0G5	210	0.502705
	EMAAETSKWLMGEGL	Q96ST3	1232	0.50271
	DAYPQRIKFESLEIK	O75665	192	0.502727
	ILDLMTEKELRVRLP	Q9H7Z3	1147	0.502729
	LEDIESVKKKNDNLL	P0CG39	647	0.502737
	RQEELERKRREERIR	Q9UL16	249	0.502745
	TGTVKSIKPTHVVVT	Q14690	1047	0.502749
	MAVAARKKLEMDLKD	P35579	1614	0.502749
	IISLKSDKKRKLEAK	Q9H0A0	992	0.50275
	LGGNLNMKSRLEFTK	Q8NCM8	2203	0.502754
	NEQKVKQKAADLLEM	Q8NDM7	1390	0.502758
	IVVLGVEKKSVAKLQ	O14818	47	0.502772
	RRRTRCRKCEACLRT	Q8NHM5	615	0.502777
	RPQNKMKKSPVGSWR	A7KAX9	654	0.502781
	APVPPFEKQGEKDKE	Q9Y4A5	529	0.502786
	LKKYCNPKKIQGLEL	Q7Z7A4	255	0.502788
	VSSRELVKKVSDVIW	O00255	119	0.502798
	YFAVYTFKARNPNEL	Q6XZF7	1525	0.502803
	TFMEVLTKILQQGTE	P21359	1185	0.502818
	TFTFSLQKKFESLFP	Q13045	1006	0.502828
	EMASNKFKRILNREL	Q08493	238	0.502844
	SLPGTTAKSGSAPIL	Q96TA1	145	0.502849
	HPDVTYVKKVRTLRM	P04920	1156	0.502855
	SQPAYPEKLRHKKDS	Q9Y2H5	584	0.502857
	QLLQDVLKIKPDVKQ	Q6AHZ1	792	0.502867
	RKTKGKAKVVRKEFV	Q9NSI6	2186	0.502875
	KSTNHERKSTLTPTQ	O75376	1518	0.502877
	ISTFYMLKWLLEHCY	P86452	656	0.502878
	HLLTNHLKSKEVWKA	P10155	264	0.502879
	AVKEEEDKAQDEVQR	Q8NCX0	173	0.502879
	ELRIVFEKGEQENKN	Q9Y2I7	938	0.502888
	LLSKFRIKFADIHII	Q13621	969	0.50289
	RESHFLTKLHSLKML	Q9P2P1	855	0.502891
	FGNTRVIKQSSLQKF	Q13823	88	0.502901
	YDELNTGKGEGVAYR	Q9NZM1	527	0.502915
	TVKPSTSKGYLQAVD	Q5FWF4	898	0.502917
	SEDTHPYKEELETAL	Q9Y6J0	936	0.502929
	KGPQIDIKGPKLDLK	Q8IVF2	3249	0.502934
	IKQETREKENLVKEK	Q9UFE4	258	0.50294
	GLGPSTGKVLRIGLL	P21549	357	0.502955
	VSYSKKEKDSVILSI	P51587	2982	0.502961
	DSCKPLKKRSRASTD	Q9BZ95	632	0.502969
	NYYKIIKKPMDLSTV	Q9UPN9	999	0.502978
	LLNKAIKKRGDYDAN	P19367	195	0.502984
	GRCSAGQKVLASLII	Q92878	1206	0.502986
	LGKLERKKAIASLKG	Q9C0B7	515	0.502989
	TLQEVFEKATFIKVP	P19338	508	0.503003
	HSAHVLEKGGKVFSA	P09874	548	0.503009
	KLKHLPEKYMMNSVL	Q99594	384	0.50301
	NIVKWLKKEGEAVSA	O00330	79	0.503012
	NRLFVGRKYPEAAAC	Q9UNE7	41	0.50302
	KNLQAPSKLTNSSST	Q6ZU65	1148	0.503031
	EEIVPQIKAGKRVLI	P15259	176	0.503046
	KGLILANKAAKDSQG	Q2WGJ9	22	0.503053
	FIYTLRNKQVKQAFK	A6NL08	293	0.503054
	RLYKEERKKKSKDRP	Q6UB99	766	0.503055
	PTIKFYTKQILEGLK	Q6ZN16	755	0.503056
	NEVPPAPKESSTSEG	Q15424	370	0.503058
	QPKEKEEKNRDKNKV	Q8IVL0	471	0.503073
	ATPAPPGKAGAVASQ	Q13428	322	0.503078
	KIRDELCKNGEILLS	Q86U86	881	0.503082
	ILTFQGSKTHGMLPG	Q92823	910	0.503082
	GDSLELRKNHKNGPN	Q5VWN6	1239	0.503085
	DKAFITVKHRKQQVL	P17948	337	0.503101
	FMSLERIKTFEELLP	P17948	1226	0.503106
	RDYSKYYKTIDDLKN	P13645	201	0.503114
	AKRKSPKKKEKCEYK	P38432	187	0.503117
	SVTAGDGKFIPRKPF	Q14117	461	0.503139
	ACGPPQAKLNGQQAA	Q9Y520	229	0.503148
	GAAEQAGKLTEAVSA	Q9UPA5	3910	0.503155
	KTMSGKEKSKFDEMA	O15347	57	0.503157
	DSVSIGRKREWFKVE	Q8NFP7	116	0.503158
	NTRDTSKKTKDQLII	Q56NI9	370	0.503166
	ELQEMQLKEAKHIAE	P07951	149	0.503173
	QAEALLMKAGVQPGT	P0C7V9	155	0.503175
	AAGYDVEKNNSRIKL	P16402	76	0.503176
	VKPDTMEKLRTHIDA	Q8IWF6	582	0.503178
	AVARTSIKIVRLTTG	Q8WZ42	26474	0.503194
	NTEFKSTKEGFSIPV	O14715	910	0.503204
	GKIEKLDKLLKLREL	Q7Z7A1	145	0.503206
	KKLVIQGKHIAMHYS	P52756	169	0.503214
	RMSRGETKWEGKAYL	Q8N1A6	113	0.503214
	ESDMALVKDMELPTE	P27816	304	0.503231
	PDNVEEVKLLLHMWV	Q5VWN6	790	0.503232
	SPVQDGTKKPQIDSN	Q14571	1167	0.503238
	DIRMARFKVSGGLPL	Q709C8	805	0.50324
	YWHKEISKISLHPIE	Q9NTJ3	1041	0.503243
	IRKSLGEKPRRSRTK	Q9BQG0	631	0.503253
	EKREADRKTWSTVTP	Q8WZ42	19670	0.503254
	ESDWKVLKLVLGRLP	P49815	707	0.503261
	GALNCEEKLTLAKNT	Q9UPN3	446	0.503262
	DLLEIMKKFVPPDYK	Q93075	644	0.503263
	ERKVGKIKREMTKEE	Q6ZQQ6	1417	0.503271
	ENEDGKEKGDKKEGK	P82970	217	0.503273
	TNSEKLTKSKVQVFL	P50452	261	0.503274
	TTPFKDCKVLKQRPR	O14646	455	0.503275
	VLIAPLEKFRKEQIG	A6NI28	118	0.503277
	LKVLEEWKTHLIPSL	Q9NRI5	753	0.503281
	TFLYKFIKGACPKSY	P52701	1291	0.503283
	RKPQNRSKSKNGKKI	O14646	198	0.503287
	SEQKRDRKDAGTDKN	Q96T58	2046	0.503295
	TSPEGQPKVHRARKT	A2ABF8	236	0.503296
	NLWCPTLKVLCYYGS	Q9H4L7	572	0.503303
	AVPSDSDKKLPEMDI	P34932	832	0.503304
	LHTFESHKDEIFQVH	Q16576	316	0.503304
	QPQPQPPKLQLQPQW	Q3ZLR7	731	0.503306
	NIDFEPFKPINTSLY	P62495	118	0.503307
	PEKVYKSKSETRWGP	Q9Y520	988	0.50331
	HPDPKALKGFHPDPK	Q6ZQX7	333	0.503321
	TVYNLIKKRPDFKQQ	P40818	75	0.503334
	KNGGVGIKVMYMGEE	Q92598	102	0.503339
	AGSEMEEKVAPVKPS	Q6ZU35	118	0.503348
	QKFSDNDKLYLYLQL	P48382	61	0.50335
	GMDPLPSKMPKKPKN	Q12906	342	0.503351
	IGMMLDRKRDFELAQ	Q8NI36	887	0.503351
	LVVMAYAKFSGAPLK	Q5HYI7	31	0.503375
	PEDFVEGKSILSGSV	Q4KWH8	1120	0.503378
	YKSELFQKAKSLMQC	Q13315	748	0.50338
	QIQNKLKKDFPKQFD	Q5VZL5	136	0.503386
	NVFPAPKKGWNMEPP	Q86Y13	485	0.503388
	HGTLEKLKIHYEKYH	Q96JM2	1593	0.503388
	YFLHESLKNIYQFDF	Q14642	115	0.503392
	KMSCKDNKDGSCTVE	Q14315	1401	0.503398
	SQVLTQSKEEKEKQL	Q9UPM8	758	0.503411
	KAVTARHKKALEERE	Q2Q1W2	372	0.503415
	DLDNIHLKDTEKTVT	Q9NYU1	1075	0.50344
	MKTCQEEKLMGHLGV	O75533	969	0.503442
	VKKDKEDKPLKTEKR	Q9BVI0	183	0.503446
	RINSWENKLKLTQEV	Q9P2D7	1226	0.503449
	VVALNSHKSEKKKKR	Q6ZU65	310	0.503452
	DDDTKDNKATSPGPT	Q5VT06	1815	0.503454
	EKKELQKKQQLSAQL	O14686	3263	0.503465
	RRTHMAEKPYECKTC	Q9H7R0	514	0.503468
	TVVESSEKAYSEAHE	P61981	152	0.503483
	PERPESAKAFGREGS	O15417	662	0.50349
	SKEGKEKKEKHKTKT	P98175	640	0.503493
	EYKRMYGKSLYHDIS	P50995	479	0.503498
	RQQQLQRKRRDEAAA	Q5JVS0	56	0.503514
	RPTKSWLKKFLGFVV	Q9BYK8	2582	0.503524
	LTPTAEQKALATKLK	P49792	2645	0.503528
	GVDGSLYKTHPQYSR	P19367	418	0.503529
	IFDLGRKKAKVDEFP	P27635	40	0.503537
	QEENLKLKYRLNILR	P54136	52	0.503538
	CESGAGSKVEVATFL	B4DYI2	700	0.503541
	AYADDVEKSAQGIRE	O75354	151	0.503546
	SSPEEEDKSILNAVV	Q14CS0	241	0.503551
	TWSRNAGKLICVRYF	P11182	16	0.503555
	EPGVYTEKVLEATKL	P35221	571	0.503559
	HNNNTFLKHLENPPT	Q9BY89	718	0.503559
	RAQFSDFKWELYNWR	Q9H5L6	196	0.503562
	QRFNNFLKALQEKVE	P13010	660	0.503566
	NKRVHFIKWNEVTKL	Q7Z6J6	242	0.503567
	RLREELLKQTKLVQL	O00443	1048	0.503567
	GEVGMDSKFKKLHFK	Q8IVF2	4698	0.50357
	DVEKKKKKDKNNYVG	Q9UJF2	241	0.503576
	VFAKKDSKYAYTGEC	P30876	214	0.503578
	KEDSRSLKKKSPYKE	Q6Q759	984	0.503582
	SILKRGLKRSQEDEI	Q5UIP0	2187	0.503583
	HFRGDRCKTLLEKPK	P55210	172	0.503586
	SVAESRLKLGASVLL	Q6F5E8	595	0.503587
	LVYKDGSKQKKKLVG	Q13009	1309	0.503589
	EVGYSKHKNPYHNLM	Q14123	224	0.503589
	GLSEKSGKHVSAEEK	Q5RHP9	690	0.503591
	THNILDLKKYVTDIQ	Q562F6	593	0.503593
	LTDEEWIKVEVQLKD	Q6P2Q9	1978	0.503608
	KFGFIGFKSEEEAQK	Q9Y4C8	50	0.503623
	THKHSPEKRGSERKE	Q86X95	368	0.503626
	KTKPERYKEKSSDKD	Q6UB99	1029	0.503628
	KEQVDACKAVLIIFR	Q2PPJ7	543	0.503635
	AAILIGDKSENVQDL	P54652	387	0.503653
	GGTHRRSKKAKAPER	Q6ZRS2	2383	0.503653
	HSMTRAPKHLWRQPR	Q08493	30	0.503658
	LQGLVRQKERALEDA	Q9UPN4	975	0.50366
	AMSSGNAKIGHPAPN	Q06830	7	0.503666
	CVMGNIQKKLTGKAE	Q07617	387	0.503666
	CEEREQEKDDVDVAL	Q9Y5B6	668	0.503666
	SEVAAGVKKSGPLPS	Q01780	591	0.50367
	NSSTPKSKTVESAEG	P82094	368	0.503671
	QKQKKVKKPKPEFPV	Q96KC8	280	0.50369
	VSTRARSKLPSGKNI	O43237	50	0.50369
	VPRLYGFKIHPMAYQ	P67870	191	0.503696
	MFPTWPAKSEQQRVK	Q9UQ88	729	0.503697
	GQTLGTKKSSMVALK	Q3V6T2	1460	0.503703
	AEKISADKISKEALL	P42684	1083	0.503712
	GLPEDPEKAGQKASL	Q8IVL0	974	0.503718
	SSKRNLRKSREDLSA	Q07157	616	0.503725
	EFRSISRKIYEKPNS	Q9P2D7	853	0.503727
	SEAMSVEKIAAIKAK	Q6P1J9	181	0.503743
	SQARDENKRTHNDII	P15311	546	0.503747
	PLLVNVDKAVVSGST	Q8NEZ4	275	0.503757
	KGNKKPWKHFWFVIK	Q6ZV73	1351	0.50376
	AALGLSYKVQWPLHI	Q9UGJ1	458	0.503761
	PASMVGGKPGSFRVR	P35568	320	0.503765
	KPFICHRKTKGGDLM	Q9NWM8	41	0.503778
	AYVMLGNKAQTVLNG	P54132	1176	0.503783
	GKAVAKVKCEARSAL	Q14865	284	0.503784
	FGGPNTKKQCCVYRK	Q9UMN6	997	0.503787
	KISFKNLKRVAKELG	P41208	127	0.503789
	EHKNGEIKPKSRRRW	Q9UPZ9	398	0.503789
	EESMTDEKTTKIACK	P46013	1123	0.503795
	SERTTPSKAQKSPQK	Q9H4G0	82	0.503798
	KETAIETKVTVSEEE	Q9Y4K1	344	0.503814
	PRLPPGRKPPGPPPG	Q9Y2W2	198	0.503814
	NKSQLVQKVRSKIGC	O15105	312	0.503815
	QPQPLLRKPSVSAQM	Q68CZ2	569	0.503824
	SDSNMVEKPYGRKSK	Q6UB98	24	0.503839
	KPFVLRSKMGKWCRH	P0CG38	23	0.503844
	VGSSTGEKNERTSVA	Q96EB6	610	0.503858
	ERMIKQLKEELRLEE	Q86YP4	149	0.503864
	IGKKFARKRDHANYE	Q99547	132	0.503864
	HRLYQQIKAGAYDFP	Q13557	227	0.503876
	KGRRHIFKLKNPIKA	Q8WUU5	122	0.503879
	PVSAVGYKRPLSQHA	O15066	636	0.503882
	LLAFQVLKQLQSIWE	Q9UBF8	580	0.503886
	HRYVEVFKSNSVEMD	P55795	87	0.503888
	AKHCQENKCPVPFCL	Q92793	1837	0.50389
	GAEEPSRKNATSLIL	Q96QE3	1296	0.503893
	YPGEVKGKGITMLEE	P16234	256	0.503897
	EDAKGQVKSQHPLSW	A8MW92	145	0.503903
	EIQELQSKPDRSAEE	P55196	1546	0.503923
	DAMAEKQKLDAEFQK	Q9H875	104	0.503923
	DSPTVAPKSTTFLKN	Q9UMN6	516	0.503933
	FRGAGPNKKVAKASA	Q96SI9	559	0.503934
	EVASIVLKFKPDKWS	Q9UFH2	21	0.503936
	NKTAHQMKVQHFYQQ	O60318	1324	0.503943
	ELMNPSQKKKRKHRL	Q92800	492	0.503946
	QLKIELKKAQESQKE	Q5VTR2	635	0.503963
	HDDKLTPKIGFPWSE	P35241	237	0.503968
	ALMTVRKKRAIYPNE	Q5VZP5	258	0.503968
	KFLEKPYKHKQRRKA	Q8N8L2	76	0.503971
	SIYPGEFKMPKQLIH	Q9H2F5	95	0.503975
	PNLSRAGKKSVLSQG	A6H8Y1	628	0.503976
	QAEDESAKLCKRRIE	Q7L5Y9	97	0.503977
	EFTKVKPKRSKGEPP	O15391	244	0.503977
	ITFPKSNKPIISLTF	Q99698	3752	0.503985
	SELFPTFKDIRREDT	Q9BVS4	288	0.50399
	WLIEQDKKMKENGRE	Q15397	567	0.503992
	NYLPPEMKSFFTPGK	Q9NTI5	1117	0.503998
	DLRDNKLKSVPDEII	Q9H9A6	302	0.504004
	TNQRIDNKCSTGYEK	P49790	403	0.504006
	VKETQEDKLEGGAAK	O43491	184	0.50402
	HTANLSTKDNGNLCD	Q562F6	576	0.50403
	SPLVWPPKKRQNGPV	Q8IVL0	1774	0.504032
	HELEKVRKQLEAEKM	P12883	1531	0.504046
	EDQLVFLKSRKRLAE	O15050	1900	0.504047
	FPYVEGDKSFAEGQT	Q9BZ95	1024	0.504056
	DDGVIVEKGNHDELM	P08183	609	0.504059
	KMKVQEEKKQKQQSA	P16499	826	0.504066
	VEKEALKKIIEDQQE	P05455	317	0.504068
	LSDPKQAKVVARRES	Q15059	274	0.504068
	CPQGWHFKKDWVVEL	A0AVI2	900	0.504073
	LTWQCHNKTANDFVF	Q9Y485	2839	0.504076
	LLFLRYHKEKEVVAV	Q96Q15	537	0.504081
	NVKSRKLKEIFNKAL	P46100	1701	0.504082
	IESSGKLKISPEQHW	P45985	88	0.504091
	NLGSGTYKLTTMKKV	Q6V0I7	4047	0.504098
	TENGITLKMPQQARG	Q4ADV7	660	0.504098
	QLQNHMLKHQNVRPF	Q8N1W2	456	0.5041
	HDNADFGKAASAGEQ	Q86SQ7	215	0.504103
	KRKISPSKKESESKK	P35251	521	0.504105
	ADEDSIRKQQVSDST	Q9H3D4	361	0.504105
	TVEKSRQKYKPASLT	Q6ZS30	184	0.504122
	YHTLTNYKAFSQFLR	Q8TDI0	162	0.504125
	FDAAMNEKMDLLNDA	Q96JB1	3336	0.504129
	GLAWARSKNPQEMLH	Q9NU22	4151	0.504131
	SVEQKLQKLSDFLTL	Q8WXH0	1877	0.504142
	EIYKDRQKFSEQVFK	O75955	126	0.504161
	GMASPWGKQDLSAAA	M0QXA7	326	0.504163
	KFQKGEGKDEEKYID	O75525	40	0.504165
	KYLKAQTKERIVPEH	Q8NDH2	1614	0.504168
	FITTDSSKLVSGVLG	Q7LBC6	700	0.504169
	QLLFEMCKGVRNMFH	O75691	233	0.504179
	RKNSKASKSRTQKAL	Q8WZ64	434	0.504184
	DHTNEQQKILEQKRQ	O15066	490	0.504185
	HPGFTGPKRQNRILL	Q8NDH2	1968	0.504199
	FPLIEAKKKDQVTAQ	P13010	544	0.504203
	WLTQVERKIQKDSLS	P46013	455	0.504205
	NIGNDSKKTDGTKQR	Q14123	628	0.504215
	AGKTLQEKLYDIYVE	Q3ZLR7	39	0.50422
	GQVYSWGKGDNQRLG	O95714	683	0.504222
	WTDLSLEKKSCPYCP	Q9H582	962	0.504223
	KVKEGNGKTVPGETG	Q6P0N0	324	0.504233
	QAELLLKKVTEESDK	Q03001	6337	0.504234
	GKNPDITKAWKLICD	P54136	306	0.504236
	SELQELGKTNLEHTT	Q8NG31	810	0.504236
	PTTGMDPKARRFLWN	Q9BZC7	2219	0.504238
	KIFIRFPKTLFATED	O00159	721	0.504243
	QQKLKQAKLVEQYRE	Q5F1R6	248	0.504247
	SNCVLTGKTPAEFAK	Q9NW08	150	0.504251
	NYNQSLEKWSLSQAV	Q6PGP7	1326	0.504272
	WSPSKHTKTGREKAT	Q8IVF2	599	0.504275
	EVRERCWKDHCMDKH	Q92802	374	0.504283
	QQPQTQEKTSNSLTE	Q12888	858	0.504284
	TQHVPLLKKTLELLV	Q9BXW9	1361	0.504298
	MLVPIGDKPSSIADR	Q9Y512	329	0.504302
	IKLAEGLKNLKKMCL	Q9NPP4	788	0.504304
	MEALSADKGGFLYLN	Q9UIG0	645	0.504309
	EENQRLLKQTEMLTQ	Q8TDM6	350	0.504312
	LRSHCTVKDPESLLV	Q8ND04	362	0.504314
	LDALRREKVHLEETI	Q14789	2152	0.504323
	YIERDEVKQIASIIQ	O14686	5163	0.504328
	HGSTYSLKRVEMKIR	O43827	333	0.50433
	TVYVFAKKDSKYAYT	P30876	211	0.504337
	RLRSSGKKNSVSHKK	P30414	765	0.50435
	IRSSPGAKLKALEEA	Q8TED9	661	0.504352
	SCSRSRSKRRSRSTT	Q9UKJ3	971	0.504371
	LIPQCSQKKAQKITE	Q9H4L7	410	0.504372
	VGKGLQVKAASVPVK	Q13428	725	0.504372
	KLRHDLKKTSITQQP	Q9NYY3	404	0.504375
	IQSVYISKIISSDRD	P12956	74	0.504385
	EHALGDIKRTFTELT	Q8IVF4	1176	0.50439
	GAKVVLSKLPIGDVA	Q99832	292	0.504398
	IYVEECGKEPEDPQE	Q3ZLR7	50	0.504399
	VRLLVDSKDDERVPA	O14893	251	0.5044
	HSALKIFKTAEECRL	P40818	45	0.504401
	YSKRPTKKKTPRDYA	Q07617	152	0.504404
	KNGFVVLKGRPCKIV	Q9GZV4	34	0.504404
	IEFEPKEKVQCPPTR	Q149N8	436	0.504405
	TARAIQRKPNPLANS	Q14669	799	0.504409
	IQKSTLVKHQITHSE	Q9Y3M9	449	0.504412
	KTADEICKAIHVFDL	Q96PY5	718	0.504414
	ELERKFVKDFQDYME	O43237	179	0.504414
	PMGRTILKVTPEKQT	Q7Z7B0	1038	0.504414
	WMTSSYCKADPWRVY	Q2M1Z3	1151	0.504416
	CESVKKTKKSPGSGC	P46100	1583	0.504422
	ELEEQTRKALELDQE	P35241	371	0.504422
	VLLSGSDKGRAGTLS	Q9H8X2	275	0.504428
	KDWFLENKSEVCECR	Q6P1Q9	120	0.504428
	SPGKLLVKMPFQTSP	P51608	223	0.504434
	ASAQNKEKIASLARQ	Q9BXW9	1154	0.504436
	GAPVRTAKAERRHQE	Q14160	1462	0.504437
	YLLQCNMKFMTQSAF	Q9C0D5	744	0.504442
	KISSYQLKIRGSNMA	Q9NYQ8	1729	0.504448
	LQYRVWKKMLASVES	Q9UPQ4	294	0.504451
	EREQLRAKLNREENR	Q9P2B4	252	0.504474
	QRHSRGTKLRKLILS	Q9UBF8	235	0.504482
	KKKHRKHKHKGKQKN	Q9BRR8	881	0.504482
	EAEKLAQKRKKLAKK	Q6ZQQ6	1661	0.504487
	KDTPGLGKVKVMLRI	Q2KJY2	450	0.504487
	GCILSELKQKGDRVV	Q9H4L7	867	0.504495
	SLEEPVSKPDMGLVA	Q9BZ11	62	0.504498
	KCVRDCEKYKPGVLL	Q9H2P0	817	0.504519
	DTFRSEQKLPGRSPS	Q9Y6V0	124	0.504527
	SGLLAEMKAKQEKRA	Q5VZK9	1172	0.504532
	ASTSGKMKSSKSEGS	Q15648	1115	0.504535
	RRAAEEGKDYPFARF	Q9NPF5	122	0.504537
	VKELPTLKDMDFLNK	Q8TBX8	241	0.504538
	LSSDLQDKQVEMLER	Q6DN90	119	0.504543
	NLKGPKMKGEVDVSL	Q09666	3234	0.504547
	IHFGATGKLASADIE	Q9Y623	260	0.504549
	DDEMETDKQEKKEVH	Q9UL46	82	0.504564
	LLLEDWHKFIEEKEF	Q8WXH0	524	0.504577
	PSVPGPTKPKPKTKR	Q03164	3535	0.504577
	AYSSIAAKNAELEQE	Q5T9S5	600	0.50459
	TLKISNPKGWVTFEE	O43426	1479	0.504593
	EPDIKPQKDTGCYIS	Q5VW32	404	0.504594
	PIPSWYMKKKKIRTD	Q96T58	1496	0.504599
	IEVVFVTKFLYSILA	Q96RL7	1163	0.504611
	KFQGQCYKYFAHRRT	P13611	3182	0.504612
	DVEISETKKADVQAP	Q5UIP0	1763	0.504614
	SSPERQLKVMLTNVL	Q9BQF6	98	0.504626
	QQKLKQQKKKASLTS	Q14157	489	0.50463
	LFLESTNKIYKDDIS	Q9HB90	98	0.504631
	GSTIAILKRTECQFL	P25092	973	0.504638
	SALSHPAKPHSVSSA	Q9NPG3	888	0.504638
	KDVGERQKVLNWLLS	Q8IZT6	811	0.504641
	HSPPNKPKLVVKPPG	Q92560	333	0.504647
	KLKNTTDKKNNENRE	Q12830	1513	0.504653
	TYKVATSKTSAKLKV	Q8WZ42	2697	0.504655
	SAYLVAEKVTVITKH	Q14568	147	0.504668
	FKKKPDPKPADEAVP	Q7Z418	193	0.50467
	VAHSMASKYQSSQGD	Q9HCD6	1643	0.504674
	KEVSGERKTQKAASN	Q8IY92	75	0.504682
	QVVAETRKRKGLKEG	P13639	840	0.504695
	LENIDRRKNEIVPID	Q8NF91	8573	0.504696
	EKRQAEKKKELMKAQ	P53814	746	0.504699
	RLDPPEDKTITTLYV	Q9NW64	229	0.504702
	LNTSDFQKLKRKYAA	Q96B36	251	0.504717
	SKSWVLWKDIQTGAT	Q9Y483	91	0.504722
	KRIFSSEKSNPFAFG	P0DJD1	1546	0.504733
	NQPVSWCKVEAMALK	P09884	515	0.504733
	APLEKRVKELAQAAR	Q9NPG3	366	0.504735
	EQFAKLLKQKRITLG	Q01860	154	0.504737
	MPSFKVPKVDLKGPE	Q8IVF2	1423	0.504739
	EELISTLKDTKGAQK	O15078	1336	0.504742
	SQGKHKKKGNKLLEK	Q14684	366	0.504745
	EIETSEVKKVTSSPI	Q12830	1668	0.504752
	SSTQPAEKDKKKRKD	Q96QC0	155	0.50476
	RETASTSKIPALEPV	Q9Y6X0	250	0.50477
	TEEVATVKIQEAEGG	Q8WZ42	4275	0.504775
	KSASDNSKAEETQGN	Q6T4R5	1393	0.504775
	ISQLTRGKLTYTQQL	P12883	1305	0.504778
	SINGLINKVNISNIS	Q9HCG8	172	0.504779
	EPGVIMFKTDALKCR	O60244	1243	0.504782
	AEVVFVKKDDAITAY	Q9BY77	324	0.504787
	RVLQEEMKEGTDMFI	Q7Z2Z2	1016	0.504789
	ALELTGLKVFGNEIK	P19338	370	0.504794
	TLKAVCLKNGIYASR	Q68CJ6	555	0.5048
	ETTSNCFKQTIEKVL	Q8TD57	2337	0.504802
	LQKEEAQKLLEQYKE	Q00839	664	0.504804
	AGASPAEKGGGPRGD	Q8TE49	603	0.504811
	KKANSMVKSFFIRQM	Q03164	1755	0.504813
	SGSTSVRKGPLPFLI	Q8NEV8	1112	0.504819
	VFKFLLEKQRWPEVL	O15050	394	0.504821
	TPLDFPSKKRKRSRW	Q15637	15	0.504825
	IDRISPEKKGEKENG	Q9ULD2	666	0.504854
	MTTETLKKIQIDRQF	Q9H095	167	0.504863
	EKALLQHKNAEYQRK	O75116	511	0.504864
	NMRATYFKISHEMLD	Q8IVF4	4003	0.504866
	AAAAMADKMDMSLDD	Q86V81	4	0.504878
	KEEQEEYKREGIPWT	Q9UBC5	421	0.50488
	PKTYDMLKAGTTATY	Q99959	112	0.50488
	KLRKAVEKGEEDTFS	Q86XL3	319	0.504883
	DSSGSILKVSSSTTG	Q9Y6J0	808	0.504886
	VHSKKRLKPLIPGLR	A6H8Y1	2532	0.50489
	SVHYLVLKDMCSSIL	Q9BXW9	429	0.504902
	GHLNNFTKLLCDIGH	Q6R327	65	0.504908
	SEKKDDKKGKEKSWY	Q6UB99	1107	0.50491
	YECNECGKFFTYYSS	Q13398	292	0.504912
	FASKAAAKTQETNKE	Q15054	203	0.504923
	MKYMETLKNKLCSCK	Q9NRI5	676	0.504925
	HIKRLQEKITEIEKC	Q9C099	846	0.504932
	CRYALQVKPQRLMAA	Q7Z2Z2	976	0.504932
	VNFTDICKLLHRQPK	P20042	227	0.504943
	CSVTQERKQIHCLSE	P51957	671	0.50495
	LYEAAVKKVPNSEEY	Q14CX7	108	0.504956
	RNPPPRLKSKKWSKK	Q8N4C8	254	0.504957
	QSTRIGLKLIDILLR	Q9NR09	3395	0.504959
	EEESVLCKEIKEYLI	Q9UK61	1246	0.504964
	RKAGYKKKLWKKTPA	Q9NZE8	132	0.504966
	HQKGDEAKLEIRDTT	Q8WZ42	9438	0.504972
	TSLINQKKKMDADLS	P12883	1728	0.504974
	VGFVREDKENNKKLD	Q58FF6	331	0.504991
	VEKETQEKKRLSRTN	Q5JR59	1319	0.504999
	EPLVEALKVGEIGKE	Q8IWB9	927	0.505003
	DELREHLKNTPKVIV	Q9HCG8	648	0.505006
	HQRKSIFKIKKKSLS	Q8WXD0	716	0.505018
	KCHPNQIKHLDFLKE	Q8IVG5	430	0.50502
	YFTRHKRKEKKKKAK	O95707	67	0.505022
	GKKPLELKTKRESQV	A4D1E1	509	0.505024
	GNILKAMKSAESQGR	Q86XA9	146	0.505026
	GTLKLPEKRTNGLRR	Q9UKW4	578	0.505028
	SMLLDLNKEIMNELG	Q8N9M1	84	0.505039
	ATFMESEKQDVHEFL	Q9Y6J0	468	0.505044
	LDAPAVNKAIKSPPG	O95785	964	0.505044
	DHGKELEKLRKDLEE	Q9Y5K6	610	0.505045
	TQEIDFLKTLYMEEI	Q9NSB2	299	0.505049
	ALRQTPQKVRLVVYR	Q8NI35	1511	0.505052
	NQKPSEAKKVEMYKQ	Q9BXG8	371	0.50506
	IISHGKLKCCGSPLF	Q9BZC7	1200	0.505065
	KLIKSYQKSQKDISE	Q9BXG8	273	0.50507
	AQASEISKALRREGI	Q9BYK8	2533	0.505074
	SAADLYIKDYLHPYV	P42694	708	0.505091
	KEDQDLDKMFGAWLG	Q70E73	26	0.5051
	EKLKYEEKATKDLER	P54277	623	0.505103
	SFSAPRKKSPDLSEA	Q9BT25	138	0.505118
	PKQKLSKKQKKKKQK	Q5F1R6	385	0.505124
	KATQRQIKAAHKAMV	Q99543	108	0.505125
	VEKKWGQKGGPWEFN	Q9NU22	1940	0.505138
	KSPGVEIKSLRELDS	Q9Y597	717	0.505144
	RTGRAGEKGVAYTLL	Q86XP3	595	0.505147
	GVRRDEPKVKSLGDH	O75334	591	0.505154
	YAAKDLEKHTMVIEY	O14686	5419	0.505157
	ENKYSRAKSPQPPVE	Q00839	270	0.50516
	IRKRKEEKLKEQEQK	Q9NRL2	674	0.505166
	IINSKDVKVQVMGKV	Q01518	398	0.505174
	GGGGGMAKASAAELK	Q8NEY1	58	0.505182
	LTGQAEGKLISVEYG	Q8IVG5	1532	0.505191
	WKRISVIKSVFSSRS	Q96QE3	1776	0.505199
	LKPWGQSKENNYLNQ	Q9BXS6	384	0.505222
	GPKESALKALNSDMP	Q8ND04	881	0.505226
	YPSPTCVKSEMGPWM	P10275	521	0.505226
	HIEQWSLKQARIDFW	Q96JI7	1724	0.505227
	NPPIFSHKLFNVRLP	Q9NYQ8	1245	0.505241
	RLEAALVKRPNPDIL	Q9UQ35	51	0.50525
	TKPQDEVKAVQLAIQ	Q9NYL2	544	0.505278
	ERFTSYQKATEEHST	Q9NYF8	637	0.505279
	EGEGQFEKLCQESAK	O96028	292	0.50528
	ETCVECQKTVYPMER	Q9UHB6	395	0.505291
	RGNLAESKCYLITVT	P40189	490	0.505296
	VDKKSGEKSKTRPRF	Q8IYD1	568	0.505322
	QPALKGKKGKEEKSK	Q8NE71	177	0.505322
	SFYMQRIKHTDLESP	Q32M84	424	0.505328
	YCRRTMKKIKRRTDT	Q8WZ42	32602	0.505351
	QSSALEQKWLIRMII	P49917	184	0.505352
	HFKSAIEKLTHDYIN	Q9NYL2	406	0.505353
	RINANRRKLQRELDE	P35749	1902	0.505367
	NRINESIKAQTKVRK	O43795	373	0.50537
	LDPLAYEKARHQIQS	Q8NF91	4853	0.505381
	LRQLKAFKSVLADIK	P46100	396	0.505385
	HSSPKWEKDCQESDE	Q96GX5	325	0.505387
	EKRALRKKRKALEFV	O75691	2729	0.505389
	IDEQRKTKPDPLIHV	Q8TCN5	40	0.505417
	LSLRVTAKELSLVNK	Q9UHB6	21	0.505417
	DFTPTKYKERAPEQL	Q9H4I2	617	0.505419
	GDIPKDVKNEKQHIP	Q8NDH2	729	0.505422
	LRQGIRDKQCYELCA	O60287	1799	0.505424
	QLLQMQLKVLEEQIG	O14686	3526	0.505425
	KRTRRAVKFQRAITG	P83731	77	0.505429
	MLREAKEKEKQRLAQ	Q8IWE2	272	0.505438
	QTRPRVVKRGIDDNL	Q9Y6Y8	425	0.50544
	ELKKAYRKLALKWHP	Q5F1R6	25	0.505441
	GVPESVKKPINKQGD	Q7Z5K2	526	0.505445
	VRDPKTGKAVQERNS	Q96Q15	3600	0.505445
	LSIKQKGKRELYMEK	Q9H5I5	2141	0.50545
	EGKEKKEKHKTKTAQ	P98175	642	0.505454
	HLSIKPVKQEETPVL	Q9BXF3	316	0.505464
	QAKIKQLKAFQQEIS	Q8NF91	8150	0.505482
	NLFEVYLKPYFLEAY	P55072	136	0.505497
	EKPPPGEKPSVFHTL	P49917	496	0.505497
	SVLRCGKKKVWLDPN	P84098	20	0.505517
	ELFKRLDKFAAEHTI	Q16836	136	0.50552
	EDVIHMLKTEKTKPE	Q7Z7B0	102	0.505522
	PEVAPAPKSWASNKQ	Q9Y520	119	0.505524
	PLPSIETKAEQLTKH	O75691	2151	0.505533
	EAKMLAQKAEEKENH	Q14807	500	0.505535
	VVKYPPGKVIEPGCV	O60884	302	0.505538
	IDEEPVSKAKQSRSE	E9PAV3	1929	0.505544
	FQFVAFIKRRQRAVP	Q9P2K8	1336	0.505545
	ISKRDFHKAMESHKH	Q92736	4050	0.505549
	VRHNDLGKSHTVQFS	P51784	209	0.505551
	RGSASPHKSSPQPLV	Q9P0U4	141	0.505552
	RKDTLAMKLNHRPSE	Q8IZ21	551	0.505561
	VALDKARKGRTTIVI	P08183	578	0.505562
	YQEGRLQKLLKMNGP	Q16881	147	0.505563
	GRGPQGDKAIREQGP	Q96AQ6	364	0.505564
	HWELAGTKLGDIMGV	Q92620	474	0.505566
	VETTLKMKDDSKTDT	Q8NFC6	2890	0.50557
	TPQSVTAKQPPEIDK	Q86UE4	150	0.505581
	KRKRKKKKRPEDTAA	Q9P275	850	0.505591
	RKRRAELKQQREEEA	O94851	1073	0.505593
	PKPAPSPKTEPPQGE	A1X283	651	0.505595
	EEKEALRKAYQLEPY	O14529	1185	0.505597
	YDFLITRKAERDVDN	Q8WXX0	504	0.505599
	GKQVEYAKDDGSKRT	Q5JUX0	218	0.505602
	QLRRVFQKYTKYSKH	P04083	239	0.505609
	LQVLKLKKVFDYIGL	Q8WXH0	3003	0.505615
	QSIIRKVKSEIGDAG	O14529	776	0.505617
	DNNSKWVKHWVKGGY	P46940	687	0.505622
	FLGNKLLKSNRLKHL	Q6NW34	399	0.505626
	GVGHEFQKVSVDKSF	Q6GYQ0	709	0.505629
	DGASWNRKIKKLAES	Q8WXX0	3938	0.505634
	LSSGTRLKHHGRQAP	Q8IX01	711	0.505636
	QAVLTVPKLKLSYEG	P36955	316	0.505643
	RNPKGNKKNAGFTPQ	P27695	228	0.505644
	KVQDLSLKANQPTDK	Q13023	2283	0.505646
	KMPKVDLKSPQVDIK	Q8IVF2	3407	0.505647
	VARHKMDKEINNRTC	O43520	171	0.505655
	KEAKEATKNGDLEEA	Q2NKX8	33	0.505657
	ALLNIKVKLEAEIAT	P05783	372	0.505663
	PQQLPECKVDSETNI	Q9BYW2	1937	0.505664
	SDLRVARKNWHANGY	Q9NSI6	1731	0.505664
	DVKYIEMKRVAEAKK	Q9Y3A2	108	0.50567
	KICLAFEKAKKIHLE	Q5T9S5	635	0.50567
	RLRRLRNKTAHQMKV	O60318	1318	0.505674
	SKLLRELKNLDSRQC	Q2PPJ7	1636	0.505678
	PLTTWRQKREQSPSQ	Q5T5Y3	858	0.505679
	RSTSLTEKDLKEAKA	Q8N3V7	144	0.505702
	QIFVWKGKDANPQER	Q9Y6U3	299	0.505706
	PAKKAKLKAAGMASP	M0QXA7	316	0.505707
	AALHPSPKTLTCEEN	Q13023	2298	0.505716
	LSSTPAPKYLKILPS	Q6PJP8	533	0.505718
	FVINDLQKINPLYQF	Q96DT5	3724	0.505719
	FICNDDFKHKLFRIK	Q13620	815	0.505724
	AGSTKMGKAVLDLQN	Q9Y2G9	402	0.50573
	LTTGLLCKYTAQRFK	Q9NPP4	429	0.505732
	ANPLFERKDNKKEAL	Q9UFH2	808	0.505735
	EAVWKEAKPDELMDS	Q9P0L0	117	0.505743
	KVISFLTKSVKQIKE	P24462	251	0.505745
	DRLIGIYKTYNITKS	Q9NTJ3	1267	0.505746
	VRVYERKKEDQRQPS	Q8IWI9	1248	0.505766
	LILPKRLKSSTSFAN	Q86WC4	321	0.505772
	WTKYRSTKKLSQRVC	Q2M2D7	92	0.505779
	EVRIHPSKGPLPFQM	Q8IVF2	5303	0.505779
	DLANTKVKLIQGSEL	Q03001	2751	0.505799
	PGSQRRRKFLNLRFR	Q8IVF2	322	0.505809
	GSEIMQKKQHLEIEL	P15924	1288	0.505817
	APRLRINKRILQLCM	P15311	278	0.505819
	SRQKDRQKEMDNFLA	Q8WXX5	229	0.505833
	RDTLCVTKNWLSADT	Q9NQW6	1084	0.505834
	PKCAAHSKDEARSSF	Q6P4F7	756	0.505841
	KKQEQEVKTEAEKVI	Q9Y6V0	1165	0.505851
	ISQELKLKSFTYEYE	Q6UB99	655	0.505857
	AKKSSSLKEVVAGAP	M0QXA7	123	0.50586
	APTTTAEKPPAEAQD	O00257	517	0.505863
	GNCKPLQKDKLPENL	Q7Z5J4	419	0.505864
	MVKNIVPKLGMCLGE	Q9UBB9	615	0.505886
	VTLSSSRKEAVSLVK	Q8TF72	89	0.50589
	ITEDIPVKTLNMKTV	P41252	1244	0.505898
	WVFNVAKKYMKSTYE	Q9NR30	388	0.505898
	TNSRLMKKFEESRAE	Q8NF91	931	0.505899
	FWKRTNEKGAFWGLI	Q8WWX8	478	0.5059
	FLHSLLGKVIASKGD	Q92608	366	0.505906
	KHKAAAEKAFQEGIA	Q9UIG0	885	0.505907
	TIAVATAKAKEQETI	Q8WZ42	665	0.505918
	QELSENDKPRKSHLP	Q5RHP9	628	0.505935
	SPFATTTKYPTFQDR	Q9P0V3	644	0.505937
	VRRVRVVKQEAGGLG	Q13425	120	0.505942
	YKQRCAKKGIEHDNP	Q9Y4A5	3604	0.505944
	LREERGKKEEQSRLR	Q96L91	860	0.505956
	EILANYRKGQEEIVT	Q9BZF9	955	0.505957
	PQSTKKMKPAIAPKP	Q6ZV73	49	0.505958
	YLDLRNIKRNHDRFK	Q5NDL2	167	0.50596
	RRFLSLKKTAILIQR	Q8IZT6	2287	0.50596
	FVEKERDKEVSDDEA	P07900	228	0.505976
	HETLEWLKEEKRRDE	P52701	374	0.505978
	LPLKGAEKAEVVETT	Q15149	3685	0.505979
	SSSYRSYKSHRTSSR	P30414	1378	0.505982
	ENIFSLEKMECKTPA	Q2WGJ9	1683	0.505991
	AAQLLQVKKKTDDDA	Q9Y4I1	1757	0.505992
	RSENDYLKDELDELR	Q9Y4B5	351	0.505997
	EVTDAYTKEKQPKDA	Q6UB98	1152	0.506019
	LKEEEKKKSKLDEFT	Q7Z6E9	655	0.50602
	QQLQMEVKMLSSSKS	P12757	560	0.506021
	LVANFFPKKLLELDS	P61289	36	0.506038
	DPKDLEEKVTRMEGS	P29973	626	0.506042
	YVLTDHKKDLLEVPE	O60284	228	0.506047
	AEYGTNAKESVTDYT	Q9Y520	2184	0.506047
	EEMEKYSKLQQAAQQ	Q9UKJ3	1322	0.506049
	EEHHQSLKALVLPSP	P18858	813	0.506053
	YCRECREKDPKLEIR	Q9P0U4	76	0.506078
	AYRDDNGKPYVLPSV	P00505	73	0.50608
	DFETLKEKNDGEKQP	Q9P2B4	67	0.506088
	SVPPSQTKSETSWES	Q86UE4	561	0.50609
	AILSAPAKLIGHGVK	Q6ZN66	613	0.506092
	LHVPTPGKVQVQASQ	Q96L91	666	0.506094
	LSNSPSPKTFEEVQF	O95803	629	0.506108
	LVIVDQEKCFSAQNP	Q96AY2	368	0.50611
	LTQSKEEKEKQLLAS	Q9UPM8	761	0.506115
	QDHFKWVKQQCEFAK	Q9NVZ3	130	0.506119
	EAAQEAVKLYNNHEI	O60506	221	0.506127
	DQSPWEEKAKLDPEP	Q9BY89	389	0.506133
	TQKTQGKKRKAQSIP	Q9UEE9	52	0.506141
	REAFTDLKHAAREKQ	Q9NWS1	210	0.506144
	FGHYDNLKVHERIHS	Q9Y2A4	548	0.506146
	EWLLSAHKQLTQDMS	Q96Q15	3377	0.506148
	SLAMKLLKELHKESK	P78527	3260	0.50615
	IALSLNNKNPRTKAL	Q96PY5	258	0.506152
	DFLKVIGKGSFGKVL	Q96BR1	170	0.506152
	GYTIPLDKRLAADGR	Q13573	266	0.506158
	RAEKLKDKKTLEELQ	Q6XZF7	1144	0.506162
	DFEPLKEKECLEGSN	Q9ULH7	27	0.506162
	GGSPGLAKRGRLQPP	Q6ZRS2	3153	0.506162
	KEVKEDDKVSEKLED	Q5VUA4	1228	0.506166
	IRCERRMKWHSEDEI	Q9GZY0	90	0.50617
	FQKILKAKSKHTGIL	Q7L590	738	0.506174
	AEHDLHQKEQIREKL	O43361	123	0.506178
	IGSPYRDKITIAILQ	P39086	792	0.506185
	VNQSTKRKIQSSLSS	Q5W0B1	710	0.506186
	ERLKEATKINLSLSA	O15066	267	0.506192
	DPLKNRLKEIEHNLS	Q92878	256	0.506199
	IRWLEDEKALLEMTE	O00139	643	0.506204
	PHPWSPEKRPEGDRQ	Q9H2D6	1381	0.506216
	KLETQYCKLKETSSF	Q9UPN3	667	0.506219
	GFIEAVFKHEGIVEH	Q9ULI1	1355	0.506229
	VHQLEQEKQRLSKKV	Q66GS9	403	0.506231
	IRKEIPAKIIFEDDR	P49773	30	0.506234
	TYIKPISKLQATNAR	Q9Y4I1	393	0.506234
	MKSKEARKYIFNSLD	Q9H422	465	0.506236
	LAKDSGFKVVAHMMP	Q9H9T3	280	0.506241
	EQEISQLKKEIERTQ	Q5T9S5	1098	0.50625
	AAAAAMGKGDPKKPR	P09429	3	0.506252
	ELVSSNTKANMSIIE	Q68DQ2	791	0.50626
	PLFGNVKKENHSSAK	Q6PIW4	226	0.506263
	CIVEALKKDHGKELE	Q9Y5K6	602	0.506264
	RLQMVKKKAAQKKLK	Q96CB8	454	0.506275
	NLVRDINKVGIGLVA	P12757	503	0.506277
	YTGPRLYKEPSAKSN	Q9P1Y5	1114	0.506277
	SHGLLLKKSPVLQYL	Q01432	614	0.50628
	QRMDTTGKTVLHTGS	O14646	945	0.50629
	STAAGMVKGVVDHLL	Q8N884	187	0.506291
	IPECQGSKSPKAIFE	Q8IZT6	445	0.506292
	NTNEYLEKIKQRLFE	Q13547	361	0.506292
	TTKDSRFKIPKFKMP	Q8IVF2	2484	0.506295
	YYTSFVVKDELWLVM	Q9UEW8	131	0.506302
	EKVLRNNKNFSTVDI	P43246	537	0.506302
	KLEEQRPKRVKPFMT	Q56UQ5	114	0.506312
	EPQDGVIKIKASSLS	Q9NRL2	240	0.506318
	LPDRELSKFKSYVNP	Q86X10	600	0.506322
	FSSDKKYKDSYLKDI	P20929	423	0.506325
	GPLSFGTKPTLGVPA	Q7Z5J4	711	0.506328
	TRSRIPEKVFQASPE	Q8TCC3	44	0.506331
	NDIATVRKLAKPPHL	Q96JB1	3175	0.506332
	KPASMLEKNCSLQTE	O43303	533	0.506334
	GPPSWRNKMHSIRNL	Q9UKN7	1203	0.506349
	AEMHNILKKYHQYIV	P48426	160	0.506354
	SRFEDWLKSSERTAA	Q8NF91	8016	0.506355
	FINDQYEKYLQEEVN	Q9UHD8	389	0.50636
	AGLESNLKKTEDRKR	Q8NCM8	3121	0.50636
	QDLRVAPKLFKPQQH	Q8WVS4	898	0.50636
	KKQRSIMKNWQQRWF	Q7Z5H3	52	0.506361
	VNECSSSKNPCNYGC	P35556	2703	0.506372
	VYPRPPSKTYRGAFQ	P10275	17	0.506378
	DEILENQKPALHKLA	P46939	961	0.506398
	QVEMTPEKFSVLMEK	Q9HB96	468	0.506401
	LIKSMPLKQQLQWDP	Q9H5L6	287	0.506405
	PVPALQSKMTLDQQH	Q2KHR3	939	0.506413
	EIAAFQRKRRSGSNG	Q2M1P5	890	0.506425
	KSKKKKKKSNHQEFE	Q15361	338	0.506447
	EETPVDKKPEVHEKA	Q96JQ2	654	0.506454
	LMNPSQKKKRKHRLW	Q92800	493	0.506455
	PTGLGQPKRRGRPPS	Q9UIF9	1405	0.506456
	HATENKVKNLTEEMA	Q9Y623	980	0.506469
	TRRLQRSKRISDSEV	Q9UQ26	965	0.506484
	NEIVDAHKEKIKEVI	Q8WXX0	473	0.506493
	PTRGSFHKEQRNPRR	P79522	125	0.506496
	DLRAENQKTKEKCDK	A0MZ66	33	0.5065
	PGYLAITKKVAVPYS	P16870	433	0.5065
	RPQRATTKVHSDDSD	O60303	832	0.506503
	EEKRNLRKIVDKEKS	Q6UXY8	384	0.506514
	IKQKQRRKFMAKPAE	Q03188	424	0.506519
	NKRKQETKSLKQKEA	Q9UIF9	743	0.506521
	PEEPQSRKKLRMEAS	P61244	153	0.506525
	KAEGKVRKEREYVIP	Q5RHP9	433	0.506529
	DFPAYCTKEKLPCIL	O14795	1166	0.506536
	TTTTTVTKLSTPSTG	Q12830	1760	0.506538
	SLGKVGVKEELLAVG	P46013	1643	0.506548
	AFMGPLKKDRIAKEE	P39023	394	0.506548
	LEKRLQVKQNQHEEL	Q8NHH9	270	0.50655
	AVQPHLRKCFENIAR	Q9P2D7	1355	0.506552
	LGDIDSEKDSLNIVM	O94830	375	0.506554
	AVFYNGKKFKLQSFE	A0AVI2	1637	0.506558
	IDYGIFGKEQQLAFL	Q8NEV8	1891	0.506562
	VFPWFSVKKSRFWEP	Q03164	1772	0.506563
	QLYRYVTKLLVAAAA	Q9H553	413	0.506563
	SKDLKFVKMRNTFGS	Q9BQI6	281	0.506565
	SIVLLLSKNAGLMQE	O95714	1147	0.50657
	VYGKKNIKLEPVPLK	Q13045	631	0.506574
	ILKGLNLKVQSGQTV	P08183	416	0.506588
	KVPKVDLKGPEIDIK	Q8IVF2	1427	0.506624
	LEMLKMAKPPSDIQE	Q8WXH0	6581	0.506625
	RGQQPVAKAEGSPTA	Q08345	410	0.50663
	KQAYLDFKGDMDQIM	Q8WXX5	138	0.50664
	DGYLYSCKYCDFRSH	Q9H4I2	80	0.506641
	ILREVHLKFLLTGLL	Q9BZH6	453	0.506649
	EDPRTKTKMSAAQAL	Q15149	4504	0.506652
	YWEFLFSKKDKELGD	O15050	2451	0.506659
	GDRFWWQKRGVFTKR	P11678	654	0.506667
	EQCRSSPKSMICCNK	A0JNW5	481	0.506671
	KIAAGIFKHLKESHL	Q5VW32	155	0.506673
	KPPGGFGKTSGTPAV	Q5TCZ1	959	0.506677
	SYSIYVYKVLKQVHP	P06899	44	0.506683
	EEERHMPKRKRKQHY	Q8NFC6	2770	0.5067
	NEFVALKKDVDAAFM	Q9NSB2	272	0.506708
	SRLEQALKQAEVFRD	Q9UPN3	6769	0.50671
	GSFTLKEKMKDVLHQ	Q2LD37	2813	0.506716
	VAEYTGPKLFKEPSS	Q5T5Y3	1465	0.50672
	DLAASDLKGFQPQAY	Q9Y6X0	175	0.506721
	LLSKVEEKVGSPERP	O95251	503	0.506723
	LAKVELEKRQLQERF	O75116	669	0.506726
	TQLVRASKDLAQTSY	O60563	168	0.506726
	SRDASEDKSAEKRKK	Q53F19	196	0.50673
	EAEEAEKKQSELDKV	Q5VUA4	969	0.506734
	KALESCLKGPDTYNS	P21359	2280	0.506735
	KGKRDRKKRVYDYES	Q8NDH2	2346	0.506736
	PLNPRGIKPQKDPDM	Q2NL82	317	0.506753
	WRACEAAKKTKADDR	O60563	265	0.506761
	HWKESDRKDGKKDQD	P23588	562	0.506766
	SDFENSMKRYLVQSV	Q6ZR08	153	0.506774
	RQTPFAEKLARTQAV	Q8WXG6	541	0.506776
	CSAVKTEKTPQEKLR	Q9UPN3	3322	0.506776
	QNQNTGSKKRFENHF	Q9UBS3	134	0.506779
	PVLEMYSKLRDQMKT	Q9Y2D4	146	0.506784
	QTSEGHEKMSSNTEK	Q6P4F7	212	0.506788
	EEEKRKQKSVKNHSL	A6H8Y1	384	0.506788
	LLRLLITKGAKVNGR	Q99549	623	0.506792
	TSAIFEFKEVLSNSE	Q68DQ2	733	0.506805
	AQVEEEGKRRAGLQA	Q92817	984	0.506811
	AQSGSESKVEPKKCE	P0DJD0	1580	0.506815
	DQAWKTLKERESILK	O75528	421	0.506833
	ILALERLKEAYSVKS	Q6P2Q9	847	0.506834
	EDFRKLWKTPPREKA	Q86XL3	540	0.50684
	WLAKLYRKNLNGILA	Q96L91	1108	0.506847
	RQRLIGPKGSTLKAL	Q13601	168	0.506849
	DEKNKLQKEKALRRD	Q9BQG0	816	0.506856
	KSKQQLEKISLLTDS	Q5VT06	2750	0.506864
	PENVREEKIIEHFKR	Q96T58	21	0.506865
	GRQIYDPKYCPQGTV	Q99439	272	0.506866
	SPEELKEKQKKVERI	Q9Y2H5	947	0.506867
	RVKEVVKKHSQFIGY	Q58FF7	183	0.506877
	KAIFAGYKRGLRNQR	P18077	15	0.506904
	QGFDLMNKFLTYFPG	P21127	702	0.506904
	CTACLTGKYPVELEW	Q06203	510	0.506904
	DALSWEDKLNRIMAL	Q14204	1526	0.506919
	QSQLRKKKYLEDIES	P0CG39	638	0.506922
	KHPGLILKYSTYKNL	Q9Y6J0	89	0.50693
	PPDCDPDKDHPGSSV	Q99250	1735	0.506934
	IRAHQRVKFTKDHTV	O15164	195	0.506935
	EGSGPTKKKAKLHAA	P78563	128	0.50695
	GGASELAKRKVKKKK	Q6ZQX7	82	0.506954
	LKFTKDGKFRKFGFI	Q9Y4C8	40	0.506955
	TEGQAAKKQKLEQAS	Q9BSV6	124	0.506962
	STSVLRYKKQVEVLA	Q96QE3	162	0.506963
	ILDIIGDKFCQLVTS	Q15652	1812	0.506979
	RTVQLVWKTLPPFEA	P40189	352	0.506979
	SSVQQHLKSPDHIKG	Q5BKZ1	426	0.506986
	NLLRPLLKDAAHPSE	Q9H9Q4	85	0.506987
	SPFLPSMKMQKVMPT	Q8NFD5	1566	0.506988
	YVIAKNKKVGLLYRL	Q93086	28	0.506989
	SIQTAIAKKYIRYEK	Q5K651	820	0.506992
	LSEETSVKSDYLSSG	P19525	173	0.506995
	RNRGASSKRDGTSSQ	Q8WVS4	305	0.506996
	YKGQQIGKVVQVYRK	Q9UNX3	69	0.507001
	ILQKQGFKFKLNTKV	P09622	271	0.507004
	PDLVNVIKDVSPPPL	P09884	530	0.507006
	HSCDLCGKGFRLQRM	Q9BRP0	126	0.507008
	VEDSPMLKSPFAGSG	Q5VT97	476	0.507017
	SSLKTAGKSEPSSKL	B2RTY4	2408	0.507025
	MTQALRRKFQLAHPR	Q96HE9	336	0.507031
	LLRYAGKKRRLQPDL	Q9P225	1990	0.507035
	CPNRVVQKGIRYDLC	O43463	239	0.507038
	KTSLECLKVLTGHTG	Q9UKB1	274	0.50704
	PGQNSFSKSTNSSDV	O75717	889	0.507049
	DSPQSLSKFYAGLKE	Q99698	873	0.507058
	ALTYQQFKNCKDNLS	Q92817	756	0.507059
	QELCRKEKLTCKSIG	Q9H5I1	31	0.507063
	RLAKKEAKERKKREK	Q8WUQ7	177	0.507064
	KEHEGQDKPPGMIQR	Q8NDH2	789	0.507065
	TASKDSTKVAGAKRK	Q96CP2	53	0.507066
	LEANPGEKRKMTDSH	Q92831	428	0.507075
	EAAERAIKKMNGMLL	Q9H361	156	0.507078
	GVAWDSKKHTGYVGL	Q93009	209	0.50708
	LSHGAARKWFYKDPQ	O75420	476	0.507082
	LTRAQLAKQIFHSKE	Q6P0N0	248	0.50709
	MNSQSSVKPLPINPD	Q9NTZ6	295	0.507094
	SGSQPNQKLGHPEAL	Q15942	295	0.507101
	LRVQPHLKKCFEGIA	Q8TD57	1200	0.507114
	IQKIMQEKNPVHVIG	P17098	550	0.507136
	EDLVEDFKKKYEDEI	P12035	287	0.507137
	SVALAQEKPVENGGC	Q9P2B4	385	0.507152
	ALKAAFMKCGSEDTA	Q7Z2Z2	401	0.507157
	FEKRDFRKVVFCMDR	Q99615	160	0.507163
	TPALLHVKYATKIAS	P20929	5963	0.507166
	KVIERVSKETLNLLL	O75122	1211	0.507174
	LVVAVCTKREYATVM	Q6ZS30	647	0.507175
	PSLLTNPKTNIQKEA	P52292	348	0.507184
	DKLSPQGKRMFQKRW	Q8WZ64	497	0.507186
	VKISEKKKIAEKIKE	O75822	76	0.507191
	QPLHIFDKLHTSPLT	Q96BP3	220	0.507196
	RSSKRESKTRLEISN	Q92614	57	0.507202
	GWGYNDSKFIFNKKG	O00116	102	0.507206
	KKTEKKKKKRQDISV	O00566	669	0.507211
	PMNTPGVKIIRPLSV	Q709F0	580	0.507216
	TSHPPPSKVFVCDKP	Q96JQ2	349	0.507222
	DSAENRFKFSRLLDT	P27708	1050	0.507223
	PPLFTTLKSLYYNTE	Q6N069	330	0.507227
	LTATAKVKPKKLAFS	Q86W92	901	0.507232
	SFSEDQQKEKDQLGK	Q5T2S8	322	0.507233
	FSRRVEGKAQNHFEE	Q5T7W0	373	0.507239
	EITFDDHKNGSCGVS	O75369	2244	0.507245
	GGGSKKKKKRSRSRG	Q9H7N4	644	0.507248
	SYEDYADKPLEKPLK	Q9H8M2	22	0.507248
	ETKSQFEKFVRFCFI	Q6YP21	426	0.507252
	LAVGLRKKFGQYAGH	Q14008	354	0.507256
	FSQISILKELYEHMN	Q8NBF6	154	0.507259
	MHIDTVLKEIAKTVL	Q96JB1	724	0.507262
	IEKQALEKSKRSSKT	Q8WWI1	773	0.507263
	HQPDDKKKNRGFCFL	O43390	287	0.507267
	LDGKNRRKLAERSEA	Q9BVJ6	60	0.507272
	PDDDYWGKIPKCSLL	O95425	1582	0.507278
	QYVESFFKDPIVNFE	Q9BQF6	1005	0.507284
	CFRLYTEKAYKTEMQ	O43143	488	0.507291
	AVSDAERKAHELITT	O75081	515	0.507293
	KVYHENIKTNQVMRK	O75376	280	0.507294
	VDSTQDKKNKQKLPE	Q6UB99	1233	0.50731
	QAVEQYAKKVVDDTL	Q9UKA4	1545	0.507317
	RYPDPLIKVNDTVQI	Q8TD47	155	0.507319
	VSIHQVKKQSQLSLL	Q9UBF8	624	0.507321
	YQQSMDSKLSGRYRR	O00193	91	0.507341
	DDASEELKNYSKQFG	Q9BX84	666	0.507344
	FTTLKFSKGDHLYVL	Q9P0V3	78	0.507344
	DEDGLPEKLAQKNPM	P23246	462	0.507346
	AAGSSEPKAPWPKAT	O15417	2514	0.50736
	FVQKQTLKAHMIVHS	Q8N895	493	0.507364
	EVDDMIRKSTNLLLT	Q9Y2D4	528	0.50737
	YKEDYENKIKGKWSE	P20929	284	0.507379
	DAISVLEKEHDYRDE	Q9Y6G9	255	0.507393
	IYHLATSKSKSKSER	P51587	3015	0.507405
	LVFEYLDKDLKQYMD	Q00537	272	0.507406
	ENKSLIQKVDMVTEQ	Q03001	5042	0.507413
	NAISILGKPLPKSSW	Q8WZ42	21333	0.507424
	ITNSASGKSALLDEK	P35580	1724	0.507425
	VGIGKPSKVSECYVA	Q8WZ42	23355	0.507425
	KRGRPRKKSGGSGER	P48382	472	0.50743
	LGFCVHVKHPHKIIV	Q9UK58	199	0.50744
	DFSPSPEKLVKSGNP	Q5VWN6	1544	0.507449
	LHFFFLVKDYGSWLD	O95427	880	0.507455
	QEKMTLFKSLMDRFE	Q8WXH0	431	0.507458
	LRNRPKDKDKMKACY	Q3V6T2	1479	0.507478
	ADECEKSKNQVKEKY	P51587	345	0.507493
	LSKERENKMHFYDII	Q9H095	206	0.507494
	ALAHKEDKADTDTSC	Q6DN90	352	0.507498
	WHVLKKVKLGQSVSH	Q7L8A9	258	0.507505
	PPEKQKRKKKKMPEI	Q96FF9	218	0.507508
	NIEPSVMKISSNSFM	Q9BYW2	818	0.50751
	VELLVEDKGNQVYRC	O75369	409	0.507516
	AEVDHCDKDGMTPLL	Q9ULJ7	746	0.50752
	QVDLCSKKLERAEQL	Q8WXX0	2872	0.507523
	SRFMHIIKAQPFKDR	Q8IYU2	520	0.507525
	KLCGPYEKFICEQDH	Q92598	655	0.507526
	CVSCFEYKGKKVFER	Q96N67	1373	0.507527
	QSEEELQKRSFPDPV	Q86X10	1086	0.507527
	CTAELAAKSGPQVIP	Q9Y4K1	616	0.507528
	LYKKKTGKDVRKDNR	P11021	276	0.507532
	AGCVVRRKVVYLEEL	Q9UKN7	2915	0.507536
	LVDSRWFKQWKKYVG	Q9Y4E8	39	0.507538
	FLRDMCKKYGEVEEV	Q9UPS6	125	0.507546
	RSLRLSHKTRRTRHA	Q13009	35	0.507546
	RNLSLGAKSEIATDK	Q9H5I5	2545	0.507557
	TMKNLDSKVNIIPVI	Q9P0V9	200	0.507558
	DIAAYRAKGKPNSAK	P23497	839	0.50756
	HIPENCLKVVNEHYL	Q96DT5	3269	0.50756
	RKAAPKMKKVIGIIE	P49917	635	0.507562
	KENEKKAKSLEADLM	P35749	1683	0.507571
	VAKNQALKEAGVFVP	P53396	780	0.507584
	VVQTLVAKEKALRPV	Q96L73	2435	0.507587
	IHGSFTLKEKMKDVL	Q2LD37	2811	0.507592
	NSKEFLAKEESQIPV	Q03701	802	0.507596
	NQAIKEGKAAQTERV	Q86VI3	624	0.507602
	SRDKLGAKGDFPTGK	Q9Y2W1	551	0.507607
	VADKASEKAENRRFK	Q9P2P1	1811	0.507611
	TIEDILFKAKRKRVF	Q13888	40	0.507613
	SMDYIRTKDNDHFNA	Q96RL7	1923	0.507615
	VVLKTLWKHQFAWPF	O60885	76	0.507616
	MEVVSLLKKTDPQTG	P43304	254	0.507625
	NGLKNTPKILDDIFA	Q9Y4C1	905	0.507626
	GRYDPSVKPPFDIGF	Q8N4Q0	91	0.507643
	CDGAKGEKGEKGFPG	Q01955	48	0.507644
	RADALYQKHAGHTLL	Q8NC60	580	0.507661
	TAAEVSEKLHVAAET	Q96JB1	3663	0.507662
	IRKKEQEKRMEKKIQ	Q9H0G5	120	0.507663
	SYRTYSEKEGPEKKK	Q6UB98	103	0.507667
	IAVEGPSKAEIAFED	Q14315	2356	0.507674
	LQTRRRKKKRPGSTS	Q6RFH5	377	0.507682
	RAMTGLIKKHEAVSQ	Q8NF91	2387	0.507691
	WTHSHCQKVCPTICK	P06213	217	0.507695
	HDLQAHNKEIYTIKW	Q9BZK7	392	0.507705
	CCIEAHLKENAAYFQ	Q15149	856	0.507715
	TLFIRKMKRSSSEIK	P17948	784	0.507723
	ANRAKNIKNKPQVNE	O14782	366	0.507729
	IVLRRRRKRVNTKRS	P14416	221	0.507732
	ELAIALSKSEISEAA	P42566	890	0.50774
	RFLEQKNKLLETKWN	Q9NSB4	146	0.507746
	KYSLNMYKALLPQQS	Q6W2J9	219	0.507753
	IHQKTQEKIWEFKGK	Q7Z2Z2	799	0.507754
	LPRLCIRKFFPKKKC	P32455	228	0.507759
	AEKEKKIKEFLKIMG	Q8WWZ7	249	0.50776
	EYEYLGYKAGLYEAI	Q8IVL5	266	0.507772
	EIKLKITKTYMNGKP	O96028	130	0.507778
	DDHCQCQKGYIGTYC	P35556	168	0.507778
	IENPAGKKSGFVNVR	Q8WZ42	21783	0.507782
	SVIKAEEKRSCDMVF	Q96QT4	1786	0.507789
	EGAGWDRKNSCLVEA	Q9P225	4344	0.507792
	ETRVESFKLEQTVPG	O75167	304	0.507793
	PTLSQQQKSPEQQET	Q14624	224	0.5078
	ELFKEELKQIQEERD	O15042	212	0.507801
	LEVNENGKRRTPDRT	O75081	292	0.507807
	AEEEIMKKIRESYEN	O00425	346	0.507812
	VQDKEMLKKYGKSFR	O95747	258	0.507814
	ENIVKGDKESIKNLL	Q96GE4	94	0.507817
	VVHGSDLKDMTSEQL	P05023	671	0.507819
	PDIDLNLKGPKVKGD	Q09666	3101	0.50783
	KPLTLPPKPEKSSGS	Q9C0C2	1704	0.507832
	GGEKYNDKKRKEEKK	Q8NCM8	2836	0.507832
	TMEQALNKSNKLNMD	P20929	1738	0.50784
	PFATDQSKPVAVPEE	Q9BXB4	320	0.507853
	MALSVLLKRSQDVLH	Q7Z3U7	1613	0.507854
	PYDKCKDKYGKPNKR	Q7Z4V5	67	0.507855
	KPSDAMLKNGHTTPI	Q8IZ21	104	0.507857
	QGLQAKDKTGSSDPY	O14795	617	0.507864
	VTKSREHKEKHKTHP	O60563	507	0.507875
	ILFKAKRKRVFEHHG	Q6P1K8	44	0.507881
	GPEGARSKPGVGARG	Q9BY89	870	0.50789
	DGAFADFKQERPFGH	Q96JM2	1946	0.507897
	ACPFLREKRGKNITT	Q709C8	2165	0.507898
	KTRNMDMKRLIMVLA	Q9UGP8	244	0.507901
	AEVLEYTKDEQLESL	P05198	123	0.50791
	TLLSCSRKLHNLPTQ	Q6BDS2	497	0.507917
	YINQSVPKRPAGSVQ	P00533	1099	0.507923
	YKRSQCYKDAFRCFE	O15050	1810	0.507931
	ADQNLPQKFLSDAVQ	O60673	1676	0.507949
	NQDTGMRKPAQSGFA	Q8IVE3	1158	0.507952
	LQEIQCEKAQAKTAS	Q5BJF6	329	0.507959
	CNGKCKSKQLCRSQS	Q5TB30	505	0.507963
	TALHCYRKGLTFVSV	O00411	1142	0.507964
	GSYKGPVKMPSQAPT	O75882	1026	0.507964
	RLTVVGEKGYSMVRA	Q9UBL3	405	0.507967
	IASQIKYKQSAEMEK	P20929	6050	0.507968
	LAETAEEKDTELLDL	Q8NEY1	1135	0.50798
	KKNAEKEKQQRNQKK	Q9BXJ9	619	0.50798
	ISLCQTFKLPLTPVF	Q12769	1236	0.507986
	IRDKMKGKKKYDLES	Q9BXF6	200	0.50801
	ANGPVAKKAKKKASS	Q14978	77	0.508016
	FAQSTNLKSHILTHA	P25490	401	0.508028
	REAVALVKPVTSAPR	Q9UKN7	2641	0.508029
	NSNPVEDKDAVAFTC	P31997	160	0.508036
	QMRRKAMKQGFEFNI	Q9UHD8	294	0.508037
	RGREQQEKEGKEGNS	Q96ST3	1145	0.50804
	VRIHSGEKLYLCKAC	Q147U1	364	0.508042
	STEPILIKDPIDPPW	Q8WZ42	14905	0.508042
	AMIKKKTKSSKPSKP	P35251	1125	0.508048
	EECNETVKEKQKLSV	P46100	686	0.508053
	VVLHVSSKTTLQYRS	Q8IVL0	1130	0.508069
	TAEVEVKKAGYKIYK	Q96RL7	411	0.508069
	VWHRRDGKWQNVHFH	Q13554	649	0.508073
	YLEFNKYKYTASVLI	Q96NB1	67	0.508073
	NLTKLKFKEDDTRGI	Q8NCM8	162	0.508076
	FTVETACKEYKHSFK	Q02880	205	0.508076
	DLSGNDFKGGYFPEN	Q13045	21	0.508077
	FEQIYEVKYTGKVGK	Q96JB1	785	0.508077
	KFASFIDKVRFLEQQ	O95678	166	0.508078
	MILMYEEKAREKEKP	P55008	127	0.508086
	IDMDSKMKKMAELQL	Q8IVF5	654	0.508086
	PEPAIPPKATLWPAT	Q5T0Z8	654	0.508111
	KREHEESKRVLQELK	Q9HBM0	580	0.508114
	RRKFQKAKPNLGRAH	A6H8Y1	1686	0.508118
	LGTALYGKEKPLIKL	Q460N5	311	0.508123
	KELLALEKREVDVKE	Q92817	1065	0.508123
	KRNVEAVKGLRKHER	P12882	1842	0.50813
	VDFVEKEKEPNNEKT	Q9H4W6	97	0.508144
	CSDLNMLKKLKSAER	Q9BTF0	62	0.508155
	LHLDTPSKFLSKDKL	Q92547	825	0.508165
	MRHNWKLKHTVPENI	Q9H7T0	986	0.508165
	GELKPLSKEDLGLHA	O43597	168	0.508166
	LKEQLERKRKEAYER	Q96PY6	626	0.508167
	NLFLQCPKPTLQQIS	Q01860	254	0.508173
	EKEDLLKKQEGAVDT	Q14667	1745	0.508177
	KEMEQFVKKYKSEAL	Q9UGI8	180	0.50818
	DLLKLWNKIWCITFR	Q13315	486	0.508186
	EEFYRLKKIQEKKKI	Q9Y5K8	204	0.508188
	NDKGRLSKDDIDRMV	P54652	515	0.508198
	LYYEVRQKPSNTEDF	P46063	293	0.508222
	PKPYSQPKNSQDVLK	Q9UPQ0	545	0.508224
	SPDVSDYKEGRILSH	P38432	496	0.508225
	VHNLLDSKINTLLSL	P21359	2664	0.508226
	SGLQNDGKQLCPPGK	Q7RTT3	137	0.508227
	IYEEKKKKTTTIAVE	Q00341	294	0.50823
	QFVTDVMKPLQIENI	P61221	447	0.508232
	RVEDVLGKGWENHVE	Q14204	671	0.50825
	HALEEIKKFLIPDYN	O75525	153	0.508252
	RETAGDGKSIKAFKE	P46013	2037	0.508271
	TLGEKSGKGLKTCKS	P51608	334	0.508272
	PKIQQLVKEFFNGKE	P11021	376	0.508287
	GADGQEHKEDTFDVF	Q8IX01	1060	0.508297
	LRPKLNPKKARAYGP	P21333	282	0.508297
	GKTAAAGKVVVEELA	Q5RHP9	1402	0.508301
	KELSTPDKVLIPERY	Q9Y2H5	923	0.508314
	KVEETKRKESELLKG	O75150	647	0.508321
	TGRVVMWKMGIRNSF	Q8NEM8	524	0.508323
	MKGFYFAKLYYEAKE	P49792	34	0.508328
	FGPVVAPKPKVNPFR	Q15942	33	0.508356
	QNFTMPSKFKEIFSQ	Q9BX84	154	0.50836
	LVIIVQQKREADEQQ	Q9P225	3053	0.508369
	MDKCFPEKNKPGEIA	Q99986	293	0.508375
	ESLVDGVKNENFYIQ	Q99550	244	0.508383
	HLVFLQNKARREDFC	Q9H0W8	373	0.508383
	RKTHVSKKTLNPVFD	A0FGR8	846	0.508387
	ELYGTWRKAASLKSN	P36578	269	0.508398
	ICDDIHAKEKESNRR	A0JNW5	338	0.508403
	PRTPVPSKYIRFIFN	Q9UBF2	471	0.508403
	PRGLKGEKGEPAVLE	P13942	385	0.508406
	LYHQPDDKKKNRGFC	O60506	282	0.508419
	RGNNRGYKNQSQGYN	Q00839	796	0.508419
	FQNTYNLKDIAGEAI	Q06190	110	0.508426
	KKTKGSGKGDDKHQS	Q6ZQX7	99	0.50843
	ATEEDKAKNYEEALR	Q9UN37	23	0.508434
	FLQKYIQKETECLRI	Q13315	70	0.508434
	ICGLERDKFDNKTVT	Q14643	2628	0.508435
	RDIWSKEKTCDRLPK	O95803	590	0.508437
	LLEQMMRKKQAMHLD	Q9HAU5	734	0.508447
	KFVSDVEKEMETLVE	Q12986	1002	0.508448
	EKKEKTEKKFDHSKK	Q8NFC6	344	0.508448
	DENFPNSKIHLVTEE	Q9H0K6	575	0.508455
	PFVSPWDKKEEANQK	Q6P158	1103	0.508456
	LLFSKTYKLQERSDL	O15269	45	0.508465
	CTKCVRCKSCGSTTP	Q03164	1534	0.508474
	GRRKAKKKWRKDSPW	A2ABF8	402	0.508478
	VVRGFQLKLGKVSRL	Q9P0V3	565	0.508481
	VKILVPEKSLPCKVS	P54277	522	0.50849
	MEIYRPHKANAEEMT	Q13547	58	0.508492
	EQEGRQDKPMDTSVL	Q12888	390	0.508504
	YIVPCMNKHGICVVD	Q9GZT9	204	0.508505
	VDQPPEAKKPKIKVV	Q92598	585	0.50851
	VAAQGKAKKAAAAAA	P18669	253	0.508517
	DIDVSGPKVDVDVPD	Q09666	4687	0.508519
	KRISKTTKLNVSLAS	Q562F6	30	0.508521
	TSRFRKSKPKESTKN	Q6P158	289	0.508526
	TEQLLDCKQELEQME	Q3V6T2	278	0.508531
	PASAGKRKTEPSAWS	Q86UE4	316	0.508534
	LQEKLVCKMKGEGVE	Q86W92	290	0.508538
	IHASDSDKEANSLLV	Q9NYQ8	1794	0.508541
	LLLYLTSKSEKDAVS	Q14669	1174	0.508575
	SERASRNKAEKQKRD	P35579	1129	0.508581
	KSAEAFGKIVAERPG	Q13263	407	0.508582
	PVSDRVTKCCTESLV	P02768	499	0.508586
	LDRLYSRKIRKQLVH	Q9NR09	2230	0.508592
	KWKDVVTKCIKGHYQ	Q70EL1	336	0.508595
	GTTTVNRKPTLVQGL	O95714	3299	0.508596
	MACVGRTKECTIVPS	Q96T88	408	0.508601
	ANSGNAIKPVSFIRD	Q9P275	186	0.508601
	DQKGTEIKPGQNNPV	P25054	2739	0.508604
	PPPLISKKKLIARDD	Q14865	720	0.508604
	PSRPTKSKDAHVCGR	Q9NSC2	40	0.508604
	MYDAGQAKQELLQQE	Q96JN2	698	0.508614
	YFPETLDKLGKRLEE	Q8NCM8	326	0.508615
	GFCPTKRKLLTPAEE	Q9C0B7	238	0.50863
	ESSDDEDKESEEEPP	P35659	249	0.508631
	KPTKENWKNCIQLMK	P29144	1216	0.508634
	RRGQAGVKKHSQKWL	Q6ZQQ6	1090	0.508634
	RGLGPLFKSSPEPVA	Q9Y678	631	0.50864
	NFFNQKKKKKKTKKI	P20042	81	0.50864
	IELIRQNKRLDAVRH	Q7L5Y9	213	0.508643
	CNTTTDRKHADIFLE	Q14571	1469	0.508646
	DKNSVTAKLLLEKIQ	Q9UKJ3	1091	0.508648
	SGDHRHEKMRDAGDP	Q9BTA9	45	0.508648
	EKVSQHIKSAKLLIA	P46939	1745	0.508649
	QVIDMSVKSLTLKVS	Q96RL7	1647	0.508654
	VQLDETEKAFSHFWS	Q86YR7	303	0.508655
	KQEKSPVKTVPRAKP	Q5VWN6	447	0.508656
	NLQDLVYKNGQAGIT	O95347	68	0.508673
	QMRKKTMKTGFDFNI	Q9UH03	57	0.508674
	PDTDHMVKFVNGQML	Q8NAP3	452	0.508675
	GKVGESSKKSEIKEI	Q5VT06	2254	0.508677
	KRSRGNRKSLRRTLK	Q9Y613	1136	0.508697
	QVEQQIQKKYSQQVV	Q8WXH0	2616	0.508704
	ECDFEVGKEKMLKVK	Q9UIG0	126	0.508709
	LKCVMPNKTELLKPK	Q6AHZ1	1114	0.50871
	SLSKEPAKLNKILKA	Q6ZQQ6	2072	0.508715
	LMERSKEKGLPSVHA	Q9P0U3	485	0.508725
	LPSEAKLKLAGSSGR	Q99959	39	0.508727
	LQNTTSLKLARKVHE	O75691	1995	0.508727
	IQVTAIDKDTGRDGQ	Q9NYQ8	2824	0.508728
	LATPVDLKLKLIPIL	Q9NVH2	194	0.50873
	LQVGVATKSTVFLFA	Q8TD57	2485	0.508733
	MGSFIRLKQFLEKCL	Q53GS7	672	0.508734
	SPDDMSTKSDDSFQS	Q7Z5J4	567	0.508734
	LKRKAMTKKKELTLL	Q00059	145	0.508736
	YIQRKTGKRPTSAAG	Q8TF72	1096	0.508747
	LEEIPLIKSAYEEQR	Q14152	711	0.508772
	DRNTLPKKGLRYTPS	Q8IVL0	1424	0.508781
	EGPNGKWKTPKFKMP	Q09666	2370	0.508789
	YTITLENKLGSATAS	Q8WZ42	15391	0.508794
	GIYERIRKRELKTNE	Q6DN90	709	0.508796
	ELEENQMKRFHWEQD	Q9UG63	326	0.508806
	RGPQPALKSRQSVVT	Q8TE77	598	0.508813
	DLYGNCFKVTSLQSP	Q8NEM8	760	0.50882
	VQMENTLKEQKELKK	Q15075	910	0.508825
	FLAESKTKNAALQPS	O15417	272	0.508838
	GEMGLQRKETLFIPC	Q96IV0	477	0.508852
	QVRGRLQKPKPNAGK	A6H8Y1	710	0.508858
	KTIQDKNKEIERLKQ	P15924	1481	0.508858
	GAQDIQDKFSSILSR	Q9HCG7	714	0.508866
	QLMGLEKKFQKQKYL	Q9UMQ3	151	0.508867
	SEYMTGKKLPPGGIP	P25490	259	0.508869
	VLVTISGKKDKLRVY	O95819	985	0.508874
	VAEAILPKGSARVTT	Q96L91	1070	0.508882
	KTTPDIIKDWPRRKR	Q7Z2Z1	1683	0.508896
	LCMGLKAKVVVELIL	Q9BSI4	64	0.508903
	EVLAELRKRQAELKA	O75528	348	0.508905
	EAKVKYVKLARSLRT	Q9Y4G6	303	0.508909
	KKYSLPSKFSDFLLD	Q9UIG0	287	0.508913
	DQYEMPGKLDRVVQK	Q8WZ42	32942	0.508914
	SCLKTSLKVLTITNC	Q5TYX0	297	0.508918
	FYLAMKKKAVIWGLY	Q9Y485	1649	0.508934
	DSEQEAHKPGAGATA	Q9P227	1199	0.508934
	NADAGSRKGDEENEH	Q7Z4N2	801	0.508941
	SNFAVGYKTDEFQLH	P21796	174	0.508943
	KLAAHPRKGFPGSLS	Q8TEK3	1294	0.508945
	QISELSGKVLKLQHE	Q9Y4B5	711	0.50895
	AAGKQLRKESQKDRK	Q8NC51	72	0.50895
	QSVEEKDKEADEEGG	Q9NU22	4988	0.508956
	PTSYMTSKHLPEQPH	P31629	1181	0.508957
	LVTSFPNKELTDESL	Q14CS0	307	0.508957
	CEQTEEKKKLKRHLA	Q96P65	408	0.508969
	RFQAFVKKKMSSSVV	Q12802	2127	0.508977
	DLVQHFKKLSTQGQV	Q96Q15	1468	0.50898
	RPFSIETKDSTDISA	O75410	157	0.508984
	ELEEELRKARAEAED	O60271	475	0.508984
	KGKAITPKDNNKTLK	Q9H5I1	113	0.508986
	NISRRLSKLRVLPWS	O15050	1379	0.508987
	TDEPGIKKCLNPEEK	Q9BTF0	440	0.508992
	DLSHIPLKDPLLFKS	A0JNW5	944	0.509002
	EYTQKLAKSSQIIAE	Q8N8E3	816	0.509014
	TDPSLDMKEQSTRSS	Q9UQ35	1372	0.509022
	HHHVTSRKPQTERSL	Q96DY7	778	0.509034
	AQADYHRKALAVLEK	Q68EM7	225	0.509042
	KIEQPPSKDLQNLEK	Q9P225	1218	0.509046
	LVIFKREKELARKLE	P21817	4676	0.509052
	FRFYITTKLSNPHYS	Q9P225	3488	0.509064
	TDLLILFKDDYFAKK	P05455	185	0.50907
	DKAPPHSKIGLEKKR	Q9H582	284	0.509071
	EDDGEPSKGASPELA	Q8TED9	95	0.509074
	SSGRRKAKKKWRKDS	A2ABF8	400	0.509086
	NQKLQEEKHKSITEA	O75665	320	0.509103
	TQKYKEGKFRKTLLA	Q8WZ64	798	0.509123
	PPGMIQRKMCILFSK	Q8NDH2	797	0.509133
	NRTYVNMKQKPVWND	Q96DT5	2195	0.509137
	YAEKSTGKGDSCDSS	P46100	1070	0.509137
	CMNEDPAKRPKFDMI	Q13418	435	0.509139
	LVDDCEYKRGIKETT	Q15398	495	0.509144
	LEKKCGQKLVSRALG	Q9ULI1	656	0.509149
	MIKGGGLKHVPCVED	Q9HAU5	1103	0.509159
	ENTRKYAKAETLMTV	Q96EE3	211	0.509159
	MCVGEKRKLIIPPAL	Q9NWM8	102	0.509162
	GAVLKWLKKEHLVDM	Q5K651	50	0.509163
	DGDEDYYKQRLRRWN	Q03468	462	0.509163
	APVQNKNKPNKKARV	Q03468	313	0.509166
	DSQGRSNKALHLKSD	Q5T3J3	560	0.509169
	PKGGWKCKWCVSCMQ	O14686	1472	0.509171
	VSEVYSGKTNSNAIT	Q99550	288	0.509193
	KKLIRYLKLKQQSPP	Q5XXA6	694	0.5092
	RVSSLNSKLSAQERK	O94762	103	0.509201
	HMVYLARKEGSSFAY	Q96IV0	543	0.509207
	SSSLERNKFYSFALD	Q96T58	1430	0.509208
	MFYEVWEKFDPDATQ	Q99250	1804	0.509213
	EDNCKEEKAQVANRP	Q9UKL3	1778	0.509223
	KCDPRLGKYMACCLL	A6NHL2	318	0.509229
	KNLDLLYKYIVHKTY	O43237	285	0.509232
	AQDPVFQKLKGQFTT	Q9Y4A5	3415	0.509239
	ISPLLSVKELRDMGI	Q8WVM8	63	0.509241
	RDRRQKGKKSCKETF	Q03164	2430	0.509243
	KSLPKNEKEDKENIS	Q9BVI0	218	0.509245
	LFDYKTEKYVIAKNK	Q93086	20	0.509247
	PSAVCAEKEEKHGKE	Q8NFC6	2430	0.509247
	SNSDVFSKYQLDKDG	P07237	195	0.509247
	YSQESWFKMPKFRMP	Q8IVF2	5191	0.509248
	SNDIKKRKVDDKDSS	Q04724	228	0.50926
	TRTISAGKVNLGAFR	Q92905	180	0.509261
	DNEWGSTKTGEQDGL	Q7Z5K2	950	0.509262
	FDKEWVAKQTKRMLD	P13073	140	0.509263
	VLMDASAKFKELGIQ	O95714	1753	0.509267
	EGKWKSPKFKMPEMH	Q09666	2822	0.509267
	LQNKIASKLQRPPSV	Q1MSJ5	895	0.509267
	TKSENINKDNYRARL	Q9UFH2	89	0.509269
	CDSETERKDPQNALA	O60284	257	0.509276
	SMREDLFKQYIEKIA	O14776	841	0.509281
	RRFILASKLKSEIKK	Q8IWB9	709	0.509284
	EDADFENKPMILLVG	Q9H223	61	0.509284
	AAEQGVQKPAAETPA	Q9Y6J0	1455	0.509284
	QGGKARAKSKSRSSR	Q96QV6	14	0.509299
	AQEEKRQKNERMAQH	Q9H2G2	1117	0.509301
	SKQSPQKKNHLVLEK	Q460N5	1415	0.509303
	DIETMEKKSVTFWCK	Q8WZ42	13676	0.509307
	EIVNNENKDVLIEFY	P30101	395	0.50931
	EVDIKGPKVDINAPD	Q09666	3583	0.509314
	ERKIQKHKTLPKMSG	Q07021	100	0.509316
	WSLLSSEKGPSLSSG	Q9UKL3	1386	0.509316
	EYHIAYLKEVEQLRM	P51114	359	0.509318
	VRYVNAFKFMSLERI	P17948	1218	0.509323
	EKIVDMYKGKKRHEM	P35749	143	0.509323
	TQTNPNIKKKATAED	Q8IYA6	456	0.509326
	KLDLKGPKAEVRVPD	Q8IVF2	3589	0.509329
	ETNKPHSKSKKRHLD	Q14669	110	0.509332
	QEVLIKVKHFMKQHI	Q709F0	387	0.509334
	DVLEGFKKKYEEEVV	Q9NSB2	251	0.509339
	GGQPEIKKANSMVKS	Q03164	1749	0.509367
	TLRDLQNKSSSCSSP	Q9UJY5	461	0.509369
	RLITSGCKVKKHETQ	O75410	468	0.509378
	ARKQSAQKRVLLQAS	P57740	30	0.509379
	NDTKAVIKALDEKIA	Q13823	598	0.509383
	LWSTVKTKRDTVKGY	Q8WWX8	51	0.509389
	EPFQLLSKIIGEESG	Q8IWB9	307	0.509391
	LALDLLEKAFKQNER	Q9BX84	682	0.509392
	IAEDEEWKRIRSLLS	P24462	127	0.509398
	ERRNLVLKESQRASQ	Q96Q15	3291	0.5094
	FLQFQGKKNMTLAGR	Q6GYQ0	608	0.509413
	TVDSEAEKAENEDRT	P52739	610	0.509413
	PDGKQEAKPQQAAGM	Q13428	1248	0.509417
	RDKWSSVKASLTRIA	Q86YR7	115	0.509422
	EEKAPVKKSIRDTPA	P06748	194	0.509428
	DLHQKLGKAIELEAI	Q8IVI9	91	0.509429
	TNSALRYKGKGTGKP	Q92560	419	0.50943
	RSCREDQKPVMDDQR	P04233	14	0.509436
	DKLRTSFKTITSIPE	Q96DT5	2366	0.509451
	PMSSPEMKSAPKKSK	P51610	2024	0.509464
	RQAQEEAKGALLGTS	O43293	400	0.50947
	DLDYKEAKCNKEKLQ	P51587	692	0.509478
	DVISAAKKIAEAGSR	P35221	748	0.509479
	PKKQVVAKAPVKAAT	Q14978	251	0.509485
	GQTLVAKKAVVIKQE	Q9ULH7	665	0.50949
	RSLPRPSKSNSRNGA	Q8IVL1	1221	0.509492
	IINYVVQKRDAERKS	Q8WZ42	20752	0.509507
	GSVDETPKMSAGQML	Q96Q15	2953	0.509516
	ITVREEEKLELQKLL	O75643	1034	0.509518
	RVEELDRKYYEVKNK	Q9UQE7	454	0.509522
	EQLSDEEKVRIAAKF	P47755	13	0.509526
	ELVKKLEKQNEQLRS	Q9P270	26	0.509528
	KLAVKPKKQRVSKKH	Q6ZU35	167	0.509537
	KMQKRADKIASKLSD	Q9NVN8	557	0.509541
	AYADIMAKSCHDEED	Q92736	3697	0.509543
	APEALQKKPEDTNRR	Q13418	364	0.509547
	RRERDEKKNADLNAQ	Q9Y520	1515	0.50956
	VVVCVSKKLSKKQSE	Q92547	915	0.509563
	KPETLIKKRKARSLL	Q8TEQ6	842	0.509564
	LNAQESMKNTEDERK	Q8WXH0	2428	0.509577
	INTFYSNKEIFLREL	P07900	41	0.509579
	LTVITPVKKKRGRPK	Q9Y6X0	584	0.509586
	FNSEEDAKAAKEAME	P19338	624	0.509589
	CNQSMNLKRHMLRHT	Q8N8E2	460	0.50959
	KNVPGKMKVAPLFLV	Q96QE3	793	0.509591
	VEHKQRPKVELMPRM	Q13045	756	0.509591
	IINYCNEKLQQIFIE	O43795	410	0.509593
	PDPPPRPKPVKMKVN	Q6ZRS2	988	0.509602
	STSSTSDKDDDDDDS	Q9UPS6	1104	0.509603
	TQDIIMSKLDRRRKG	Q8TD57	2119	0.509607
	NVAFMESKRMKVEKM	O95425	1391	0.50961
	QVTKIWRKVAEKEKA	Q9BYX2	484	0.509618
	EKENARKKMETEAEL	Q9UL16	413	0.509649
	NVTIQKQKRRSVNSK	Q99661	92	0.509658
	VNQTDKEKEKVAVSD	Q8IVL0	1201	0.509658
	RQRLTQSKIKENRQQ	Q96GE4	655	0.509661
	PWEVQWLKLEKMINT	Q9NZN9	224	0.509661
	VTRVSEVKPKMVVAT	P33993	174	0.509672
	LNEDKLEKLEELTMD	O00567	230	0.509678
	KALPGQLKPFETLLS	P09211	128	0.509685
	EEAEKFAKTVVDVGE	Q86TV6	456	0.509695
	GKSDSLEKIERRVQA	Q5TCZ1	928	0.509706
	HVVLDMAKVADTILF	Q2NL82	151	0.509711
	QNVLRLQKEEEIEFL	P41252	672	0.509726
	KLSPVTYKLQPGNKP	O60673	820	0.50973
	SQWQQESKEKVVSLL	Q5PRF9	76	0.50973
	EELLLDWKIWSKAEQ	Q99698	1922	0.509745
	AAVRCIRKEIRDLYV	O00442	220	0.509753
	SKSLAKLKNKHEAMI	P35579	1022	0.509757
	KGDKTKRKNDGSAVS	Q7Z6E9	1022	0.509759
	EAYLRRIKMELQQKD	Q92974	594	0.50976
	GAICVNSKEPEVLLE	Q9UKU9	74	0.509773
	HPVSTMVKGLYGIKE	P07864	278	0.509774
	DTEYSFLKEVRNCLT	Q63HN8	3360	0.509775
	PGYLPREKFLRTAEA	Q8NC60	163	0.509779
	KDKVSLTKTPKLERG	Q6UB99	38	0.50978
	SYTEDDKKASPEHRI	Q13415	309	0.509785
	KFSMPGFKAEGPEVD	Q09666	891	0.509787
	SVPQCLSKTQQKSRE	Q9HBM0	415	0.509797
	MSMTGAGKSPPSVQS	A2ABF8	196	0.509799
	EERSKKRKKSKSRSR	Q14498	36	0.509807
	SLDLVTMKKLDSKVN	Q14141	171	0.509816
	TYEIEDEKRRRKSVE	P15924	1122	0.509822
	IEAIKESKNGKKIGV	Q9Y5B9	129	0.509839
	ETTYSKKKIIDFLSA	P52701	854	0.509843
[truncated: 13,963 more rows]

## Sheet: Table 5
Supplementary Table 5. ProtDCal features included in base SET8 ML model construction.
ProtDCal Feature	Description
Gw(U)	Free energy contribution from the entropy of the first shell of water molecules in an unfolded state
W(U)	Number of water molecules close to the residue in its unfolded state
Mw	Molar weight
HP	Kyte-Doolittle's Hydrophobicity Scale
IP	Isoelectric Point
ECI	Electronic Charge Index
L1-9	Distance between the terminal groups of (A)4-X-(A)4 at optimized conformation (X = amino acid)
DHf	Enthalpy of formation of the peptide (A)4-X-(A)4
Z1	Composed parameter related with hydrophobicity
Z2	Composed parameter related with steric features
Z3	Composed parameter related with electronic features
ISA	Isotropic surface area
Xi	Torsional angle between N-C(alpha) bond of the first amino acid and the C(alpha)-C(O) bond of the last amino acid of the (A)4-X-(A)4 peptide
Ap	Molecular area of non-carbon atoms in sidechain
Pa	Levitt's probability of adapting an alpha-helix conformation
Pb	Levitt's probability of adapting a beta-sheet conformation
Pt	Levitt's probability of adapting a beta-turn conformation

## Sheet: Table 6
Supplementary Table 6. Base SET8 ML model predictions for the surface exposed human proteome, isolated for the top 500 predictions. Annotated to include ML score, and SET8 methylation score as determined in vitro with peptide arrays.
Array	Spot #	Peptide	ML Score	Uniprot ID	K Pos	Methylated by SET8 (0=no, 1=yes)	Annotation
a1	378	RYEECKEKLVPFLKK	0.999999	Q8IYD1	369	0	Q8IYD1_369(m3_s2 : 0.8448439601582645)
a1	435	LYHQPDDKKKNRGFC	0.999999	O60506	282	0	O60506_282(m3_s2 : 0.8433322474233954)
a1	275	AARICANKYMVKSCG	0.999996	Q96L21	74	0	Q96L21_74(m3_s2 : 0.8485853811549807)
a1	181	VNFAEFSKKCSERWK	0.999993	O15347	43	0	O15347_43(m3_s2 : 0.854850309181445)
a1	83	QAVLLPKKTESHHKA	0.999989	P0C0S8	120	0	P0C0S8_120(m3_s2 : 0.8646015922423645)
aM	1	SAKKTPKKAKKPAAA	0.999983	P16403	157	0	P16403_157(m3_s2 : 0.8845621330216046)
a1	279	FKVEDAIKVLQCHKP	0.999983	Q8NFP7	127	0	Q8NFP7_127(m3_s2 : 0.8484598716833741)
a1	76	RPSTGPHKLRECLPL	0.999983	P22090	37	0	P22090_37(m3_s2 : 0.8652853874314371)
a4	935	SAKVFIDKQTNLSKC	0.999983	O95319	458	0	O95319_458(m2_s2 : 0.8320174762500128)
a6	1198	LFDEYGSKKSDYIKL	0.999979	P14625	404	0	P14625_404(m1_s2 : 0.999979194977902)
a1	492	LNYGLYRKMEIYRPH	0.999976	Q13547	50	0	Q13547_50(m3_s2 : 0.8412586951267865)
a4	1142	REIVRDIKEKLCYVA	0.999976	P60709	213	0	P60709_213(m2_s2 : 0.7990206447756616)
a6	1199	KRHTPLSKLMKAYCE	0.999976	P61956	42	0	P61956_42(m1_s2 : 0.9999756292013556)
aM	24	KKKKNNIKLYVRRVF	0.999967	Q58FF7	296	1	Q58FF7_296(m1_s2 : 0.9999671835155648)
a1	59	VKVVSSPKLAPKRKA	0.999965	O75152	665	0	O75152_665(m3_s2 : 0.8676391715760124)
a1	57	MVVPAALKVVRLKPT	0.999965	P40429	125	0	P40429_125(m3_s2 : 0.8691145830718542)
aM	26	EKVFLAQKMMIGRCN	0.999961	P30613	354	1	P30613_354(m1_s2 : 0.9999613792188422)
a4	1176	ESKVFYLKMKGDYFR	0.999951	P27348	120	0	P27348_120(m2_s2 : 0.7958632639831912)
aM	28	STLEPVEKALRDAKL	0.999935	P0DMV8	319	1	P0DMV8_319(m1_s2 : 0.999934560246866)
a1	529	RLKNNQSKFFRVLNG	0.999927	Q12873	894	0	Q12873_894(m2_s3 : 0.8228159749699802)
a7	32	QFFICTAKTEWLDGK	0.999919	P62937	118	0	P62937_118(m1_s2 : 0.9999194038787004)
a7	33	DVSVDEVKALASLMT	0.999919	P00367	162	0	P00367_162(m1_s2 : 0.999918796673934)
a6	855	VEVTLSYKSKQFCKG	0.999911	Q9H4W6	331	0	Q9UH73_330(m2_s1 : 0.7766650622000921)
a1	252	FVIGNGNKPWISLPR	0.999905	P22090	233	0	P22090_233(m3_s2 : 0.8496787233913425)
a7	34	LQDFFNGKELNKSIN	0.999902	P11142	357	0	P11142_357(m1_s2 : 0.9999022766864568)
a6	1017	RNCAAYLKLRHWQWW	0.9999	P35580	828	0	P35580_828(m3_s1 : 0.8745853004344486)
a6	1054	RNCAAYLKLRNWQWW	0.999892	P35749	828	0	P35749_828(m3_s1 : 0.8723717164632968)
a1	35	KKAAGAGKVTKSAQK	0.999888	P68104	450	0	P68104_450(m3_s2 : 0.8760146568932098)
a1	104	IQAVLLPKKTESHHK	0.999887	P0C0S8	119	0	P0C0S8_119(m3_s2 : 0.8622248654300253)
a7	35	TTVKFVVKMTEEKLA	0.999886	P11388	971	0	P11388_971(m1_s2 : 0.9998855538735)
a1	91	KLKEKYEKDIAAYRA	0.999882	P09429	157	0	P09429_157(m3_s2 : 0.8637486103726723)
a7	36	NSTANLVKTIKALDG	0.999878	Q9Y490	1541	0	Q9Y490_1541(m1_s2 : 0.9998784376286838)
a1	474	RNISFNDKKFVIKPI	0.999877	P15311	253	0	P15311_253(m3_s2 : 0.841941810096419)
a7	37	MTDRGSGKKRGFAFV	0.999873	P09651	144	0	P09651_144(m1_s2 : 0.999872924867516)
a1	223	RTKIDWNKILSYKIG	0.999873	P52907	273	0	P52907_273(m3_s2 : 0.8515397703536822)
a6	1034	KMIYASSKDAIKKKF	0.999867	Q9Y281	121	0	Q9Y281_121(m3_s1 : 0.8735964366876886)
a1	32	LKRVAAPKHWMLDKL	0.999866	P62701	16	0	P62701_16(m3_s2 : 0.878641178377958)
a7	38	EYCVQQLKEFDGKSL	0.999862	P08238	526	0	P08238_526(m1_s2 : 0.9998622594002924)
a4	972	ESKVFYLKMKGDYYR	0.999861	P61981	125	0	P61981_125(m2_s2 : 0.8221650357776)
a4	1069	HTGEKPYKCEECGKA	0.999856	Q03936	230	0	Q03936_230(m2_s2 : 0.8059250462396121)
a2	651	LPHCRTMKNVLNHMT	0.999851	Q09472	373	0	Q09472_373(m2_s3 : 0.7263796918786024)
a6	1048	GIEIPAEKVFLAQKM	0.999847	P30613	348	0	P30613_348(m3_s1 : 0.8728422673166254)
a7	39	RLASYLDKVRALEEA	0.999844	P02533	132	0	P02533_132(m1_s2 : 0.9998436132011932)
a7	40	DVLEVTKKFMRDPIR	0.999837	Q14240	227	0	Q14240_227(m1_s2 : 0.9998367825279152)
a1	458	NISFNDKKFVIKPID	0.999832	P15311	254	0	P15311_254(m3_s2 : 0.8423530981516074)
a7	41	QLKEFEGKTLVSVTK	0.999831	P07900	539	0	P07900_539(m1_s2 : 0.9998313686628204)
a6	765	ERVKNFLKEAKLTDQ	0.999831	Q00610	764	0	Q00610_764(m2_s1 : 0.7833876502445712)
a2	659	YYHLLAEKIYKIQKE	0.999829	Q09472	636	0	Q09472_636(m2_s3 : 0.7244796898954964)
a5	78	PTNAEVLKVLGNPKS	0.999824	P60660	50	0	P60660_50(m2_s2 : 0.79043468582291)
a7	42	KVDWLTEKMHARDFT	0.999815	Q14240	292	0	Q14240_292(m1_s2 : 0.9998153290179246)
a1	190	RWKTMSAKEKGKFED	0.999813	P09429	55	0	P09429_55(m3_s2 : 0.8533919462954334)
a1	61	TVAVGVIKAVDKKAA	0.999809	P68104	439	0	P68104_439(m3_s2 : 0.867293813746786)
a6	759	GRKQLLEKWLKEDKL	0.999798	Q00610	450	0	Q00610_450(m2_s1 : 0.7835622892734041)
a4	1164	REMLQQSKILKVIRK	0.999776	P07900	407	0	P07900_407(m2_s2 : 0.7967726939304294)
a7	43	KFDLMYAKRAFVHWY	0.99977	Q71U36	401	0	Q71U36_401(m1_s2 : 0.9997695050386932)
a1	251	KMPEMNIKAPKISMP	0.999762	Q09666	2575	0	Q09666_2575(m3_s2 : 0.8497130937118751)
a7	44	SANMPWFKGWKVTRK	0.999758	P68104	212	0	P68104_212(m1_s2 : 0.999758149665386)
a1	359	SLEGPEGKLKGPKFK	0.999753	Q09666	1177	0	Q09666_1177(m3_s2 : 0.8457765425602737)
a6	769	ALPEFDGKRFQNVAK	0.999748	P14625	586	0	P14625_586(m2_s1 : 0.7830095681871352)
a1	554	FRGRMSMKEVDEQML	0.999744	P07437	324	0	P07437_324(m2_s3 : 0.7845526837798077)
a1	141	ELNKLLGKVTIAQGG	0.999733	P0C0S8	100	0	P0C0S8_100(m3_s2 : 0.8581536272631795)
a7	45	EKALRDAKLDKAQIH	0.999718	P0DMV8	325	0	P0DMV8_325(m1_s2 : 0.9997179615903778)
a1	108	IIKRFEQKGFRLVAM	0.999686	P22392	31	0	P22392_31(m3_s2 : 0.8620008627297479)
a4	968	INTFYSNKEIFLREL	0.999683	P07900	41	0	P07900_41(m2_s2 : 0.8227382369861073)
a6	1020	YHQPDDKKKNRGFCF	0.999663	O60506	283	0	O60506_283(m3_s1 : 0.8744560806905477)
a7	46	RCQYVTEKVLAAVYK	0.999649	P09972	208	0	P09972_208(m1_s2 : 0.999648707530427)
a2	895	NLCAIHAKRVTIMPK	0.999648	P68431	116	0	P68431_116(m2_s3 : 0.6500610868633545)
a6	992	GVSLAALKKALAAAG	0.999639	P16403	63	0	P16403_63(m3_s1 : 0.8767830954779157)
a6	1126	GPSKKTAKLHVAVKV	0.999609	Q12906	454	0	Q12906_454(m3_s1 : 0.8678323795490414)
a4	999	HRLYQQIKAGAYDFP	0.999595	Q9UQM7	226	0	Q9UQM7_226(m2_s2 : 0.8166129071647903)
a6	764	APSTMKIKIIAPPER	0.999588	P68133	330	0	P68133_330(m2_s1 : 0.7834086658688499)
a5	136	DSKEDGRKFDFDACN	0.999588	Q15424	356	0	Q15424_356(m2_s2 : 0.7860478884586174)
a7	47	RIKEIVKKHSQFIGY	0.99958	P07900	209	0	P07900_209(m1_s2 : 0.9995803274014632)
a4	1159	GLFIIDDKGILRQIT	0.999577	Q06830	136	0	Q06830_136(m2_s2 : 0.7971443206143384)
a6	1090	NDKKFVIKPIDKKAP	0.99957	P15311	258	0	P15311_258(m3_s1 : 0.8703557019205148)
a1	413	KKLEDGPKFLKSGDA	0.999569	P68104	392	0	P68104_392(m3_s2 : 0.8439586080963656)
a7	48	DFEHRIPKEQWWLKL	0.999553	Q01813	747	0	Q01813_747(m1_s2 : 0.9995529236760138)
a4	969	HKLYQQIKAGAYDFP	0.999551	Q13554	227	0	Q13554_227(m2_s2 : 0.8225798575132981)
a1	404	EAIKQLRKLQAQMKD	0.999544	P35749	1649	0	P35749_1649(m3_s2 : 0.8440733895789189)
a6	1125	ERVLIPVKQYPKFNF	0.999518	Q07666	165	0	Q07666_165(m3_s1 : 0.8679018680272524)
a7	49	LPEDEEEKKKQEEKK	0.999488	P07900	558	0	P07900_558(m1_s2 : 0.9994875877097986)
a6	1195	IKTLEEIKSKKMKEK	0.999487	O75152	221	0	O75152_221(m3_s1 : 0.8650196099129447)
a5	84	IQRVCQEKQVDYEIN	0.99948	Q96IZ6	66	0	Q96IZ6_66(m2_s2 : 0.7899262332245574)
a1	464	DIEGPEGKLKGPKFK	0.99948	Q09666	4501	0	Q09666_4501(m3_s2 : 0.8422370190207383)
a5	74	FNGKELNKSINPDEA	0.999459	P11142	361	0	P11142_361(m2_s2 : 0.7908003888316448)
a6	990	NIEGPEGKLKGPKFK	0.999433	Q09666	2689	0	Q09666_2689(m3_s1 : 0.8769757920970683)
a1	183	PVSELITKAVAASKE	0.999424	P10412	46	0	P10412_46(m3_s2 : 0.8544672233911073)
a7	50	VGDEAQSKRGILTLK	0.999386	P68133	63	0	P68133_63(m1_s2 : 0.9993862693479014)
a7	51	KKYDEAIKCYRNALK	0.999384	Q9BXJ9	101	0	Q9BXJ9_101(m1_s2 : 0.9993837484875012)
a1	255	PEELVDYKSCAHDWV	0.999384	P22392	143	0	P22392_143(m3_s2 : 0.8496400724300146)
a2	687	NQLKFRKKKLKFCKS	0.999377	Q9UPS6	1827	0	Q9UPS6_1827(m2_s3 : 0.7176228712316304)
a1	411	RGYVCAIKVEKFCCA	0.999371	Q08AF3	297	0	Q08AF3_297(m3_s2 : 0.8439744611226071)
a4	1085	RLLQAIAKDNIIPFL	0.999371	Q9UP95	535	0	Q9UP95_535(m2_s2 : 0.8037892370398543)
a4	942	YGKVVGAKVVTNARS	0.999366	Q15424	436	0	Q15424_436(m2_s2 : 0.8292542917484351)
a1	334	HVRKEHGKQMKKHPC	0.999307	Q9HCE3	1050	1	Q9HCE3_1050(m3_s2 : 0.846532241296277)
a6	709	DLKNLFSKYGKVVGA	0.9993	Q15424	428	0	Q15424_428(m2_s1 : 0.7879733674566869)
a1	357	MKTYIPPKGETKKKF	0.99929	P09429	82	0	P09429_82(m3_s2 : 0.8458545118841623)
a7	52	VPGGDLAKVQRAVCM	0.999288	Q71U36	370	0	Q71U36_370(m1_s2 : 0.999287549277235)
a6	677	ACKTGQIKEVERICR	0.999287	Q00610	742	0	Q00610_742(m2_s1 : 0.791678194707601)
a1	259	GLKSLVSKGTLVQTK	0.999285	P16401	93	0	P16401_93(m3_s2 : 0.8494506558414164)
a1	39	PKHWMLDKLTGVFAP	0.999277	P62701	22	0	P62701_22(m3_s2 : 0.8749255105043676)
a5	204	GQGTPKLKLKWKCKK	0.999268	Q9NVM6	174	0	Q9NVM6_174(m1_s4 : 0.9992684586783794)
a1	34	TYDREGFKKRAACLC	0.999261	Q9NZJ9	18	0	Q9NZJ9_18(m3_s2 : 0.8773941407029625)
a7	53	PPTRPTDKPLRLPLQ	0.999254	P68104	244	0	P68104_244(m1_s2 : 0.9992540293128596)
a7	54	KQEEKKTKFENLCKI	0.99924	P07900	567	0	P07900_567(m1_s2 : 0.9992402381022062)
a7	55	GEKPYECKECGKAFR	0.999236	Q9H7R0	436	0	Q9H7R0_436(m1_s2 : 0.9992356875118974)
a1	114	AALKFLAKCRKKKKL	0.999213	Q15051	433	0	Q15051_433(m3_s2 : 0.8612356307116222)
a4	1113	GEKPYECKECGKAFS	0.999208	Q9H7R0	491	0	Q9H7R0_491(m2_s2 : 0.8010635826544396)
a7	56	QKKEEILKTTCFICG	0.999202	Q14643	2616	0	Q14643_2616(m1_s2 : 0.9992022603127856)
a6	798	EKWLKEDKLECSEEL	0.999189	Q00610	456	0	Q00610_456(m2_s1 : 0.7811265804319528)
a7	57	EELEEAKKKLAQRLQ	0.999188	P12882	1395	0	P12882_1395(m1_s2 : 0.9991884273186056)
a7	58	ESLTDPSKLDSGKEL	0.999178	P07900	69	0	P07900_69(m1_s2 : 0.9991783150104157)
a7	59	WEGLNVVKTGRVMLG	0.999173	P15531	85	0	P15531_85(m1_s2 : 0.9991732837223288)
aM	30	QLFDQVVKTIGLREV	0.999157	P26038	35	0	P26038_35(m1_s2 : 0.9991572833033914)
a1	37	AVTKAQKKDGKKRKR	0.999133	Q8N257	25	0	Q8N257_25(m3_s2 : 0.8754356205521959)
a5	146	QTLWCSVKGFCRSKL	0.999121	P58397	504	0	P58397_504(m2_s2 : 0.7853936996483911)
a6	1027	SRIKLGLKSLVSKGT	0.999102	P16401	88	0	P16401_88(m3_s1 : 0.8740455654513118)
a1	504	FLKKLLGKKLTRCLK	0.999091	O43868	129	0	O43868_129(m3_s2 : 0.8409449458565791)
a1	140	HYRPKQKKKKKKKKK	0.999086	A8MW92	570	1	A8MW92_570(m3_s2 : 0.8582435956307423)
a1	211	GLVGEIIKRFEQKGF	0.999076	P22392	26	0	P22392_26(m3_s2 : 0.8523945208243446)
a7	61	SKFHRVIKDFMIQGG	0.999071	P23284	98	0	P23284_98(m1_s2 : 0.9990714163070746)
a1	101	DHYRPKQKKKKKKKK	0.999032	A8MW92	569	1	A8MW92_569(m3_s2 : 0.8623843223633224)
a7	62	AAKKGVVKAEKSKKK	0.999028	P09429	177	0	P09429_177(m1_s2 : 0.9990282003855157)
a5	53	EHYECEIKRLNKALQ	0.999014	Q96KP6	160	0	Q96KP6_160(m2_s2 : 0.792251666199171)
a1	521	HLKMPKVKMPKFSMP	0.999012	Q09666	2642	0	Q09666_2642(m3_s2 : 0.8403604465729874)
a7	63	EAREKETKALSLARA	0.999006	P35580	1484	0	P35580_1484(m1_s2 : 0.999005963221508)
a6	950	RGSSKSGKLKGDDLQ	0.999006	O60812	174	0	P07910_187(m3_s1 : 0.8803663378546052)
a1	480	WNKILSYKIGKEMQN	0.998973	P52907	278	0	P52907_278(m3_s2 : 0.8417769005746855)
a1	62	FVRVKPKKKKKKKKK	0.998969	Q9BVI0	543	1	Q9BVI0_543(m3_s2 : 0.8671192046183192)
a1	488	GTTKNDFKKLRKRKC	0.998961	Q96QE3	203	1	Q96QE3_203(m3_s2 : 0.8414534821225301)
a1	75	KYKDKRRKKKKKRKK	0.998939	Q66PJ3	297	1	Q66PJ3_297(m3_s2 : 0.8653924314477389)
a1	567	LRDIGAGKGKYYAVN	0.998931	Q13547	218	0	Q13547_218(m2_s3 : 0.7736745903467828)
a7	64	KKVLPLLKIIKKKNS	0.998916	P49792	614	0	P49792_614(m1_s2 : 0.99891578637652)
a4	1185	QLYSVDRKVSQPIEG	0.998914	Q00610	189	0	Q00610_189(m2_s2 : 0.7950008052724483)
a1	177	DPKKPRGKMSSYAFF	0.998908	P09429	12	0	P09429_12(m3_s2 : 0.8552589810661255)
a7	65	QEAFEISKKEMQPTH	0.998862	P63104	157	0	P63104_157(m1_s2 : 0.9988618110943712)
a4	1172	MYKTDLEKDIISDTS	0.998851	P07355	157	0	P07355_157(m2_s2 : 0.7959579387885216)
a5	232	WFHKSRRKKKRKKLC	0.998844	Q7Z570	596	0	Q7Z570_596(m1_s4 : 0.9988436284895162)
a7	66	NIEGPDAKLKGPKFK	0.99884	Q09666	4239	0	Q09666_4239(m1_s2 : 0.9988400876918326)
a6	1055	KQHYIDLKDRPFFPG	0.998838	P22392	56	0	P22392_56(m3_s1 : 0.8723224489722848)
a5	102	LAYTLGVKQLIVGVN	0.998824	P68104	146	0	P68104_146(m2_s2 : 0.7883154085497859)
a5	241	LQLKRELKKCQCVLA	0.99878	Q86VH2	483	0	Q86VH2_483(m1_s4 : 0.998779810780723)
a1	241	YRPKQKKKKKKKKKS	0.998771	A8MW92	571	1	A8MW92_571(m3_s2 : 0.8502029237577324)
a2	748	ALCCYHAKHCQENKC	0.998749	Q09472	1794	0	Q09472_1794(m2_s3 : 0.6939648050153144)
a7	67	FLTMMARKMKDTDSE	0.998722	P0DP23	76	0	P0DP23_76(m1_s2 : 0.9987215927107426)
a7	68	PEVMAKVKVLFVRNL	0.998721	O60506	338	0	O60506_338(m1_s2 : 0.9987206138754572)
a1	445	TKKKVSQKKQRGRPS	0.998718	Q9BPZ2	35	0	Q9BPZ2_35(m3_s2 : 0.8428899422003298)
a7	69	QLVHTGEKPFQCTFE	0.998703	O15391	309	0	O15391_309(m1_s2 : 0.9987033399905392)
a1	71	QGGKARAKAKTRSSR	0.998693	P0C0S8	14	0	P0C0S8_14(m3_s2 : 0.8656159941961592)
a5	252	KKCTDIIKQCIKKKS	0.998691	Q06190	251	0	Q06190_251(m1_s4 : 0.9986912105581722)
a7	70	NAAIATIKTKRTIQF	0.99869	Q71U36	336	0	Q71U36_336(m1_s2 : 0.9986900740029724)
a1	591	YHWHDGVKRFFKCPC	0.998629	Q7L590	811	0	Q7L590_811(m2_s3 : 0.7555900719501758)
a1	162	RAKKYLCKVKAACKI	0.998624	Q8IZT6	2954	0	Q8IZT6_2954(m3_s2 : 0.856097101446986)
a7	71	TRIPKIQKLLQDFFN	0.998624	P54652	351	0	P54652_351(m1_s2 : 0.9986239571792568)
a6	797	NEFVVLKKDVDAAYM	0.998618	P08729	199	0	P08729_199(m2_s1 : 0.7811365242806277)
a1	83	QAVLLPKKTESHHKA	0.998579	Q96KK5	120	0	P0C0S8_120(m3_s2 : 0.8646015922423645)
a7	72	KYEEVARKLVILEGE	0.998546	P07951	168	0	P07951_168(m1_s2 : 0.9985460416658096)
a6	619	KFASFIDKVRFLEQQ	0.998544	P05787	108	0	P35908_195(m2_s1 : 0.8035310069353054)
a5	257	KYMWTPSKQCGFCKK	0.998524	Q92576	718	0	Q92576_718(m1_s4 : 0.9985240514973948)
a1	170	PNDKHRSKKCKDPKP	0.998521	Q9ULH7	280	0	Q9ULH7_280(m3_s2 : 0.8556674188824633)
a7	73	GGLTGLNKAETAAKH	0.998511	P15259	100	0	P15259_100(m1_s2 : 0.9985109345345232)
a1	487	YRVWIQCKYCKPLLS	0.998496	Q6P1Q9	368	0	Q6P1Q9_368(m3_s2 : 0.8415049039844562)
a1	487	YRVWIQCKYCKPLLS	0.998496	Q96IZ6	368	0	Q6P1Q9_368(m3_s2 : 0.8415049039844562)
a7	74	FVIKPIDKKAPDFVF	0.998479	P15311	262	0	P15311_262(m1_s2 : 0.9984788223503612)
a6	1058	GYNQPDSKRRQTNNQ	0.998474	O60506	576	0	O60506_576(m3_s1 : 0.8719864228015826)
a5	82	GEKPYECKECGKAFN	0.998463	Q147U1	397	0	Q147U1_397(m2_s2 : 0.7902212895688063)
a1	44	KAVTKAQKKDGKKRK	0.99846	Q8N257	24	0	Q8N257_24(m3_s2 : 0.8724337569596333)
a7	75	GRSVHYWKKVLPLLK	0.998449	P0DJD0	599	0	P0DJD0_599(m1_s2 : 0.9984494289264656)
a5	85	LLDSVQLKDLWKKIC	0.99844	Q9Y2I7	356	0	Q9Y2I7_356(m2_s2 : 0.7896561956397714)
a4	990	GDCKEPDKCCWRHKQ	0.998429	Q8NCQ7	66	0	Q8NCQ7_66(m2_s2 : 0.8184737991567367)
a6	1041	KKKMQMLKLDKENAL	0.998392	P06753	13	0	P06753_13(m3_s1 : 0.8733689368410373)
a1	438	EKDWNNHKKGKDCSK	0.998391	P05305	143	0	P05305_143(m3_s2 : 0.8429782527927336)
a1	273	LPTGKSKKKKKKKKK	0.998391	Q86UE4	444	1	Q86UE4_444(m3_s2 : 0.8486443605920695)
a1	56	GKARAKAKTRSSRAG	0.998375	P0C0S8	16	0	P0C0S8_16(m3_s2 : 0.8697108669610962)
a5	270	PQTKNIKKKTKKRQC	0.998366	Q9Y5K6	106	0	Q9Y5K6_106(m1_s4 : 0.9983657288183658)
a1	423	ECDTLSRKKSARFKS	0.998348	Q5T5U3	1706	0	Q5T5U3_1706(m3_s2 : 0.8436425985285719)
a6	771	VEKRNRLKLLLPWLE	0.998345	Q00610	856	0	Q00610_856(m2_s1 : 0.7827225853733989)
a6	981	SLLENLEKIEKEQSK	0.99834	O60812	203	0	P07910_216(m3_s1 : 0.8776279257433113)
a1	500	CEQTEEKKKLKRHLA	0.998329	Q96P65	408	0	Q96P65_408(m3_s2 : 0.8410551973886856)
a5	276	KEKKIQRKKRKKNKC	0.998313	Q86X95	292	1	Q86X95_292(m1_s4 : 0.9983133280930548)
a1	352	SEPSCWGKKKKKKKR	0.998285	Q99569	788	1	Q99569_788(m3_s2 : 0.8459108662837529)
a1	33	TYDPEGFKKRAACLC	0.99828	Q96G61	17	0	Q8NFP7_17(m3_s2 : 0.8777683579633283)
a1	33	TYDPEGFKKRAACLC	0.99828	Q8NFP7	17	0	Q8NFP7_17(m3_s2 : 0.8777683579633283)
a6	777	QRVHTGEKPYKCLEC	0.998245	P17028	305	0	P17028_305(m2_s1 : 0.7822162263682668)
a5	154	ERTHTGEKPYKCKQC	0.99824	Q9Y2A4	279	0	Q9Y2A4_279(m2_s2 : 0.785075646453431)
a6	1177	IHTDAFSKRSDLIQH	0.998235	O43361	539	0	O43361_539(m3_s1 : 0.8655995206108843)
a5	118	QFASFIDKVRFLEQQ	0.998234	P04264	197	0	P04264_197(m2_s2 : 0.7869668249501385)
a5	283	NIVGYNNKKCWPRDA	0.99823	Q6P2Q9	1131	0	Q6P2Q9_1131(m1_s4 : 0.9982299242782308)
a1	468	YSYGRGPKVKGKLKC	0.998194	Q12986	183	0	Q12986_183(m3_s2 : 0.842201188965099)
a5	287	LNFFNQKKKKKKTKK	0.998186	P20042	80	1	P20042_80(m1_s4 : 0.9981858377367252)
a6	1074	YDATYETKESKKEDL	0.998185	Q9Y281	92	0	Q9Y281_92(m3_s1 : 0.8712781428362396)
a1	148	GLAEEIQKYCCSRKA	0.998156	P53004	290	0	P53004_290(m3_s2 : 0.8574925354018369)
a4	740	CTRCTEVKKLFKSLC	0.998153	Q16881	83	0	Q16881_83(m2_s4 : 0.8408049001291116)
a6	1184	IHGSDSVKSAEKEIS	0.998146	P22392	124	0	P22392_124(m3_s1 : 0.8654599574107416)
a1	119	PKKSQVLKSCRKKKG	0.998132	Q69YH5	560	0	Q69YH5_560(m3_s2 : 0.8606571792360935)
a5	293	FLLSASKKKRISKQC	0.998121	Q562F6	142	0	Q562F6_142(m1_s4 : 0.9981212281941212)
a6	1037	LYDSMKGKGTRDKVL	0.99811	P07355	281	0	P07355_281(m3_s1 : 0.8735192674249143)
a5	296	GIERQYRKKCAKCGL	0.998103	Q9H5V9	91	0	Q9H5V9_91(m1_s4 : 0.9981026027973948)
a7	76	YWVERAAKLFPGSPA	0.998086	P0DJD0	114	0	P0DJD0_114(m1_s2 : 0.9980860047463062)
a6	1114	KFLTLGSKFRYSGRT	0.998084	Q9Y2J2	405	0	Q9Y2J2_405(m3_s1 : 0.8684711506023568)
a7	77	ESAPLKSKMIYASSK	0.998065	Q9Y281	114	0	Q9Y281_114(m1_s2 : 0.998064543965009)
a1	163	PLATGGIKKSGKKAA	0.998058	Q9Y2S6	59	0	Q9Y2S6_59(m3_s2 : 0.8560796511330647)
a7	78	RSEVDMLKIRSEFKR	0.997966	P07355	302	0	P07355_302(m1_s2 : 0.997965743596912)
a1	160	VFKEENQKGDKKLRC	0.997965	Q9NYF8	681	0	Q9NYF8_681(m3_s2 : 0.856512852780963)
a5	306	TNEGMNVKKCCKGFC	0.997965	Q12879	453	0	Q12879_453(m1_s4 : 0.997964821587682)
a1	342	RLSKDAVKKKACTLA	0.997951	Q8N7X4	196	0	Q8N7X4_196(m3_s2 : 0.8462515105469295)
a7	79	EQFINAAKIIRHPKY	0.997944	P35030	149	0	P35030_149(m1_s2 : 0.9979435224841672)
a7	80	KMDLAPSKDMGPPKE	0.997917	P27816	394	0	P27816_394(m1_s2 : 0.9979167890497732)
a5	308	EYDEFGRKKKKYRGK	0.9979	O95218	130	0	O95218_130(m1_s4 : 0.997900183607917)
a5	311	RELERYVKSCLQKKQ	0.997871	Q15059	634	0	Q15059_634(m1_s4 : 0.997871164175111)
a1	238	EVYEYWIKKRKNCRG	0.997871	Q9H2F5	180	0	Q9H2F5_180(m3_s2 : 0.8505444340400754)
a6	924	GNTSRRGKSGFNSKS	0.99785	O60812	157	0	P07910_170(m3_s1 : 0.8844412567532476)
a6	1014	HQPDDKKKNRGFCFL	0.997818	O60506	284	0	O60506_284(m3_s1 : 0.8748677041207423)
a1	541	DICFRTLKLTTPTYG	0.997817	P07437	216	0	P07437_216(m2_s3 : 0.8001202197240842)
a1	151	FLAKCRKKKKLFAPW	0.997806	Q15051	437	0	Q15051_437(m3_s2 : 0.8573408446019322)
a7	81	KLMVALAKGRRAEDG	0.997806	P07355	176	0	P07355_176(m1_s2 : 0.997806232248182)
a1	292	FLCGKEIKKKKCIFR	0.997783	Q5T6S3	331	1	Q5T6S3_331(m3_s2 : 0.8482026865876102)
a7	82	KKKQEEKKTKFENLC	0.997761	P07900	565	0	P07900_565(m1_s2 : 0.9977611749071282)
a6	969	MQCSALRKNGFVVLK	0.997737	Q6IS14	27	0	Q9GZV4_27(m3_s1 : 0.8783544859603637)
a4	641	TVIFAVVKKSKLHWC	0.997693	Q99705	136	0	Q99705_136(m2_s4 : 0.8481406776997109)
a6	1044	ETVLSALKEKKKKRT	0.997673	A8CG34	294	0	A8CG34_294(m3_s1 : 0.8731331099362839)
a3	293	YRGDVVPKDVNAAIA	0.997664	P68363	326	0	P68366_326(m1_s3 : 0.8513896182482414)
a2	875	IMSSPLSKELRQKYN	0.99765	Q9UNX3	36	0	Q9UNX3_36(m2_s3 : 0.6557295496360163)
a5	109	FEAVQSGKKKKKQKM	0.997648	Q6Y7W6	1262	0	Q6Y7W6_1262(m2_s2 : 0.78769220653398)
a1	493	HKRKEPNKSIKHCTV	0.997633	Q9NXF1	416	0	Q9NXF1_416(m3_s2 : 0.841209793735974)
a1	279	FKVEDAIKVLQCHKP	0.997621	Q96G61	127	0	Q8NFP7_127(m3_s2 : 0.8484598716833741)
a6	691	TAIQELFKRISEQFT	0.997606	P04350	379	0	P07437_379(m2_s1 : 0.7901052244459488)
a5	330	EYDTKEVKYCTFSKD	0.997587	Q8NHS4	153	0	Q8NHS4_153(m1_s4 : 0.997586828410444)
a1	262	NIGKVNKKSNKKRIC	0.997561	Q03188	793	1	Q03188_793(m3_s2 : 0.8492850275531523)
a1	441	AGAGKVTKSAQKAQK	0.99755	P68104	453	0	P68104_453(m3_s2 : 0.8429484454705714)
a7	83	MPWFKGWKVTRKDGN	0.997508	P68104	215	0	P68104_215(m1_s2 : 0.9975084903069368)
a3	416	QYGCDVVKGQIRCQC	0.997461	Q6UXI9	146	0	Q6UXI9_146(m2_s4 : 0.880369161002412)
a5	336	CADPENHKVRQKLKA	0.997456	Q13111	658	0	Q13111_658(m1_s4 : 0.9974555325615884)
a3	448	FVDSRQLKVCATCFD	0.997449	Q5XPI4	1069	0	Q5XPI4_1069(m2_s4 : 0.8723301325738954)
a1	286	QFLEKINKNCWRIKK	0.997427	Q9Y3I0	17	0	Q9Y3I0_17(m3_s2 : 0.8483060682297201)
a7	84	RVYKEMYKTDLEKDI	0.997424	P07355	152	0	P07355_152(m1_s2 : 0.9974238811707212)
a6	1118	LLQRSDKKYDEAIKC	0.997422	Q9BXJ9	95	0	Q9BXJ9_95(m3_s1 : 0.8684275310221999)
a5	41	KYREAYLKECWPLVQ	0.997397	Q13601	73	0	Q13601_73(m2_s2 : 0.7933117835826953)
a7	85	LEDIESVKKKNDNLL	0.997393	Q6S8J3	684	0	Q6S8J3_684(m1_s2 : 0.9973930023678635)
a4	715	QPQEPENKKCSCVMC	0.997389	P23497	486	0	P23497_486(m2_s4 : 0.8421971290521397)
a5	339	NIHKCTIKHCPFCPR	0.997387	Q9UHF7	562	0	Q9UHF7_562(m1_s4 : 0.997386850142226)
a1	382	RKNFLQVKKAATCLQ	0.997367	Q8IZT6	1802	0	Q8IZT6_1802(m3_s2 : 0.8447131727863977)
a1	325	KEDTSPKKKKKKLRQ	0.997344	Q99549	152	1	Q99549_152(m3_s2 : 0.8469314659683163)
a5	347	AVLKARAKLLQKYLC	0.99733	Q04637	1509	0	Q04637_1509(m1_s4 : 0.9973295766981308)
a1	300	VVDSLYNKAKKLTAA	0.997328	O00231	417	0	O00231_417(m3_s2 : 0.8478315860129468)
a1	86	FLAQMEAKYCKSSKG	0.997316	Q8WXX5	241	0	Q8WXX5_241(m3_s2 : 0.864269322031203)
a1	131	ASKWDYEKNEWKKAA	0.997314	P13073	164	0	P13073_164(m3_s2 : 0.8595038520030764)
a7	86	LKMQLAKKEEELQAA	0.997291	P35749	1088	0	P35749_1088(m1_s2 : 0.9972914825457896)
a5	357	EFDKLHQKYCLKSPG	0.997229	Q8NCD3	590	0	Q8NCD3_590(m1_s4 : 0.997228510226072)
a1	73	FVTSDRSKNRKRHFN	0.99722	Q9UNX3	13	0	Q9UNX3_13(m3_s2 : 0.8655571785792999)
a6	811	RKNEPIIKVSDHSNR	0.997204	O94979	206	0	O94979_206(m2_s1 : 0.7802629281997923)
a5	360	PLDEDPSKLCRHSLK	0.997198	Q9HCE3	748	0	Q9HCE3_748(m1_s4 : 0.9971977448395456)
a1	596	QSKTTPFKDCKVLKQ	0.997184	O14646	452	0	O14646_452(m2_s3 : 0.7535226298118758)
a1	560	KCDPRHGKYMACCML	0.997162	Q9NY65	311	0	Q9NY65_311(m2_s3 : 0.7777961461541184)
a5	366	FSNEEEVKQALKCNR	0.99713	Q9Y4C8	347	0	Q9Y4C8_347(m1_s4 : 0.9971295880686224)
a1	367	HQGTRPHKCQVCHKA	0.997121	Q8N895	310	0	Q8N895_310(m3_s2 : 0.845273102408575)
a1	367	HQGTRPHKCQVCHKA	0.997121	Q8N1W2	352	0	Q8N895_310(m3_s2 : 0.845273102408575)
a6	923	KKRKRSRKESYSVYV	0.99712	Q5QNW6	35	0	Q99879_35(m3_s1 : 0.8845497757885425)
a5	371	DEVFELVKVFADCKY	0.997112	Q9UFH2	469	0	Q9UFH2_469(m1_s4 : 0.9971118637693548)
a6	1130	MNRYSAQKQYWKAKQ	0.997105	Q14571	70	0	Q14571_70(m3_s1 : 0.8676938044846659)
a3	204	VSNDLSQKLYATMEK	0.997078	Q09472	1583	0	Q09472_1583(m1_s3 : 0.9970780613739268)
aM	3	DSESPSQKKKKKKKK	0.997058	Q13428	1475	1	Q13428_1475(m3_s2 : 0.8804989812656627)
a7	87	DLYDAGVKRKGTDVP	0.997046	P07355	204	0	P07355_204(m1_s2 : 0.9970461333627264)
a5	379	ESDEEAVKKTNKCVL	0.997029	O43395	625	0	O43395_625(m1_s4 : 0.9970287728418536)
a1	72	YKDKRRKKKKKRKKL	0.996975	Q66PJ3	298	1	Q66PJ3_298(m3_s2 : 0.8655585531469465)
a6	705	GENPYECKECGKAFA	0.996962	Q9Y2A4	619	0	Q9Y2A4_619(m2_s1 : 0.7881080113306905)
a3	205	RVHRLLRKGNYAERV	0.996958	P0C0S8	37	0	P0C0S8_37(m1_s3 : 0.996957616516501)
a1	80	FDPTMSKKKKKKKKP	0.996957	P20042	15	1	P20042_15(m3_s2 : 0.8649244182527794)
a4	625	FSYGYSLKGIKTCNC	0.996943	Q00839	384	0	Q00839_384(m2_s4 : 0.8498070130741284)
a1	563	FGNILSCKVVCDENG	0.996929	P11940	129	0	P11940_129(m2_s3 : 0.7765870295983505)
a1	38	APKKGSKKAVTKAQK	0.996927	P57053	17	0	P57053_17(m3_s2 : 0.8749263090734108)
a5	393	KRNICSVKYSVKKIN	0.996925	Q9GZR1	858	0	Q9GZR1_858(m1_s4 : 0.9969248216378294)
a1	316	ALPTGKSKKKKKKKK	0.996916	Q86UE4	443	1	Q86UE4_443(m3_s2 : 0.8472224496418029)
a7	88	VHAEYLEKLKLGCSP	0.996915	Q9NZJ9	142	0	Q9NZJ9_142(m1_s2 : 0.9969148552406384)
a7	89	GFSGAGEKLFSSQYG	0.996894	P49792	1977	0	P49792_1977(m1_s2 : 0.9968936163460116)
a7	90	TVHEILCKLSLEGDH	0.996891	P07355	10	0	P07355_10(m1_s2 : 0.9968909868197916)
a7	91	RFTMELAKKGFIGPG	0.996874	P00367	211	0	P00367_211(m1_s2 : 0.9968737009565276)
a1	210	FHVIRINKMLSCAGA	0.996836	Q96L21	101	0	Q96L21_101(m3_s2 : 0.8524129045325538)
a1	254	CGKEIKKKKCIFRLR	0.996806	Q5T6S3	333	0	Q5T6S3_333(m3_s2 : 0.8496548978422005)
a5	407	NIDTMAIKKQKRCRK	0.996803	Q8ND23	908	0	Q8ND23_908(m1_s4 : 0.996803226674148)
a5	408	YVKSCLQKKQRKPFS	0.996758	Q15059	639	0	Q15059_639(m1_s4 : 0.9967578040316968)
a4	978	EILKVEQKYNKLRQP	0.996742	Q01105	72	0	Q01105_72(m2_s2 : 0.8202283167140514)
a4	1018	CHKKCCLKTTAKCSK	0.996719	B2RTY4	2043	0	B2RTY4_2043(m2_s2 : 0.8135824808138565)
a7	92	ELTQIKQKVDSLLEN	0.996714	O60812	193	0	O60812_193(m1_s2 : 0.996713640917017)
a5	414	DLPEGAVKGLCKLFC	0.996692	Q92616	48	0	Q92616_48(m1_s4 : 0.9966917971070262)
a1	213	QLLGPTHKKKSKKKK	0.99665	Q15361	272	1	Q15361_272(m3_s2 : 0.8521619967586633)
a1	67	SRYTYLEKAIKIHNA	0.996632	Q93009	1096	0	Q93009_1096(m3_s2 : 0.8665188219266152)
a3	393	SYFRLGVKGVLFQPC	0.996626	Q07954	2653	0	Q07954_2653(m2_s4 : 0.8852427584178292)
a7	93	FAMKKINKQNLILRN	0.996579	Q6P0Q8	545	0	Q6P0Q8_545(m1_s2 : 0.9965791003038758)
a1	581	RQIISHWKNCTRHDC	0.996561	Q09472	404	0	Q09472_404(m2_s3 : 0.7607470443448814)
a1	66	EVVKLLNKVWKTDAA	0.996529	P53007	306	0	P53007_306(m3_s2 : 0.8668794443226918)
a1	125	ELAKRKVKKKKRKKK	0.996524	Q6ZQX7	86	1	Q6ZQX7_86(m3_s2 : 0.8599926803692236)
a5	431	ALSKFTLKKLLLLVC	0.996482	Q8IZT6	888	0	Q8IZT6_888(m1_s4 : 0.996481828752512)
a5	433	AYILNLVKQIKKTGC	0.996471	P50991	288	0	P50991_288(m1_s4 : 0.996471427025478)
a7	94	FVGRLIGKEGRNLKK	0.996435	Q9NZI8	294	0	Q9NZI8_294(m1_s2 : 0.996435242200878)
a1	233	FYQRVAKKDCIKKWI	0.996417	Q86Y07	83	0	Q86Y07_83(m3_s2 : 0.8509398089690646)
a1	116	KKKKKEKKKHKKHKK	0.996415	Q7Z6E9	1736	1	Q7Z6E9_1736(m3_s2 : 0.8608615901460744)
a1	188	LKKKISDKCRKKNIC	0.996378	O14802	149	1	O14802_149(m3_s2 : 0.8538857460555012)
a5	446	LNLEEENKKCQDRSH	0.996339	Q5VT97	306	0	Q5VT97_306(m1_s4 : 0.9963387531869728)
a3	206	KKRKRSRKESYSIYV	0.996316	P33778	35	0	P33778_35(m1_s3 : 0.9963159570724875)
a5	449	GKSSSYLKKCRRRSA	0.996316	Q69YH5	85	0	Q69YH5_85(m1_s4 : 0.9963158538321756)
a1	408	DTKGDYQKALLYLCG	0.996314	P07355	329	0	P07355_329(m3_s2 : 0.8440122283070621)
a1	48	KHLTLNNKVQKKRWQ	0.996306	P23497	564	0	P23497_564(m3_s2 : 0.8707067872378778)
a2	609	KRVVQHTKGCKRKTN	0.996274	Q09472	1769	0	Q09472_1769(m2_s3 : 0.7456619737437287)
a5	462	KQHSLTHKGVKEHKC	0.996189	Q8N895	444	0	Q8N895_444(m1_s4 : 0.9961889249593932)
a1	379	FHKSRRKKKRKKLCQ	0.996172	Q7Z570	597	1	Q7Z570_597(m3_s2 : 0.8448385305210789)
a5	467	RKGKQICKYFLERKC	0.996162	Q8N5P1	198	0	Q8N5P1_198(m1_s4 : 0.9961615566798548)
a5	471	PTHKKKSKKKKKKKS	0.996152	Q15361	276	0	Q15361_276(m1_s4 : 0.9961523819652676)
a5	473	EFCEIEVKKPKRKRS	0.996139	Q7Z333	1158	0	Q7Z333_1158(m1_s4 : 0.9961386882392528)
a7	95	TRIPKVQKLLQDFFN	0.996128	P0DMV8	348	0	P0DMV8_348(m1_s2 : 0.996128146304739)
a1	64	AQKKDGKKRKRSRKE	0.996086	P33778	29	0	P33778_29(m3_s2 : 0.867058405670537)
a6	1149	GEKPYQCKECGKAFI	0.996075	Q8N8L2	414	0	Q8N8L2_414(m3_s1 : 0.866851210256728)
a4	1144	LGGSNLVKPCACHGG	0.996052	Q13023	1347	0	Q13023_1347(m2_s2 : 0.7988695956011334)
a5	482	KYLEIPLKDLKYYRC	0.996045	Q9H981	225	0	Q9H981_225(m1_s4 : 0.9960450305478048)
a7	96	FPHLFTGKRTPWRGI	0.996038	Q9UN37	156	0	Q9UN37_156(m1_s2 : 0.9960379967368048)
a4	959	HLLLNPAKYHKKKHK	0.996	Q9NR48	1438	0	Q9NR48_1438(m2_s2 : 0.824057277869747)
a1	191	LPCNCGAKKCRKFLN	0.996	Q03164	3962	0	Q03164_3962(m3_s2 : 0.8533883275598808)
a5	491	RSVLNNLKGDKFIKC	0.995992	P29083	67	0	P29083_67(m1_s4 : 0.9959923429838764)
a5	493	EILICRNKFLLKNKQ	0.99598	P21359	609	0	P21359_609(m1_s4 : 0.9959799240070268)
a5	502	HVTVVPSKLRLVCLA	0.995922	Q9H8H2	491	0	Q9H8H2_491(m1_s4 : 0.9959217574771572)
a4	1165	HKRSPPAKESALSKC	0.995888	Q9UM82	376	0	Q9UM82_376(m2_s2 : 0.7967405363728892)
a5	103	CILSHPIKNTNDANS	0.995865	P50395	309	0	P50395_309(m2_s2 : 0.7882867307690344)
a7	97	PSKLDSGKELHINLI	0.99586	P07900	74	0	P07900_74(m1_s2 : 0.99586036556542)
a1	312	LVYKENCKLKKKLPS	0.995853	Q8IVF5	1368	1	Q8IVF5_1368(m3_s2 : 0.847263141291924)
a7	98	PFFPGLVKYMNSGPV	0.995853	P22392	66	0	P22392_66(m1_s2 : 0.9958529115426088)
a7	99	LASLRHAKWFQARAN	0.995829	Q12906	214	0	Q12906_214(m1_s2 : 0.9958293045048492)
a5	511	RGHFCPIKRKANSTK	0.995807	Q8IVF5	1636	0	Q8IVF5_1636(m1_s4 : 0.9958070052280156)
a1	178	NVLDMEVKKKKHDKQ	0.995797	Q9HCM1	1388	0	Q9HCM1_1388(m3_s2 : 0.8552462771561548)
aM	14	SAVQAARKLLSSDRN	0.99577	O00505	97	1	O00505_97(m2_s1 : 0.8161395097942141)
a7	100	DPWACPLKCCKASRN	0.995764	Q38SD2	428	0	Q38SD2_428(m1_s2 : 0.9957636467853108)
a7	101	DAKLKGPKFKMPEMS	0.995758	Q09666	4708	0	Q09666_4708(m1_s2 : 0.9957576984171196)
a1	288	GAYGREKKRCKLLGK	0.995729	P46100	1092	0	P46100_1092(m3_s2 : 0.8482780959180208)
a6	1156	PKKAQVSKSLKERLG	0.995714	O75152	329	0	O75152_329(m3_s1 : 0.8664183133505331)
a7	102	RTIEKFEKEAAEMGK	0.995675	P68104	44	0	P68104_44(m1_s2 : 0.9956749760343224)
a1	220	DVDTPPRKKKRKHRL	0.995663	Q15910	491	0	Q15910_491(m3_s2 : 0.8516892518807729)
a1	483	LPRLCIRKFFPKKKC	0.995635	P32455	228	1	P32455_228(m3_s2 : 0.8416864560092747)
a6	1191	FLDRESIKLVSIDSK	0.995614	P21333	120	0	P21333_120(m3_s1 : 0.8651662994599356)
a1	422	RKQAQIRKVYPGLSC	0.995608	Q92831	683	0	Q92831_683(m3_s2 : 0.8437368352932033)
a5	58	LHNKLFNKVFRCPMS	0.995577	Q96J66	902	0	Q96J66_902(m2_s2 : 0.7918986509276624)
a7	103	FGNAKTVKNDNSSRF	0.995572	P35580	235	0	P35580_235(m1_s2 : 0.9955724597174972)
a7	104	CSDGRSRKSKKKRQQ	0.995559	Q5T3I0	377	0	Q5T3I0_377(m1_s2 : 0.9955590167736876)
a1	535	TVPKGGWKCKWCVWC	0.995532	Q8NEZ4	1050	0	Q8NEZ4_1050(m2_s3 : 0.8080847864871279)
a1	261	PYILTLRKKWKDCKL	0.995525	Q13621	934	0	Q13621_934(m3_s2 : 0.8493045277675979)
a7	105	CKYFLERKCIKGDQC	0.995523	Q8N5P1	204	0	Q8N5P1_204(m1_s2 : 0.9955233718436048)
a1	311	PSCWGKKKKKKKRTP	0.995498	Q99569	790	1	Q99569_790(m3_s2 : 0.8472823084306891)
a1	353	ACKRLEKKRIKKRKG	0.995489	P34947	220	0	P34947_220(m3_s2 : 0.8458720798721898)
a6	647	KYSLSPSKSYKYSPK	0.995377	P0DJD0	782	0	P0DJD0_782(m2_s1 : 0.7958389830710808)
a7	106	EPANQMVKCDPRHGK	0.995362	Q71U36	304	0	Q71U36_304(m1_s2 : 0.9953621515078952)
a7	107	LYRSKGNKKPWKHFW	0.995361	Q6ZV73	1347	0	Q6ZV73_1347(m1_s2 : 0.9953613697235868)
a1	224	KHSKEKKKSSKKTKC	0.995361	Q8IYX8	245	1	Q8IYX8_245(m3_s2 : 0.8515369628043221)
a7	108	FNLLDPLKYHMKHCC	0.995328	Q8ND82	253	0	Q8ND82_253(m1_s2 : 0.9953275545980536)
a7	109	LKSTSNLKVLKLHSC	0.995292	Q6UY01	257	0	Q6UY01_257(m1_s2 : 0.9952918682065666)
a1	267	KSRFLCGKEIKKKKC	0.995277	Q5T6S3	328	0	Q5T6S3_328(m3_s2 : 0.8490407273751089)
a1	202	QEYEEGGKQCVERKC	0.995266	O96019	421	0	O96019_421(m3_s2 : 0.852826465979844)
a2	645	QMLNVQNKNSSYFVE	0.995199	P07437	336	0	P07437_336(m2_s3 : 0.7299155602886864)
a4	1029	FSKFRANKGLKTNCC	0.995185	Q14202	444	0	Q14202_444(m2_s2 : 0.8119354809905908)
a7	110	KKVLPLLKIIKKNSI	0.995152	P0DJD0	606	0	P0DJD0_606(m1_s2 : 0.9951521348623436)
a4	962	HQFTCKNKFCKPLFW	0.995121	Q9Y5Y6	499	0	Q9Y5Y6_499(m2_s2 : 0.8237073767047902)
a6	1180	SSDDYTKKKKKGKKG	0.995117	P46100	1930	0	P46100_1930(m3_s1 : 0.8655655841641283)
a7	111	RSVHYWKKVLPLLKI	0.995113	P0DJD0	600	0	P0DJD0_600(m1_s2 : 0.995113499199091)
a1	305	RLYGKLAKVAKSNKC	0.995102	Q9NWS1	553	0	Q9NWS1_553(m3_s2 : 0.8475788537417208)
a1	84	PSRSKPKKKSKKHKD	0.99508	P55199	450	0	P55199_450(m3_s2 : 0.8645975034464248)
a1	396	SFLKEKNKKLKKKNK	0.995049	Q96QE3	476	1	Q96QE3_476(m3_s2 : 0.8444607575394879)
a7	112	LAAQLEKKRDDFCKQ	0.995029	P32455	391	0	P32455_391(m1_s2 : 0.9950288128666214)
a1	70	IHTPVSDKKKKKCSI	0.994989	Q15361	17	0	Q15361_17(m3_s2 : 0.8656649701781131)
a1	545	LKWELELKRWCPGLK	0.994966	Q96L91	1160	0	Q96L91_1160(m2_s3 : 0.794633947040292)
a4	1042	LEDRPENKSCNDKLQ	0.99496	Q9P212	1609	0	Q9P212_1609(m2_s2 : 0.8096404815762566)
a7	113	NYDDDEKKVTGGRNG	0.994948	P11388	157	0	P11388_157(m1_s2 : 0.9949476214803494)
a1	129	ETSWESPKQIKKKKK	0.994941	Q86UE4	570	0	Q86UE4_570(m3_s2 : 0.8596287681061798)
a7	114	VGRDYVQKAQTKEQA	0.994927	P35579	403	0	P35579_403(m1_s2 : 0.9949274952463376)
a1	82	KKEKCEYKKKAKNPK	0.994913	P38432	194	1	P38432_194(m3_s2 : 0.864612510503211)
a7	115	EETEPDCKYSKKHWK	0.994902	P38432	127	0	P38432_127(m1_s2 : 0.9949023427962778)
a6	679	FSETGAGKHVPRAVF	0.994865	Q71U36	60	0	Q71U36_60(m2_s1 : 0.7915420387769381)
a1	214	DYYKSYIKTCLDNLA	0.994827	P46940	1532	0	P46940_1532(m3_s2 : 0.8521198923719626)
a1	42	GRGKQGGKARAKAKT	0.994815	P0C0S8	10	0	P0C0S8_10(m3_s2 : 0.8726240065919318)
a7	116	CNKETLVKRLKKLHL	0.994805	Q6ZU65	522	0	Q6ZU65_522(m1_s2 : 0.9948054860181166)
a7	117	AIAEIWPKYCCFLAC	0.994775	Q9H5I5	1168	0	Q9H5I5_1168(m1_s2 : 0.9947746582219856)
a4	1047	SSILQELKRVEKQLQ	0.994734	Q5SW79	1481	0	Q5SW79_1481(m2_s2 : 0.8089020061276517)
a1	410	FLKEKNKKLKKKNKK	0.994658	Q96QE3	477	1	Q96QE3_477(m3_s2 : 0.8439758234907078)
a4	1038	DSAEDVRKVCQDCPL	0.994635	P02765	144	0	P02765_144(m2_s2 : 0.8100614952410146)
a2	694	FVENYGQKIIKKNLC	0.994614	Q15022	646	0	Q15022_646(m2_s3 : 0.7160447963143389)
a7	118	KKLRNGVKYCKVLRL	0.994608	Q9Y2K6	571	0	Q9Y2K6_571(m1_s2 : 0.9946082474242506)
a7	119	FKHNKQLKKTKKRLK	0.99455	Q14692	196	0	Q14692_196(m1_s2 : 0.9945499598109744)
a1	296	DKAKNSLKRKARNRC	0.994535	Q8IZQ8	65	1	Q8IZQ8_65(m3_s2 : 0.84794599437159)
a7	120	HHLEAEVKFCKEELS	0.994492	Q86SQ7	137	0	Q86SQ7_137(m1_s2 : 0.9944924444589588)
a1	207	RSPTPKQKKKKKKKD	0.994485	Q9UQ35	188	1	Q9UQ35_188(m3_s2 : 0.8527394977941078)
a2	662	LLKFNQLKFRKKKLK	0.99447	Q9UPS6	1823	0	Q9UPS6_1823(m2_s3 : 0.7240376488925858)
a1	128	SGKSHRHKKKKKHKK	0.994467	Q9UKJ3	676	1	Q9UKJ3_676(m3_s2 : 0.8598868731381392)
a1	449	KVLKFACKVQKKDPK	0.994465	Q9UNF1	462	0	Q9UNF1_462(m3_s2 : 0.842807369245356)
a7	121	ELSTPEGKWQWKVHC	0.994436	Q9UK61	1362	0	Q9UK61_1362(m1_s2 : 0.9944359860708876)
a1	186	GVTSLTQKKVLRAPC	0.994391	Q5BJF6	26	0	Q5BJF6_26(m3_s2 : 0.8542809681240883)
a7	122	HASGKLRKKKKKQKN	0.994386	Q9BQ70	127	1	Q9BQ70_127(m1_s2 : 0.9943856754028104)
a7	123	EVFDVLEKLGEGSYG	0.994379	Q13043	35	0	Q13043_35(m1_s2 : 0.994378818511386)
a7	124	LFSVIKNKLSRKLLC	0.994376	O75691	1404	0	O75691_1404(m1_s2 : 0.9943756443851962)
a1	362	RRDFAVVKALAKLKA	0.994373	Q49MI3	378	0	Q49MI3_378(m3_s2 : 0.8455646329363263)
a1	96	VRVKPKKKKKKKKKT	0.994358	Q9BVI0	544	1	Q9BVI0_544(m3_s2 : 0.8628890208961786)
a1	150	CKYKECNKRFLCSKA	0.994357	Q13129	1371	0	Q13129_1371(m3_s2 : 0.8574073725995855)
a7	125	LLKDYEQKIERLLKC	0.994355	Q8WXH0	1025	0	Q8WXH0_1025(m1_s2 : 0.9943552933791404)
a5	128	YGLQNFNKQKKLKRC	0.994317	O75762	52	0	O75762_52(m2_s2 : 0.7863795984763575)
a7	126	PSYISRFKKHKLIPC	0.99431	A4D1E1	635	0	A4D1E1_635(m1_s2 : 0.994310013797295)
a1	561	RSLVCGSKVKLCYIG	0.994297	Q96L73	618	0	Q96L73_618(m2_s3 : 0.7777154104632988)
a1	268	DLALRGKKKRKKFMK	0.994286	Q96GQ7	679	1	Q96GQ7_679(m3_s2 : 0.8489548694390319)
a7	127	KIVLYAKKVGYTPDW	0.994244	Q00610	507	0	Q00610_507(m1_s2 : 0.9942441274521688)
a1	193	QKKKISQKKLKKQKL	0.994132	P18621	173	1	P18621_173(m3_s2 : 0.853201049182006)
a7	128	NKLKLSQKKCSFLCD	0.994077	Q9P2D0	762	0	Q9P2D0_762(m1_s2 : 0.9940772894113368)
a6	1025	EYAQEAVKKGSTAVG	0.994062	Q8TAA3	29	0	Q8TAA3_29(m3_s1 : 0.8743081707062337)
a7	129	IDKRTIEKFEKEAAE	0.994059	P68104	41	0	P68104_41(m1_s2 : 0.9940590656832488)
a4	953	LHMDCEIKGRPCCIG	0.994043	Q6PJF5	596	0	Q6PJF5_596(m2_s2 : 0.825987041424247)
a7	130	PSLLPFLKAVCKSKK	0.99404	O75533	649	0	O75533_649(m1_s2 : 0.9940399325129408)
a7	131	GYAEVLLKERKHAQC	0.99403	Q9NR09	4176	0	Q9NR09_4176(m1_s2 : 0.9940296592616809)
a1	78	HKKKKKHKKSSKHKR	0.994021	Q9UKJ3	682	1	Q9UKJ3_682(m3_s2 : 0.8652719348963014)
a6	1078	GNVGGKRKADGYNQP	0.993974	O60506	566	0	O60506_566(m3_s1 : 0.8709368858378155)
a7	132	PVGSLSVKNKAHCLQ	0.993968	Q03001	2471	0	Q03001_2471(m1_s2 : 0.993967741252888)
a7	133	HLIKNPVKTCDKVYS	0.993952	O43314	661	0	O43314_661(m1_s2 : 0.9939518752029868)
a4	1053	CTDDFIAKVVQRCMS	0.993948	Q15648	496	0	Q15648_496(m2_s2 : 0.8085898251606816)
a1	518	LVDKLQLKVKAYKRQ	0.993916	P12883	1874	0	P12883_1874(m3_s2 : 0.8404993068557953)
a7	134	HFNPEVVKYRQLCFK	0.993882	Q6P4R8	122	0	Q6P4R8_122(m1_s2 : 0.9938819350255456)
a1	161	PKKTAKSKKKKPLKK	0.993774	Q9UGP8	527	1	Q9UGP8_527(m3_s2 : 0.8561995701861169)
a1	45	DKDHYRPKQKKKKKK	0.993713	A8MW92	567	1	A8MW92_567(m3_s2 : 0.8715164454507672)
a7	135	VDKRTLEKYEREAKE	0.993706	Q8IYD1	237	0	Q8IYD1_237(m1_s2 : 0.9937059139525584)
a7	136	KSKEYFSKQKAAAAA	0.993702	Q06830	197	0	Q06830_197(m1_s2 : 0.9937016828343692)
a2	632	KRGRPGRKKKKVLGC	0.993683	Q12873	355	0	Q12873_355(m2_s3 : 0.7352854764431209)
a7	137	DLNFFNQKKKKKKTK	0.99365	P20042	79	0	P20042_79(m1_s2 : 0.993650496140634)
a1	318	RELKPNKKYSWMRKK	0.993609	O15417	1455	0	O15417_1455(m3_s2 : 0.8471498459187299)
a7	138	LTKSCEIKFLTFKDC	0.993598	Q9NYK5	126	0	Q9NYK5_126(m1_s2 : 0.9935984211623414)
a7	139	HKWKTDIKKYHRIQC	0.993591	Q96ME7	401	0	Q96ME7_401(m1_s2 : 0.9935908653923384)
a4	1091	CLYSFPSKKSKARYL	0.993579	Q9Y6J0	956	0	Q9Y6J0_956(m2_s2 : 0.8033459337636542)
a1	36	HRQKQKHKDKWKHPE	0.993556	Q9P0U4	355	0	Q9P0U4_355(m3_s2 : 0.8756900179708178)
a1	145	KQKKRSHKKQKKSKK	0.99354	Q6ZUT1	167	0	Q6ZUT1_167(m3_s2 : 0.8578116733875135)
a7	140	MPKVKMPKFSMPGFK	0.99353	Q09666	2645	0	Q09666_2645(m1_s2 : 0.9935302987149488)
a6	1139	DYNMAKAKMKNKQLP	0.993527	O43768	76	0	O43768_76(m3_s1 : 0.8674361795612847)
a7	141	DVAENLNKKLQFCHQ	0.99352	Q8NHS4	229	0	Q8NHS4_229(m1_s2 : 0.9935195102615156)
a7	142	HTGEKPYKCEECGKG	0.993498	Q02386	361	0	Q02386_361(m1_s2 : 0.993498050615678)
a1	310	GSDYSPNKKKKKKLK	0.993467	Q8TDI0	97	1	Q8TDI0_97(m3_s2 : 0.8473042788237881)
a7	143	LSTSLQSKPLKKRKG	0.993455	Q9NR48	707	0	Q9NR48_707(m1_s2 : 0.9934548737936554)
a7	144	QYSKPPHKKLKDRQI	0.993404	Q53EP0	193	0	Q53EP0_193(m1_s2 : 0.993404166750972)
a7	145	HGCFLNAKRNKKPVQ	0.993377	Q5TYX0	129	0	Q5TYX0_129(m1_s2 : 0.9933768025968706)
a7	146	PPLSPASKKCLTHLE	0.993367	Q9GZR1	225	0	Q9GZR1_225(m1_s2 : 0.9933673737638126)
a6	1154	GQFIDSKKASEKLLG	0.993299	P12882	744	0	P12882_744(m3_s1 : 0.8666917721360119)
a3	207	PKAPSGGKKATQASQ	0.993283	P16104	134	0	P16104_134(m1_s3 : 0.993282809638662)
a2	887	QLNADLRKLAVNMVP	0.993234	P07437	252	0	P07437_252(m2_s3 : 0.651959186681367)
a7	147	EAYRCGLKKIKNDLN	0.993229	P15924	812	0	P15924_812(m1_s2 : 0.9932289246263084)
a1	68	SVLRCGKKKVWLDPN	0.993225	P84098	20	0	P84098_20(m3_s2 : 0.8662074697756982)
a6	801	AALEQAVKFCQVHLG	0.993224	Q9Y6J0	1906	0	Q9Y6J0_1906(m2_s1 : 0.780802775288105)
a7	148	PYAHLSKKEKKKLKK	0.993189	Q8NE71	256	0	Q8NE71_256(m1_s2 : 0.993188592158476)
a6	1049	LKAVDIVKQVWDSVC	0.993176	Q460N5	732	0	Q460N5_732(m3_s1 : 0.8728292577378727)
a7	149	FQLWLETKDQAFCKQ	0.993169	Q6P4R8	482	0	Q6P4R8_482(m1_s2 : 0.9931693756391512)
a1	143	WIWACIRKRRLVAPC	0.99313	P49916	1002	0	P49916_1002(m3_s2 : 0.8579773291627333)
a6	1121	LQQHKLLKVIRKKLV	0.993129	P14625	458	0	P14625_458(m3_s1 : 0.8682182978071211)
a7	150	DYSKYINKEILRCEQ	0.99312	Q99698	1714	0	Q99698_1714(m1_s2 : 0.993119938500558)
a7	151	GFTEVVSKKQQKRLQ	0.993062	Q9Y520	1687	0	Q9Y520_1687(m1_s2 : 0.993062421273889)
a7	152	NSEKPSGKRLCKTKH	0.993062	Q6W2J9	1360	0	Q6W2J9_1360(m1_s2 : 0.9930620394587436)
a1	120	KKHKKSSKHKRKHKA	0.99305	Q9UKJ3	686	0	Q9UKJ3_686(m3_s2 : 0.8606172488805442)
a4	1065	TYMVQYEKKIKRKLQ	0.993048	Q86VD1	879	1	Q86VD1_879(m2_s2 : 0.8063698068313959)
a1	299	TLREILKKKSKPCLI	0.993042	O95785	1274	0	O95785_1274(m3_s2 : 0.8478695491759785)
a1	299	TLREILKKKSKPCLI	0.993042	M0QXA7	591	0	O95785_1274(m3_s2 : 0.8478695491759785)
a1	253	DIHGPEGKLKGPKFK	0.993021	Q09666	4575	0	Q09666_4575(m3_s2 : 0.849659152716662)
a1	394	PYLLTTKKKWKDCKI	0.993016	P55011	1047	0	P55011_1047(m3_s2 : 0.8444963373404746)
a7	153	SKTCCENKEEKCCRK	0.992929	Q8N884	400	0	Q8N884_400(m1_s2 : 0.9929285672199094)
a7	154	SSVKKIEKMKEKRQA	0.992905	O43295	220	0	O43295_220(m1_s2 : 0.9929046917215456)
a7	155	LRHSSEVKRLCCCES	0.992878	O15105	175	0	O15105_175(m1_s2 : 0.9928777951618076)
a1	430	PTGKSKKKKKKKKKQ	0.992846	Q86UE4	445	1	Q86UE4_445(m3_s2 : 0.8434112286468433)
a6	1026	MQMLKLDKENALDRA	0.992833	P06753	16	0	P06753_16(m3_s1 : 0.8741107050960676)
a6	762	IKKSPAVKVTHFKGC	0.992828	P25391	2264	0	P25391_2264(m2_s1 : 0.7834665284591641)
a1	435	LYHQPDDKKKNRGFC	0.992827	O43390	285	0	O60506_282(m3_s2 : 0.8433322474233954)
a1	391	SGDYNMAKAKMKNKQ	0.992823	O43768	74	0	O43768_74(m3_s2 : 0.8445694589958206)
a7	156	IYNVMSSKRVGICKG	0.992821	Q05BV3	1116	0	Q05BV3_1116(m1_s2 : 0.9928211571700112)
a1	53	KKKKKDRKKKKFQKS	0.992808	Q86X95	241	1	Q86X95_241(m3_s2 : 0.869982225900263)
a7	157	TEAPLNPKANREKMT	0.992793	P60709	113	0	P60709_113(m1_s2 : 0.9927925707330078)
a4	1041	DYNTCKLKGSVKCGS	0.992765	Q9Y3Q7	426	0	Q9Y3Q7_426(m2_s2 : 0.8096712667669606)
a7	158	LNTLVVKKSDVEAIF	0.992712	O60812	30	0	O60812_30(m1_s2 : 0.992711917907424)
a1	130	RSPHRSHKKSKKNKH	0.992701	O15042	1022	0	O15042_1022(m3_s2 : 0.8595434038811054)
a7	159	VNLNPEHKKGLKRKG	0.992665	Q9NR48	1911	0	Q9NR48_1911(m1_s2 : 0.9926646099234478)
a1	175	KRGKYKDKRRKKKKK	0.992654	Q66PJ3	294	1	Q66PJ3_294(m3_s2 : 0.8553116609910677)
a1	265	KAASGEAKPKAKKAG	0.992649	P16401	120	0	P16401_120(m3_s2 : 0.8491696234597251)
a7	160	DFLKESSKVVKKVPK	0.992626	Q2NL82	388	0	Q2NL82_388(m1_s2 : 0.9926258444919034)
a7	161	IRLTIPIKGKPFPIC	0.992603	Q8WZ42	31088	0	Q8WZ42_31088(m1_s2 : 0.9926032658728724)
a7	162	FAWEQGCKKDAFSLA	0.992549	Q9Y6K5	242	0	Q9Y6K5_242(m1_s2 : 0.9925493775810748)
a1	106	IFDPTMSKKKKKKKK	0.992549	P20042	14	1	P20042_14(m3_s2 : 0.862189110462153)
a1	361	QVAKEKKKKKKKKKA	0.992545	P51532	582	1	P51532_582(m3_s2 : 0.8456468576889238)
a4	1092	VSVKVTIKTICALIC	0.992536	O60934	160	0	O60934_160(m2_s2 : 0.8033107373612107)
a7	163	DTLWDIQKDLKDLAA	0.992529	P07195	329	0	P07195_329(m1_s2 : 0.9925294772412954)
a7	164	EKKNAAKKKCLYNFQ	0.992497	P78312	592	0	P78312_592(m1_s2 : 0.992496798484084)
a1	313	PVPGIKIKKKKKVLS	0.99246	Q96QC0	306	0	Q96QC0_306(m3_s2 : 0.847259230859433)
a5	46	CSKEQEFKSILFSLC	0.992437	Q96DT5	4078	0	Q96DT5_4078(m2_s2 : 0.7929249941831659)
a6	664	YYITGETKDQVANSA	0.992409	P07900	499	0	P07900_499(m2_s1 : 0.793294019284851)
a3	399	FAEQPSVKLCCQLCC	0.9924	Q6Q0C0	128	0	Q6Q0C0_128(m2_s4 : 0.8834361139869079)
a5	42	PYKLNLQKKKKKKKE	0.992394	Q14CX7	871	1	Q14CX7_871(m2_s2 : 0.793197449819191)
a2	691	NKQTPSGKKCIAAKK	0.992334	Q01780	850	0	Q01780_850(m2_s3 : 0.7167906623535725)
a7	165	VIRKNIVKKCLELFS	0.992301	P08238	410	0	P08238_410(m1_s2 : 0.992301137212853)
a6	852	SSTSDLPKRLASRKC	0.992279	P54868	447	0	P54868_447(m2_s1 : 0.7769662830427806)
a1	456	DSTTPEIKKDEKKKK	0.992261	Q9Y4C8	112	0	Q9Y4C8_112(m3_s2 : 0.8424249408981013)
a7	166	LKDIFSVKLKRRCSV	0.992219	Q49MI3	102	0	Q49MI3_102(m1_s2 : 0.9922188066003792)
a7	167	SKVVDSVKVCTARLF	0.992188	Q9H8T0	218	0	Q9H8T0_218(m1_s2 : 0.9921882346020718)
a7	168	LNIETAIKTKGVDEV	0.992182	P07355	47	0	P07355_47(m1_s2 : 0.9921821923392462)
a7	169	KYTDNSEKPSGKRLC	0.99218	Q6W2J9	1356	0	Q6W2J9_1356(m1_s2 : 0.9921804433748892)
a4	1102	RHKFQALKAEKCPHS	0.992163	Q13535	1600	0	Q13535_1600(m2_s2 : 0.802029054454835)
a1	55	RFKGDGVKYKAKLIG	0.99207	P98082	49	0	P98082_49(m3_s2 : 0.8697992910330196)
a1	506	HYMKHQKKGVHRCPK	0.992066	Q8ND82	467	0	Q8ND82_467(m3_s2 : 0.8408327741936846)
a4	1090	LYLLCSRKYEADPIG	0.992059	Q5GAN3	141	0	Q5GAN3_141(m2_s2 : 0.8034438110854301)

## Sheet: Table 7
Supplementary Table 7. SET8 ML-hybrid ensemble model predictions for the surface exposed human proteome, isolated for the top 500 predictions. Annotated to include ML score, and SET8 methylation score as determined in vitro with peptide arrays.
Array	Spot #	Peptide	ML Score	Uniprot ID	K Pos	Methylated by SET8 (0=no, 1=yes)	Annotation
aM	1	SAKKTPKKAKKPAAA	0.884562	P16403	157	0	P16403_157(m3_s2 : 0.8845621330216046)
aM	3	DSESPSQKKKKKKKK	0.880499	Q13428	1475	1	Q13428_1475(m3_s2 : 0.8804989812656627)
a1	32	LKRVAAPKHWMLDKL	0.878641	P62701	16	0	P62701_16(m3_s2 : 0.878641178377958)
a1	33	TYDPEGFKKRAACLC	0.877768	Q8NFP7	17	0	Q8NFP7_17(m3_s2 : 0.8777683579633283)
a1	34	TYDREGFKKRAACLC	0.877394	Q9NZJ9	18	0	Q9NZJ9_18(m3_s2 : 0.8773941407029625)
a1	35	KKAAGAGKVTKSAQK	0.876015	P68104	450	0	P68104_450(m3_s2 : 0.8760146568932098)
a1	36	HRQKQKHKDKWKHPE	0.87569	Q9P0U4	355	0	Q9P0U4_355(m3_s2 : 0.8756900179708178)
a1	37	AVTKAQKKDGKKRKR	0.875436	Q8N257	25	0	Q8N257_25(m3_s2 : 0.8754356205521959)
a1	38	APKKGSKKAVTKAQK	0.874926	P57053	17	0	P57053_17(m3_s2 : 0.8749263090734108)
a1	39	PKHWMLDKLTGVFAP	0.874926	P62701	22	0	P62701_22(m3_s2 : 0.8749255105043676)
a1	40	HLGFLPHKRSHRHRG	0.873539	Q92901	20	0	Q92901_20(m3_s2 : 0.8735392037523496)
a1	41	LFGGEVCKVIKKRGN	0.873037	P42166	685	0	P42166_685(m3_s2 : 0.8730365438218206)
a1	42	GRGKQGGKARAKAKT	0.872624	P0C0S8	10	0	P0C0S8_10(m3_s2 : 0.8726240065919318)
a1	43	PKLKKASKRMTCHKR	0.872543	Q9BVP2	11	0	Q9BVP2_11(m3_s2 : 0.8725429014590247)
a1	44	KAVTKAQKKDGKKRK	0.872434	Q8N257	24	0	Q8N257_24(m3_s2 : 0.8724337569596333)
a1	45	DKDHYRPKQKKKKKK	0.871516	A8MW92	567	1	A8MW92_567(m3_s2 : 0.8715164454507672)
a1	46	ESPSQKKKKKKKKTA	0.871187	Q13428	1477	1	Q13428_1477(m3_s2 : 0.8711872632171634)
a1	47	RDAKSIIKKKKHFKK	0.871173	Q03701	1033	1	Q03701_1033(m3_s2 : 0.8711731459995102)
a1	48	KHLTLNNKVQKKRWQ	0.870707	P23497	564	0	P23497_564(m3_s2 : 0.8707067872378778)
a1	49	RDLWRHNKSCARNRC	0.870306	Q1ZZU3	14	0	Q1ZZU3_14(m3_s2 : 0.8703064739081546)
a1	50	KLDRLEKKKKKKDRK	0.870231	Q86X95	234	1	Q86X95_234(m3_s2 : 0.8702311257937857)
a1	51	GLRLCRPKAKAKAKA	0.870002	P47914	122	0	P47914_122(m3_s2 : 0.8700024130741167)
a1	52	PKATPVKKAKKKLAA	0.869987	P07305	145	0	P07305_145(m3_s2 : 0.8699871599650805)
a1	53	KKKKKDRKKKKFQKS	0.869982	Q86X95	241	1	Q86X95_241(m3_s2 : 0.869982225900263)
a1	54	KKKHKKHKKHKKHKK	0.869816	Q7Z6E9	1742	1	Q7Z6E9_1742(m3_s2 : 0.8698156400636157)
a1	55	RFKGDGVKYKAKLIG	0.869799	P98082	49	0	P98082_49(m3_s2 : 0.8697992910330196)
a1	56	GKARAKAKTRSSRAG	0.869711	P0C0S8	16	0	P0C0S8_16(m3_s2 : 0.8697108669610962)
a1	57	MVVPAALKVVRLKPT	0.869115	P40429	125	0	P40429_125(m3_s2 : 0.8691145830718542)
a1	58	GLHTGPQKTKRKRKA	0.86801	Q9UKN7	69	0	Q9UKN7_69(m3_s2 : 0.8680095301346622)
a1	59	VKVVSSPKLAPKRKA	0.867639	O75152	665	0	O75152_665(m3_s2 : 0.8676391715760124)
aM	5	KKKGKKQKHCRRHKQ	0.867521	P30414	446	1	P30414_446(m3_s2 : 0.8675212562729795)
a1	61	TVAVGVIKAVDKKAA	0.867294	P68104	439	0	P68104_439(m3_s2 : 0.867293813746786)
a1	62	FVRVKPKKKKKKKKK	0.867119	Q9BVI0	543	1	Q9BVI0_543(m3_s2 : 0.8671192046183192)
a1	63	NSGPKAAKKKKRLLQ	0.867082	Q14692	20	0	Q14692_20(m3_s2 : 0.8670815710546619)
a1	64	AQKKDGKKRKRSRKE	0.867058	P33778	29	0	P33778_29(m3_s2 : 0.867058405670537)
a1	65	KGFLPETKKRKKRKS	0.86688	Q9BQG0	1179	0	Q9BQG0_1179(m3_s2 : 0.8668801058616452)
a1	66	EVVKLLNKVWKTDAA	0.866879	P53007	306	0	P53007_306(m3_s2 : 0.8668794443226918)
a1	67	SRYTYLEKAIKIHNA	0.866519	Q93009	1096	0	Q93009_1096(m3_s2 : 0.8665188219266152)
a1	68	SVLRCGKKKVWLDPN	0.866207	P84098	20	0	P84098_20(m3_s2 : 0.8662074697756982)
a1	69	AKYMAEVKKYKAHQC	0.865673	Q9BQ61	158	0	Q9BQ61_158(m3_s2 : 0.865673140353739)
a1	70	IHTPVSDKKKKKCSI	0.865665	Q15361	17	0	Q15361_17(m3_s2 : 0.8656649701781131)
a1	71	QGGKARAKAKTRSSR	0.865616	P0C0S8	14	0	P0C0S8_14(m3_s2 : 0.8656159941961592)
a1	72	YKDKRRKKKKKRKKL	0.865559	Q66PJ3	298	1	Q66PJ3_298(m3_s2 : 0.8655585531469465)
a1	73	FVTSDRSKNRKRHFN	0.865557	Q9UNX3	13	0	Q9UNX3_13(m3_s2 : 0.8655571785792999)
a1	74	NKNDPEKKKKKKDKE	0.865433	P29973	129	0	P29973_129(m3_s2 : 0.8654325394178389)
a1	75	KYKDKRRKKKKKRKK	0.865392	Q66PJ3	297	1	Q66PJ3_297(m3_s2 : 0.8653924314477389)
a1	76	RPSTGPHKLRECLPL	0.865285	P22090	37	0	P22090_37(m3_s2 : 0.8652853874314371)
a1	77	LSAKPPAKVEAKPKK	0.865276	P05114	31	0	P05114_31(m3_s2 : 0.8652762089625631)
a1	78	HKKKKKHKKSSKHKR	0.865272	Q9UKJ3	682	1	Q9UKJ3_682(m3_s2 : 0.8652719348963014)
a1	79	HTPVSDKKKKKCSIH	0.865151	Q15361	18	0	Q15361_18(m3_s2 : 0.8651510265340758)
a1	80	FDPTMSKKKKKKKKP	0.864924	P20042	15	1	P20042_15(m3_s2 : 0.8649244182527794)
a1	81	RITTRHKKQLKKCSV	0.864879	Q9BVJ6	763	0	Q9BVJ6_763(m3_s2 : 0.8648785131177441)
a1	82	KKEKCEYKKKAKNPK	0.864613	P38432	194	1	P38432_194(m3_s2 : 0.864612510503211)
a1	83	QAVLLPKKTESHHKA	0.864602	P0C0S8	120	0	P0C0S8_120(m3_s2 : 0.8646015922423645)
a1	83	QAVLLPKKTESHHKA	0.857852	Q96KK5	120	0	P0C0S8_120(m3_s2 : 0.8646015922423645)
a1	84	PSRSKPKKKSKKHKD	0.864598	P55199	450	0	P55199_450(m3_s2 : 0.8645975034464248)
a1	85	CNDRLGKKVRVKCNT	0.864477	Q9BZL1	13	0	Q9BZL1_13(m3_s2 : 0.8644773836210442)
a1	86	FLAQMEAKYCKSSKG	0.864269	Q8WXX5	241	0	Q8WXX5_241(m3_s2 : 0.864269322031203)
a1	87	EFVRVKPKKKKKKKK	0.864243	Q9BVI0	542	0	Q9BVI0_542(m3_s2 : 0.8642432340089079)
a1	88	AAATVTKKVAKSPKK	0.864151	P16403	169	0	P16403_169(m3_s2 : 0.8641510095576328)
a1	89	KAGRAYHKYKAKRNC	0.863936	P62917	188	0	P62917_188(m3_s2 : 0.8639360628108027)
a1	90	AARTPRSKKKKKLGA	0.863859	Q13428	1362	0	Q13428_1362(m3_s2 : 0.8638590208223242)
a1	91	KLKEKYEKDIAAYRA	0.863749	P09429	157	0	P09429_157(m3_s2 : 0.8637486103726723)
a1	92	FKEFVRVKPKKKKKK	0.863681	Q9BVI0	540	1	Q9BVI0_540(m3_s2 : 0.863680602778703)
a1	93	KKEKKKHKKHKKHKK	0.863624	Q7Z6E9	1739	1	Q7Z6E9_1739(m3_s2 : 0.8636244142389629)
a1	94	RIIKNEVKKLQKAAL	0.863266	P50914	128	0	P50914_128(m3_s2 : 0.8632663947987442)
a1	95	KPKATPVKKAKKKLA	0.863139	P07305	144	0	P07305_144(m3_s2 : 0.863139127185624)
a1	96	VRVKPKKKKKKKKKT	0.862889	Q9BVI0	544	1	Q9BVI0_544(m3_s2 : 0.8628890208961786)
a1	97	CGKHQPHKVTQYKKG	0.862796	P83881	22	0	P83881_22(m3_s2 : 0.8627962440477939)
a1	97	CGKHQPHKVTQYKKG	0.862453	Q969Q0	22	0	P83881_22(m3_s2 : 0.8627962440477939)
a1	98	QKHKHKKKKSKKNKD	0.862751	Q7Z6E9	1768	1	Q7Z6E9_1768(m3_s2 : 0.8627509705715681)
a1	99	VKPKIVKKRTKKFIR	0.862576	P62910	15	0	P62910_15(m3_s2 : 0.8625763275102765)
a1	100	ESTSPSDKVVKKGKK	0.862412	Q8NE71	26	0	Q8NE71_26(m3_s2 : 0.8624123580551202)
a1	101	DHYRPKQKKKKKKKK	0.862384	A8MW92	569	1	A8MW92_569(m3_s2 : 0.8623843223633224)
a1	102	PVKKLVVKGGKKKKQ	0.862344	P35268	10	1	P35268_10(m3_s2 : 0.8623442625411307)
a1	103	LNKNGTVKKVSKLKR	0.862324	Q9H0E3	1037	0	Q9H0E3_1037(m3_s2 : 0.862323939659296)
a1	104	IQAVLLPKKTESHHK	0.862225	P0C0S8	119	0	P0C0S8_119(m3_s2 : 0.8622248654300253)
a1	105	NHDKCKPKKCRQECK	0.862219	P61221	19	0	P61221_19(m3_s2 : 0.8622188547544251)
a1	106	IFDPTMSKKKKKKKK	0.862189	P20042	14	1	P20042_14(m3_s2 : 0.862189110462153)
a1	107	DLGLPEKKKKKKVVK	0.862033	Q1ED39	16	0	Q1ED39_16(m3_s2 : 0.8620334877985287)
a1	108	IIKRFEQKGFRLVAM	0.862001	P22392	31	0	P22392_31(m3_s2 : 0.8620008627297479)
a1	109	DFQKVKLKVGKKKPK	0.861857	Q9NXF1	17	1	Q9NXF1_17(m3_s2 : 0.8618571372452083)
a1	110	ALAKRKAKAWSDCPQ	0.86184	Q6ZU35	1223	0	Q6ZU35_1223(m3_s2 : 0.8618403367771544)
a1	111	IKSKKYHKVVKKGKA	0.861761	Q9BVJ6	254	0	Q9BVJ6_254(m3_s2 : 0.8617611083311378)
a1	111	IKSKKYHKVVKKGKA	0.852061	Q5TAP6	253	0	Q9BVJ6_254(m3_s2 : 0.8617611083311378)
a1	112	LKHNSKVKHKKKHYK	0.861441	O60353	538	0	O60353_538(m3_s2 : 0.8614411215367868)
a1	113	GPHLPNKKKHKKQAV	0.861239	P20810	24	0	P20810_24(m3_s2 : 0.8612390885714997)
a1	114	AALKFLAKCRKKKKL	0.861236	Q15051	433	0	Q15051_433(m3_s2 : 0.8612356307116222)
a1	115	PKQKKKKKKKKKSKQ	0.861035	A8MW92	573	1	A8MW92_573(m3_s2 : 0.861034552402047)
a1	116	KKKKKEKKKHKKHKK	0.860862	Q7Z6E9	1736	1	Q7Z6E9_1736(m3_s2 : 0.8608615901460744)
a1	117	KRKKDKEKKEKKKKA	0.860771	Q13428	1454	0	Q13428_1454(m3_s2 : 0.8607711662436711)
a1	118	FSRFYSLKVAPKVKA	0.860766	P22695	17	0	P22695_17(m3_s2 : 0.8607656683438513)
a1	119	PKKSQVLKSCRKKKG	0.860657	Q69YH5	560	0	Q69YH5_560(m3_s2 : 0.8606571792360935)
a1	120	KKHKKSSKHKRKHKA	0.860617	Q9UKJ3	686	0	Q9UKJ3_686(m3_s2 : 0.8606172488805442)
a1	121	FTALNASKEKKKKKY	0.860246	Q9NPG3	232	1	Q9NPG3_232(m3_s2 : 0.8602461551098352)
a1	122	HDKCKPKKCRQECKK	0.860244	P61221	20	1	P61221_20(m3_s2 : 0.8602444984585057)
a1	123	LSTSGAIKKKKKKKE	0.860175	Q9UPV0	110	0	Q9UPV0_110(m3_s2 : 0.860175189716838)
a1	124	PVKTLTRKKNKKKKR	0.860127	Q9GZR2	29	1	Q9GZR2_29(m3_s2 : 0.8601273346436556)
a1	125	ELAKRKVKKKKRKKK	0.859993	Q6ZQX7	86	1	Q6ZQX7_86(m3_s2 : 0.8599926803692236)
a1	126	CGLWVRRKAGYKKKL	0.859931	Q9NZE8	126	0	Q9NZE8_126(m3_s2 : 0.8599310603836529)
a1	127	NLASCYLKQGKFKQA	0.859922	Q07866	393	0	Q07866_393(m3_s2 : 0.8599224838729449)
a1	128	SGKSHRHKKKKKHKK	0.859887	Q9UKJ3	676	1	Q9UKJ3_676(m3_s2 : 0.8598868731381392)
a1	129	ETSWESPKQIKKKKK	0.859629	Q86UE4	570	0	Q86UE4_570(m3_s2 : 0.8596287681061798)
a1	130	RSPHRSHKKSKKNKH	0.859543	O15042	1022	0	O15042_1022(m3_s2 : 0.8595434038811054)
a1	131	ASKWDYEKNEWKKAA	0.859504	P13073	164	0	P13073_164(m3_s2 : 0.8595038520030764)
a1	132	PGGDMAAKMSKKKKA	0.859397	P20648	25	1	P20648_25(m3_s2 : 0.8593966464452133)
a1	133	NFAELKIKRLRKKFA	0.859357	P18124	31	0	P18124_31(m3_s2 : 0.8593573464681955)
a1	134	TLQRAALKFLAKCRK	0.859046	Q15051	429	0	Q15051_429(m3_s2 : 0.8590464956766343)
a1	135	DVDRDAKKLNKACKG	0.859042	P27216	22	0	P27216_22(m3_s2 : 0.8590418805405189)
a1	136	VDQKCEHKLWKARLS	0.858992	Q14008	19	0	Q14008_19(m3_s2 : 0.8589918294943182)
a1	137	TVKAKPVKASKPKKA	0.858961	P07305	169	0	P07305_169(m3_s2 : 0.8589605171479008)
a1	138	TLEETLVKKKKKKDS	0.858518	Q96BK5	320	0	Q96BK5_320(m3_s2 : 0.858518367252826)
a1	139	RQKFLRVKRSAICIQ	0.85826	O00159	758	0	O00159_758(m3_s2 : 0.8582597493219236)
a1	140	HYRPKQKKKKKKKKK	0.858244	A8MW92	570	1	A8MW92_570(m3_s2 : 0.8582435956307423)
a1	141	ELNKLLGKVTIAQGG	0.858154	P0C0S8	100	0	P0C0S8_100(m3_s2 : 0.8581536272631795)
a1	142	ETNKPHSKSKKRHLD	0.858069	Q14669	110	0	Q14669_110(m3_s2 : 0.8580686860069248)
a1	143	WIWACIRKRRLVAPC	0.857977	P49916	1002	0	P49916_1002(m3_s2 : 0.8579773291627333)
a1	144	IKPGRKRKKHKKHFK	0.857886	Q709C8	154	0	Q709C8_154(m3_s2 : 0.8578855774718184)
a1	145	KQKKRSHKKQKKSKK	0.857812	Q6ZUT1	167	0	Q6ZUT1_167(m3_s2 : 0.8578116733875135)
a1	146	LVKPKIVKKRTKKFI	0.857533	P62910	14	0	P62910_14(m3_s2 : 0.8575327476400074)
a1	147	PAWLALAKRKAKAWS	0.857528	Q6ZU35	1219	0	Q6ZU35_1219(m3_s2 : 0.8575278515777717)
a1	148	GLAEEIQKYCCSRKA	0.857493	P53004	290	0	P53004_290(m3_s2 : 0.8574925354018369)
a1	149	LKQTSRKKKKEKKKK	0.857482	Q9H7Z3	82	1	Q9H7Z3_82(m3_s2 : 0.8574820192561197)
a1	150	CKYKECNKRFLCSKA	0.857407	Q13129	1371	0	Q13129_1371(m3_s2 : 0.8574073725995855)
a1	151	FLAKCRKKKKLFAPW	0.857341	Q15051	437	0	Q15051_437(m3_s2 : 0.8573408446019322)
a1	152	MKADASKKLLKKKKG	0.857299	Q02880	1256	1	Q02880_1256(m3_s2 : 0.857299385964831)
a1	153	QYVPFGGKRLCALKG	0.857112	Q13009	1420	0	Q13009_1420(m3_s2 : 0.8571123039071484)
a1	154	EEKEALVKLLLKLDC	0.856974	Q9BQI6	25	0	Q9BQI6_25(m3_s2 : 0.8569740150671991)
a1	155	PKSKKEKKKSDKRKK	0.856921	Q13428	1443	1	Q13428_1443(m3_s2 : 0.8569208437263814)
a1	156	TYSLVPKKKTKVLKQ	0.856801	Q9H9B1	302	0	Q9H9B1_302(m3_s2 : 0.8568008533500455)
a1	157	HKKHKKHKKHKKHAG	0.856662	Q7Z6E9	1745	1	Q7Z6E9_1745(m3_s2 : 0.8566623588086134)
a1	158	LCPPPVKKRKRKCLL	0.856662	P63000	184	0	P63000_184(m3_s2 : 0.8566617585972063)
a1	159	ERHKEKKKKKKKKSE	0.856597	Q9H8M2	68	0	Q9H8M2_68(m3_s2 : 0.8565968375762694)
a1	160	VFKEENQKGDKKLRC	0.856513	Q9NYF8	681	0	Q9NYF8_681(m3_s2 : 0.856512852780963)
a1	161	PKKTAKSKKKKPLKK	0.8562	Q9UGP8	527	1	Q9UGP8_527(m3_s2 : 0.8561995701861169)
a1	162	RAKKYLCKVKAACKI	0.856097	Q8IZT6	2954	0	Q8IZT6_2954(m3_s2 : 0.856097101446986)
a1	163	PLATGGIKKSGKKAA	0.85608	Q9Y2S6	59	0	Q9Y2S6_59(m3_s2 : 0.8560796511330647)
a1	164	GKKRYDCKECGKTFS	0.856074	Q9H7R0	184	0	Q9H7R0_184(m3_s2 : 0.856073628140348)
a1	165	SNFKSPVKTIRAAAA	0.856053	P67870	212	0	P67870_212(m3_s2 : 0.8560528241613675)
a1	166	AVGKSSSKKKKKFHK	0.85602	O00567	582	0	O00567_582(m3_s2 : 0.8560201248491636)
a1	167	LYKEERKKKSKDRPS	0.855923	Q6UB99	767	0	Q6UB99_767(m3_s2 : 0.8559229048450275)
a1	168	EWILEAIKKVKKQKQ	0.855893	Q92794	18	0	Q92794_18(m3_s2 : 0.8558932454045345)
a1	169	RAGRKAVKRFLKQEC	0.855782	P09544	199	0	P09544_199(m3_s2 : 0.855782317002685)
a1	170	PNDKHRSKKCKDPKP	0.855667	Q9ULH7	280	0	Q9ULH7_280(m3_s2 : 0.8556674188824633)
a1	171	RGATGSFKLVPKHKK	0.855531	Q8IZA3	126	0	Q8IZA3_126(m3_s2 : 0.855530681283039)
a1	172	SKKKKKKKEKKKHKK	0.855461	Q7Z6E9	1733	1	Q7Z6E9_1733(m3_s2 : 0.8554608319269514)
a1	173	GQGSKVIKKVKKKKE	0.85544	Q8NCQ7	234	0	Q8NCQ7_234(m3_s2 : 0.8554397581838645)
a1	174	FKDEKSLKRIKDTNK	0.855379	Q6UB99	719	0	Q6UB99_719(m3_s2 : 0.8553794890708744)
a1	175	KRGKYKDKRRKKKKK	0.855312	Q66PJ3	294	1	Q66PJ3_294(m3_s2 : 0.8553116609910677)
a1	176	LEAKQEPKQSKKLKN	0.855281	Q9H0A0	1003	0	Q9H0A0_1003(m3_s2 : 0.8552813571262261)
a1	177	DPKKPRGKMSSYAFF	0.855259	P09429	12	0	P09429_12(m3_s2 : 0.8552589810661255)
a1	178	NVLDMEVKKKKHDKQ	0.855246	Q9HCM1	1388	0	Q9HCM1_1388(m3_s2 : 0.8552462771561548)
a1	179	ATPKKSIKKTPKKVK	0.855146	P16402	153	0	P16402_153(m3_s2 : 0.855145806200963)
a1	180	LDPENPTKSCKSRGS	0.855024	P18621	13	0	P18621_13(m3_s2 : 0.8550244845385347)
a1	181	VNFAEFSKKCSERWK	0.85485	O15347	43	0	O15347_43(m3_s2 : 0.854850309181445)
a1	182	GNKEDSLKKIKRTPS	0.854748	Q03164	254	0	Q03164_254(m3_s2 : 0.8547477785130964)
a1	183	PVSELITKAVAASKE	0.854467	P10412	46	0	P10412_46(m3_s2 : 0.8544672233911073)
a1	184	VLCPPPVKKRKRKCL	0.854447	P63000	183	0	P63000_183(m3_s2 : 0.854446700754493)
a1	185	VGKSSSKKKKKFHKA	0.854365	O00567	583	0	O00567_583(m3_s2 : 0.8543652444905679)
a1	186	GVTSLTQKKVLRAPC	0.854281	Q5BJF6	26	0	Q5BJF6_26(m3_s2 : 0.8542809681240883)
a1	187	ESGEKSKKRKKRKRK	0.854095	Q9UKJ3	710	1	Q9UKJ3_710(m3_s2 : 0.8540952679348726)
a1	188	LKKKISDKCRKKNIC	0.853886	O14802	149	1	O14802_149(m3_s2 : 0.8538857460555012)
a1	189	CRLFTSEKMVKAIKK	0.853678	Q8IZT6	777	0	Q8IZT6_777(m3_s2 : 0.8536784043912797)
a1	190	RWKTMSAKEKGKFED	0.853392	P09429	55	0	P09429_55(m3_s2 : 0.8533919462954334)
a1	191	LPCNCGAKKCRKFLN	0.853388	Q03164	3962	0	Q03164_3962(m3_s2 : 0.8533883275598808)
a1	192	TPKKSAKKTPKKAKK	0.853307	P10412	153	1	P10412_153(m3_s2 : 0.8533065735721547)
a1	192	TPKKSAKKTPKKAKK	0.850752	P16403	153	1	P10412_153(m3_s2 : 0.8533065735721547)
a1	193	QKKKISQKKLKKQKL	0.853201	P18621	173	1	P18621_173(m3_s2 : 0.853201049182006)
a1	194	DDPKASAKKKMKSKK	0.8532	Q1ED39	267	1	Q1ED39_267(m3_s2 : 0.8531997503495758)
a1	195	PSHGPLDKWRVLHSA	0.853165	Q96L21	208	0	Q96L21_208(m3_s2 : 0.8531646022356582)
a1	196	LEETLVKKKKKKDSK	0.853123	Q96BK5	321	0	Q96BK5_321(m3_s2 : 0.8531232146099901)
a1	197	RKKKKKRKKLKKKGK	0.853097	Q66PJ3	303	1	Q66PJ3_303(m3_s2 : 0.853096892727023)
a1	198	LVPENLLKKRKAYQA	0.853085	Q6DKI1	27	0	Q6DKI1_27(m3_s2 : 0.8530845734661803)
a1	199	HRDGGGSKKKKKRSR	0.853019	Q9H7N4	641	0	Q9H7N4_641(m3_s2 : 0.853019253822362)
a1	200	QSIDEIYKYDKKQQQ	0.853007	Q92905	30	0	Q92905_30(m3_s2 : 0.8530072857769858)
a1	201	GKTFYSKKDRPLCKS	0.85299	Q9NR12	444	0	Q9NR12_444(m3_s2 : 0.8529903815584217)
a1	202	QEYEEGGKQCVERKC	0.852826	O96019	421	0	O96019_421(m3_s2 : 0.852826465979844)
a1	203	PKKKKKKKKKTKPEC	0.852823	Q9BVI0	548	1	Q9BVI0_548(m3_s2 : 0.8528227969440962)
a1	204	EKDKKEKKKEKHKRK	0.852793	O60885	547	1	O60885_547(m3_s2 : 0.8527934054377969)
a1	205	FTSSEPAKVCAAIRK	0.85277	O15297	137	0	O15297_137(m3_s2 : 0.8527695943605674)
a1	206	RKIKISVKKKVKLEV	0.852769	Q5VZK9	29	0	Q5VZK9_29(m3_s2 : 0.8527689550692621)
a1	207	RSPTPKQKKKKKKKD	0.852739	Q9UQ35	188	1	Q9UQ35_188(m3_s2 : 0.8527394977941078)
a1	208	ATQSPISKKRKKKGF	0.852538	Q9BQG0	1167	0	Q9BQG0_1167(m3_s2 : 0.8525383874427398)
a1	209	RKKDKEKKEKKKKAK	0.852504	Q13428	1455	0	Q13428_1455(m3_s2 : 0.852504336403174)
a1	210	FHVIRINKMLSCAGA	0.852413	Q96L21	101	0	Q96L21_101(m3_s2 : 0.8524129045325538)
a1	211	GLVGEIIKRFEQKGF	0.852395	P22392	26	0	P22392_26(m3_s2 : 0.8523945208243446)
a1	212	SPREHNGKVKKKKKI	0.852283	Q1ED39	211	1	Q1ED39_211(m3_s2 : 0.8522825227711603)
a1	213	QLLGPTHKKKSKKKK	0.852162	Q15361	272	1	Q15361_272(m3_s2 : 0.8521619967586633)
a1	214	DYYKSYIKTCLDNLA	0.85212	P46940	1532	0	P46940_1532(m3_s2 : 0.8521198923719626)
a1	215	DKRRKKKKKRKKLKK	0.852118	Q66PJ3	300	1	Q66PJ3_300(m3_s2 : 0.8521184080240862)
a1	216	IKDLLRSKRKLKKRC	0.852115	Q5T8A7	704	0	Q5T8A7_704(m3_s2 : 0.8521146273410276)
a1	217	FSKKPSGKKTCTFCK	0.851915	Q14202	350	0	Q14202_350(m3_s2 : 0.8519153978652285)
a1	218	FDVDRDAKKLNKACK	0.85179	P27216	21	0	P27216_21(m3_s2 : 0.8517902801472043)
a1	219	KRARAEKKALKKKKK	0.851723	Q15020	609	1	Q15020_609(m3_s2 : 0.8517227838290867)
a1	220	DVDTPPRKKKRKHRL	0.851689	Q15910	491	0	Q15910_491(m3_s2 : 0.8516892518807729)
a1	221	VLKSCRKKKGKGKKS	0.851597	Q69YH5	565	1	Q69YH5_565(m3_s2 : 0.8515968493966128)
a1	222	RKASHTPKKWPKKPK	0.851543	O76021	478	0	O76021_478(m3_s2 : 0.8515430689244916)
a1	223	RTKIDWNKILSYKIG	0.85154	P52907	273	0	P52907_273(m3_s2 : 0.8515397703536822)
a1	224	KHSKEKKKSSKKTKC	0.851537	Q8IYX8	245	1	Q8IYX8_245(m3_s2 : 0.8515369628043221)
a1	225	LKPTCGRKVSLPNKA	0.851332	Q9BXX2	658	0	Q9BXX2_658(m3_s2 : 0.851331731469196)
a1	225	LKPTCGRKVSLPNKA	0.848004	Q9BXX2	624	0	Q9BXX2_658(m3_s2 : 0.851331731469196)
a1	226	KKAAVGVKKQKKPLV	0.851305	P36578	390	0	P36578_390(m3_s2 : 0.8513048421928789)
a1	227	AQPKAQNKRKRCLFG	0.851198	Q6PJG2	12	0	Q6PJG2_12(m3_s2 : 0.8511984971756315)
a1	228	QHPKFAAKRRWTCSK	0.851158	Q9Y6X0	529	0	Q9Y6X0_529(m3_s2 : 0.8511583125546655)
a1	229	YVKIRSRKLGIFRRC	0.851097	Q6PKX4	20	0	Q6PKX4_20(m3_s2 : 0.8510973836691833)
a1	230	SSTPEEVKKRKKAVL	0.851093	P23528	30	0	P23528_30(m3_s2 : 0.8510930826065856)
a1	231	KSHKKKQKKRSHKKQ	0.850994	Q6ZUT1	162	1	Q6ZUT1_162(m3_s2 : 0.850994102043523)
a1	232	FKRTLSKKEKKEKKK	0.850953	P55196	164	0	P55196_164(m3_s2 : 0.8509534569657835)
a1	233	FYQRVAKKDCIKKWI	0.85094	Q86Y07	83	0	Q86Y07_83(m3_s2 : 0.8509398089690646)
a1	234	VKHKKKGKKQKHCRR	0.850783	P30414	443	1	P30414_443(m3_s2 : 0.850783134512879)
a1	235	SSPRRERKKSSKKKK	0.850762	Q9UQ35	210	1	Q9UQ35_210(m3_s2 : 0.8507619801808971)
a1	236	TPKKNKHKRKKVKLA	0.850689	P62979	94	0	P62979_94(m3_s2 : 0.8506890311449044)
a1	237	HRLVVPKKGKISDLC	0.850584	P51784	519	0	P51784_519(m3_s2 : 0.8505837838574731)
a1	238	EVYEYWIKKRKNCRG	0.850544	Q9H2F5	180	0	Q9H2F5_180(m3_s2 : 0.8505444340400754)
a1	239	RKHKKSKKSHKKKQK	0.850379	Q6ZUT1	155	1	Q6ZUT1_155(m3_s2 : 0.8503788957439826)
a1	240	HLGLLEKKKDYKLRA	0.850376	Q9Y3A2	34	0	Q9Y3A2_34(m3_s2 : 0.8503763479721159)
a1	241	YRPKQKKKKKKKKKS	0.850203	A8MW92	571	1	A8MW92_571(m3_s2 : 0.8502029237577324)
a1	242	HRKTPSKKKLVATKT	0.850202	Q5T8A7	426	0	Q5T8A7_426(m3_s2 : 0.8502019671278553)
a1	243	PTMSKKKKKKKKPFM	0.850044	P20042	17	1	P20042_17(m3_s2 : 0.8500442605648585)
a1	244	SPKVQAVKDWANQRC	0.850044	P38432	209	0	P38432_209(m3_s2 : 0.8500436939375168)
a1	245	QGSKVIKKVKKKKEK	0.850026	Q8NCQ7	235	1	Q8NCQ7_235(m3_s2 : 0.850026152682614)
a1	246	RHKKKKHKHRSKHKK	0.849938	Q13523	49	1	Q13523_49(m3_s2 : 0.8499376511401329)
a1	247	SSKKKNKKMVKKSKP	0.849876	Q9H1E3	155	1	Q9H1E3_155(m3_s2 : 0.8498759343136395)
a1	248	IKHKGIRKVYACSHC	0.849835	Q9HCE3	1083	0	Q9HCE3_1083(m3_s2 : 0.8498349643694172)
a1	249	SQKTASLKKRKKMRV	0.849793	Q14684	594	0	Q14684_594(m3_s2 : 0.8497926612071806)
a1	250	AQETDIFKKKKRKGQ	0.849729	Q8NDD1	239	0	Q8NDD1_239(m3_s2 : 0.8497293572573185)
a1	251	KMPEMNIKAPKISMP	0.849713	Q09666	2575	0	Q09666_2575(m3_s2 : 0.8497130937118751)
a1	252	FVIGNGNKPWISLPR	0.849679	P22090	233	0	P22090_233(m3_s2 : 0.8496787233913425)
a1	253	DIHGPEGKLKGPKFK	0.849659	Q09666	4575	0	Q09666_4575(m3_s2 : 0.849659152716662)
a1	254	CGKEIKKKKCIFRLR	0.849655	Q5T6S3	333	0	Q5T6S3_333(m3_s2 : 0.8496548978422005)
a1	255	PEELVDYKSCAHDWV	0.84964	P22392	143	0	P22392_143(m3_s2 : 0.8496400724300146)
a1	256	HSGEKPYKCSKCPRA	0.849629	Q9BUG6	469	0	Q9BUG6_469(m3_s2 : 0.8496287940413653)
a1	257	VSKKEERKRTKKKKE	0.849562	Q9NPI7	233	0	Q9NPI7_233(m3_s2 : 0.8495622827672579)
a1	258	PAEKTPVKKKARKSA	0.849522	P10412	21	0	P10412_21(m3_s2 : 0.8495220275017621)
a1	259	GLKSLVSKGTLVQTK	0.849451	P16401	93	0	P16401_93(m3_s2 : 0.8494506558414164)
a1	260	IPDGCGVKYVPSHGP	0.849316	Q96L21	198	0	Q96L21_198(m3_s2 : 0.8493157537191679)
a1	261	PYILTLRKKWKDCKL	0.849305	Q13621	934	0	Q13621_934(m3_s2 : 0.8493045277675979)
a1	262	NIGKVNKKSNKKRIC	0.849285	Q03188	793	1	Q03188_793(m3_s2 : 0.8492850275531523)
a1	263	SESKPPKKKKKKRRQ	0.849284	Q5T3I0	204	0	Q5T3I0_204(m3_s2 : 0.8492840043495322)
a1	264	ENDGPVKKKVKKVQQ	0.849176	P20585	99	0	P20585_99(m3_s2 : 0.8491761169665666)
a1	265	KAASGEAKPKAKKAG	0.84917	P16401	120	0	P16401_120(m3_s2 : 0.8491696234597251)
a1	266	KLKSVSFKQKRKLDQ	0.84907	Q9HCM1	1372	0	Q9HCM1_1372(m3_s2 : 0.849070496100092)
a1	267	KSRFLCGKEIKKKKC	0.849041	Q5T6S3	328	0	Q5T6S3_328(m3_s2 : 0.8490407273751089)
a1	268	DLALRGKKKRKKFMK	0.848955	Q96GQ7	679	1	Q96GQ7_679(m3_s2 : 0.8489548694390319)
a1	269	STVLSSLKEKHKHKC	0.848935	Q9NR48	1245	0	Q9NR48_1245(m3_s2 : 0.8489354914549571)
a1	270	RSPTPKSKRKSKDKK	0.84875	Q9UQ35	237	0	Q9UQ35_237(m3_s2 : 0.8487504078961547)
a1	271	TPSTCGVKPHRYRPG	0.848749	Q6NXT2	37	0	Q6NXT2_37(m3_s2 : 0.8487486525934794)
a1	272	QKEKHHVKMKAKRCA	0.848682	Q9ULW0	139	0	Q9ULW0_139(m3_s2 : 0.8486818203993968)
a1	273	LPTGKSKKKKKKKKK	0.848644	Q86UE4	444	1	Q86UE4_444(m3_s2 : 0.8486443605920695)
a1	274	LKAANNKKGKKFKLR	0.848644	Q9UKI2	16	1	Q9UKI2_16(m3_s2 : 0.8486440111368316)
a1	275	AARICANKYMVKSCG	0.848585	Q96L21	74	0	Q96L21_74(m3_s2 : 0.8485853811549807)
a1	276	LFGKIFQKDSSRCKL	0.848538	Q96RJ0	326	0	Q96RJ0_326(m3_s2 : 0.8485384474643894)
a1	277	KRITTRHKKQLKKCS	0.848529	Q9BVJ6	762	1	Q9BVJ6_762(m3_s2 : 0.8485293110086969)
a1	278	FAQKMLRKARRKLIY	0.848478	P18124	44	0	P18124_44(m3_s2 : 0.8484775861777069)
a1	279	FKVEDAIKVLQCHKP	0.84846	Q8NFP7	127	0	Q8NFP7_127(m3_s2 : 0.8484598716833741)
a1	279	FKVEDAIKVLQCHKP	0.847514	Q96G61	127	0	Q8NFP7_127(m3_s2 : 0.8484598716833741)
a1	280	EEPALKRKKKKKRKE	0.848413	Q1ED39	289	1	Q1ED39_289(m3_s2 : 0.8484134980067641)
a1	281	CRKTPRGKRGWKSFH	0.848406	A5PKW4	780	0	A5PKW4_780(m3_s2 : 0.8484057545091667)
a1	282	NPPSPSPKKRKRHLV	0.848381	B4DYI2	60	0	B4DYI2_60(m3_s2 : 0.848380963479581)
a1	283	YSGALSVKEMLKKFQ	0.848373	Q9NPG3	246	0	Q9NPG3_246(m3_s2 : 0.8483726336922393)
a1	284	LPQEEEVKAKRQRKS	0.84834	Q9Y6X0	1580	0	Q9Y6X0_1580(m3_s2 : 0.8483400020796588)
a1	285	KKHKHKHKHKKHKRK	0.848308	Q13523	74	1	Q13523_74(m3_s2 : 0.8483077748450787)
a1	286	QFLEKINKNCWRIKK	0.848306	Q9Y3I0	17	0	Q9Y3I0_17(m3_s2 : 0.8483060682297201)
a1	287	EGPHLPNKKKHKKQA	0.84828	P20810	23	0	P20810_23(m3_s2 : 0.8482799227325007)
a1	288	GAYGREKKRCKLLGK	0.848278	P46100	1092	0	P46100_1092(m3_s2 : 0.8482780959180208)
a1	289	RERHKEKKKKKKKKS	0.848264	Q9H8M2	67	1	Q9H8M2_67(m3_s2 : 0.8482638653495372)
a1	290	LAKRKVKKKKRKKKT	0.848246	Q6ZQX7	87	1	Q6ZQX7_87(m3_s2 : 0.8482462242976656)
a1	291	DDDLPISKKKKRRKG	0.84822	Q6PD62	933	0	Q6PD62_933(m3_s2 : 0.8482196018425178)
a1	292	FLCGKEIKKKKCIFR	0.848203	Q5T6S3	331	1	Q5T6S3_331(m3_s2 : 0.8482026865876102)
a1	293	SIHIVIPKGTFKPPC	0.848142	Q8NEZ4	4368	0	Q8NEZ4_4368(m3_s2 : 0.8481423646933843)
a1	294	ENDGYFRKGCNPLAQ	0.848115	Q8IUC4	23	0	Q8IUC4_23(m3_s2 : 0.8481152501248745)
a1	295	QKKKSIEKKRKKSKG	0.848012	Q5T200	1005	1	Q5T200_1005(m3_s2 : 0.8480124307360482)
a1	296	DKAKNSLKRKARNRC	0.847946	Q8IZQ8	65	1	Q8IZQ8_65(m3_s2 : 0.84794599437159)
a1	297	FQTKEERKKEKIAKA	0.847929	Q96GQ7	660	0	Q96GQ7_660(m3_s2 : 0.8479290787688244)
a1	298	PKLDKEGKVVKKHKT	0.847875	Q6UB99	627	0	Q6UB99_627(m3_s2 : 0.8478750547097466)
a1	299	TLREILKKKSKPCLI	0.84787	O95785	1274	0	O95785_1274(m3_s2 : 0.8478695491759785)
a1	300	VVDSLYNKAKKLTAA	0.847832	O00231	417	0	O00231_417(m3_s2 : 0.8478315860129468)
a1	301	MNVTPEVKSRGMKFA	0.847725	Q5T3I0	8	0	Q5T3I0_8(m3_s2 : 0.8477250335201377)
a1	302	CHNGEKSKKPSKIKS	0.84772	Q9P246	732	0	Q9P246_732(m3_s2 : 0.8477196772240724)
a1	303	LEKKKKKKDRKKKKF	0.847663	Q86X95	238	1	Q86X95_238(m3_s2 : 0.84766302125294)
a1	304	AKLSFERKKQGCNKR	0.847661	Q03468	286	0	Q03468_286(m3_s2 : 0.8476614444828906)
a1	305	RLYGKLAKVAKSNKC	0.847579	Q9NWS1	553	0	Q9NWS1_553(m3_s2 : 0.8475788537417208)
a1	306	KYMAEVKKYKAHQCG	0.847544	Q9BQ61	159	0	Q9BQ61_159(m3_s2 : 0.8475443241035419)
a1	307	FIGFEGVKGKKKMSA	0.847544	P15924	2702	0	P15924_2702(m3_s2 : 0.8475439524680283)
a1	308	NNLASEVKYKADLKK	0.847387	P20929	5831	1	P20929_5831(m3_s2 : 0.8473870190084862)
a1	309	QQLFLALKLLKRCNI	0.847323	Q13523	804	0	Q13523_804(m3_s2 : 0.8473234911180217)
a1	310	GSDYSPNKKKKKKLK	0.847304	Q8TDI0	97	1	Q8TDI0_97(m3_s2 : 0.8473042788237881)
a1	311	PSCWGKKKKKKKRTP	0.847282	Q99569	790	1	Q99569_790(m3_s2 : 0.8472823084306891)
a1	312	LVYKENCKLKKKLPS	0.847263	Q8IVF5	1368	1	Q8IVF5_1368(m3_s2 : 0.847263141291924)
a1	313	PVPGIKIKKKKKVLS	0.847259	Q96QC0	306	0	Q96QC0_306(m3_s2 : 0.847259230859433)
a1	314	AMPSDLAKKKAAKKK	0.847252	Q9UG63	7	0	Q9UG63_7(m3_s2 : 0.8472521941017959)
a1	315	EEETRVGKKLKKHKK	0.847251	Q1ED39	146	0	Q1ED39_146(m3_s2 : 0.8472514644071257)
a1	316	ALPTGKSKKKKKKKK	0.847222	Q86UE4	443	1	Q86UE4_443(m3_s2 : 0.8472224496418029)
a1	317	DTLREILKKKSKPCL	0.847153	O95785	1273	0	O95785_1273(m3_s2 : 0.8471526427426467)
a1	318	RELKPNKKYSWMRKK	0.84715	O15417	1455	0	O15417_1455(m3_s2 : 0.8471498459187299)
a1	319	DKKATAQKLKKKHKK	0.847144	Q6ZQQ6	1187	1	Q6ZQQ6_1187(m3_s2 : 0.8471435608720653)
a1	320	RHKEKKKKKKKKSEK	0.847131	Q9H8M2	69	1	Q9H8M2_69(m3_s2 : 0.8471305342872456)
a1	321	AVKKDAKKVVAKPKE	0.847123	Q8WZ42	9922	0	Q8WZ42_9922(m3_s2 : 0.8471233693183043)
a1	322	CIKTLLEKKKRVQLK	0.847102	P78344	238	0	P78344_238(m3_s2 : 0.8471018081026985)
a1	323	EYAKLLAKRMKEAKE	0.847095	P62753	215	0	P62753_215(m3_s2 : 0.8470951565916953)
a1	324	AGVSTVQKAKKKQKK	0.846939	Q5T3I0	437	1	Q5T3I0_437(m3_s2 : 0.8469388521254746)
a1	325	KEDTSPKKKKKKLRQ	0.846931	Q99549	152	1	Q99549_152(m3_s2 : 0.8469314659683163)
a1	326	FDLALRGKKKRKKFM	0.8469	Q96GQ7	678	1	Q96GQ7_678(m3_s2 : 0.846900455691055)
a1	327	PRLKNLHKVSPSLKG	0.846852	O96013	540	0	O96013_540(m3_s2 : 0.846851614257573)
a1	328	FLKSLTTKQKQKLLR	0.846833	Q86X95	219	0	Q86X95_219(m3_s2 : 0.8468325893062164)
a1	329	TGTTPPVKKKPKLLN	0.846832	Q96ST3	439	0	Q96ST3_439(m3_s2 : 0.8468324746634245)
a1	330	SSRSPTPKQKKKKKK	0.846709	Q9UQ35	186	0	Q9UQ35_186(m3_s2 : 0.846708745063061)
a1	331	KPHTVPCKVTGRCGS	0.84669	P15880	183	0	P15880_183(m3_s2 : 0.8466903548466483)
a1	332	NFFKLNNKSEKDKKE	0.846661	P08183	22	0	P08183_22(m3_s2 : 0.8466613320379128)
a1	333	PKWDDFKKKKKELKQ	0.846581	Q15397	115	1	Q15397_115(m3_s2 : 0.846580666856301)
a1	334	HVRKEHGKQMKKHPC	0.846532	Q9HCE3	1050	1	Q9HCE3_1050(m3_s2 : 0.846532241296277)
a1	335	KSYTTPKKNKHKRKK	0.84649	P62979	90	1	P62979_90(m3_s2 : 0.8464903754693971)
a1	336	RFAKKHNKKGLKKMQ	0.846433	P47914	51	1	P47914_51(m3_s2 : 0.8464332701539763)
a1	337	NSKLRYKKKGSHCLE	0.84643	Q9UBC5	1032	0	Q9UBC5_1032(m3_s2 : 0.8464302270994098)
a1	338	WRRYRAKKYLCKVKA	0.846423	Q8IZT6	2950	0	Q8IZT6_2950(m3_s2 : 0.846422579745932)
a1	339	RVKPKKKKKKKKKTK	0.846386	Q9BVI0	545	1	Q9BVI0_545(m3_s2 : 0.8463859732308084)
a1	340	FVRFCFIKKDSTLDA	0.846378	Q6YP21	434	0	Q6YP21_434(m3_s2 : 0.8463783296565779)
a1	341	HPKNPNDKHRSKKCK	0.846271	Q9ULH7	276	1	Q9ULH7_276(m3_s2 : 0.8462713217899572)
a1	342	RLSKDAVKKKACTLA	0.846252	Q8N7X4	196	0	Q8N7X4_196(m3_s2 : 0.8462515105469295)
a1	343	ISDKCRKKNICHHCG	0.846172	O14802	153	0	O14802_153(m3_s2 : 0.846171549419205)
a1	344	FKHKNVNKRKEPKKK	0.846135	Q13601	253	1	Q13601_253(m3_s2 : 0.8461354605574984)
a1	345	VSGLRDVKMVKKAKT	0.846054	Q9BZE4	584	0	Q9BZE4_584(m3_s2 : 0.8460536401716025)
a1	346	EGKTFYSKKDRPLCK	0.846048	Q9NR12	443	0	Q9NR12_443(m3_s2 : 0.8460475903417174)
a1	347	LLINLSKKKVKKNPS	0.846019	Q6DN12	26	0	Q6DN12_26(m3_s2 : 0.8460194829776736)
a1	348	FKHYKPKKRFTSTKC	0.845986	Q96BJ3	250	0	Q96BJ3_250(m3_s2 : 0.8459856151707795)
a1	349	HGHKVQTKRLSCCLY	0.845979	Q9Y6X9	265	0	Q9Y6X9_265(m3_s2 : 0.8459794383202032)
a1	350	AKRKVKKKKRKKKTK	0.845967	Q6ZQX7	88	1	Q6ZQX7_88(m3_s2 : 0.8459667626238632)
a1	351	RDYVESQKKRSSCCS	0.845936	Q96AX2	214	0	Q96AX2_214(m3_s2 : 0.8459362263736493)
a1	352	SEPSCWGKKKKKKKR	0.845911	Q99569	788	1	Q99569_788(m3_s2 : 0.8459108662837529)
a1	353	ACKRLEKKRIKKRKG	0.845872	P34947	220	0	P34947_220(m3_s2 : 0.8458720798721898)
a1	354	HNSKVKHKKKHYKPS	0.845872	O60353	540	0	O60353_540(m3_s2 : 0.8458715216917998)
a1	355	CGHKVLAKEVKKPNL	0.845863	A1X283	605	0	A1X283_605(m3_s2 : 0.8458629474004251)
a1	356	VKEKLKGKKDKKHKA	0.845862	P30414	1000	0	P30414_1000(m3_s2 : 0.8458624392937895)
a1	357	MKTYIPPKGETKKKF	0.845855	P09429	82	0	P09429_82(m3_s2 : 0.8458545118841623)
a1	358	ANPKPTNKFFQCKFC	0.84582	Q96JM2	106	0	Q96JM2_106(m3_s2 : 0.8458197828015559)
a1	359	SLEGPEGKLKGPKFK	0.845777	Q09666	1177	0	Q09666_1177(m3_s2 : 0.8457765425602737)
a1	360	ILRKCIEKVAKAAFY	0.845752	Q9Y485	1624	0	Q9Y485_1624(m3_s2 : 0.8457518902525178)
a1	361	QVAKEKKKKKKKKKA	0.845647	P51532	582	1	P51532_582(m3_s2 : 0.8456468576889238)
a1	362	RRDFAVVKALAKLKA	0.845565	Q49MI3	378	0	Q49MI3_378(m3_s2 : 0.8455646329363263)
a1	363	HAAKQKQKKRKAQPQ	0.84553	Q13435	874	0	Q13435_874(m3_s2 : 0.8455299225939192)
a1	364	MTDFDRFKVMKAKKM	0.845469	P50914	111	0	P50914_111(m3_s2 : 0.8454692922887274)
a1	365	KKYLCKVKAACKIQA	0.845399	Q8IZT6	2956	0	Q8IZT6_2956(m3_s2 : 0.8453994318597351)
a1	366	AELEREAKKSAKKPQ	0.845362	Q7Z4V5	410	0	Q7Z4V5_410(m3_s2 : 0.8453615853238444)
a1	367	HQGTRPHKCQVCHKA	0.845273	Q8N895	310	0	Q8N895_310(m3_s2 : 0.845273102408575)
a1	368	KIKTEDTKKEKKRKL	0.845255	P11387	158	0	P11387_158(m3_s2 : 0.8452553080310918)
a1	369	KLKQTSRKKKKEKKK	0.845241	Q9H7Z3	81	1	Q9H7Z3_81(m3_s2 : 0.8452410654204667)
a1	370	PEMPLVKKKKKKKKG	0.845239	Q1ED39	66	1	Q1ED39_66(m3_s2 : 0.8452390195455768)
a1	371	EKLKEKVKREKKEKV	0.845163	Q9UIF9	773	1	Q9UIF9_773(m3_s2 : 0.8451626810303081)
a1	372	TGKGQGSKVIKKVKK	0.845121	Q8NCQ7	231	0	Q8NCQ7_231(m3_s2 : 0.8451205948978476)
a1	373	NLYIISVKGIKGRLN	0.844981	P62829	43	0	P62829_43(m3_s2 : 0.8449810142398502)
a1	374	EDDEPPAKGKKKKKK	0.844934	Q7Z4N2	583	1	Q7Z4N2_583(m3_s2 : 0.8449337146231247)
a1	375	EHPQRSKKAVWHKLL	0.844914	Q92736	3584	0	Q92736_3584(m3_s2 : 0.8449138486578502)
a1	376	FFLKHNSKVKHKKKH	0.8449	O60353	536	1	O60353_536(m3_s2 : 0.8448999118915075)
a1	377	LVLSKPSKGQKRHLS	0.844875	O15226	28	0	O15226_28(m3_s2 : 0.8448747213103325)
a1	378	RYEECKEKLVPFLKK	0.844844	Q8IYD1	369	0	Q8IYD1_369(m3_s2 : 0.8448439601582645)
a1	379	FHKSRRKKKRKKLCQ	0.844839	Q7Z570	597	1	Q7Z570_597(m3_s2 : 0.8448385305210789)
a1	380	NNPHLQKKRCSKKGL	0.844754	Q5T848	743	0	Q5T848_743(m3_s2 : 0.8447539479206434)
a1	381	EYSTEKHKKHKKEKK	0.844714	Q15648	1498	0	Q15648_1498(m3_s2 : 0.8447137898407532)
a1	382	RKNFLQVKKAATCLQ	0.844713	Q8IZT6	1802	0	Q8IZT6_1802(m3_s2 : 0.8447131727863977)
a1	383	LKAKKPKKGKPHCSR	0.844713	Q02878	39	0	Q02878_39(m3_s2 : 0.8447125124914892)
a1	384	PGPGRAVKCGKGLAA	0.844673	P35030	20	0	P35030_20(m3_s2 : 0.8446734786650852)
a1	385	SLGKDWHKFCLKCER	0.844662	P52943	27	0	P52943_27(m3_s2 : 0.8446623307365687)
a1	386	AQDKYIKKKKKKYEA	0.844662	Q9UJA5	149	0	Q9UJA5_149(m3_s2 : 0.8446620702958154)
a1	387	GEKPYECKQCGKALS	0.844616	Q9H7R0	380	0	Q9H7R0_380(m3_s2 : 0.844616295631199)
a1	387	GEKPYECKQCGKALS	0.84181	Q9Y2A4	396	0	Q9H7R0_380(m3_s2 : 0.844616295631199)
a1	388	LNASKEKKKKKYSGA	0.844603	Q9NPG3	235	0	Q9NPG3_235(m3_s2 : 0.844603383249158)
a1	389	TTNRSEQKSRKFLKS	0.844577	Q9NWS6	14	0	Q9NWS6_14(m3_s2 : 0.8445769595047298)
a1	390	NSHKSEKKKKRYKDS	0.844572	Q6ZU65	314	0	Q6ZU65_314(m3_s2 : 0.8445717152434059)
a1	391	SGDYNMAKAKMKNKQ	0.844569	O43768	74	0	O43768_74(m3_s2 : 0.8445694589958206)
a1	392	PKDKDSKKTKTCSKL	0.844557	Q3L8U1	581	0	Q3L8U1_581(m3_s2 : 0.8445567373166989)
a1	393	TPKKSIKKTPKKVKK	0.844552	P16402	154	1	P16402_154(m3_s2 : 0.8445522324457663)
a1	394	PYLLTTKKKWKDCKI	0.844496	P55011	1047	0	P55011_1047(m3_s2 : 0.8444963373404746)
a1	395	RKHQQRQKYKKMKKA	0.844465	Q8IZT6	1601	1	Q8IZT6_1601(m3_s2 : 0.8444653211282509)
a1	396	SFLKEKNKKLKKKNK	0.844461	Q96QE3	476	1	Q96QE3_476(m3_s2 : 0.8444607575394879)
a1	397	LKRRFEIKKKLKTAK	0.844302	Q92541	225	1	Q92541_225(m3_s2 : 0.8443016011838849)
a1	398	FQPSKSHKKVLKKML	0.844239	O95260	91	0	O95260_91(m3_s2 : 0.8442388116087691)
a1	399	TNNPHLQKKRCSKKG	0.84419	Q5T848	742	0	Q5T848_742(m3_s2 : 0.8441898233002607)
a1	400	ARKEKKIKSKKYHKV	0.844173	Q5TAP6	247	1	Q5TAP6_247(m3_s2 : 0.8441728573692907)
a1	401	FRLNDSHKHKDKHKD	0.844171	P11387	23	1	P11387_23(m3_s2 : 0.8441707581442465)
a1	402	KAVKRFLKQECKCHG	0.844169	P09544	203	0	P09544_203(m3_s2 : 0.8441691406813128)
a1	403	HKKRRKEKKVKHKKK	0.844139	P30414	434	1	P30414_434(m3_s2 : 0.8441390480813518)
a1	404	EAIKQLRKLQAQMKD	0.844073	P35749	1649	0	P35749_1649(m3_s2 : 0.8440733895789189)
a1	405	RPHFPALKKKKRGME	0.844066	Q96BT1	205	0	Q96BT1_205(m3_s2 : 0.8440662080689503)
a1	406	SVSVTMIKRKAAHKK	0.844041	Q5JUX0	29	0	Q5JUX0_29(m3_s2 : 0.8440406437308722)
a1	407	VIEEPALKRKKKKKR	0.84403	Q1ED39	287	1	Q1ED39_287(m3_s2 : 0.8440300809437005)
a1	408	DTKGDYQKALLYLCG	0.844012	P07355	329	0	P07355_329(m3_s2 : 0.8440122283070621)
a1	409	LGPTHKKKSKKKKKK	0.84399	Q15361	274	1	Q15361_274(m3_s2 : 0.843989624726917)
a1	410	FLKEKNKKLKKKNKK	0.843976	Q96QE3	477	1	Q96QE3_477(m3_s2 : 0.8439758234907078)
a1	411	RGYVCAIKVEKFCCA	0.843974	Q08AF3	297	0	Q08AF3_297(m3_s2 : 0.8439744611226071)
a1	412	HESRKHKKSKKSHKK	0.843965	Q6ZUT1	152	1	Q6ZUT1_152(m3_s2 : 0.8439654917835743)
a1	413	KKLEDGPKFLKSGDA	0.843959	P68104	392	0	P68104_392(m3_s2 : 0.8439586080963656)
a1	414	CRLEIQKKQTPHRTC	0.843958	Q68DK7	605	0	Q68DK7_605(m3_s2 : 0.8439575631475056)
a1	415	EASEETGKRVSKFKA	0.843956	O94763	521	0	O94763_521(m3_s2 : 0.843955891482935)
a1	416	AIKKKKKKKEKKDKK	0.843931	Q9UPV0	115	1	Q9UPV0_115(m3_s2 : 0.8439313104793721)
a1	417	HQVKKSVKWTCKACG	0.843911	Q6NTE8	28	0	Q6NTE8_28(m3_s2 : 0.8439112356128827)
a1	418	EHPDLDQKGKKSDIC	0.843869	P0CB48	184	0	P0CB48_184(m3_s2 : 0.8438687426539393)
a1	419	FREISYLKKLKVKKQ	0.843857	P09874	346	0	P09874_346(m3_s2 : 0.8438571575455053)
a1	420	PKEGKRGKQKKKERC	0.843806	Q8N3Z6	517	0	Q8N3Z6_517(m3_s2 : 0.8438057432814448)
a1	421	SKKEERLKKHIKKLQ	0.843741	Q03468	329	1	Q03468_329(m3_s2 : 0.8437406477032087)
a1	422	RKQAQIRKVYPGLSC	0.843737	Q92831	683	0	Q92831_683(m3_s2 : 0.8437368352932033)
a1	423	ECDTLSRKKSARFKS	0.843643	Q5T5U3	1706	0	Q5T5U3_1706(m3_s2 : 0.8436425985285719)
a1	424	FVPEKVEKVSKACKS	0.843635	Q9C0G6	2873	0	Q9C0G6_2873(m3_s2 : 0.8436349955220567)
a1	425	YLKDRMAKVCDGCFG	0.843614	Q6ZNL6	1291	0	Q6ZNL6_1291(m3_s2 : 0.8436138287733467)
a1	426	HRHKKKKKHKKSSKH	0.843607	Q9UKJ3	680	1	Q9UKJ3_680(m3_s2 : 0.8436070529798038)
a1	427	FSKTLGIKLKKNMGG	0.843564	Q8TE49	527	0	Q8TE49_527(m3_s2 : 0.8435638733043658)
a1	428	KQQKEKNKVKKKRKK	0.843505	Q6UB99	453	1	Q6UB99_453(m3_s2 : 0.8435045228557256)
a1	429	KSQKHKHKKKKSKKN	0.843445	Q7Z6E9	1766	1	Q7Z6E9_1766(m3_s2 : 0.8434445109980059)
a1	430	PTGKSKKKKKKKKKQ	0.843411	Q86UE4	445	1	Q86UE4_445(m3_s2 : 0.8434112286468433)
a1	431	SPSDKVVKKGKKDKK	0.843396	Q8NE71	29	1	Q8NE71_29(m3_s2 : 0.8433962426687529)
a1	432	QSQITRRKKRKKDFQ	0.843378	Q15361	53	1	Q15361_53(m3_s2 : 0.8433782062231261)
a1	433	ENKNDPEKKKKKKDK	0.843363	P29973	128	1	P29973_128(m3_s2 : 0.843362852497812)
a1	434	EKEKKPRKKVPKQLG	0.843361	Q6ZU65	295	0	Q6ZU65_295(m3_s2 : 0.8433605597871014)
a1	435	LYHQPDDKKKNRGFC	0.843332	O60506	282	0	O60506_282(m3_s2 : 0.8433322474233954)
a1	435	LYHQPDDKKKNRGFC	0.841166	O43390	285	0	O60506_282(m3_s2 : 0.8433322474233954)
a1	436	GFCRYLEKQFSDLKQ	0.843197	Q96G03	91	0	Q96G03_91(m3_s2 : 0.8431974549607122)
a1	437	EYHRLQSKVTAKAAA	0.843041	P00966	408	0	P00966_408(m3_s2 : 0.8430409584877671)
a1	438	EKDWNNHKKGKDCSK	0.842978	P05305	143	0	P05305_143(m3_s2 : 0.8429782527927336)
a1	439	AMKADASKKLLKKKK	0.842968	Q02880	1255	1	Q02880_1255(m3_s2 : 0.8429682549957017)
a1	440	YKIGASRKTFWKRKK	0.842952	Q6AHZ1	325	0	Q6AHZ1_325(m3_s2 : 0.8429516954266871)
a1	441	AGAGKVTKSAQKAQK	0.842948	P68104	453	0	P68104_453(m3_s2 : 0.8429484454705714)
a1	442	RVTDVELKRLKDAFK	0.842936	Q8NFA0	26	0	Q8NFA0_26(m3_s2 : 0.8429360582552587)
a1	443	PTPKQKKKKKKKDRG	0.842929	Q9UQ35	190	1	Q9UQ35_190(m3_s2 : 0.8429290936064122)
a1	444	AIAEYIVKKAKQRIA	0.842924	Q9H5I1	129	0	Q9H5I1_129(m3_s2 : 0.8429238556883746)
a1	445	TKKKVSQKKQRGRPS	0.84289	Q9BPZ2	35	0	Q9BPZ2_35(m3_s2 : 0.8428899422003298)
a1	446	IIKYDPSKYCHNLKK	0.842886	Q76FK4	170	0	Q76FK4_170(m3_s2 : 0.8428864157729016)
a1	447	NGHEERSKKRKKSKS	0.842836	Q14498	33	0	Q14498_33(m3_s2 : 0.8428357572840794)
a1	448	KKLEKAMKVLKKQKK	0.842828	Q9NVU7	268	1	Q9NVU7_268(m3_s2 : 0.8428275515587809)
a1	449	KVLKFACKVQKKDPK	0.842807	Q9UNF1	462	0	Q9UNF1_462(m3_s2 : 0.842807369245356)
a1	450	PPKFLPHKYDVKLQN	0.842763	Q9UIG0	221	0	Q9UIG0_221(m3_s2 : 0.8427630348515052)
a1	451	FTPAMQRKKLKDFSG	0.842599	Q9UG63	224	0	Q9UG63_224(m3_s2 : 0.8425994245946888)
a1	452	QHKRKIIKYDPSKYC	0.842593	Q76FK4	165	1	Q76FK4_165(m3_s2 : 0.8425927645710006)
a1	453	QRVTRSVKRCAENPK	0.842585	P46013	3227	0	P46013_3227(m3_s2 : 0.8425850349303964)
a1	454	SSKRDKSKKKKKVKV	0.842561	Q08945	628	1	Q08945_628(m3_s2 : 0.8425607971173469)
a1	455	LKRDLKIKKEKDLMQ	0.842555	Q12830	2778	0	Q12830_2778(m3_s2 : 0.8425553428384492)
a1	456	DSTTPEIKKDEKKKK	0.842425	Q9Y4C8	112	0	Q9Y4C8_112(m3_s2 : 0.8424249408981013)
a1	457	LLGPTHKKKSKKKKK	0.842369	Q15361	273	1	Q15361_273(m3_s2 : 0.8423689307146892)
a1	458	NISFNDKKFVIKPID	0.842353	P15311	254	0	P15311_254(m3_s2 : 0.8423530981516074)
a1	459	HRSESESKKRKHRSP	0.842344	Q9UQ35	225	0	Q9UQ35_225(m3_s2 : 0.8423444596325044)
a1	460	CTKRALPKKSQVLKS	0.842308	Q69YH5	554	0	Q69YH5_554(m3_s2 : 0.8423079989335371)
a1	461	PYCTHVVKRKADLKR	0.842256	Q96BR9	292	0	Q96BR9_292(m3_s2 : 0.8422560715895141)
a1	462	VTATLEEKRKEKAKI	0.842245	P40429	159	0	P40429_159(m3_s2 : 0.8422446320738347)
a1	463	EWNVERNKVKALHCC	0.842245	Q9GZL7	178	0	Q9GZL7_178(m3_s2 : 0.8422445950228898)
a1	464	DIEGPEGKLKGPKFK	0.842237	Q09666	4501	0	Q09666_4501(m3_s2 : 0.8422370190207383)
a1	465	LKHTKSIKKTISLLS	0.842223	Q8IZT6	1080	0	Q8IZT6_1080(m3_s2 : 0.8422231500961592)
a1	466	DKYKYSRKGSQKKTL	0.842215	Q99590	1445	0	Q99590_1445(m3_s2 : 0.8422147276187324)
a1	467	KELAAEKKRILHCLG	0.842205	P53004	276	0	P53004_276(m3_s2 : 0.8422045042224844)
a1	468	YSYGRGPKVKGKLKC	0.842201	Q12986	183	0	Q12986_183(m3_s2 : 0.842201188965099)
a1	469	GAKLCVVKTQRKAKQ	0.842172	Q9NW82	514	0	Q9NW82_514(m3_s2 : 0.8421717803116656)
a1	470	AKVAKSNKCTAKDKL	0.842109	Q9NWS1	559	0	Q9NWS1_559(m3_s2 : 0.8421088668535338)
a1	471	PYDKCKDKYGKPNKR	0.842101	Q7Z4V5	67	0	Q7Z4V5_67(m3_s2 : 0.8421006063325689)
a1	472	PSKSPSKKKKKFRTP	0.841998	Q9UEY8	685	0	Q9UEY8_685(m3_s2 : 0.8419983561000607)
a1	473	DRKECEVKKEKLSSV	0.841964	Q14151	501	0	Q14151_501(m3_s2 : 0.841964279482972)
a1	474	RNISFNDKKFVIKPI	0.841942	P15311	253	0	P15311_253(m3_s2 : 0.841941810096419)
a1	475	SESPSQKKKKKKKKT	0.841933	Q13428	1476	1	Q13428_1476(m3_s2 : 0.8419332174322021)
a1	476	RPPDHIPKKTKKHLE	0.841905	P55196	353	0	P55196_353(m3_s2 : 0.8419045888277127)
a1	477	HKVSPSLKGFLDRLL	0.841867	O96013	546	0	O96013_546(m3_s2 : 0.8418674402643157)
a1	478	FGLDKELKKLKKAVA	0.841859	Q7Z7A1	977	0	Q7Z7A1_977(m3_s2 : 0.8418594130969486)
a1	479	LKDKKEKKAKRKKKD	0.841859	Q8TDI0	110	0	Q8TDI0_110(m3_s2 : 0.8418594066042211)
a1	480	WNKILSYKIGKEMQN	0.841777	P52907	278	0	P52907_278(m3_s2 : 0.8417769005746855)
a1	481	LVYKDGSKQKKKLVG	0.841776	Q13009	1309	0	Q13009_1309(m3_s2 : 0.841776050199266)
a1	482	QGQDVSNKVKASRKL	0.841701	P55196	1807	0	P55196_1807(m3_s2 : 0.8417011278525917)
a1	483	LPRLCIRKFFPKKKC	0.841686	P32455	228	1	P32455_228(m3_s2 : 0.8416864560092747)
a1	484	SNKTTLQKMGKKQNG	0.841656	Q13185	10	0	Q13185_10(m3_s2 : 0.8416564157907818)
a1	485	FIKEKKKKSPKKRKL	0.841593	Q9NPG3	186	1	Q9NPG3_186(m3_s2 : 0.8415927273852061)
a1	486	SDYSPNKKKKKKLKD	0.841523	Q8TDI0	98	0	Q8TDI0_98(m3_s2 : 0.8415234758746247)
a1	487	YRVWIQCKYCKPLLS	0.841505	Q6P1Q9	368	0	Q6P1Q9_368(m3_s2 : 0.8415049039844562)
a1	488	GTTKNDFKKLRKRKC	0.841453	Q96QE3	203	1	Q96QE3_203(m3_s2 : 0.8414534821225301)
a1	489	SKKPSGKKTCTFCKK	0.841332	Q14202	351	0	Q14202_351(m3_s2 : 0.8413319412793767)
a1	490	KKSKKSHKKKQKKRS	0.84132	Q6ZUT1	158	1	Q6ZUT1_158(m3_s2 : 0.8413197963430353)
a1	491	HFKKKRIKTTQKTKK	0.841274	Q03701	1044	0	Q03701_1044(m3_s2 : 0.8412738382096192)
a1	492	LNYGLYRKMEIYRPH	0.841259	Q13547	50	0	Q13547_50(m3_s2 : 0.8412586951267865)
a1	493	HKRKEPNKSIKHCTV	0.84121	Q9NXF1	416	0	Q9NXF1_416(m3_s2 : 0.841209793735974)
a1	494	RKKLILAKKFSKDLG	0.84121	P86452	83	0	P86452_83(m3_s2 : 0.8412095166504483)
a1	495	LRAFYGIKVKGVRGQ	0.841174	Q6P4F7	22	0	Q6P4F7_22(m3_s2 : 0.8411735391471202)
a1	496	ELMNPSQKKKRKHRL	0.841172	Q92800	492	1	Q92800_492(m3_s2 : 0.8411723686572128)
a1	497	DELEDYIKVQKARGL	0.84112	Q9NPI7	20	0	Q9NPI7_20(m3_s2 : 0.8411204851174058)
a1	498	NKPTMEHKRNICKIN	0.841088	Q8NI77	874	0	Q8NI77_874(m3_s2 : 0.841088232809021)
a1	499	SRNKYPLKYLKDRMA	0.841058	Q6ZNL6	1283	0	Q6ZNL6_1283(m3_s2 : 0.8410583812642377)
a1	500	CEQTEEKKKLKRHLA	0.841055	Q96P65	408	0	Q96P65_408(m3_s2 : 0.8410551973886856)
a1	501	TSTSNELKKKSECLQ	0.841031	Q9P2Y5	234	0	Q9P2Y5_234(m3_s2 : 0.8410312218954316)
a1	502	FLAHESLKKPKHKRK	0.841016	Q9Y6X0	934	0	Q9Y6X0_934(m3_s2 : 0.8410160926956578)
a1	503	DKEEMDEKAKLKKKA	0.841014	Q8NCQ7	252	1	Q8NCQ7_252(m3_s2 : 0.8410140863219735)
a1	504	FLKKLLGKKLTRCLK	0.840945	O43868	129	0	O43868_129(m3_s2 : 0.8409449458565791)
a1	505	TKEDTSPKKKKKKLR	0.840896	Q99549	151	0	Q99549_151(m3_s2 : 0.8408957490914094)
a1	506	HYMKHQKKGVHRCPK	0.840833	Q8ND82	467	0	Q8ND82_467(m3_s2 : 0.8408327741936846)
a1	507	RPKQKKKKKKKKKSK	0.840793	A8MW92	572	1	A8MW92_572(m3_s2 : 0.8407930797260836)
a1	508	NAWGIQKKQNAKRFK	0.840772	Q9UMY1	238	0	Q9UMY1_238(m3_s2 : 0.8407723602879705)
a1	509	KAMKVLKKQKKKKKP	0.840764	Q9NVU7	272	0	Q9NVU7_272(m3_s2 : 0.8407644213924638)
a1	510	AKAKSRIKMKKARKI	0.84076	P55201	493	0	P55201_493(m3_s2 : 0.8407595937104173)
a1	511	CQICRPRKKGRKLLQ	0.840742	Q92794	314	0	Q92794_314(m3_s2 : 0.8407416990819482)
a1	512	APEMPLVKKKKKKKK	0.840691	Q1ED39	65	1	Q1ED39_65(m3_s2 : 0.8406907703441211)
a1	513	NASIISLKSDKKRKL	0.84069	Q9H0A0	989	1	Q9H0A0_989(m3_s2 : 0.8406898638543003)
a1	514	EEAAEYAKLLAKRMK	0.840674	P62753	211	0	P62753_211(m3_s2 : 0.840674467007385)
a1	515	THKKKSKKKKKKKSN	0.840643	Q15361	277	1	Q15361_277(m3_s2 : 0.8406434971426118)
a1	516	KRVASLLKKAKAQLC	0.840624	Q03164	1028	0	Q03164_1028(m3_s2 : 0.8406237054540141)
a1	517	FEDEEKSKMLARLLK	0.840598	Q9UJY5	176	0	Q9UJY5_176(m3_s2 : 0.840598138414007)
a1	518	LVDKLQLKVKAYKRQ	0.840499	P12883	1874	0	P12883_1874(m3_s2 : 0.8404993068557953)
a1	519	LLRKQAWKQKWRKKG	0.840424	O94761	380	0	O94761_380(m3_s2 : 0.840424149310166)
a1	520	RKKKKFQKSRSKHKK	0.840374	Q86X95	247	1	Q86X95_247(m3_s2 : 0.8403743146133005)
a1	521	HLKMPKVKMPKFSMP	0.84036	Q09666	2642	0	Q09666_2642(m3_s2 : 0.8403604465729874)

## Sheet: Table 8
Supplementary Table 8. Experimentally validated sites predicted to be negative for mono-methylation by the SET8 ML-hybrid ensemble model found within the surface exposed human proteome, isolated for the bottom 362 negative scoring sites. Annotated to include ML score, and SET8 methylation score as determined in vitro with peptide arrays.
Array	Spot #	Peptide	ML Score	Uniprot ID	K Pos	Methylated by SET8 (0=no, 1=yes)	Annotation
a7	237	PEQRSHKKGAGAKKD	0.252626	Q92522	174	0	Q92522_174(m3_s2 : 0.2526257225288099)
a7	238	AGGKKVKKAAKPSVP	0.263624	Q92522	199	0	Q92522_199(m3_s2 : 0.2636244206953489)
a7	239	SGRGKGGKGLGKGGA	0.265273	P62805	9	0	P62805_9(m3_s2 : 0.2652732056960545)
a7	240	PIRRAKTKEGKGPGH	0.242727	Q12873	261	0	Q12873_261(m3_s2 : 0.2427269237977645)
a7	241	GAGAKKDKGGKAKKT	0.257354	Q92522	182	0	Q92522_182(m3_s2 : 0.2573539124145031)
a7	242	EAKGKGPKKPSEAKE	0.25976	Q8IZA3	158	0	Q8IZA3_158(m3_s2 : 0.2597599163565313)
a7	243	KKVKKAAKPSVPKVP	0.265871	Q92522	202	0	Q92522_202(m3_s2 : 0.2658705871433555)
a7	244	APTAHKAKKAAPGAA	0.236006	Q92522	145	0	Q92522_145(m3_s2 : 0.2360056430811574)
a7	245	GGKKKGSKWNTRESY	0.228085	Q99848	258	0	Q99848_258(m3_s2 : 0.2280851542558718)
a7	246	IMEVAHGKDHPYISE	0.227976	Q9NRG4	418	0	Q9NRG4_418(m3_s2 : 0.2279762494938512)
a7	247	RGHYTVGKESIDLVL	0.240249	Q9NY65	112	0	Q9NY65_112(m3_s2 : 0.2402491792963839)
a7	248	GMAKKVTKAGGSAAL	0.225922	Q92522	23	0	Q92522_23(m3_s2 : 0.2259224457676536)
a7	249	EQIAAEQKANPDGKK	0.269646	Q9UKM9	216	0	Q9UKM9_216(m3_s2 : 0.269645655475469)
a7	250	RDYEKAMKEYEGGRG	0.226095	Q08945	612	0	Q08945_612(m3_s2 : 0.2260947339665516)
a7	251	GAAGAPGKGSEKGPP	0.229506	O00257	223	0	O00257_223(m3_s2 : 0.2295063450923917)
a7	252	GKNSSGWKEEEVLQS	0.228317	P78545	362	0	P78545_362(m3_s2 : 0.2283173430859243)
a7	253	GGRMLKHKRQRDDGE	0.228767	P03372	268	0	P03372_268(m3_s2 : 0.2287666668735074)
a7	254	KAKLKREKADALEAK	0.22312	Q9NRL2	331	0	Q9NRL2_331(m3_s2 : 0.2231195944902949)
a7	255	KKGAGAKKDKGGKAK	0.264889	Q92522	180	0	Q92522_180(m3_s2 : 0.2648889845119868)
a7	256	EKAKHYHKEYRQMYR	0.232803	P18124	59	0	P18124_59(m3_s2 : 0.2328026463241659)
a7	257	YADMLHDKDRNVKYY	0.222384	Q9NVM4	42	0	Q9NVM4_42(m3_s2 : 0.2223839305845711)
a7	258	KRIFVEAKLRPSADE	0.24119	Q9Y2U5	602	0	Q9Y2U5_602(m3_s2 : 0.2411904742681819)
a7	259	WAQGAGAKGYLGAVK	0.223043	O00257	205	0	O00257_205(m3_s2 : 0.2230426279460649)
a7	260	YTEHAKRKTVTAMDV	0.211712	P62805	80	0	P62805_80(m3_s2 : 0.2117121810857127)
a7	261	SKTKKVTKNEEPSEE	0.209738	Q9NR30	116	0	Q9NR30_116(m3_s2 : 0.2097377899132769)
a7	262	GPAEGPGKKAPAERG	0.231476	Q92833	472	0	Q92833_472(m3_s2 : 0.2314757594017618)
a7	263	VGLHAASKDPREVRE	0.215209	Q9H9B1	219	0	Q9H9B1_219(m3_s2 : 0.2152087203017862)
a7	264	PRRAGEAKGKGPKKP	0.26349	Q8IZA3	153	0	Q8IZA3_153(m3_s2 : 0.2634895533429542)
a7	265	KKQNTVSKGPFSKVR	0.212878	Q92794	350	0	Q92794_350(m3_s2 : 0.2128776762170393)
a7	266	QSPPKKMKGAAGPAE	0.207767	Q92833	461	0	Q92833_461(m3_s2 : 0.2077674351409501)
a7	267	KRRYKNQKFGFGGKK	0.21622	Q99848	247	0	Q99848_247(m3_s2 : 0.2162204650619454)
a7	268	PVEVKKGKDPNAPKR	0.211909	Q08945	542	0	Q08945_542(m3_s2 : 0.2119094707726585)
a7	269	KELPTSQKGDDGPDI	0.210088	O14686	1822	0	O14686_1822(m3_s2 : 0.2100881099479614)
a7	270	GMQAVKIKSGEVAEG	0.210747	O00257	280	0	O00257_280(m3_s2 : 0.2107467083239131)
a7	271	TGVLKQTKGVGASGS	0.211746	P07305	85	0	P07305_85(m3_s2 : 0.2117463155045555)
a7	272	DLGAPASKLPPPLSA	0.225957	Q14781	199	0	Q14781_199(m3_s2 : 0.2259569874007367)
a7	273	AKRLLVGKSASVDAE	0.213617	Q13620	619	0	Q13620_619(m3_s2 : 0.2136167384249849)
a7	274	PPGSKIPKAPSGGAV	0.206347	Q14781	310	0	Q14781_310(m3_s2 : 0.2063465190495425)
a7	275	RLVYKFGKNSSGWKE	0.208911	P78545	356	0	P78545_356(m3_s2 : 0.2089111512504017)
a7	276	PGLLSLAKPLDAPAV	0.209091	O95785	955	0	O95785_955(m3_s2 : 0.2090912179221492)
a7	277	LKEKTGPKIGGETLL	0.210193	Q7L590	854	0	Q7L590_854(m3_s2 : 0.2101933696723781)
a7	278	AKSHPPDKWAQGAGA	0.215771	O00257	197	0	O00257_197(m3_s2 : 0.2157711791556856)
a7	279	YQKGFSDKLDFLEGD	0.208647	Q99848	209	0	Q99848_209(m3_s2 : 0.2086470722052575)
a7	280	ARRREREKASAAKSS	0.240001	Q12834	485	0	Q12834_485(m3_s2 : 0.2400007905731908)
a7	281	GKDPNAPKRPMSAYM	0.24041	Q08945	548	0	Q08945_548(m3_s2 : 0.2404103204529742)
a7	282	FYVPAEPKLAFVIRI	0.220211	P18124	88	0	P18124_88(m3_s2 : 0.2202109911766963)
a7	283	VIPKGTFKPPCEDEI	0.209098	Q8NEZ4	4372	0	Q8NEZ4_4372(m3_s2 : 0.2090984284849274)
a7	284	KEKPKSDKTEEIAEE	0.20116	Q9NR30	40	0	Q9NR30_40(m3_s2 : 0.2011601383516072)
a7	285	RAKTKEGKGPGHKRR	0.26255	Q12873	264	0	Q12873_264(m3_s2 : 0.2625497135840644)
a7	286	RMARMARKAGNFYVP	0.227504	P18124	77	0	P18124_77(m3_s2 : 0.2275040724787789)
a7	287	RDYMERDKENPNQYN	0.204516	Q13620	903	0	Q13620_903(m3_s2 : 0.2045161082153805)
a7	288	CPSCRLRKCYEAGMT	0.205997	P10275	619	0	P10275_619(m3_s2 : 0.205996737705263)
a7	289	RDEGGGRKRPVPDPD	0.201621	Q9P0U4	110	0	Q9P0U4_110(m3_s2 : 0.2016214075112866)
a7	290	LQKRQQEKAHMMNAI	0.213172	Q99848	192	0	Q99848_192(m3_s2 : 0.2131719950659545)
a7	291	KKQKLEGKAGHGPGP	0.215203	O75528	109	0	O75528_109(m3_s2 : 0.2152033041536793)
a7	292	AEEKKDEKKEESEES	0.200526	P05387	98	0	P05387_98(m3_s2 : 0.2005257647585402)
a7	293	PDRYQLWKQGKDIYT	0.202236	Q9H3R0	335	0	Q9H3R0_335(m3_s2 : 0.2022364386307322)
a7	294	AAKGKRTKKGMATAK	0.233402	O75151	1072	0	O75151_1072(m3_s2 : 0.2334024296891539)
a7	295	AFRSWTKKQALAEHE	0.201319	O75151	412	0	O75151_412(m3_s2 : 0.2013194630019346)
a7	296	VQEYPTLKVPYETLN	0.199317	Q7L5Y9	23	0	Q7L5Y9_23(m3_s2 : 0.1993167152516856)
a7	297	TGSLSSAKRKEPEPK	0.235956	P39748	354	0	P39748_354(m3_s2 : 0.2359564926480757)
a7	298	VSGAKGSKINISQVI	0.201798	P24928	778	0	P24928_778(m3_s2 : 0.2017981089924935)
a7	299	KKQGEVSKAASADST	0.206246	O75367	167	0	O75367_167(m3_s2 : 0.2062460296940245)
a7	300	RGHYTIGKEIIDPVL	0.248792	P68366	112	0	P68366_112(m3_s2 : 0.2487922159845987)
a7	301	RGSGFPGKRRPRGAG	0.231032	Q8NEZ4	893	0	Q8NEZ4_893(m3_s2 : 0.2310324256227166)
a7	302	VKSAPVPKKGSKKAI	0.266638	Q99879	12	0	Q99879_12(m3_s2 : 0.2666383814340093)
a7	303	LTTLDVTKLTPLSHE	0.203334	P41091	27	0	P41091_27(m3_s2 : 0.2033336810610971)
a7	304	PVQKHKSKEATPAKE	0.241501	Q92833	244	0	Q92833_244(m3_s2 : 0.2415005799992979)
a7	305	GCEVDDLKGGVAGGS	0.199447	P41091	275	0	P41091_275(m3_s2 : 0.1994470139857448)
a7	306	YQLWKQGKDIYTIDH	0.198621	Q9H3R0	338	0	Q9H3R0_338(m3_s2 : 0.1986207600273356)
a7	307	SRSLRRTKLNQESTA	0.198101	Q14676	1885	0	Q14676_1885(m3_s2 : 0.1981014116915237)
a7	308	DGRVVEPKRAVAREE	0.20974	P22626	94	0	P22626_94(m3_s2 : 0.209740347857712)
a7	309	AERVEKEKAQAVEQQ	0.203991	Q12830	2034	0	Q12830_2034(m3_s2 : 0.2039906978877424)
a7	310	KDKEKVSKEEEEKER	0.195736	P23921	765	0	P23921_765(m3_s2 : 0.1957359802722357)
a7	311	KSKNLQPKIQEYEFT	0.19628	O75528	129	0	O75528_129(m3_s2 : 0.196279687462203)
a7	312	PPEPKTTKLGQRRES	0.208328	O60885	317	0	O60885_317(m3_s2 : 0.2083284916288734)
a7	313	GKLKDKSKPDLESSL	0.238623	Q99549	183	0	Q99549_183(m3_s2 : 0.2386225159476694)
a7	314	EAVTPLTKAADISLD	0.214272	Q12888	1613	0	Q12888_1613(m3_s2 : 0.2142721484882025)
a7	315	PSLPKKLKPEQIRVE	0.202555	O95785	1177	0	O95785_1177(m3_s2 : 0.2025545911021455)
a7	316	PAEGPGKKAPAERGL	0.222666	Q92833	473	0	Q92833_473(m3_s2 : 0.2226659733085434)
a7	317	GKIQKLTKAVATYHA	0.200056	P51532	502	0	P51532_502(m3_s2 : 0.2000558540637629)
a7	318	GTSDHFTKPSPRADV	0.198488	Q8NEZ4	2009	0	Q8NEZ4_2009(m3_s2 : 0.1984879825083195)
a7	319	VVKYWPEKGKSGFLV	0.21655	Q96T88	568	0	Q96T88_568(m3_s2 : 0.2165499860259208)
a7	320	EEYKIWKKNTPFLYD	0.207136	Q16576	25	0	Q16576_25(m3_s2 : 0.2071355252100189)
a7	321	TQIQHIHKLGRRWGP	0.201242	Q92833	616	0	Q92833_616(m3_s2 : 0.2012417743335923)
a7	322	SAPPTETKSLRIASR	0.196146	Q9NRL2	1327	0	Q9NRL2_1327(m3_s2 : 0.1961457523717298)
a7	323	VKKPESKKEQTPEHG	0.216915	O76021	337	0	O76021_337(m3_s2 : 0.2169150956090955)
a7	324	WHCGSCMKTVAGGAW	0.194559	P61513	62	0	P61513_62(m3_s2 : 0.1945589778338137)
a7	325	QGGKARAKAKSRSSR	0.28336	Q16777	14	0	Q16777_14(m3_s2 : 0.2833598045050632)
a7	326	QIIAGVEKKIAQDTV	0.205701	A8MW92	824	0	A8MW92_824(m3_s2 : 0.2057012242640084)
a7	327	KTELTQIKSNIDALL	0.24399	Q9UKM9	198	0	Q9UKM9_198(m3_s2 : 0.2439901347147626)
a7	328	AKKNKAMKSIKVKEE	0.223957	O14646	1343	0	O14646_1343(m3_s2 : 0.2239569126588241)
a7	329	AVPPPLAKAIGLEIK	0.21192	P26358	1586	0	P26358_1586(m3_s2 : 0.2119198919972036)
a7	330	ESKPKKKKEESEKPR	0.204645	P83916	104	0	P83916_104(m3_s2 : 0.2046452027451909)
a7	331	EITSLRMKLHQQERD	0.195445	Q15058	754	0	Q15058_754(m3_s2 : 0.1954445885935365)
a7	332	VAAIQAEKNRAGSSR	0.194327	P07305	40	0	P07305_40(m3_s2 : 0.1943273836738699)
a7	333	KEMTHLQKEVTAIET	0.193816	Q14683	910	0	Q14683_910(m3_s2 : 0.1938159153982914)
a7	334	VGVDGAEKKEDYNET	0.19583	A8MW92	297	0	A8MW92_297(m3_s2 : 0.195829942131966)
a7	335	KTASVLSKDDVAPES	0.229743	O76021	318	0	O76021_318(m3_s2 : 0.22974338980926)
a7	336	ENGMQAVKIKSGEVA	0.213099	O00257	278	0	O00257_278(m3_s2 : 0.2130985682681744)
a7	337	ETFSDLWKLLPENNV	0.219459	P04637	24	0	P04637_24(m3_s2 : 0.219458936448481)
a7	338	PPKRKKRKDINTIED	0.191832	Q96EB6	238	0	Q96EB6_238(m3_s2 : 0.1918316687487304)
a7	339	KPQSPPKKMKGAAGP	0.225481	Q92833	459	0	Q92833_459(m3_s2 : 0.2254808922746371)
a7	340	DRDPNPPKRPLIFDT	0.196985	O14802	1374	0	O14802_1374(m3_s2 : 0.1969848706311428)
a7	341	LGIRQGGKAPVTPRG	0.191376	Q12888	1390	0	Q12888_1390(m3_s2 : 0.1913756126756754)
a7	342	TERQLRYKEKVAELR	0.192936	O95251	261	0	O95251_261(m3_s2 : 0.1929358500999001)
a7	343	QRAQYVEKTKNILMF	0.268175	Q6PD62	884	0	Q6PD62_884(m3_s2 : 0.2681747334730228)
a7	344	GLAAAAAKLAQQELQ	0.201916	Q9UPP1	915	0	Q9UPP1_915(m3_s2 : 0.2019163528739854)
a7	345	AVEMKNDKSEEEQSS	0.190375	P07910	232	0	P07910_232(m3_s2 : 0.1903750818902188)
a7	346	GLIDGLTKFFTPSPD	0.193194	Q92794	415	0	Q92794_415(m3_s2 : 0.1931943065501437)
a7	347	RKERKRHKTDPSAAG	0.213872	Q96L91	2293	0	Q96L91_2293(m3_s2 : 0.2138724211492363)
a7	348	KLEAIDKKNPYLICP	0.193822	Q9UQR0	184	0	Q9UQR0_184(m3_s2 : 0.1938223671991366)
a7	349	TGGKARAKAKSRSSR	0.284475	P16104	14	0	P16104_14(m3_s2 : 0.2844747762048367)
a7	350	KELHQQYKEASEVKP	0.195738	O60341	463	0	O60341_463(m3_s2 : 0.1957379029816067)
a7	351	QEESERAKSDESIKE	0.204615	P26358	188	0	P26358_188(m3_s2 : 0.2046146536460168)
a7	352	NVGFVFTKEDLTEIR	0.193289	P05388	92	0	P05388_92(m3_s2 : 0.193288521627926)
a7	353	EPGAHDAKLRFESQE	0.192619	O96028	97	0	O96028_97(m3_s2 : 0.1926185060507735)
a7	354	DDIKSKKKREQSNDI	0.200434	P45973	106	0	P45973_106(m3_s2 : 0.2004339634871527)
a7	355	KSMLSKLKHECGAAF	0.18892	Q13620	634	0	Q13620_634(m3_s2 : 0.1889196600051069)
a7	356	SQNPHGLKQIGLDQI	0.199963	Q13616	13	0	Q13616_13(m3_s2 : 0.1999631289991112)
a7	357	DRKRESTKMAEAIRN	0.197707	Q9Y232	422	0	Q9Y232_422(m3_s2 : 0.1977072334617399)
a7	358	VFKNMPAKTELIVRV	0.210394	Q12873	979	0	Q12873_979(m3_s2 : 0.210394289366291)
a7	359	LSRDLAKKEALSGAG	0.228634	O14646	1320	0	O14646_1320(m3_s2 : 0.2286344589163348)
a7	360	VLQAHQAKEAAQKAV	0.189492	P11940	620	0	P11940_620(m3_s2 : 0.1894920223237051)
a7	361	CQACRLRKCYEVGMM	0.221806	P03372	244	0	P03372_244(m3_s2 : 0.2218057372100442)
a7	362	EITYGLKKNVYEQQK	0.200582	Q9UPA5	3414	0	Q9UPA5_3414(m3_s2 : 0.2005819642971653)
a7	363	QKMNRDNKEGQEPAK	0.212474	Q8NHM5	758	0	Q8NHM5_758(m3_s2 : 0.2124740010809765)
a7	364	TDSATHRKMTLSLAD	0.201802	Q8WVC0	503	0	Q8WVC0_503(m3_s2 : 0.2018023206302647)
a7	365	RVHRLLRKGHYAERV	0.211425	P16104	37	0	P16104_37(m3_s2 : 0.2114253950384056)
a7	366	VKGGKNSKYAPAEGN	0.194032	Q96T88	546	0	Q96T88_546(m3_s2 : 0.1940323645572394)
a7	367	EMAFPRVKPAPDETS	0.210833	Q12905	45	0	Q12905_45(m3_s2 : 0.2108333314339641)
a7	368	VREYKGHKQYEELLA	0.19222	Q9BZ95	334	0	Q9BZ95_334(m3_s2 : 0.1922204876341142)
a7	369	IENFKSYKGRQIIGP	0.220341	Q14683	16	0	Q14683_16(m3_s2 : 0.2203414741074201)
a7	370	QKHKDKWKHPERADA	0.242532	Q9P0U4	359	0	Q9P0U4_359(m3_s2 : 0.2425321156423563)
a7	371	PQLKFREKIDNSNTP	0.206995	Q01780	190	0	Q01780_190(m3_s2 : 0.2069945595235147)
a7	372	VAAMESPKLPSGAYE	0.187418	Q12873	1044	0	Q12873_1044(m3_s2 : 0.1874175911577147)
a7	373	KANHLEDKINIIEKR	0.193597	Q9NVM4	451	0	Q9NVM4_451(m3_s2 : 0.1935974295959056)
a7	374	PVKHQVWKQKGEEYR	0.187961	Q12830	1020	0	Q12830_1020(m3_s2 : 0.1879607264783005)
a7	375	LFLQAFEKPTQIYRF	0.189427	Q15022	92	0	Q15022_92(m3_s2 : 0.1894271138770066)
a7	376	SEGREIFKPRQLPGS	0.21217	Q8NEZ4	870	0	Q8NEZ4_870(m3_s2 : 0.2121703203392244)
a7	377	PVEVQKGKRPSGRDT	0.19558	Q15058	908	0	Q15058_908(m3_s2 : 0.1955803543693299)
a7	378	NPFQKNPKHASVLAE	0.19822	Q96L91	2493	0	Q96L91_2493(m3_s2 : 0.1982195131483532)
a7	379	KVEELRRKIQELFHV	0.18874	Q96T88	31	0	Q96T88_31(m3_s2 : 0.1887398722156198)
a7	380	MFNLKDPKNQGLFHR	0.201173	Q9BTC0	736	0	Q9BTC0_736(m3_s2 : 0.2011730302137793)
a7	381	EGKIVDAKAIFTGHS	0.189436	Q16576	219	0	Q16576_219(m3_s2 : 0.1894359353420477)
a7	382	KLGYANAKIYKLDDP	0.191885	P41091	87	0	P41091_87(m3_s2 : 0.191885358941475)
a7	383	KDPEPPEKEFTPYDY	0.187866	Q01780	813	0	Q01780_813(m3_s2 : 0.1878663357929384)
a7	384	LQMAVQGKRPMPGMQ	0.214759	P51532	207	0	P51532_207(m3_s2 : 0.2147589098532524)
a7	385	GLDTRGLKAELAERL	0.225273	Q9BUJ2	26	0	Q9BUJ2_26(m3_s2 : 0.2252734036036191)
a7	386	ATNPAPGKGTGSGLI	0.190083	Q14781	390	0	Q14781_390(m3_s2 : 0.1900828912785809)
a7	387	GLAAAAAKLSQQEEQ	0.190637	O75151	940	0	O75151_940(m3_s2 : 0.1906370357696002)
a7	388	YIAMCREKQPMVPES	0.193289	P33993	569	0	P33993_569(m3_s2 : 0.1932887874193278)
a7	389	KWRGWSPKYNTWEPE	0.184989	O00257	38	0	O00257_38(m3_s2 : 0.1849893560085868)
a7	390	VGLLREHKIQTNRYT	0.190054	Q13315	2431	0	Q13315_2431(m3_s2 : 0.1900536491074263)
a7	391	KLESVRDKFQETSDE	0.187394	Q14683	1037	0	Q14683_1037(m3_s2 : 0.1873943171816058)
a7	392	DERLGKEKATLIIRP	0.185156	Q9UPP1	665	0	Q9UPP1_665(m3_s2 : 0.1851560199026748)
a7	393	KKSSEFLKHAGKETI	0.188043	Q9BYW2	922	0	Q9BYW2_922(m3_s2 : 0.1880427911177358)
a7	394	GAGPLRGKTSGTEPA	0.1869	Q12888	1340	0	Q12888_1340(m3_s2 : 0.1868996707458651)
a7	395	KLFVGGIKEDTEEHH	0.184611	P22626	120	0	P22626_120(m3_s2 : 0.1846108216383252)
a7	396	ILNANPMKPKDGSEE	0.189145	Q7L590	360	0	Q7L590_360(m3_s2 : 0.1891452125287196)
a7	397	EQIEHWKKIVKTQEE	0.192978	O60341	433	0	O60341_433(m3_s2 : 0.1929780366135138)
a7	398	AKFDPSTKIYEISNR	0.190903	Q01780	716	0	Q01780_716(m3_s2 : 0.1909034298638286)
a7	399	QSDIAITKDMFEEAL	0.19473	P33991	837	0	P33991_837(m3_s2 : 0.1947300342945283)
a7	400	NSNMTYEKLSRAMRY	0.216886	P78545	328	0	P78545_328(m3_s2 : 0.2168855172016559)
a7	401	KKGARKSKKKQGEVS	0.219773	O75367	159	0	O75367_159(m3_s2 : 0.2197732981231661)
a7	402	NSIKKKQKDPQDILE	0.217145	Q7L590	686	0	Q7L590_686(m3_s2 : 0.2171454957465376)
a7	403	DELPEHFKPSQLIKD	0.192973	O75151	427	0	O75151_427(m3_s2 : 0.1929730833996199)
a7	404	VEAALVSKISSPSDK	0.190491	O96028	191	0	O96028_191(m3_s2 : 0.190491208585854)
a7	405	KIEKEQSKQAVEMKN	0.203497	P07910	223	0	P07910_223(m3_s2 : 0.2034969623020156)
a7	406	VDEAHRLKNDDSLLY	0.18826	O14646	620	0	O14646_620(m3_s2 : 0.1882598419266185)
a7	407	TDESGKSKGFGFVSF	0.185555	P11940	231	0	P11940_231(m3_s2 : 0.1855554565974231)
a7	408	CYEVGMMKGGIRKDR	0.243321	P03372	252	0	P03372_252(m3_s2 : 0.2433214246394672)
a7	409	VTQIIQTKGPLPAGT	0.183721	P51610	713	0	P51610_713(m3_s2 : 0.1837207326076636)
a7	410	RLKADVFKNMPAKTE	0.192703	Q8TDI0	938	0	Q8TDI0_938(m3_s2 : 0.1927028284080768)
a7	411	KNFKDKPKLPENYTD	0.183421	Q13620	207	0	Q13620_207(m3_s2 : 0.1834207193533604)
a7	412	KKGMATAKQRLGKIL	0.26324	O75151	1079	0	O75151_1079(m3_s2 : 0.263239825510366)
a7	413	REMRHKLKTAFKNFI	0.194233	Q9Y5B9	777	0	Q9Y5B9_777(m3_s2 : 0.1942327498840922)
a7	414	LAKNPKGKDIEDGDK	0.184938	Q13620	800	0	Q13620_800(m3_s2 : 0.1849384528213482)
a7	415	KCCSGILKEMFAKKH	0.189948	O60885	362	0	O60885_362(m3_s2 : 0.189948062514984)
a7	416	VVTYTGDKDSRAIIR	0.191889	Q12873	820	0	Q12873_820(m3_s2 : 0.191888744283811)
a7	417	RMVDVVEKEDVNEAI	0.183395	P33993	627	0	P33993_627(m3_s2 : 0.1833945382306941)
a7	418	RKDPHGEKREFQDAP	0.184525	Q9BTC0	1852	0	Q9BTC0_1852(m3_s2 : 0.1845245462894752)
a7	419	VIAQGIGKLASVPAG	0.186379	P05387	61	0	P05387_61(m3_s2 : 0.1863793846034359)
a7	420	KKIGVFSKDKFPGEF	0.183053	Q9Y5B9	139	0	Q9Y5B9_139(m3_s2 : 0.1830528095822517)
a7	421	DAVRHARKHFSQAEG	0.189875	Q7L5Y9	223	0	Q7L5Y9_223(m3_s2 : 0.1898752172236304)
a7	422	EIGGDVQKHAEMVHT	0.183069	Q01518	71	0	Q01518_71(m3_s2 : 0.1830691212626794)
a7	423	DTAEKPGKEEDVVTP	0.183108	Q14676	1852	0	Q14676_1852(m3_s2 : 0.1831082870927626)
a7	424	VCRPKRTKASMSEFL	0.181953	Q15022	537	0	Q15022_537(m3_s2 : 0.1819534517436618)
a7	425	MDIIRLNKLEDTITL	0.184999	O60678	301	0	O60678_301(m3_s2 : 0.1849994301704855)
a7	426	VCYADVQKDGVGMVE	0.183009	Q13242	144	0	Q13242_144(m3_s2 : 0.1830094351170577)
a7	427	GWVAMAPKPGPYVKE	0.190953	Q01518	149	0	Q01518_149(m3_s2 : 0.1909531083585312)
a7	428	TPATGAPKPQGTKIV	0.185571	O95602	531	0	O95602_531(m3_s2 : 0.1855710722752019)
a7	429	WWFKKFCKGDESLED	0.185255	Q53H47	395	0	Q53H47_395(m3_s2 : 0.1852549822731297)
a7	430	DTITRSAKPLEPWLF	0.191504	Q9H7Z3	1029	0	Q9H7Z3_1029(m3_s2 : 0.1915044933543228)
a7	431	TTGLAWSKTGPVAKE	0.200295	Q01518	209	0	Q01518_209(m3_s2 : 0.20029509704721)
a7	432	EMAPKSKKKGHPGRE	0.198636	O60885	727	0	O60885_727(m3_s2 : 0.1986359886192006)
a7	433	LNEALELKDAQAGKE	0.207338	P04637	351	0	P04637_351(m3_s2 : 0.2073381348604794)
a7	434	AFRAWTRKEALPDHE	0.1828	Q9UPP1	446	0	Q9UPP1_446(m3_s2 : 0.1828002892542382)
a7	435	QERKRRQKHQEYLNS	0.202834	P51532	471	0	P51532_471(m3_s2 : 0.202833566878765)
a7	436	GKARAKAKSRSSRAG	0.295691	P16104	16	0	P16104_16(m3_s2 : 0.2956906754660277)
a7	437	KQQVPFAKPLPTFAK	0.185511	Q96L91	2349	0	Q96L91_2349(m3_s2 : 0.1855110868290803)
a7	438	QFNYHRKKNIAAERK	0.188087	Q14683	190	0	Q14683_190(m3_s2 : 0.1880865279792435)
a7	439	HTENDHHKFHPLPRF	0.200005	Q92833	747	0	Q92833_747(m3_s2 : 0.2000046197343132)
a7	440	LRLRGHQKEGYGLSW	0.185401	Q16576	177	0	Q16576_177(m3_s2 : 0.1854010260050038)
a7	441	AKGQQMRKGPSAKRR	0.223548	Q99848	235	0	Q99848_235(m3_s2 : 0.2235482919160739)
a7	442	VEKLSVLKRKAVESI	0.188386	Q7L5Y9	82	0	Q7L5Y9_82(m3_s2 : 0.1883856752669387)
a7	443	VRAQSRDKQIEERML	0.184872	O95251	229	0	O95251_229(m3_s2 : 0.1848723168367713)
a7	444	IWGAYDGKFEKTISG	0.19186	P61964	78	0	P61964_78(m3_s2 : 0.1918601015351613)
a7	445	QPVQYGQKPEGRTVA	0.210117	Q96L91	1472	0	Q96L91_1472(m3_s2 : 0.2101170629399386)
a7	446	NIYRLVTKGSVEEDI	0.18252	O14646	915	0	O14646_915(m3_s2 : 0.1825200973048142)
a7	447	NAGPKEGKIVDAKAI	0.185793	Q16576	214	0	Q16576_214(m3_s2 : 0.1857933189755811)
a7	448	QLQEKHVKDEQIEHW	0.183548	O60341	424	0	O60341_424(m3_s2 : 0.1835483900141476)
a7	449	YKVQPTKKELHESAI	0.194569	Q9NRL2	199	0	Q9NRL2_199(m3_s2 : 0.1945693083403951)
a7	450	DEDSGPYKHISPGDT	0.182175	P24928	619	0	P24928_619(m3_s2 : 0.1821750883916132)
a7	451	VSKEEEEKERNTAAM	0.215319	P23921	770	0	P23921_770(m3_s2 : 0.2153185887514699)
a7	452	RKRAKKAKQAFEQIK	0.194184	Q14683	1056	0	Q14683_1056(m3_s2 : 0.1941839799786943)
a7	453	WPQHLKEKQTEATNA	0.183621	Q8NHM5	210	0	Q8NHM5_210(m3_s2 : 0.1836212874625104)
a7	454	LQHAKDFKEYHRSVT	0.190314	P51532	487	0	P51532_487(m3_s2 : 0.1903136892551343)
a7	455	TPDPAALKDRRMENL	0.196148	Q92793	622	0	Q92793_622(m3_s2 : 0.1961479191788149)
a7	456	EVFNKFFKERVMEIV	0.188025	Q9Y5B9	199	0	Q9Y5B9_199(m3_s2 : 0.1880252485330665)
a7	457	MEIYRPHKANAEEMT	0.183701	Q13547	58	0	Q13547_58(m3_s2 : 0.1837014154341376)
a7	458	VSVNLLSKNLSREIN	0.200308	O76021	188	0	O76021_188(m3_s2 : 0.2003075365336938)
a7	459	KKGETLRKQTEEKEK	0.235637	Q9NR30	25	0	Q9NR30_25(m3_s2 : 0.2356365224894615)
a7	460	SKQAVEMKNDKSEEE	0.184693	P07910	229	0	P07910_229(m3_s2 : 0.1846931083912603)
a7	461	IKLCMLAKARESASA	0.292467	P26358	1599	0	P26358_1599(m3_s2 : 0.2924668278317409)
a7	462	QPLQLTTKPDLLAWD	0.196796	O00257	365	0	O00257_365(m3_s2 : 0.196796325117572)
a7	463	YEISNRWKLAQVQVQ	0.224202	Q01780	725	0	Q01780_725(m3_s2 : 0.2242017761741045)
a7	464	LDELPIFKSEFITHD	0.181247	Q9BYW2	637	0	Q9BYW2_637(m3_s2 : 0.1812473295054082)
a7	465	IGVPETPKETPTPQR	0.179148	Q12830	1978	0	Q12830_1978(m3_s2 : 0.1791483955287261)
a7	466	NGFRSKLKEVGQAQL	0.206361	Q92833	775	0	Q92833_775(m3_s2 : 0.2063609360443725)
a7	467	AVLELRKKNGPLEVA	0.194609	O75367	251	0	O75367_251(m3_s2 : 0.1946085507525662)
a7	468	DEKVRHSKLAESVEK	0.182062	Q9Y5B9	216	0	Q9Y5B9_216(m3_s2 : 0.1820618092516912)
a7	469	RDAELVDKSETDLRR	0.223794	O14646	1160	0	O14646_1160(m3_s2 : 0.223794143315687)
a7	470	FIQLPSRKELPEYYE	0.207174	P51532	1492	0	P51532_1492(m3_s2 : 0.2071736452162645)
a7	471	QRELGRVKDEIQRLE	0.200252	Q9UFE4	98	0	Q9UFE4_98(m3_s2 : 0.2002521059322702)
a7	472	SARIAVKKAQLRSAP	0.194536	Q92831	79	0	Q92831_79(m3_s2 : 0.1945361848149548)
a7	473	AAVADKKKGLMGPLT	0.19452	O75528	223	0	O75528_223(m3_s2 : 0.1945196163049648)
a7	474	VKKLAVTKPNNIKSM	0.181342	P09884	130	0	P09884_130(m3_s2 : 0.1813423104285936)
a7	475	KNIEEDRKLLIQAAI	0.202972	Q13616	708	0	Q13616_708(m3_s2 : 0.2029718078902758)
a7	476	VGRFKSRKEREAELG	0.19432	Q13310	177	0	Q13310_177(m3_s2 : 0.1943200712409384)
a7	477	DLIGLENKITRHEAE	0.204205	Q96L91	1421	0	Q96L91_1421(m3_s2 : 0.2042053484684038)
a7	478	LALNLQEKSKLESEL	0.191472	Q14683	734	0	Q14683_734(m3_s2 : 0.1914724989428589)
a7	479	DHKPELPKERERIEG	0.202109	O15297	223	0	O15297_223(m3_s2 : 0.2021087001220329)
a7	480	KILRLSGKPQNAPEG	0.195538	Q12834	136	0	Q12834_136(m3_s2 : 0.1955378264755927)
a7	481	MQQATWVKYTFPVKH	0.219017	Q12830	1009	0	Q12830_1009(m3_s2 : 0.2190166663609344)
a7	482	VEVTQDHKPELPKER	0.203311	O15297	218	0	O15297_218(m3_s2 : 0.2033113267887313)
a7	483	RAGEAKGKGPKKPSE	0.28725	Q8IZA3	155	0	Q8IZA3_155(m3_s2 : 0.2872503102742064)
a7	484	WEQELNAKRSHLGRI	0.187927	O43463	138	0	O43463_138(m3_s2 : 0.18792652445994)
a7	485	LPPPTILKPVTLWTG	0.190937	O14802	590	0	O14802_590(m3_s2 : 0.1909370147928658)
a7	486	KTREAEEKEKEGIVK	0.18672	Q9Y5B9	640	0	Q9Y5B9_640(m3_s2 : 0.1867195126075653)
a7	487	LSRGNKKKPGMPNVS	0.195762	Q09472	1570	0	Q09472_1570(m3_s2 : 0.1957619403511445)
a7	488	GADNVGSKQMQQIRM	0.189725	P05388	38	0	P05388_38(m3_s2 : 0.1897246322107351)
a7	489	VDKIVLQKYHTINGH	0.185932	P22626	173	0	P22626_173(m3_s2 : 0.1859321183095692)
a7	490	TECLRIAKPNVSAST	0.184994	Q13315	79	0	Q13315_79(m3_s2 : 0.1849936550858827)
a7	491	KKRQQARKTASVLSK	0.234639	O76021	311	0	O76021_311(m3_s2 : 0.2346390674915506)
a7	492	EEGRTRLKLKVENTI	0.181008	Q8WVC0	413	0	Q8WVC0_413(m3_s2 : 0.1810084289216412)
a7	493	KDPRPFFKFAKEIYP	0.181866	Q96EB6	311	0	Q96EB6_311(m3_s2 : 0.1818659015443833)
a7	494	KLAGLEQKLQGTPSN	0.204361	O14686	4501	0	O14686_4501(m3_s2 : 0.2043609584064616)
a7	495	ATAEEMTKYHSDEYI	0.183624	Q92769	67	0	Q92769_67(m3_s2 : 0.1836241651037438)
a7	496	TVVYSSNKIDDTIRY	0.189076	Q6UXN9	84	0	Q6UXN9_84(m3_s2 : 0.1890759066295612)
a7	497	IGAVLAHKGYFREAR	0.177903	Q6PD62	660	0	Q6PD62_660(m3_s2 : 0.1779031442306321)
a7	498	KKGKGGTKTLMNTIM	0.182692	P51532	1033	0	P51532_1033(m3_s2 : 0.1826920286481965)
a7	499	IPVFPDTKPYGALGL	0.178791	O14686	4756	0	O14686_4756(m3_s2 : 0.1787911180467283)
a7	500	EREKENSKREEEEQQ	0.189152	Q96T88	626	0	Q96T88_626(m3_s2 : 0.1891522479999278)
a7	501	RNEQYRGKNPLLVPL	0.188879	Q15047	597	0	Q15047_597(m3_s2 : 0.1888787212028046)
a7	502	EDICLFTKDEPNSTP	0.177153	O76021	100	0	O76021_100(m3_s2 : 0.1771527089076342)
a7	503	EINKALTKDPQDYPD	0.185776	P09884	1141	0	P09884_1141(m3_s2 : 0.1857756906614493)
a7	504	LKQIANTKGNENANG	0.187154	Q9Y5B9	92	0	Q9Y5B9_92(m3_s2 : 0.1871538318181243)
a7	505	ESKKRKRKPYRPGIG	0.209994	O14686	1690	0	O14686_1690(m3_s2 : 0.2099937960453422)
a7	506	EIKLKITKTIQNGRE	0.183364	Q9BZ95	159	0	Q9BZ95_159(m3_s2 : 0.1833642548495444)
a7	507	HDLLRLAKEEVSRQE	0.216572	O75528	372	0	O75528_372(m3_s2 : 0.2165719718149452)
a7	508	LIGKKTQKTAITVEH	0.178029	Q9NR30	406	0	Q9NR30_406(m3_s2 : 0.1780288885488929)
a7	509	KGYLGAVKPLAGAAG	0.232636	O00257	212	0	O00257_212(m3_s2 : 0.2326358104517155)
a7	510	ICFLKNEKFINAMKE	0.19747	Q13620	539	0	Q13620_539(m3_s2 : 0.1974702866745032)
a7	511	VQASEHTKSKHESRK	0.187861	Q9BZ95	187	0	Q9BZ95_187(m3_s2 : 0.1878608920906026)
a7	512	AVKADLGKIVLTNPV	0.192024	P41091	426	0	P41091_426(m3_s2 : 0.1920240357483472)
a7	513	VDSLTLLKCGENTSP	0.178205	Q9BYW2	899	0	Q9BYW2_899(m3_s2 : 0.1782051274772474)
a7	514	SAIIHIKKHQVSVEG	0.185289	Q14676	540	0	Q14676_540(m3_s2 : 0.1852890752371526)
a7	515	SSPQPKKKPLDGEYF	0.176409	P04637	321	0	P04637_321(m3_s2 : 0.1764093202766607)
a7	516	VPQPAILKPRPLWTG	0.180598	P24928	581	0	P24928_581(m3_s2 : 0.1805978426148138)
a7	517	DYSQSDFKAFAGNSK	0.209033	Q01780	826	0	Q01780_826(m3_s2 : 0.2090331280711259)
a7	518	KLILSKGKTPALKYQ	0.190746	P33991	814	0	P33991_814(m3_s2 : 0.1907462610699204)
a7	519	VLPEVKPKVEEGGRH	0.181857	O14686	3121	0	O14686_3121(m3_s2 : 0.181857335486158)
a7	520	EMETLATKQALEDHS	0.191417	Q15058	1037	0	Q15058_1037(m3_s2 : 0.1914165641286628)
a7	521	SGGAVEQKVGNTGGP	0.177893	Q14781	320	0	Q14781_320(m3_s2 : 0.1778930070185016)
a7	522	GELNLMKKAASITSE	0.176693	Q9Y5B9	185	0	Q9Y5B9_185(m3_s2 : 0.1766926819440828)
a7	523	GFLGVRPKNQPIATE	0.176481	Q96L73	2086	0	Q96L73_2086(m3_s2 : 0.1764806034189388)
a7	524	AKGQVLTKTNPNSIK	0.199336	Q7L590	675	0	Q7L590_675(m3_s2 : 0.1993357386861963)
a7	525	KEAQLKAKEEMMQGI	0.17676	Q15058	951	0	Q15058_951(m3_s2 : 0.1767604936318452)
a7	526	VPENWLHKEAHQLFL	0.17687	P39748	277	0	P39748_277(m3_s2 : 0.1768701283666392)
a7	527	SGSWQDLKDHMREAG	0.203255	Q13242	128	0	Q13242_128(m3_s2 : 0.2032552681267356)
a7	528	IPEMPSPKKMHQGKK	0.205902	P26358	716	0	P26358_716(m3_s2 : 0.2059023035962555)
a7	529	ECEIQLLKNLLHERI	0.196947	Q9Y2U5	411	0	Q9Y2U5_411(m3_s2 : 0.1969468869352963)
a7	530	AEEDFYEKLAASIAP	0.180254	P33993	335	0	P33993_335(m3_s2 : 0.1802542657893789)
a7	531	KNPSLMPKEPHIREM	0.183646	Q9Y5B9	520	0	Q9Y5B9_520(m3_s2 : 0.1836463904199955)
a7	532	TGTPISMKDVYEEFD	0.176275	P09884	411	0	P09884_411(m3_s2 : 0.1762747201756092)
a7	533	KGSLDLQKCNMSPVV	0.178864	Q9BZ95	494	0	Q9BZ95_494(m3_s2 : 0.1788644912595317)
a7	534	MEIYRPHKATAEEMT	0.180789	Q92769	59	0	Q92769_59(m3_s2 : 0.1807887416901766)
a7	535	LEVPRFDKENPFEGL	0.175105	Q13315	1782	0	Q13315_1782(m3_s2 : 0.1751050228739573)
a7	536	AATAASKKFPGSAAL	0.226314	Q9BTC0	627	0	Q9BTC0_627(m3_s2 : 0.2263141817864541)
a7	537	LDKLDNEKKDLIQSD	0.190264	Q9NRG4	145	0	Q9NRG4_145(m3_s2 : 0.1902641936309469)
a7	538	VYVYKVLKQVHPDTG	0.209341	O60814	47	0	O60814_47(m3_s2 : 0.2093412673151653)
a7	539	NDSPTLKKLDELPIF	0.175103	Q9BYW2	629	0	Q9BYW2_629(m3_s2 : 0.1751029474379022)
a7	540	GGEEMDNKFGVEQPE	0.203985	P24928	163	0	P24928_163(m3_s2 : 0.2039853275483431)
a7	541	WSSYGKRKTLTETIY	0.176148	Q7L2J0	627	0	Q7L2J0_627(m3_s2 : 0.176148366887561)
a7	542	KLYATMEKHKEVFFV	0.1759	Q92793	1627	0	Q92793_1627(m3_s2 : 0.1758999838207842)
a7	543	YGSAQRRKMRPFEGF	0.176409	Q9BUJ2	517	0	Q9BUJ2_517(m3_s2 : 0.1764088739504448)
a7	544	SPVKRPRKEPVDEDL	0.181944	P26358	961	0	P26358_961(m3_s2 : 0.1819437437613074)
a7	545	MDKLMMDKYPGIRQI	0.19704	O95602	413	0	O95602_413(m3_s2 : 0.1970398817978739)
a7	546	KHAAATMKFLSSGKE	0.218048	Q9BTC0	427	0	Q9BTC0_427(m3_s2 : 0.2180475666572544)
a7	547	YKLWKAGKDNTVIDH	0.177047	O75164	336	0	O75164_336(m3_s2 : 0.1770468574494905)
a7	548	DGIYKVVKYWPEKGK	0.238065	Q96T88	563	0	Q96T88_563(m3_s2 : 0.238064861386312)
a7	549	LAAAPGEKLPLFPEP	0.177189	P26358	1323	0	P26358_1323(m3_s2 : 0.1771889856528085)
a7	550	VWGEEFEKLYASYEK	0.18056	P23921	369	0	P23921_369(m3_s2 : 0.180560067450601)
a7	551	SILKGVLKVGQEIEV	0.194399	P41091	289	0	P41091_289(m3_s2 : 0.1943991297070127)
a7	552	ENQKRIEKLEEYITT	0.185771	Q14683	437	0	Q14683_437(m3_s2 : 0.1857709656442907)
a7	553	PTNWRLGKLLGQGAF	0.177251	Q9Y2U5	360	0	Q9Y2U5_360(m3_s2 : 0.1772514170645416)
a7	554	QRNQDRSKSAAELEK	0.213616	Q99549	370	0	Q99549_370(m3_s2 : 0.2136162626608287)
a7	555	GPGPGRPKSKNLQPK	0.219376	O75528	122	0	O75528_122(m3_s2 : 0.2193758811932349)
a7	556	ERIKTPPKRPGGRRR	0.180795	Q15910	348	0	Q15910_348(m3_s2 : 0.1807950033338938)
a7	557	RPFFKFAKEIYPGQF	0.174691	Q96EB6	314	0	Q96EB6_314(m3_s2 : 0.1746911556021726)
a7	558	QRDPSLRKSGVGNIF	0.182055	P11940	95	0	P11940_95(m3_s2 : 0.1820554886277613)
a7	559	NRQPTLHKMSMMGHR	0.196786	P24928	466	0	P24928_466(m3_s2 : 0.1967859691146022)
a7	560	ELLAEATKQASNHSE	0.217694	Q9BZ95	345	0	Q9BZ95_345(m3_s2 : 0.217694332893396)
a7	561	KKRKRSRKESYSVYV	0.227617	O60814	35	0	O60814_35(m3_s2 : 0.2276170208411797)
a7	562	AEFLQSQKTAHETDK	0.181327	P83916	72	0	P83916_72(m3_s2 : 0.1813274895125564)
a7	563	ELFRQCTKNEVTKEM	0.17613	Q15058	1449	0	Q15058_1449(m3_s2 : 0.176130101077984)
a7	564	GRTRLKLKVENTIRW	0.184685	Q8WVC0	415	0	Q8WVC0_415(m3_s2 : 0.1846847383494214)
a7	565	EDTDDRNKMSVVTES	0.202383	Q15047	1050	0	Q15047_1050(m3_s2 : 0.2023834444448745)
a7	566	PSVVSDLKSGTNEDD	0.174014	O14802	271	0	O14802_271(m3_s2 : 0.1740141503812318)
a7	567	PFRTSRKKFLEVPRF	0.180184	Q13315	1773	0	Q13315_1773(m3_s2 : 0.1801835542947117)
a7	568	RLKAKTPKNGPPPCP	0.180017	P51610	129	0	P51610_129(m3_s2 : 0.180016973630146)
a7	569	NAGFEKNKEPGEIQY	0.175782	O14646	311	0	O14646_311(m3_s2 : 0.1757816183088016)
a7	570	RRLRGQKKIGNPLLH	0.241283	O15297	589	0	O15297_589(m3_s2 : 0.2412825488373324)
a7	572	VRAMAIYKQSQHMTE	0.176723	P04637	164	0	P04637_164(m3_s2 : 0.1767225146673374)
a7	573	TPKIGMGKPAITKRK	0.182685	Q8NEZ4	827	0	Q8NEZ4_827(m3_s2 : 0.1826845053395492)
a7	574	HFKQSAEKLIEEKGA	0.185064	Q9NR30	600	0	Q9NR30_600(m3_s2 : 0.1850644408216168)
a7	575	SPFAMDKKAVPGGGM	0.179865	Q09472	292	0	Q09472_292(m3_s2 : 0.1798654071806064)
a7	576	VEYFLKWKGFTDADN	0.178875	Q13185	52	0	Q13185_52(m3_s2 : 0.1788745570342205)
a7	577	PKKMKKEKEMNGETR	0.172555	Q9NR30	137	0	Q9NR30_137(m3_s2 : 0.1725552414526737)
a7	578	THILLSTKSSENNSL	0.182868	Q9Y232	360	0	Q9Y232_360(m3_s2 : 0.1828677745717345)
a7	579	LGAMARDKGNFYEAS	0.173522	Q6PD62	544	0	Q6PD62_544(m3_s2 : 0.1735215171746454)
a7	580	PPPGKSGKYYYQLNS	0.229993	O00257	149	0	O00257_149(m3_s2 : 0.2299933331301276)
a7	581	REQQQIEKEIKEKDS	0.243205	Q14683	282	0	Q14683_282(m3_s2 : 0.2432045446442314)
a7	582	KRRLTEQKGEQQIQK	0.184789	Q9Y5B9	497	0	Q9Y5B9_497(m3_s2 : 0.1847894511131255)
a7	583	VAREESGKPGAHVTV	0.198917	P22626	104	0	P22626_104(m3_s2 : 0.1989173267164028)
a7	584	IKVEKGDKQTVVSST	0.182604	Q12830	1736	0	Q12830_1736(m3_s2 : 0.1826041099825298)
a7	585	GGGGGGFKHPAFKRR	0.194621	Q7L2J0	163	0	Q7L2J0_163(m3_s2 : 0.1946205678787467)
a7	586	EKLKDKEKVSKEEEE	0.20768	P23921	762	0	P23921_762(m3_s2 : 0.2076795910690772)
a7	587	DKNGKDLKETTVLVA	0.193886	P13611	79	0	P13611_79(m3_s2 : 0.1938861457602149)
a7	588	EDLYELFKKDPGFDR	0.184693	Q9BTU6	406	0	Q9BTU6_406(m3_s2 : 0.1846933300423592)
a7	589	LDLGAQGKGQGHQYE	0.195391	O00257	114	0	O00257_114(m3_s2 : 0.1953907982872803)
a7	590	RPLLSQLKGPRGGPP	0.18013	Q9BTC0	1901	0	Q9BTC0_1901(m3_s2 : 0.1801303396521045)
a7	591	EHYVGSDKEIDVIDV	0.182176	Q9UPP1	191	0	Q9UPP1_191(m3_s2 : 0.1821759763321285)
a7	592	NLKQHLAKATASGIM	0.199684	Q7L590	539	0	Q7L590_539(m3_s2 : 0.199683729547908)
a7	593	PDTGISSKAMSIMNS	0.198088	Q96A08	59	0	Q96A08_59(m3_s2 : 0.1980882713712392)
a7	594	LRKLDDTKFRSHEGE	0.179493	Q13242	169	0	Q13242_169(m3_s2 : 0.1794929755879196)
a7	595	EAPSAKVKLLIGAYR	0.23618	Q99549	849	0	Q99549_849(m3_s2 : 0.2361803602374278)
a7	596	TQQVFDAKNMMAACD	0.178773	P07437	297	0	P07437_297(m3_s2 : 0.1787728483401098)
a7	597	KPLPTFAKPTAEPGQ	0.180007	Q96L91	2356	0	Q96L91_2356(m3_s2 : 0.1800073261445253)
a7	598	DLRQVRGKASFLYSL	0.182142	Q92466	278	0	Q92466_278(m3_s2 : 0.1821421015503606)
a7	599	HGKTFDYKIPYTTVL	0.174303	Q08945	233	0	Q08945_233(m3_s2 : 0.1743028778080879)

## Sheet: Table 9
Supplementary Table 9. SET8 ML-hybrid ensemble model predictions for the entire proteome, isolated to the surface exposed lysine sites. ML score and resulting prediction is listed, considering the 0.82 cutoff.
Uniprot ID	Position	Site	SET8 ML-Hybrid Ensemble Score	Predicted SET8 Methylation (0=no, 1=yes)
P16403	187	AKPKKAAKSAAKAVK	0.887438	1
P16403	168	PAAATVTKKVAKSPK	0.886231	1
P10412	148	ATGAATPKKSAKKTP	0.885147	1
Q92522	196	TAAAGGKKVKKAAKP	0.884961	1
P83731	147	QKIVKPVKVSAPRVG	0.884956	1
P16403	157	SAKKTPKKAKKPAAA	0.884562	1
P07305	155	KKLAATPKKAKKPKT	0.881746	1
Q13428	1475	DSESPSQKKKKKKKK	0.880499	1
P68431	15	ARKSTGGKAPRKQLA	0.880359	1
P62807	21	GSKKAVTKAQKKDGK	0.879545	1
P68431	19	TGGKAPRKQLATKAA	0.87925	1
P57053	21	GSKKAVTKAQKKDGR	0.879206	1
Q9Y2S6	50	LKAKAAGKGPLATGG	0.878682	1
P62701	16	LKRVAAPKHWMLDKL	0.878641	1
P46777	283	KKDRVAQKKASFLRA	0.878162	1
Q12894	489	LYNAAAFKARTKARS	0.878154	1
P46777	5	AAAMGFVKVVKNKAY	0.877802	1
Q8NFP7	17	TYDPEGFKKRAACLC	0.877768	1
Q9NR00	97	DKLFQFLKLRKYSIK	0.877658	1
P68431	24	PRKQLATKAARKSAP	0.877568	1
Q9NZJ9	18	TYDREGFKKRAACLC	0.877394	1
Q9UKI2	15	YLKAANNKKGKKFKL	0.877153	1
P61247	27	KVVDPFSKKDWYDVK	0.876517	1
P68104	450	KKAAGAGKVTKSAQK	0.876015	1
Q9Y5K8	20	RMAQTIMKARLKGAQ	0.87577	1
Q9P0U4	355	HRQKQKHKDKWKHPE	0.87569	1
P07305	108	PKKSVAFKKTKKEIK	0.875662	1
Q8N257	25	AVTKAQKKDGKKRKR	0.875436	1
Q5SY16	9	ADSGLLLKRGSCRST	0.875069	1
Q6DN12	13	PSVWGSLKQRTRPLL	0.874992	1
P57053	17	APKKGSKKAVTKAQK	0.874926	1
P62701	22	PKHWMLDKLTGVFAP	0.874926	1
Q9Y4L5	26	RFFCHFCKGEVSPKL	0.874907	1
O15144	295	EMKTITGKTFSSRAA	0.874272	1
Q16695	24	PRKQLATKVARKSAP	0.874171	1
Q92901	20	HLGFLPHKRSHRHRG	0.873539	1
O75691	2745	NPDIAAKKKMKKHKN	0.873251	1
P42166	685	LFGGEVCKVIKKRGN	0.873037	1
P0C0S8	10	GRGKQGGKARAKAKT	0.872624	1
Q9BVP2	11	PKLKKASKRMTCHKR	0.872543	1
Q71UI9	116	GVIPHIHKSLIGKKG	0.872496	1
Q8N257	24	KAVTKAQKKDGKKRK	0.872434	1
O75367	18	TKTSRSAKAGVIFPV	0.872004	1
P16403	119	ASGEAKPKVKKAGGT	0.871787	1
P23528	19	IKVFNDMKVRKSSTP	0.871681	1
A8MW92	567	DKDHYRPKQKKKKKK	0.871516	1
Q13428	1477	ESPSQKKKKKKKKTA	0.871187	1
Q03701	1033	RDAKSIIKKKKHFKK	0.871173	1
P23497	564	KHLTLNNKVQKKRWQ	0.870707	1
Q6NXT2	24	PRKQLATKAARKSTP	0.870658	1
P63313	15	GEIASFDKAKLKKTE	0.87063	1
P68431	37	APATGGVKKPHRYRP	0.870563	1
Q1ZZU3	14	RDLWRHNKSCARNRC	0.870306	1
Q86X95	234	KLDRLEKKKKKKDRK	0.870231	1
P47914	122	GLRLCRPKAKAKAKA	0.870002	1
O75691	2757	HKNKSEAKKRKIEFL	0.869994	1
P07305	145	PKATPVKKAKKKLAA	0.869987	1
Q86X95	241	KKKKKDRKKKKFQKS	0.869982	1
Q7Z6E9	1742	KKKHKKHKKHKKHKK	0.869816	1
P98082	49	RFKGDGVKYKAKLIG	0.869799	1
P0C0S8	16	GKARAKAKTRSSRAG	0.869711	1
Q16695	28	LATKVARKSAPATGG	0.869539	1
P68431	28	LATKAARKSAPATGG	0.86949	1
P17096	55	PSEVPTPKRPRGRPK	0.869289	1
P40429	125	MVVPAALKVVRLKPT	0.869115	1
P84243	37	APSTGGVKKPHRYRP	0.869102	1
P62899	31	EYTINIHKRIHGVGF	0.868938	1
Q96A08	7	AMPEVSSKGATISKK	0.868517	1
Q9Y281	19	IKVFNDMKVRKSSTQ	0.868169	1
Q9UKN7	69	GLHTGPQKTKRKRKA	0.86801	1
P62807	6	AAMPEPAKSAPAPKK	0.868009	1
O75152	665	VKVVSSPKLAPKRKA	0.867639	1
P07305	102	LAKSDEPKKSVAFKK	0.867577	1
P30414	446	KKKGKKQKHCRRHKQ	0.867521	1
P40429	148	LAHEVGWKYQAVTAT	0.867492	1
P68104	439	TVAVGVIKAVDKKAA	0.867294	1
Q15233	467	GAEFAPNKRRRYAAA	0.867201	1
Q86U70	271	LSPRDCLKTCLFQKW	0.867149	1
Q9BVI0	543	FVRVKPKKKKKKKKK	0.867119	1
P04637	382	QSTSRHKKLMFKTEG	0.867093	1
Q14692	20	NSGPKAAKKKKRLLQ	0.867082	1
P33778	29	AQKKDGKKRKRSRKE	0.867058	1
P68431	38	PATGGVKKPHRYRPG	0.867042	1
Q9BQG0	1179	KGFLPETKKRKKRKS	0.86688	1
P53007	306	EVVKLLNKVWKTDAA	0.866879	1
Q9H1E3	184	TVTPSPVKGKGKVGR	0.866819	1
P09661	172	KRGAQLAKDIARRSK	0.866747	1
P04637	386	RHKKLMFKTEGPDSD	0.866745	1
O00585	120	GKKGKGSKGCKRTER	0.866698	1
Q9BW19	23	ELKRPLIKAPSQLPL	0.866577	1
Q9BQ61	128	GGNKLALKTGIVAKK	0.866546	1
Q93009	1096	SRYTYLEKAIKIHNA	0.866519	1
P84098	20	SVLRCGKKKVWLDPN	0.866207	1
Q2NL82	42	LALKTLSKKVRKELS	0.866144	1
Q9Y5Y6	21	KDFGAGLKYNSRHEK	0.865866	1
Q96CP2	49	LVLLTASKDSTKVAG	0.865719	1
Q9BQ61	158	AKYMAEVKKYKAHQC	0.865673	1
Q15361	17	IHTPVSDKKKKKCSI	0.865665	1
P0C0S8	14	QGGKARAKAKTRSSR	0.865616	1
Q66PJ3	298	YKDKRRKKKKKRKKL	0.865559	1
Q9UNX3	13	FVTSDRSKNRKRHFN	0.865557	1
P55199	451	SRSKPKKKSKKHKDK	0.865493	1
P29973	129	NKNDPEKKKKKKDKE	0.865433	1
Q66PJ3	297	KYKDKRRKKKKKRKK	0.865392	1
Q9H6F5	333	AKLKRAKKKQLRSIE	0.865387	1
P22090	37	RPSTGPHKLRECLPL	0.865285	1
P05114	31	LSAKPPAKVEAKPKK	0.865276	1
Q9UKJ3	682	HKKKKKHKKSSKHKR	0.865272	1
Q15361	18	HTPVSDKKKKKCSIH	0.865151	1
Q9H1E3	9	SRPVRNRKVVDYSQF	0.865055	1
O00585	115	GASKTGKKGKGSKGC	0.864967	1
P19338	116	KKGATPGKALVATPG	0.864943	1
P20042	15	FDPTMSKKKKKKKKP	0.864924	1
Q9BVJ6	763	RITTRHKKQLKKCSV	0.864879	1
P68431	57	REIRRYQKSTELLIR	0.864829	1
P38432	194	KKEKCEYKKKAKNPK	0.864613	1
P0C0S8	120	QAVLLPKKTESHHKA	0.864602	1
P55199	450	PSRSKPKKKSKKHKD	0.864598	1
Q9BZL1	13	CNDRLGKKVRVKCNT	0.864477	1
P62899	39	RIHGVGFKKRAPRAL	0.864477	1
Q9NXG2	26	KAQYVLAKRARRCDA	0.864382	1
Q14152	13	QRPENALKRANEFLE	0.86431	1
Q8WXX5	241	FLAQMEAKYCKSSKG	0.864269	1
Q9BVI0	542	EFVRVKPKKKKKKKK	0.864243	1
Q96B36	251	LNTSDFQKLKRKYAA	0.864209	1
P16403	169	AAATVTKKVAKSPKK	0.864151	1
Q9BTE7	23	VAEDGGLKKCKISSY	0.864035	1
P62917	188	KAGRAYHKYKAKRNC	0.863936	1
P39023	373	KFIDTTSKFGHGRFQ	0.863903	1
Q13428	1362	AARTPRSKKKKKLGA	0.863859	1
P09429	157	KLKEKYEKDIAAYRA	0.863749	1
O00585	117	SKTGKKGKGSKGCKR	0.863712	1
Q9BVI0	540	FKEFVRVKPKKKKKK	0.863681	1
Q7Z6E9	1739	KKEKKKHKKHKKHKK	0.863624	1
P84098	144	ILMEHIHKLKADKAR	0.863362	1
Q6ZUT1	204	RKGKQPHKRKKKSRK	0.86329	1
P50914	128	RIIKNEVKKLQKAAL	0.863266	1
P07305	144	KPKATPVKKAKKKLA	0.863139	1
Q8IVF2	1104	KGPQVDVKGPKLDLK	0.863097	1
Q16695	38	PATGGVKKPHRYRPG	0.863071	1
P10412	171	AAGAKKAKSPKKAKA	0.862986	1
Q9UQ35	824	SSSSPPPKQKSKTPS	0.862956	1
Q9BVI0	544	VRVKPKKKKKKKKKT	0.862889	1
Q8IYF1	26	ATKTEPKKLEKYLQK	0.862856	1
P83881	22	CGKHQPHKVTQYKKG	0.862796	1
Q9H1E3	175	KMPKPRLKATVTPSP	0.862767	1
Q7Z6E9	1768	QKHKHKKKKSKKNKD	0.862751	1
P62910	15	VKPKIVKKRTKKFIR	0.862576	1
P61254	103	HVGIHPSKVVITRLK	0.862468	1
Q969Q0	22	CGKHQPHKVTQYKKG	0.862453	1
Q8NE71	26	ESTSPSDKVVKKGKK	0.862412	1
O60353	532	ESCEFFLKHNSKVKH	0.862403	1
A8MW92	569	DHYRPKQKKKKKKKK	0.862384	1
P35268	10	PVKKLVVKGGKKKKQ	0.862344	1
Q9H0E3	1037	LNKNGTVKKVSKLKR	0.862324	1
P83916	9	GKKQNKKKVEEVLEE	0.862312	1
O75167	29	GSQTPPFKRKGKLST	0.862235	1
P0C0S8	119	IQAVLLPKKTESHHK	0.862225	1
P61221	19	NHDKCKPKKCRQECK	0.862219	1
P20042	14	IFDPTMSKKKKKKKK	0.862189	1
Q1ED39	16	DLGLPEKKKKKKVVK	0.862033	1
Q9BTE7	24	AEDGGLKKCKISSYC	0.862025	1
P22392	31	IIKRFEQKGFRLVAM	0.862001	1
Q9UKN7	577	TSLARFLKKTLSEKK	0.861992	1
Q96C19	233	KQRKAAFKELQSTFK	0.86197	1
Q9NXF1	17	DFQKVKLKVGKKKPK	0.861857	1
Q6ZU35	1223	ALAKRKAKAWSDCPQ	0.86184	1
Q5T8A7	751	DRGPPVLKSCLSKSK	0.861778	1
Q9BVJ6	254	IKSKKYHKVVKKGKA	0.861761	1
Q16836	312	KTGEGFYKYKAAAAA	0.861651	1
P09429	59	MSAKEKGKFEDMAKA	0.861583	1
O43164	46	RHAYVSFKPCMTRHE	0.861492	1
O60353	538	LKHNSKVKHKKKHYK	0.861441	1
P49773	21	GGDTIFGKIIRKEIP	0.861335	1
P62917	192	AYHKYKAKRNCWPRV	0.86131	1
P20810	24	GPHLPNKKKHKKQAV	0.861239	1
Q15051	433	AALKFLAKCRKKKKL	0.861236	1
Q99547	153	ITPIKAKKMFLKPQD	0.861198	1
Q8NC60	673	IKGQRIKKSVAYKTK	0.861159	1
A8MW92	573	PKQKKKKKKKKKSKQ	0.861035	1
Q7Z6E9	1736	KKKKKEKKKHKKHKK	0.860862	1
P68431	123	KRVTIMPKDIQLARR	0.860773	1
Q13428	1454	KRKKDKEKKEKKKKA	0.860771	1
P22695	17	FSRFYSLKVAPKVKA	0.860766	1
Q69YH5	560	PKKSQVLKSCRKKKG	0.860657	1
Q9UKJ3	686	KKHKKSSKHKRKHKA	0.860617	1
P52926	26	PAAPAPQKRGRGRPR	0.860424	1
P62273	13	LYWSHPRKFGQGSRS	0.860341	1
Q9NPG3	232	FTALNASKEKKKKKY	0.860246	1
P61221	20	HDKCKPKKCRQECKK	0.860244	1
Q9UNE7	41	NRLFVGRKYPEAAAC	0.860178	1
Q9UPV0	110	LSTSGAIKKKKKKKE	0.860175	1
Q9GZR2	29	PVKTLTRKKNKKKKR	0.860127	1
Q9P227	859	GLKSEFLKQSAARGL	0.860102	1
Q6ZQX7	86	ELAKRKVKKKKRKKK	0.859993	1
P23497	733	IFAKEKGKFEDMAKA	0.859964	1
Q9NZE8	126	CGLWVRRKAGYKKKL	0.859931	1
Q07866	393	NLASCYLKQGKFKQA	0.859922	1
Q9UKJ3	676	SGKSHRHKKKKKHKK	0.859887	1
Q9BYK8	1564	APRSQQLKALCEKHG	0.859878	1
P16403	52	TKAVAASKERSGVSL	0.859826	1
Q5T5C0	1142	HAHEIMLKYKDKKWY	0.859798	1
P09661	149	VRVLDFQKVKLKERQ	0.859691	1
Q5T3I0	21	FAEEQLLKHGWTQGK	0.859685	1
Q9HD23	425	ADRSMELKNSLRLDG	0.859666	1
Q86UE4	570	ETSWESPKQIKKKKK	0.859629	1
O15042	1022	RSPHRSHKKSKKNKH	0.859543	1
P13073	164	ASKWDYEKNEWKKAA	0.859504	1
P20648	25	PGGDMAAKMSKKKKA	0.859397	1
Q06830	192	KPDVQKSKEYFSKQK	0.859379	1
P18124	31	NFAELKIKRLRKKFA	0.859357	1
Q15051	429	TLQRAALKFLAKCRK	0.859046	1
P27216	22	DVDRDAKKLNKACKG	0.859042	1
P10412	26	PVKKKARKSAGAAKR	0.859033	1
Q14008	19	VDQKCEHKLWKARLS	0.858992	1
P07305	169	TVKAKPVKASKPKKA	0.858961	1
Q9Y3L3	143	PAILKHKKSLQKLVS	0.858804	1
Q9BVI0	177	RKATVNVKKDKEDKP	0.858685	1
P26373	177	TEEEKNFKAFASLRM	0.858676	1
Q92794	1147	PDTSTPLKKKKGWPK	0.858659	1
Q9Y603	310	RFLKTPGKMVQDKHS	0.858541	1
Q09666	1191	KMPEMHFKTPKISMP	0.85854	1
Q96BK5	320	TLEETLVKKKKKKDS	0.858518	1
Q09666	1911	KLKGPKFKMPDMHFK	0.858498	1
O60870	23	IKSKGLQKLRWYCQM	0.858409	1
P12235	272	EGAKAFFKGAWSNVL	0.858399	1
O00159	758	RQKFLRVKRSAICIQ	0.85826	1
A8MW92	570	HYRPKQKKKKKKKKK	0.858244	1
P16401	109	TGASGSFKLNKKAAS	0.858226	1
P0C0S8	100	ELNKLLGKVTIAQGG	0.858154	1
Q14669	110	ETNKPHSKSKKRHLD	0.858069	1
P49916	1002	WIWACIRKRRLVAPC	0.857977	1
P07355	313	EFKRKYGKSLYYYIQ	0.857943	1
P11142	601	HQQKELEKVCNPIIT	0.857897	1
Q709C8	154	IKPGRKRKKHKKHFK	0.857886	1
Q01813	736	FQPVAELKKQTDFEH	0.857859	1
Q96KK5	120	QAVLLPKKTESHHKA	0.857852	1
Q6ZUT1	167	KQKKRSHKKQKKSKK	0.857812	1
Q9H7Z3	97	RKHQHHKKTKRKHGP	0.857792	1
P25490	305	CPHKGCTKMFRDNSA	0.857729	1
P04637	372	HSSHLKSKKGQSTSR	0.857644	1
P62910	14	LVKPKIVKKRTKKFI	0.857533	1
Q6ZU35	1219	PAWLALAKRKAKAWS	0.857528	1
P53004	290	GLAEEIQKYCCSRKA	0.857493	1
Q9H7Z3	82	LKQTSRKKKKEKKKK	0.857482	1
Q13129	1371	CKYKECNKRFLCSKA	0.857407	1
Q9UKK9	218	PFEVPFLKFAAAAAA	0.8574	1
O60610	35	SAGGDGGKSKKFTLK	0.857391	1
Q15051	437	FLAKCRKKKKLFAPW	0.857341	1
P04637	370	RAHSSHLKSKKGQST	0.857316	1
Q02880	1256	MKADASKKLLKKKKG	0.857299	1
O00186	11	PVAERGLKSVVWQKI	0.857289	1
Q09666	1184	KLKGPKFKMPEMHFK	0.85725	1
P62081	178	ETFSGVYKKLTGKDV	0.857161	1
Q13009	1420	QYVPFGGKRLCALKG	0.857112	1
P35637	365	EFSGNPIKVSFATRR	0.857103	1
Q9BQI6	25	EEKEALVKLLLKLDC	0.856974	1
P10412	129	KAGAAKAKKPAGAAK	0.856972	1
Q13428	1443	PKSKKEKKKSDKRKK	0.856921	1
Q6SPF0	88	AVLRVSYKGSISYRN	0.856913	1
Q9H9B1	302	TYSLVPKKKTKVLKQ	0.856801	1
P46778	107	KSRDSFLKRVKENDQ	0.85678	1
Q9Y3L3	142	LPAILKHKKSLQKLV	0.856678	1
Q7Z6E9	1745	HKKHKKHKKHKKHAG	0.856662	1
P63000	184	LCPPPVKKRKRKCLL	0.856662	1
P23497	764	GEKKKKFKDPNAPKR	0.856661	1
Q9H8M2	68	ERHKEKKKKKKKKSE	0.856597	1
Q9BQ61	118	STLSFVGKRRGGNKL	0.856532	1
O75691	2746	PDIAAKKKMKKHKNK	0.856516	1
Q9NYF8	681	VFKEENQKGDKKLRC	0.856513	1
P30405	190	KIESFGSKSGRTSKK	0.856481	1
Q02878	218	HLTDAYFKKKKLRKP	0.856395	1
Q5T3I0	28	KHGWTQGKGLGRKEN	0.856225	1
Q9UGP8	527	PKKTAKSKKKKPLKK	0.8562	1
Q92794	1148	DTSTPLKKKKGWPKG	0.856162	1
P19338	71	VVVSPTKKVAVATPA	0.856155	1
P33981	19	TIDSIMNKVRDIKNK	0.856145	1
Q09666	2375	KWKTPKFKMPDMHFK	0.856137	1
Q8IZT6	2954	RAKKYLCKVKAACKI	0.856097	1
Q9Y2S6	59	PLATGGIKKSGKKAA	0.85608	1
Q9H7R0	184	GKKRYDCKECGKTFS	0.856074	1
P67870	212	SNFKSPVKTIRAAAA	0.856053	1
P11142	246	NHFIAEFKRKHKKDI	0.856029	1
O00567	582	AVGKSSSKKKKKFHK	0.85602	1
Q6UB99	767	LYKEERKKKSKDRPS	0.855923	1
Q92794	18	EWILEAIKKVKKQKQ	0.855893	1
P09544	199	RAGRKAVKRFLKQEC	0.855782	1
Q9ULH7	280	PNDKHRSKKCKDPKP	0.855667	1
Q8IZA3	126	RGATGSFKLVPKHKK	0.855531	1
Q6NUK4	244	EVRYGSLKYKVKKRP	0.855512	1
P05783	426	VSETNDTKVLRHAAA	0.855478	1
Q7Z6E9	1733	SKKKKKKKEKKKHKK	0.855461	1
Q8NCQ7	234	GQGSKVIKKVKKKKE	0.85544	1
Q75N03	29	VRRRIPIKLISKQAN	0.855381	1
Q6UB99	719	FKDEKSLKRIKDTNK	0.855379	1
Q9NZN4	316	YIISYLKKEMPSVFG	0.855328	1
Q66PJ3	294	KRGKYKDKRRKKKKK	0.855312	1
Q9H0A0	1003	LEAKQEPKQSKKLKN	0.855281	1
P09429	12	DPKKPRGKMSSYAFF	0.855259	1
Q9HCM1	1388	NVLDMEVKKKKHDKQ	0.855246	1
P16402	153	ATPKKSIKKTPKKVK	0.855146	1
Q06830	16	GHPAPNFKATAVMPD	0.85508	1
P05141	272	EGGKAFFKGAWSNVL	0.855061	1
Q7Z4N2	1590	SGMTAEEKKVKKEKA	0.855029	1
P18621	13	LDPENPTKSCKSRGS	0.855024	1
O15347	43	VNFAEFSKKCSERWK	0.85485	1
O14979	197	GFGFVLFKDAASVDK	0.854791	1
Q03164	254	GNKEDSLKKIKRTPS	0.854748	1
P09429	173	GKPDAAKKGVVKAEK	0.854702	1
Q9NZN4	324	EMPSVFGKENKKKQL	0.854529	1
P10412	46	PVSELITKAVAASKE	0.854467	1
P63000	183	VLCPPPVKKRKRKCL	0.854447	1
O00567	583	VGKSSSKKKKKFHKA	0.854365	1
Q86V81	235	RGAGRNSKQQLSAEE	0.854338	1
Q5BJF6	26	GVTSLTQKKVLRAPC	0.854281	1
Q9UKJ3	710	ESGEKSKKRKKRKRK	0.854095	1
Q15004	15	SVPGTYRKVVAARAP	0.854079	1
O00482	173	NKFGPMYKRDRALKQ	0.854061	1
P16403	34	KAGGTPRKASGPPVS	0.854044	1
O14802	149	LKKKISDKCRKKNIC	0.853886	1
Q9P2K8	1135	RNNILNLKRYCIERV	0.853879	1
O15382	44	LQLEMTQKPHKKPGP	0.85385	1
Q9UBR5	18	RPFCFSVKGHVKMLR	0.853833	1
P04637	373	SSHLKSKKGQSTSRH	0.853741	1
P51648	428	HQRPCLLKSLKREGA	0.85373	1
Q8IZT6	777	CRLFTSEKMVKAIKK	0.853678	1
P09429	112	FCSEYRPKIKGEHPG	0.853613	1
O14776	729	KNKIMQAKEDFKKMM	0.853584	1
P17096	7	AMSESSSKSSQPLAS	0.853422	1
Q6ZQQ6	1394	ISKKEEKKTFQKSPK	0.85342	1
P09429	55	RWKTMSAKEKGKFED	0.853392	1
Q03164	3962	LPCNCGAKKCRKFLN	0.853388	1
P62807	44	SYSVYVYKVLKQVHP	0.853369	1
P10412	153	TPKKSAKKTPKKAKK	0.853307	1
P20290	67	AQVRIGGKGTARRKK	0.853299	1
P78527	2746	LSLMYARKGVAEQKR	0.853239	1
P18621	173	QKKKISQKKLKKQKL	0.853201	1
Q1ED39	267	DDPKASAKKKMKSKK	0.8532	1
Q7Z5J4	1223	DRPLHALKRKSAFMA	0.853183	1
Q96L21	208	PSHGPLDKWRVLHSA	0.853165	1
Q9UBT2	271	RYLLTMDKLWRKRKP	0.853154	1
Q96BK5	321	LEETLVKKKKKKDSK	0.853123	1
Q66PJ3	303	RKKKKKRKKLKKKGK	0.853097	1
Q6DKI1	27	LVPENLLKKRKAYQA	0.853085	1
P06748	223	PSSTPRSKGQESFKK	0.853083	1
Q8IVF2	3414	KSPQVDIKGPKLDLK	0.853024	1
Q9H7N4	641	HRDGGGSKKKKKRSR	0.853019	1
Q92905	30	QSIDEIYKYDKKQQQ	0.853007	1
Q9NR12	444	GKTFYSKKDRPLCKS	0.85299	1
P33778	44	SYSIYVYKVLKQVHP	0.852855	1
O96019	421	QEYEEGGKQCVERKC	0.852826	1
Q9BVI0	548	PKKKKKKKKKTKPEC	0.852823	1
O60885	547	EKDKKEKKKEKHKRK	0.852793	1
P06748	273	AKFINYVKNCFRMTD	0.852775	1
Q9NZN4	327	SVFGKENKKKQLILK	0.852771	1
O15297	137	FTSSEPAKVCAAIRK	0.85277	1
Q5VZK9	29	RKIKISVKKKVKLEV	0.852769	1
Q53GS7	12	GRCWETLKALRSSDK	0.852746	1
Q9UQ35	188	RSPTPKQKKKKKKKD	0.852739	1
Q9BZL1	17	LGKKVRVKCNTDDTI	0.852707	1
Q14123	695	KMLDQRIKMKKIQNI	0.852697	1
Q09666	3741	KIPEMHLKAPKISMP	0.852592	1
Q9BQG0	1167	ATQSPISKKRKKKGF	0.852538	1
Q13428	1455	RKKDKEKKEKKKKAK	0.852504	1
O00567	480	EEMSEKPKKKKKQKP	0.852413	1
Q96L21	101	FHVIRINKMLSCAGA	0.852413	1
P22392	26	GLVGEIIKRFEQKGF	0.852395	1
Q14667	1489	NLSTEALKGLKIDPQ	0.85233	1
Q1ED39	211	SPREHNGKVKKKKKI	0.852283	1
Q9UBI9	195	DTDWYQVKRMQDEKK	0.852273	1
P51532	437	LETALNAKAYKRSKR	0.852268	1
Q09666	4985	PKFGFGAKSPKADIK	0.852245	1
Q5T2T1	311	EILVQPLKVSNRKSS	0.8522	1
Q15361	272	QLLGPTHKKKSKKKK	0.852162	1
P46940	1532	DYYKSYIKTCLDNLA	0.85212	1
Q66PJ3	300	DKRRKKKKKRKKLKK	0.852118	1
Q5T8A7	704	IKDLLRSKRKLKKRC	0.852115	1
Q8IY63	316	PPPEYPFKTKQMMSP	0.852081	1
Q5TAP6	253	IKSKKYHKVVKKGKA	0.852061	1
Q14202	350	FSKKPSGKKTCTFCK	0.851915	1
P27216	21	FDVDRDAKKLNKACK	0.85179	1
Q8IUE6	120	QAVLLPKKTESHKPG	0.851728	1
Q15020	609	KRARAEKKALKKKKK	0.851723	1
Q15910	491	DVDTPPRKKKRKHRL	0.851689	1
P68104	30	TTGHLIYKCGGIDKR	0.851688	1
Q69YH5	565	VLKSCRKKKGKGKKS	0.851597	1
O76021	478	RKASHTPKKWPKKPK	0.851543	1
P52907	273	RTKIDWNKILSYKIG	0.85154	1
Q8IYX8	245	KHSKEKKKSSKKTKC	0.851537	1
Q9BXX2	658	LKPTCGRKVSLPNKA	0.851332	1
P36578	390	KKAAVGVKKQKKPLV	0.851305	1
P47914	114	RARARIAKGLRLCRP	0.851243	1
P42677	5	AAAMPLAKDLLHPSP	0.851218	1
Q14739	601	KYGVAWEKYCQRVPY	0.851213	1
Q6PJG2	12	AQPKAQNKRKRCLFG	0.851198	1
P39748	345	GRLDDFFKVTGSLSS	0.851179	1
Q9Y6X0	529	QHPKFAAKRRWTCSK	0.851158	1
P78527	2702	SVGPDFGKKRLGLPG	0.851118	1
Q6PKX4	20	YVKIRSRKLGIFRRC	0.851097	1
P23528	30	SSTPEEVKKRKKAVL	0.851093	1
P61513	44	YTCSFCGKTKMKRRA	0.851093	1
P13639	525	PKLVEGLKRLAKSDP	0.851013	1
Q6ZUT1	162	KSHKKKQKKRSHKKQ	0.850994	1
P55196	164	FKRTLSKKEKKEKKK	0.850953	1
Q86Y07	83	FYQRVAKKDCIKKWI	0.85094	1
P62851	66	CKEVPNYKLITPAVV	0.85093	1
Q04206	314	ETFKSIMKKSPFSGP	0.850914	1
Q9UKN7	584	KKTLSEKKPIARLRG	0.850903	1
Q6N069	24	ILKCYEQKQYKNGLK	0.850863	1
Q8N7X4	218	EKKESILKADMLKCV	0.850783	1
P30414	443	VKHKKKGKKQKHCRR	0.850783	1
Q9UQ35	210	SSPRRERKKSSKKKK	0.850762	1
P16403	153	TPKKSAKKTPKKAKK	0.850752	1
P62979	94	TPKKNKHKRKKVKLA	0.850689	1
P51784	519	HRLVVPKKGKISDLC	0.850584	1
Q9H2F5	180	EVYEYWIKKRKNCRG	0.850544	1
Q9Y597	750	SEDENENKIEFRKKG	0.850435	1
Q03701	787	PKRKHFIKDIRHLPV	0.85042	1
Q6ZUT1	155	RKHKKSKKSHKKKQK	0.850379	1
Q9Y3A2	34	HLGLLEKKKDYKLRA	0.850376	1
Q14781	283	LKAQATNKCGLGLDL	0.850317	1
A8MW92	571	YRPKQKKKKKKKKKS	0.850203	1
Q5T8A7	426	HRKTPSKKKLVATKT	0.850202	1
P31943	185	HRYIEIFKSSRAEVR	0.850083	1
P20042	17	PTMSKKKKKKKKPFM	0.850044	1
P38432	209	SPKVQAVKDWANQRC	0.850044	1
Q8NCQ7	235	QGSKVIKKVKKKKEK	0.850026	1
P78316	12	KKVGARRKASGAPAG	0.84997	1
Q13523	49	RHKKKKHKHRSKHKK	0.849938	1
P17096	15	SSQPLASKQEKDGTE	0.849909	1
Q9H1E3	155	SSKKKNKKMVKKSKP	0.849876	1
Q9HCE3	1083	IKHKGIRKVYACSHC	0.849835	1
Q14684	594	SQKTASLKKRKKMRV	0.849793	1
O75367	123	KKRGSKGKLEAIITP	0.849781	1
Q8NDD1	239	AQETDIFKKKKRKGQ	0.849729	1
Q09666	2575	KMPEMNIKAPKISMP	0.849713	1
P22090	233	FVIGNGNKPWISLPR	0.849679	1
Q09666	4575	DIHGPEGKLKGPKFK	0.849659	1
Q5T6S3	333	CGKEIKKKKCIFRLR	0.849655	1
P22392	143	PEELVDYKSCAHDWV	0.84964	1
Q9BUG6	469	HSGEKPYKCSKCPRA	0.849629	1
Q9NPI7	233	VSKKEERKRTKKKKE	0.849562	1
P67870	208	LQAASNFKSPVKTIR	0.849546	1
P10412	21	PAEKTPVKKKARKSA	0.849522	1
P16401	93	GLKSLVSKGTLVQTK	0.849451	1
Q92831	78	GSARIAVKKAQLRSA	0.849372	1
P78527	2694	RLQRAPLKSVGPDFG	0.849367	1
O60870	306	HKKKAIVKEVIDKYT	0.84935	1
Q09666	2396	PDLDLHLKSPKAKGE	0.849319	1
Q96L21	198	IPDGCGVKYVPSHGP	0.849316	1
Q13621	934	PYILTLRKKWKDCKL	0.849305	1
Q03188	793	NIGKVNKKSNKKRIC	0.849285	1
Q5T3I0	204	SESKPPKKKKKKRRQ	0.849284	1
P35232	4	AAAAMAAKVFESIGK	0.849236	1
Q09666	4139	PEVDLNLKGPKMKGD	0.849182	1
P20585	99	ENDGPVKKKVKKVQQ	0.849176	1
P16401	120	KAASGEAKPKAKKAG	0.84917	1
P33778	121	EGTKAVTKYTSSKAA	0.849111	1
Q9HCM1	1372	KLKSVSFKQKRKLDQ	0.84907	1
Q5T6S3	328	KSRFLCGKEIKKKKC	0.849041	1
P46776	55	YHPGYFGKVGMKHYH	0.848988	1
Q96GQ7	679	DLALRGKKKRKKFMK	0.848955	1
Q9NR48	1245	STVLSSLKEKHKHKC	0.848935	1
Q04637	1026	KVQQLMAKGSDKRRG	0.84892	1
P68133	328	ALAPSTMKIKIIAPP	0.848884	1
P38159	150	SRGPLPVKRGPPPRS	0.848793	1
A6NCV1	300	KQVKDVFKHTVKKIE	0.848787	1
Q14498	111	FNSAIRGKIGLPHSI	0.848756	1
Q9UQ35	237	RSPTPKSKRKSKDKK	0.84875	1
Q6NXT2	37	TPSTCGVKPHRYRPG	0.848749	1
Q9BQE4	150	PSTSSVLKRKSDRKP	0.848713	1
Q9ULW0	139	QKEKHHVKMKAKRCA	0.848682	1
Q9UIS9	595	AVWLPRSKDLKKPGA	0.848645	1
Q86UE4	444	LPTGKSKKKKKKKKK	0.848644	1
Q9UKI2	16	LKAANNKKGKKFKLR	0.848644	1
P11021	268	RVMEHFIKLYKKKTG	0.848618	1
Q96L21	74	AARICANKYMVKSCG	0.848585	1
Q96RJ0	326	LFGKIFQKDSSRCKL	0.848538	1
Q9BVJ6	762	KRITTRHKKQLKKCS	0.848529	1
P18124	44	FAQKMLRKARRKLIY	0.848478	1
Q8NFP7	127	FKVEDAIKVLQCHKP	0.84846	1
Q1ED39	289	EEPALKRKKKKKRKE	0.848413	1
A5PKW4	780	CRKTPRGKRGWKSFH	0.848406	1
B4DYI2	60	NPPSPSPKKRKRHLV	0.848381	1
Q9NPG3	246	YSGALSVKEMLKKFQ	0.848373	1
Q9Y6X0	1580	LPQEEEVKAKRQRKS	0.84834	1
Q13523	74	KKHKHKHKHKKHKRK	0.848308	1
Q9Y3I0	17	QFLEKINKNCWRIKK	0.848306	1
P35579	651	RTVGQLYKEQLAKLM	0.848305	1
P20810	23	EGPHLPNKKKHKKQA	0.84828	1
P46100	1092	GAYGREKKRCKLLGK	0.848278	1
Q9H8M2	67	RERHKEKKKKKKKKS	0.848264	1
Q6ZQX7	87	LAKRKVKKKKRKKKT	0.848246	1
P78527	2239	RHNLEIIKTLVECWK	0.84823	1
Q6PD62	933	DDDLPISKKKKRRKG	0.84822	1
Q5T6S3	331	FLCGKEIKKKKCIFR	0.848203	1
P25490	301	RTIACPHKGCTKMFR	0.848159	1
Q8NEZ4	4368	SIHIVIPKGTFKPPC	0.848142	1
P09429	43	VNFSEFSKKCSERWK	0.848117	1
Q8IUC4	23	ENDGYFRKGCNPLAQ	0.848115	1
P00558	191	KAGGFLMKKELNYFA	0.8481	1
Q5T200	1005	QKKKSIEKKRKKSKG	0.848012	1
Q9BXX2	624	LKPTCGRKVSLPNKA	0.848004	1
Q8IZQ8	65	DKAKNSLKRKARNRC	0.847946	1
Q96GQ7	660	FQTKEERKKEKIAKA	0.847929	1
Q6UB99	627	PKLDKEGKVVKKHKT	0.847875	1
O95785	1274	TLREILKKKSKPCLI	0.84787	1
P78371	284	EKVERILKHGINCFI	0.847866	1
O00231	417	VVDSLYNKAKKLTAA	0.847832	1
P29966	172	KLSGFSFKKNKKEAG	0.847806	1
Q8IVF2	2589	KGPQLDVKGPKLDLK	0.847768	1
P68104	62	KYAWVLDKLKAERER	0.847726	1
Q5T3I0	8	MNVTPEVKSRGMKFA	0.847725	1
Q9P246	732	CHNGEKSKKPSKIKS	0.84772	1
O14979	76	LAGGAAIKGGRRRRP	0.847693	1
Q86X95	238	LEKKKKKKDRKKKKF	0.847663	1
Q03468	286	AKLSFERKKQGCNKR	0.847661	1
O94776	559	GLGGIMVKRAYETMA	0.847646	1
Q5TIE3	311	KGRTDFIKGMKKKSR	0.847641	1
Q9NWS1	553	RLYGKLAKVAKSNKC	0.847579	1
P29966	161	KKKRFSFKKSFKLSG	0.847553	1
Q9BQ61	159	KYMAEVKKYKAHQCG	0.847544	1
P15924	2702	FIGFEGVKGKKKMSA	0.847544	1
Q16594	108	QTPLPLIKPYSGPRL	0.847538	1
Q96G61	127	FKVEDAIKVLQCHKP	0.847514	1
Q13601	247	ERFLPQFKHKNVNKR	0.847466	1
Q8IVW4	542	DTKGMEVKQIKMLKR	0.847455	1
O00567	478	ECEEMSEKPKKKKKQ	0.847402	1
P20929	5831	NNLASEVKYKADLKK	0.847387	1
Q13523	804	QQLFLALKLLKRCNI	0.847323	1
Q9ULC5	241	YDAENLGKEHFRKPV	0.847322	1
Q15417	158	RFDEGKLKAGQSVIG	0.847317	1
Q8TDI0	97	GSDYSPNKKKKKKLK	0.847304	1
Q99569	790	PSCWGKKKKKKKRTP	0.847282	1
P10155	170	ALALAVTKYKQRNGW	0.847281	1
Q8IVF5	1368	LVYKENCKLKKKLPS	0.847263	1
Q96QC0	306	PVPGIKIKKKKKVLS	0.847259	1
Q9UG63	7	AMPSDLAKKKAAKKK	0.847252	1
Q1ED39	146	EEETRVGKKLKKHKK	0.847251	1
Q86UE4	443	ALPTGKSKKKKKKKK	0.847222	1
O95785	1273	DTLREILKKKSKPCL	0.847153	1
O15417	1455	RELKPNKKYSWMRKK	0.84715	1
Q6ZQQ6	1187	DKKATAQKLKKKHKK	0.847144	1
Q9H8M2	69	RHKEKKKKKKKKSEK	0.847131	1
Q8WZ42	9922	AVKKDAKKVVAKPKE	0.847123	1
P78344	238	CIKTLLEKKKRVQLK	0.847102	1
Q15233	5	AAAMQSNKTFNLEKQ	0.847099	1
P50914	204	GQKAPAQKAPAPKAS	0.847098	1
P62753	215	EYAKLLAKRMKEAKE	0.847095	1
Q15149	4480	VNKGLVDKIMVDRIN	0.847015	1
Q14978	663	ERANQVLKFTKGKSF	0.846941	1
Q5T3I0	437	AGVSTVQKAKKKQKK	0.846939	1
Q99549	152	KEDTSPKKKKKKLRQ	0.846931	1
Q96GQ7	678	FDLALRGKKKRKKFM	0.8469	1
O60239	235	TVDDLQAKLTLAKGE	0.846864	1
O96013	540	PRLKNLHKVSPSLKG	0.846852	1
Q86X95	219	FLKSLTTKQKQKLLR	0.846833	1
Q96ST3	439	TGTTPPVKKKPKLLN	0.846832	1
O43768	60	FLMKRLQKGQKYFDS	0.846751	1
P0C0S8	96	RNDEELNKLLGKVTI	0.846713	1
Q9UQ35	186	SSRSPTPKQKKKKKK	0.846709	1
P15880	183	KPHTVPCKVTGRCGS	0.84669	1
P10412	177	AKSPKKAKAAKPKKA	0.846665	1
P08183	22	NFFKLNNKSEKDKKE	0.846661	1
P52948	572	LQTTGTAKSHLFDGL	0.846652	1
Q9NQS7	630	AKKKAAAKKMEEVEA	0.846595	1
Q15397	115	PKWDDFKKKKKELKQ	0.846581	1
O95025	759	HMQEMKKKRNRRHHR	0.846543	1
Q9HCE3	1050	HVRKEHGKQMKKHPC	0.846532	1
P05455	191	FKDDYFAKKNEERKQ	0.846526	1
P62979	90	KSYTTPKKNKHKRKK	0.84649	1
P19429	40	PHAKKKSKISASRKL	0.846474	1
Q9BTA9	29	SQPYQALKYSSKSHP	0.846446	1
P47914	51	RFAKKHNKKGLKKMQ	0.846433	1
Q9UBC5	1032	NSKLRYKKKGSHCLE	0.84643	1
Q8IZT6	2950	WRRYRAKKYLCKVKA	0.846423	1
Q9BVI0	545	RVKPKKKKKKKKKTK	0.846386	1
Q6YP21	434	FVRFCFIKKDSTLDA	0.846378	1
P62826	134	KDRKVKAKSIVFHRK	0.846311	1
Q9ULH7	276	HPKNPNDKHRSKKCK	0.846271	1
Q8N7X4	196	RLSKDAVKKKACTLA	0.846252	1
P49916	817	IRDDKDWKSATNLPQ	0.846232	1
O14802	153	ISDKCRKKNICHHCG	0.846172	1
Q13601	253	FKHKNVNKRKEPKKK	0.846135	1
P36578	274	WRKAASLKSNYNLPM	0.846109	1
Q9UJA5	145	KTEFAQDKYIKKKKK	0.846086	1
Q9BZE4	584	VSGLRDVKMVKKAKT	0.846054	1
Q9NR12	443	EGKTFYSKKDRPLCK	0.846048	1
Q6DN12	26	LLINLSKKKVKKNPS	0.846019	1
P62888	32	GKYVLGYKQTLKMIR	0.845995	1
Q96BJ3	250	FKHYKPKKRFTSTKC	0.845986	1
Q9Y6X9	265	HGHKVQTKRLSCCLY	0.845979	1
Q6ZQX7	88	AKRKVKKKKRKKKTK	0.845967	1
Q96AX2	214	RDYVESQKKRSSCCS	0.845936	1
Q99569	788	SEPSCWGKKKKKKKR	0.845911	1
P34947	220	ACKRLEKKRIKKRKG	0.845872	1
O60353	540	HNSKVKHKKKHYKPS	0.845872	1
A1X283	605	CGHKVLAKEVKKPNL	0.845863	1
P30414	1000	VKEKLKGKKDKKHKA	0.845862	1
P09429	82	MKTYIPPKGETKKKF	0.845855	1
O43390	126	TKGPDEAKIKALLER	0.845828	1
Q96JM2	106	ANPKPTNKFFQCKFC	0.84582	1
Q92901	250	KTHKGLRKVACIGAW	0.845811	1
Q09666	1177	SLEGPEGKLKGPKFK	0.845777	1
Q8N3F8	670	GHGFPLIKRKVQADQ	0.845754	1
Q9Y485	1624	ILRKCIEKVAKAAFY	0.845752	1
Q96N67	381	KEKLEKLKSQADQFC	0.845727	1
P51532	582	QVAKEKKKKKKKKKA	0.845647	1
Q8N257	44	SYSIYVYKVLKQVHP	0.845642	1
O14639	529	YRKPPIYKQHAALAA	0.845565	1
Q49MI3	378	RRDFAVVKALAKLKA	0.845565	1
Q13435	874	HAAKQKQKKRKAQPQ	0.84553	1
P50914	111	MTDFDRFKVMKAKKM	0.845469	1
P68104	36	YKCGGIDKRTIEKFE	0.845416	1
Q8IZT6	2956	KKYLCKVKAACKIQA	0.845399	1
Q7Z4V5	410	AELEREAKKSAKKPQ	0.845362	1
Q8N895	310	HQGTRPHKCQVCHKA	0.845273	1
P11387	158	KIKTEDTKKEKKRKL	0.845255	1
Q6ZMI0	9	ASAELQGKYQKLAQE	0.845249	1
Q9H7Z3	81	KLKQTSRKKKKEKKK	0.845241	1
Q1ED39	66	PEMPLVKKKKKKKKG	0.845239	1
Q9UIF9	773	EKLKEKVKREKKEKV	0.845163	1
Q8NCQ7	231	TGKGQGSKVIKKVKK	0.845121	1
P17096	67	RPKGSKNKGAAKTRK	0.845108	1
E9PAV3	1971	NILFVITKPDVYKSP	0.84503	1
P62829	43	NLYIISVKGIKGRLN	0.844981	1
Q7Z3U7	11	TSSPEAVKKLLENMQ	0.84497	1
Q7Z4N2	583	EDDEPPAKGKKKKKK	0.844934	1
Q92736	3584	EHPQRSKKAVWHKLL	0.844914	1
O60353	536	FFLKHNSKVKHKKKH	0.8449	1
O15226	28	LVLSKPSKGQKRHLS	0.844875	1
Q8IYD1	369	RYEECKEKLVPFLKK	0.844844	1
Q7Z570	597	FHKSRRKKKRKKLCQ	0.844839	1
P09429	90	GETKKKFKDPNAPKR	0.844776	1
Q5T848	743	NNPHLQKKRCSKKGL	0.844754	1
Q15648	1498	EYSTEKHKKHKKEKK	0.844714	1
Q8IZT6	1802	RKNFLQVKKAATCLQ	0.844713	1
Q02878	39	LKAKKPKKGKPHCSR	0.844713	1
Q07666	200	AKISVLGKGSMRDKA	0.844703	1
P35030	20	PGPGRAVKCGKGLAA	0.844673	1
P52943	27	SLGKDWHKFCLKCER	0.844662	1
Q9UJA5	149	AQDKYIKKKKKKYEA	0.844662	1
P19338	96	AAATPAKKTVTPAKA	0.844652	1
Q9H7R0	380	GEKPYECKQCGKALS	0.844616	1
Q9NPG3	235	LNASKEKKKKKYSGA	0.844603	1
Q93086	218	VKDRSFLKSCHFGPK	0.844578	1
Q9NWS6	14	TTNRSEQKSRKFLKS	0.844577	1
Q6ZU65	314	NSHKSEKKKKRYKDS	0.844572	1
O43768	74	SGDYNMAKAKMKNKQ	0.844569	1
Q3L8U1	581	PKDKDSKKTKTCSKL	0.844557	1
P16402	154	TPKKSIKKTPKKVKK	0.844552	1
P62937	49	GEKGFGYKGSCFHRI	0.844529	1
Q6ZU35	166	HKLAVKPKKQRVSKK	0.844507	1
P55011	1047	PYLLTTKKKWKDCKI	0.844496	1
Q12882	898	AENKIRLKEQNVAFS	0.844467	1
Q8IZT6	1601	RKHQQRQKYKKMKKA	0.844465	1
Q96QE3	476	SFLKEKNKKLKKKNK	0.844461	1
Q01081	175	FCNFMHLKPISRELR	0.844411	1
Q9BZZ5	487	IYNPPSGKYSSNLGN	0.844401	1
P49841	27	PSAFGSMKVSRDKDG	0.844382	1
O14974	1002	SEMEEELKMLPDLKA	0.844305	1
Q92541	225	LKRRFEIKKKLKTAK	0.844302	1
P46013	1512	TSSKPQSKRSLRKVD	0.844287	1
P33778	47	IYVYKVLKQVHPDTG	0.84424	1
O95260	91	FQPSKSHKKVLKKML	0.844239	1
Q04206	315	TFKSIMKKSPFSGPT	0.844225	1
Q5T848	742	TNNPHLQKKRCSKKG	0.84419	1
Q5TAP6	247	ARKEKKIKSKKYHKV	0.844173	1
P11387	23	FRLNDSHKHKDKHKD	0.844171	1
P09544	203	KAVKRFLKQECKCHG	0.844169	1
Q8TD57	1444	ETTKDLAKALAKQCV	0.844163	1
P33778	117	HAVSEGTKAVTKYTS	0.844151	1
P30414	434	HKKRRKEKKVKHKKK	0.844139	1
Q99684	8	MPRSFLVKSKKAHSY	0.844138	1
Q96AG4	207	RKEYDALKAAKREQE	0.844128	1
P35749	1649	EAIKQLRKLQAQMKD	0.844073	1
Q96BT1	205	RPHFPALKKKKRGME	0.844066	1
Q5JUX0	29	SVSVTMIKRKAAHKK	0.844041	1
Q1ED39	287	VIEEPALKRKKKKKR	0.84403	1
P07355	329	DTKGDYQKALLYLCG	0.844012	1
Q15361	274	LGPTHKKKSKKKKKK	0.84399	1
Q96QE3	477	FLKEKNKKLKKKNKK	0.843976	1
Q08AF3	297	RGYVCAIKVEKFCCA	0.843974	1
P51587	2411	KVFVPPFKTKSHFHR	0.843969	1
Q6ZUT1	152	HESRKHKKSKKSHKK	0.843965	1
Q9NZM1	1934	LKAMNPLKAKTASLF	0.843964	1
P68104	392	KKLEDGPKFLKSGDA	0.843959	1
Q68DK7	605	CRLEIQKKQTPHRTC	0.843958	1
O94763	521	EASEETGKRVSKFKA	0.843956	1
P07900	573	TKFENLCKIMKDILE	0.843937	1
Q9UPV0	115	AIKKKKKKKEKKDKK	0.843931	1
Q6NTE8	28	HQVKKSVKWTCKACG	0.843911	1
O60610	42	KSKKFTLKRLMADEL	0.843887	1
Q6ZSB9	316	LKKLNFLKSQKYAEQ	0.843887	1
Q9H4G0	515	QASINELKRTLKEPN	0.843872	1
P0CB48	184	EHPDLDQKGKKSDIC	0.843869	1
P09874	346	FREISYLKKLKVKKQ	0.843857	1
Q8N3Z6	517	PKEGKRGKQKKKERC	0.843806	1
P02768	558	TALVELVKHKPKATK	0.843801	1
P78347	456	DKPASGVKEEWYARI	0.843771	1
Q03468	329	SKKEERLKKHIKKLQ	0.843741	1
Q92831	683	RKQAQIRKVYPGLSC	0.843737	1
Q96CP6	543	LSLEEGGKDARGLLS	0.843706	1
P35579	8	MAQQAADKYLYVDKN	0.843646	1
Q5T5U3	1706	ECDTLSRKKSARFKS	0.843643	1
Q9C0G6	2873	FVPEKVEKVSKACKS	0.843635	1
Q6ZNL6	1291	YLKDRMAKVCDGCFG	0.843614	1
Q9UKJ3	680	HRHKKKKKHKKSSKH	0.843607	1
Q9Y617	333	ELNMLSLKGHRSVGG	0.843573	1
Q8TE49	527	FSKTLGIKLKKNMGG	0.843564	1
Q71F23	303	SQMLTNLKRKNAKMI	0.843534	1
Q6UB99	453	KQQKEKNKVKKKRKK	0.843505	1
Q7Z6E9	1766	KSQKHKHKKKKSKKN	0.843445	1
Q8N3C0	1382	AVYIAPLKALVRERM	0.84342	1
Q86UE4	445	PTGKSKKKKKKKKKQ	0.843411	1
Q09666	3681	PDFDLNLKGPKMKGD	0.843405	1
Q8NE71	29	SPSDKVVKKGKKDKK	0.843396	1
Q15361	53	QSQITRRKKRKKDFQ	0.843378	1
P29973	128	ENKNDPEKKKKKKDK	0.843363	1
Q6ZU65	295	EKEKKPRKKVPKQLG	0.843361	1
O60506	282	LYHQPDDKKKNRGFC	0.843332	1
Q6ZUT1	200	ASGTRKGKQPHKRKK	0.843259	1
Q96G03	91	GFCRYLEKQFSDLKQ	0.843197	1
O75533	195	AASQPPSKRKRRWDQ	0.843164	1
P04908	96	RNDEELNKLLGRVTI	0.84313	1
Q9H981	507	AISLFEGKALGLDKA	0.843113	1
P27695	58	QKTSPSGKPATLKIC	0.843074	1
P00966	408	EYHRLQSKVTAKAAA	0.843041	1
P05305	143	EKDWNNHKKGKDCSK	0.842978	1
Q02880	1255	AMKADASKKLLKKKK	0.842968	1
Q6AHZ1	325	YKIGASRKTFWKRKK	0.842952	1
P68104	453	AGAGKVTKSAQKAQK	0.842948	1
P55072	231	LRHPALFKAIGVKPP	0.842948	1
Q8NFA0	26	RVTDVELKRLKDAFK	0.842936	1
Q9UQ35	190	PTPKQKKKKKKKDRG	0.842929	1
Q9H5I1	129	AIAEYIVKKAKQRIA	0.842924	1
P13639	272	YFDPANGKFSKSATS	0.842903	1
P62701	53	IFLRNRLKYALTGDE	0.842902	1
Q9BPZ2	35	TKKKVSQKKQRGRPS	0.84289	1
Q76FK4	170	IIKYDPSKYCHNLKK	0.842886	1
Q14498	33	NGHEERSKKRKKSKS	0.842836	1
Q9NVU7	268	KKLEKAMKVLKKQKK	0.842828	1
Q9NTZ6	485	FRNEADYKAALCRHK	0.842822	1
O96028	588	LKSQAATKNLSDACK	0.842819	1
Q9UNF1	462	KVLKFACKVQKKDPK	0.842807	1
Q09666	3445	PNLEGDFKGPKVDIK	0.842765	1
Q9UIG0	221	PPKFLPHKYDVKLQN	0.842763	1
Q8IY57	99	TSKKNSHKKTRPRLK	0.842713	1
Q05682	775	RPGDVSSKRNLWEKQ	0.842669	1
Q09666	855	KVPDVELKSAKMDID	0.842624	1
O95639	46	AVCEFFLKAACGKGG	0.842623	1
Q9UG63	224	FTPAMQRKKLKDFSG	0.842599	1
Q76FK4	165	QHKRKIIKYDPSKYC	0.842593	1
P46013	3227	QRVTRSVKRCAENPK	0.842585	1
P61956	33	DGSVVQFKIKRHTPL	0.842575	1
Q9Y3A2	114	MKRVAEAKKIERLKS	0.842566	1
Q08945	628	SSKRDKSKKKKKVKV	0.842561	1
Q12830	2778	LKRDLKIKKEKDLMQ	0.842555	1
Q9Y490	2115	DPAVWQLKNSAKVMV	0.842551	1
P36578	283	NYNLPMHKMINTDLS	0.842544	1
P16403	75	AAGYDVEKNNSRIKL	0.842494	1
O43768	56	GGSDFLMKRLQKGQK	0.842452	1
Q9Y4C8	112	DSTTPEIKKDEKKKK	0.842425	1
Q6ZNL6	1301	DGCFGELKKRGRAVP	0.842385	1
O15078	1916	LIRWEEGKKWQAKIE	0.842372	1
Q15361	273	LLGPTHKKKSKKKKK	0.842369	1
Q7Z406	1469	TLEKKQRKFDQLLAE	0.842365	1
P15311	254	NISFNDKKFVIKPID	0.842353	1
Q9UQ35	225	HRSESESKKRKHRSP	0.842344	1
Q09666	1077	PDVDLDLKGPKMKGN	0.842341	1
Q9UEW8	312	KYGKSFRKLLSLCLQ	0.842328	1
Q69YH5	554	CTKRALPKKSQVLKS	0.842308	1
O75369	15	LAEDAPWKKIQQNTF	0.842292	1
Q96BR9	292	PYCTHVVKRKADLKR	0.842256	1
P40429	159	VTATLEEKRKEKAKI	0.842245	1
Q9GZL7	178	EWNVERNKVKALHCC	0.842245	1
Q09666	4501	DIEGPEGKLKGPKFK	0.842237	1
Q8IZT6	1080	LKHTKSIKKTISLLS	0.842223	1
Q99590	1445	DKYKYSRKGSQKKTL	0.842215	1
P53004	276	KELAAEKKRILHCLG	0.842205	1
Q12986	183	YSYGRGPKVKGKLKC	0.842201	1
Q9NW82	514	GAKLCVVKTQRKAKQ	0.842172	1
Q9NWS1	559	AKVAKSNKCTAKDKL	0.842109	1
Q7Z4V5	67	PYDKCKDKYGKPNKR	0.842101	1
Q9UEY8	685	PSKSPSKKKKKFRTP	0.841998	1
Q14151	501	DRKECEVKKEKLSSV	0.841964	1
Q8IYA6	39	QNTKPYLKSKNNCQN	0.841955	1
Q8WUA2	460	YSNSHKSKYQTDLYE	0.841946	1
P15311	253	RNISFNDKKFVIKPI	0.841942	1
Q13428	1476	SESPSQKKKKKKKKT	0.841933	1
P55196	353	RPPDHIPKKTKKHLE	0.841905	1
Q9P0U4	163	QQQQQQIKRSARMCG	0.841878	1
O96013	546	HKVSPSLKGFLDRLL	0.841867	1
Q7Z7A1	977	FGLDKELKKLKKAVA	0.841859	1
Q8TDI0	110	LKDKKEKKAKRKKKD	0.841859	1
Q00839	543	KMMVAGFKKQMADTG	0.841852	1
O60506	363	KAFSQFGKLERVKKL	0.841846	1
Q8TDM6	1092	SSHLPAKKSCDEDLT	0.84182	1
Q9Y5Q8	339	APSDLPVKAKRSTYN	0.841815	1
Q9Y2A4	396	GEKPYECKQCGKALS	0.84181	1
P52907	278	WNKILSYKIGKEMQN	0.841777	1
Q13009	1309	LVYKDGSKQKKKLVG	0.841776	1
P55196	1807	QGQDVSNKVKASRKL	0.841701	1
P32455	228	LPRLCIRKFFPKKKC	0.841686	1
Q8NE71	174	EEQQPALKGKKGKEE	0.841684	1
O14646	1124	TIPRENIKGFSDAEI	0.841676	1
Q00839	544	MMVAGFKKQMADTGK	0.841666	1
P63241	68	IDIFTGKKYEDICPS	0.841658	1
Q13185	10	SNKTTLQKMGKKQNG	0.841656	1
A6H8Y1	354	TNGWRIDKAFQEKRP	0.841595	1
Q9NPG3	186	FIKEKKKKSPKKRKL	0.841593	1
Q9H223	327	EMPSVFGKENKKREL	0.841533	1
Q8TDI0	98	SDYSPNKKKKKKLKD	0.841523	1
Q6P1Q9	368	YRVWIQCKYCKPLLS	0.841505	1
Q96QE3	203	GTTKNDFKKLRKRKC	0.841453	1
P25398	129	DVIEEYFKCKKAAAA	0.841391	1
Q14202	351	SKKPSGKKTCTFCKK	0.841332	1
Q6ZUT1	158	KKSKKSHKKKQKKRS	0.84132	1
Q03701	1044	HFKKKRIKTTQKTKK	0.841274	1
Q9UKX7	59	SDTGGAFKGFKGLVV	0.841268	1
Q13547	50	LNYGLYRKMEIYRPH	0.841259	1
Q9NXF1	416	HKRKEPNKSIKHCTV	0.84121	1
P86452	83	RKKLILAKKFSKDLG	0.84121	1
Q06830	178	EVCPAGWKPGSDTIK	0.841201	1
Q9NVM6	25	IEEKAADKEVKKAYR	0.841191	1
Q6P4F7	22	LRAFYGIKVKGVRGQ	0.841174	1
Q92800	492	ELMNPSQKKKRKHRL	0.841172	1
O43390	285	LYHQPDDKKKNRGFC	0.841166	1
Q8WXF1	519	GNFEGPNKRRRYAAA	0.841133	1
Q9NPI7	20	DELEDYIKVQKARGL	0.84112	1
Q8NI77	874	NKPTMEHKRNICKIN	0.841088	1
Q6ZNL6	1283	SRNKYPLKYLKDRMA	0.841058	1
Q96P65	408	CEQTEEKKKLKRHLA	0.841055	1
Q9UEW8	320	LLSLCLQKDPSKRPT	0.841036	1
Q9P2Y5	234	TSTSNELKKKSECLQ	0.841031	1
Q9Y6X0	934	FLAHESLKKPKHKRK	0.841016	1
Q8NCQ7	252	DKEEMDEKAKLKKKA	0.841014	1
O43868	129	FLKKLLGKKLTRCLK	0.840945	1
Q99549	151	TKEDTSPKKKKKKLR	0.840896	1
Q27J81	4	AAAAMSVKEGAQRKW	0.840887	1
P09497	207	DFNPKSSKQCKDVSR	0.840834	1
Q8ND82	467	HYMKHQKKGVHRCPK	0.840833	1
P18124	124	IFNGTFVKLNKASIN	0.840826	1
P38432	405	EENLFSWKGAKGRGM	0.84082	1
Q8ND04	242	QKVLPLLKTAIKDCP	0.840802	1
A8MW92	572	RPKQKKKKKKKKKSK	0.840793	1
Q9UMY1	238	NAWGIQKKQNAKRFK	0.840772	1
Q9NVU7	272	KAMKVLKKQKKKKKP	0.840764	1
P55201	493	AKAKSRIKMKKARKI	0.84076	1
Q92794	314	CQICRPRKKGRKLLQ	0.840742	1
Q1ED39	65	APEMPLVKKKKKKKK	0.840691	1
Q9H0A0	989	NASIISLKSDKKRKL	0.84069	1
P62753	211	EEAAEYAKLLAKRMK	0.840674	1
O43676	39	IQKKLAAKGLRDPWG	0.840654	1
Q15361	277	THKKKSKKKKKKKSN	0.840643	1
Q03164	1028	KRVASLLKKAKAQLC	0.840624	1
P68104	55	EMGKGSFKYAWVLDK	0.840613	1
Q9UJY5	176	FEDEEKSKMLARLLK	0.840598	1
P04406	260	AKYDDIKKVVKQASE	0.840584	1
Q9BTU6	243	LALEKVPKVGQRFNR	0.840509	1
P12883	1874	LVDKLQLKVKAYKRQ	0.840499	1
O94761	380	LLRKQAWKQKWRKKG	0.840424	1
Q86X95	247	RKKKKFQKSRSKHKK	0.840374	1
Q09666	2642	HLKMPKVKMPKFSMP	0.84036	1
P47914	52	FAKKHNKKGLKKMQA	0.840295	1
Q5T3I0	377	CSDGRSRKSKKKRQQ	0.840292	1
Q00839	670	QKLLEQYKEESKKAL	0.84022	1
O60506	284	HQPDDKKKNRGFCFL	0.840216	1
O95602	203	WKAHMNAKRCPHCKT	0.840211	1
P51532	580	AAQVAKEKKKKKKKK	0.840176	1
P07900	443	KFYEQFSKNIKLGIH	0.840096	1
Q6XZF7	976	RRKDLVLKYRKGDED	0.840065	1
Q96PV0	333	HLYRDSDKKRKKDKA	0.840049	1
P51532	581	AQVAKEKKKKKKKKK	0.840026	1
Q04206	310	KRTYETFKSIMKKSP	0.840017	1
P30613	348	GIEIPAEKVFLAQKM	0.839955	1
O75140	411	NHSFYTSKSQLFCNS	0.839919	1
Q2KHR3	1073	LMHFNLQKKRAKGKG	0.839915	1
P78545	255	GRPRKLSKEYWDCLE	0.83989	1
Q15059	634	RELERYVKSCLQKKQ	0.839857	1
Q6ZU35	867	CDQQAEQKKKKRHSS	0.839854	1
P38432	186	EAKRKSPKKKEKCEY	0.839852	1
Q6ZMT9	652	PICKLPLKLPKHKKL	0.839823	1
Q9UKN7	578	SLARFLKKTLSEKKP	0.83981	1
Q08050	278	PYFKHIAKPGWKNSI	0.839796	1
Q9UPQ4	138	GHRVQPVKDTAHDFR	0.83977	1
Q09666	2689	NIEGPEGKLKGPKFK	0.839762	1
Q2M2D7	92	WTKYRSTKKLSQRVC	0.839758	1
Q14241	444	LSYDQPRKKKKKIVK	0.839705	1
Q8N5P1	204	CKYFLERKCIKGDQC	0.839648	1
Q8NF91	7666	MRLEEQKKKLAFLLK	0.839645	1
O60506	283	YHQPDDKKKNRGFCF	0.839624	1
P78563	68	GHSKYRLKKRRKTPG	0.839588	1
[truncated: 144,486 more rows]

## Sheet: Table 10
Supplementary Table 10. Tested SET8 ML-hybrid ensemble model predictions for all positively predicted sites (i.e. predicted model scores above 0.82) with peptide array experiments in vitro. Densitometry score of spot on peptide array is listed, along with methylation state determined by human visual verification. Duplicate sites within different proteins have been included. Array location and pos…
[truncated: 2,392 more rows]

[truncated: 5 more sheets: Table 11, Table 12, Table 13, Table 14, Table 15]
